# Supplementary material for: The Role of Selection in Shaping Diversity of Natural M. tuberculosis Populations
Source: PubMed Central journal article supplement (PMC3744410; doi:10.1371/journal.ppat.1003543), 2013-08-15

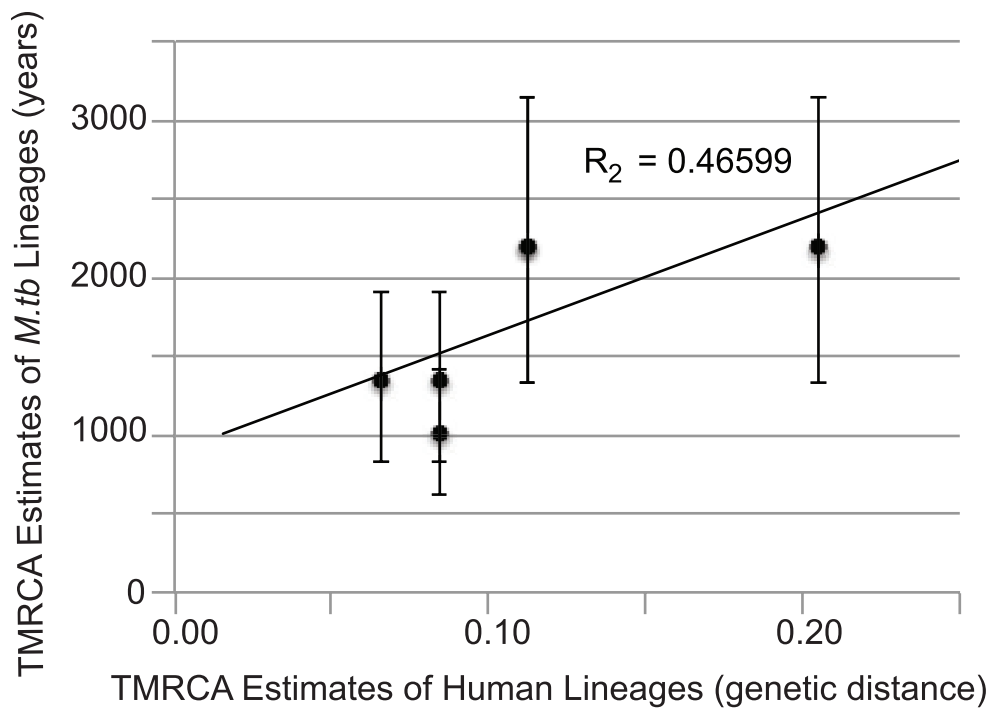

Supplement: ppat.1003543.s001.pdf [file ppat.1003543.s001.pdf]
