# Supplementary material for: The Role of Selection in Shaping Diversity of Natural M. tuberculosis Populations
Source: PubMed Central journal article supplement (PMC3744410; doi:10.1371/journal.ppat.1003543), 2013-08-15
Supplement: ppat.1003543.s009.pdf [file ppat.1003543.s009.pdf]

CDS 129990..131480  
/gene="PE\_PGRS1"  
/locus\_tag="Rv0109"  
/experiment="EXISTENCE: identified in proteomics study"  
/note="Rv0109, (MTV031.03c), len: 496 aa. PE\_PGRS1, Member of the M. tuberculosis PE family, PGRS subfamily of gly-rich proteins (see Brennan and Delogu, 2002), highly similar to many e.g. Q50615|Y0DP\_MYCTU hypothetical glycine-rich 40.8 kDa protein from Mycobacterium tuberculosis (498 aa), FASTA scores: opt: 1772, E(): 0,(57.3% identity in 513 aa overlap); etc."  
/codon\_start=1  
/transl\_table=11  
/product="PE-PGRS family protein PE\_PGRS1"  
/protein\_id="YP\_177692.1"  
/db\_xref="GI:57116691 GeneID:886912"  
/translation="MSLLITSPATVAAAATHLAGIGSALSTANAAAAAPTALSVAGADEVSVLIAALFEAYAQEFYQALSAQALA  
FHDQFVQALNMGAVCYAAAETANATPLQALQTVQQNVLTVVNAPTQALLGRPIIGNGANGLPNTGQDGGPGGLLFGNGGNGSSGG  
VDQAGNGGAAGLIGNGSSGGVGGPIAGSAGGAGGAGLLFGNGGPPGGAGGIGTTGDDGGPGGAGGNAIGLFGSGGTGGMGGVGG  
MGGVNGGNAGNGGTAGLFGHGGAGGAGGIGSADGGLGGGGNGRFRMGNGGVGGAGGYGASGDGNGAGNGGLGGVFGDGGAGGTG  
GLGDVNGGLAGIGGNAGFVRNGGAGGNGQLGSGAVSSAGMGNGGLVFGNGGPGGLGGPGTTSAGNGGGMGNVGLFGQGGAGGA  
GSSGFGAGIPGGRGGDGGSGGLIGDGGTGGGAGAGDAAASAGNGGNARLIGNGGDGGPMPFGGPGGAGGSGGTIFGFAGTTPGPS"  
148141..149604  
/gene="PE\_PGRS2"  
/locus\_tag="Rv0124"  
/experiment="EXISTENCE: identified in proteomics study"  
/note="Rv0124, (MTCI418B.06), len: 487 aa. PE\_PGRS2, Member of the Mycobacterium tuberculosis PE family, PGRS subfamily of gly-rich proteins (see Brennan and Delogu, 2002), highly similar to many e.g. Y0DP\_MYCTU|Q50615 from Mycobacterium tuberculosis (498 aa), FASTA scores: opt: 1730, E(): 0,(60.7% identity in 504 aa overlap)."  
/codon\_start=1  
/transl\_table=11  
/product="PE-PGRS family protein PE\_PGRS2"  
/protein\_id="YP\_177693.1"  
/db\_xref="GI:57116692 GeneID:886883"  
/translation="MSFVSVAPEIVVAAATDLAGIGSAISAANAAAAAPTAVLAAGADEVSAIAALFSGHAQAYQALSAQAAA  
FHQQFVQTLAGGAGAYAAEAQVEQQLLAAINAPTQALLGRPLIGNGADGAPGTGQAGGAGGILYNGGNGGSGAAGQAGGAGGP  
AGLIGHGGSGGAGGSAAGGAGGHGWLWNGGVGGSGGAGVAGVAGGHGGAGGAAGLWAGGGGGNGGADANIVSGDGGGL  
GGAGGGGWLYGDGGAGGHGGQGAIGLGGGAGDGGQGGAGRGLWGTGGAGGHGGQGGGTGGPPLPGQAGMGAAGGAGGLIGNGG  
AGGDGCVGASGGVAGVGGAGGNAMLIGHGGAGGAGDSSFANGAAGGAGGAGHLFGNGGSGGHGAVTAGNTGIGGAGGVGGDA  
RLIGHGGAGGAGDRAGALVGRDGGPGGNGGAGGQLYNGGDGAPGTGGLTQAAVSLVTLFAGPQPQDGTGQPG"  
complement(328607..331480)  
CDS /gene="PE\_PGRS3"  
/locus\_tag="Rv0278c"  
/experiment="EXISTENCE: identified in proteomics study"  
/inference="protein motif:PROSITE:PS00583"  
/note="Rv0278c, (MTV035.06c), len: 957 aa. PE\_PGRS3, Member of the Mycobacterium tuberculosis PE family (see citation below), PGRS subfamily of gly-rich proteins, similar to many e.g. Z95890|MTCY28\_25|Rv1759c from Mycobacterium tuberculosis (914 aa), FASTA scores: opt: 3849, E(): 0,(67.8% identity in 903 aa overlap). Contains PS00583 pfkB family of carbohydrate kinases signature 1."  
/codon\_start=1  
/transl\_table=11  
/product="PE-PGRS family protein PE\_PGRS3"  
/protein\_id="YP\_177707.1"  
/db\_xref="GI:57116712 GeneID:886623"  
/translation="MSFVIAAPEVIAAAATDLASLGSISAANAAAAANTTALMAAGADEVSTAIAALFGAHQAYQALSAQAQA  
FHAQFVQALTSGGGAYAAEAASVPLLDPINEFFLANTGRPLIGNGANGAPGTGANGDGGWLIGNGGAGGSGAAGVNGGAGGN  
GGAGNGGAGGLIGNGGAGGAGVASSGIGSGGAGGNAMLFAGAGGAGGAGGVVALTGAGGAGGAGGNAGLLFGAAGVGGAGG  
FTNGSALGGAGGAGGAGGLFATGGVGGSGGAGSSGGAGGAGGAGGLFGAGGTGGHGFADSSFGVGGAGGAGGLFGAGGEGGSG  
GHSLVAGDGGAGGNAGMLALGAAGGAGGIGDGGTLTAGGIGGAGGAGGNAGLLFGSGGSGGAGGFGFADGGQGGPGNAGTVF  
GSGGAGNGGVGQGFAGGIGGAGGTPGLIGNGGNGNGGASAVTGGNGGIGGTGVLIIGNGGNGSGGIGAGKAGVGGVSGLLLGL  
DGFNAPASTSPLHTLQQNVLVNVEPFQTLTGRPLIGNGANGTPTGTADGGAGGWLFNGANGTPTGTGAAGGAGGWLFNGGGNGG  
HGATNTAATATGGAGGAGGILFGTGGNGGTGGIATGAGGIGGAGGAGGVSLIIGSGGTGGNGGNSIGVAGIGGAGGRGGDAGLLF  
GAAGTGGHGAAGGVPAGVGGAGGNGGLFANGGAGGAGGFNAAGGNGGNGGLFGTGGTGGAGTNFGAGGNGGNGGLFGAGGTGGAA  
GSGGSGITTTGGGGHGNAGLLSLGASGGAGGSGGASSLAGGAGGTGGNGALLFGFRGAGGAGGHGGAALTSIQGGAGGAGGNGG  
LLFGSAGAGGAGGSGANALGACTGGTGGDGGHAGVFGNGDGGCRRVWRRYRRQRWCRQRQRADRQRQRQRQRQRQRGRHARRRH  
RRAARRRERTQRLAIAGRPATTRGVEGISCSPPQMP"  
complement(331730..334243)  
CDS /gene="PE\_PGRS4"  
/locus\_tag="Rv0279c"

/experiment="EXISTENCE: identified in proteomics study"  
/note="Rv0279c, (MTV035.07c), len: 837 aa. PE\_PGRS4, Member of the Mycobacterium tuberculosis PE family, PGRS subfamily of gly-rich proteins (see Brennan and Delogu, 2002), similar to many e.g. Z95890|MTCY28\_25|Rv0278c from Mycobacterium tuberculosis (914 aa), FASTA scores: opt: 2677, E(): 0, (64.5% identity in 926 aa overlap)."  
/codon\_start=1  
/transl\_table=11  
/product="PE-PGRS family protein PE\_PGRS4"  
/protein\_id="YP\_177708.1"  
/db\_xref="GI:57116713 GeneID:886621"  
/translation="MSFVIAAPEVIAAAATDLASLESSIAAANAANAANTTALLAAGADEVSTAVAALFGAHGQAYQALSAQAQA  
FHAQFVQALTSGGGAYAAAEAAATSPLLAPINEFFLANTRPLIINGNTNGAPGTGANGGDGWLIGNGGAGGSGAAGVNGGAGGN  
GGAGGLIGNGGAGGAGGRASTGTGGAGGAGGAAGMLFGAAGVGGPGGFAAAFATGGAGGAGGNGGLFADGGVGGAGGATDAGTG  
GAGSSGNGGLFGAGGTGGPGGFIFGGGAGGDGSSGGLFGAGGTGGSSGTSIINVGGNGGAGGDAGMLSLGAAGGAGGSSGNSNP  
DGGGGAGGIGGDGGLTFLGSSGAGGVCGLGFDAAGGAGGAGKAGLLIAGGAGGAGGGSFAGAGGTGGAGGAPGLVGNAGNGGNGG  
ASANGAGAAGGAGGSGVLIENGGNGGSGGTGAPAGTAGAGGLGGQLLRDGFNAPASTPLHTLQQQILNAINPTQALTGRPLIG  
NGANGTPGTGADGGAGGWLFNGNGNGGHGATGADGGDGGSGGAGGILSGIGGTGGSSGIGTTGQGGTGGTGAALLIGSGGTGGS  
GGFGLDTGGAGGRGGDAGLFLGAAGTGGQAALSQNFAGGTTAGAGGTGGLFANGGAGGAGGFGANGGTGGNGLLFGAGGTGGAG  
TLGADGGAGGHGGLFGAGGTGGAGSSGTTFGGNGGSGNAGLLALGASGGAGGSSGALNVGGTGGVGGNGGSSGSLFGFGGAG  
GTGSSGIGISSGTTGGDGGTAGVFGNGGDGGAGGFGADTGCNSSSVNAVLIENGGNGGKAGGTPGAGGTSGLIIGENGLNG  
L"

CDS

353351..355126  
/gene="PE\_PGRS5"  
/locus\_tag="Rv0297"  
/experiment="EXISTENCE: identified in proteomics study"  
/note="Rv0297, (MTCY63.02), len: 591 aa. PE\_PGRS5, Member of the Mycobacterium tuberculosis PE family, PGRS subfamily of gly-rich proteins (see citation below), highly similar to others e.g. Y03A\_MYCTU|Q10637 from Mycobacterium tuberculosis (603 aa), FASTA scores: opt: 1884, E(): 0, (53.7% identity in 635 aa overlap). This region is a possible MT-complex-specific genomic island (See Becq et al., 2007)."  
/codon\_start=1  
/transl\_table=11  
/product="PE-PGRS family protein PE\_PGRS5"  
/protein\_id="YP\_177713.1"  
/db\_xref="GI:57116718 GeneID:885981"  
/translation="MSFVIAQPEMIAAAAGELASIRSAINAANAANAQAQTGVMSSAADEVSTAVAALFSSHAQAYQAASAQAAA  
FHAQVVRTLTVDAGAYASAEANAGPNMLAAVNAPAQALLGRPLIENGGANGAPGTGQAGGDGGLLFGNGGNGGSGAPGQAGGAGG  
AAGFFGNGGNGGDGGAGANGGAGGTAGWFFGFGNGGAGGIGVAGINGGLGGAGGDGNGAGFFGNGGNGGMGAGAAAGVNAVNP  
LATPVTTPAANGNGLNLVGPVGTAGGGADGANGSAIGQAGGAGGDGNGASTSGGIGIAQTGGAGGAGGAGGDGAPGGNGGNGGSSV  
EHTGATGSSASGNGATGGNGGVGAPGGAGGNGGHVSGGSVNTAGAGGKGGNGGTGGAGGPGGHGGSVLSGPVGDSDGNGGAGGDG  
GAGVSATDIAGTGGRGNGGHGGLWIGNGGDGGAGGVGGVGGAGAAGAIGGHGGDGGSVNTPIGGSEAGDGGKGGGLGGDGGGRGI  
FGQFGAGGAGGAGGVGGAGGAGGTGGGGGNGGAIIFNAGTPGAAGTGGDGGVGGTGAAGGKGGAGGSSGNGATGADGAKGLDGT  
GGKGNNGNPG"

CDS 581291..583075  
/gene="PE\_PGRS6"  
/locus\_tag="Rv0532"  
/note="Rv0532, (MTCY25D10.11), len: 594 aa. PE\_PGRS6, Member of the Mycobacterium tuberculosis PE family, PGRS subfamily of gly-rich proteins (see citation below), similar to others e.g. Y0DP\_MYCTU|Q50615 from Mycobacterium tuberculosis (498 aa), FASTA scores: opt: 1703, E(): 0, (58.2% identity in 536 aa overlap)."  
/codon\_start=1  
/transl\_table=11  
/product="PE-PGRS family protein PE\_PGRS6"  
/protein\_id="YP\_177736.1"  
/db\_xref="GI:57116752 GeneID:887391"  
/translation="MSNLLVTPELVAAAAADLAGIGSAIGAANAAAGAPTMLLAAGADEVSAAVAAVFSSYAQQYQALSAAAAA  
FHDQFVRLAAGAGAYAGAEANVEQQLLNAINAPTLLALLGRPLIGNGADGAAGTGQAGGAGGLLYGNGGNGGSGAAGQAGGAGG  
AAGLIGHGGTGGAVTGVSTTGGPGGHGGDAGLYGFGGAGGAGGFGQSGAAGGAGGAGGWLYGDGGDGGAGDNGGNESTGVS  
AVG  
GVGGAGGAGGLLFGNGGDGGVGGDGGDGSSTQDSGGDGGAGGAGGAGGWLLGNGGAGGAGGAASIKVATGGLGGDGGDAGLFGFG  
GDGGWGGRGVDARFGAAGGAAGAGGAGGWLYGDGGAGGVGGVGGAVFSLSSGDGGAGGAGGGGGWLFNGGDDGGAGGGGGGRFGS  
GSGAGGDGAVGGAGGAGAWFNGGAGGVGGGGGRGTTAIGGDGGAGGAGGAGGWLYGDGGAGGAGGGGGRGCTGNDGGDGGDGG  
GGDAQLLNGGDDGGAGGAPGLALPPGPARPAGAAVPAVRCSAAPARPARTADPWLAPIFARSTLRHSHHLLGGIAQTGAVADQ  
QGQIAGLGRAGRQ"

CDS complement(630494..634414)  
/gene="PE\_PGRS7"  
/locus\_tag="Rv0578c"  
/experiment="EXISTENCE: identified in proteomics study"  
/inference="protein motif:PROSITE:PS00583"  
/note="Rv0578c, (MTV039.16c), len: 1306 aa. PE\_PGRS7, Member of the Mycobacterium tuberculosis PE family, PGRS subfamily of gly-rich proteins (see citation below), highly similar to many other PGRS proteins e.g. MTCY493.04|Z95844 from Mycobacterium tuberculosis (1329 aa), FASTA scores: opt: 3994, E(): 0, (54.6% identity in 1375 aa overlap). Contains two PS00583 pfkB family of carbohydrate kinases signatures possibly fortuitously."  
/codon\_start=1  
/transl\_table=11  
/product="PE-PGRS family protein PE\_PGRS7"  
/protein\_id="YP\_177739.1"  
/db\_xref="GI:57116755 GeneID:887725"  
/translation="MSFVIATPEMLTTAATDLAKIGSTITAANTAAAVAKVLPASADEVSVAVAALFGTHAQEYQTVSAQVATF  
HDRFVQTLSSAAASSYVAEEAVNVEQSLLAAVNAPTQALFGRPLIGNGADGSPGTGQAGGPGGILYNGGNGGSGAPGQRGGAGGA  
AGLIGNGNGGAGGVGTTGGAGGHGGAGGWLYGNGGAGGFGGAGAVGGNGGAGGTAGLFGVGGAGGAGNGIAGVTGTSASTPGG  
SGTAGGAGGIGGNGGAGGAGVLMGNGGNGGAGGEGGPGGAGGAGASGAHATNLGADQAGGNGGNGGAGGTGCVGGPGGGHGLL  
GLGGSHGAGGAGSGDGGAPGDGNGATGTWGHNLGAGGTGNGGNGPAGGAGGAGGASVGGSAHGANGAPGTTSTSGGNGGDG  
GKGADAISSGQTGANGRGGDGGQVNGGAGGAGGRGGAGGLGFGSEAPGRPGGAGGTGAGGNGGTQAGDGGTGGAGGAGDGG  
SGGAGSIGFNASAPGAAGSPGGNGGNGGPGGAGGEGGAGGLALAASQNGSQAGGDGGAGGNGGTPNGGGHGAAGALGVNNGVG  
GAGGHGDPGVGGAGGQGGSGSTPGANGAPGNTPTSGNGGNGGRGADATGFGQTGASGGRGGDGLVNGGAGGAGGNGSKGLP  
GLGRLGNPGLDGGTGGNGGAGGSGGAWAGNGGTGGAGGTGGVGGTGGSGSDVNGSSAGADGHPGGTGGVGGTGGKGGDGGDGG  
APNGVAGSQPGGAGDGGTGGVGGNGGRIDGADGATAGARGQDGGAGGAGGKGRGGTGGPGGAGPAGTTGSGQAGGNGGSGG  
TGGDPPDGGNGANGSVFTNNGIGGNGGNGGNAGPSGAGGSGGAGSTFGATGSSSSIHVNGGNGGNGGNDHALSGNGAAGNGGN  
GGNGSLRSGGAGGHGNGGNASRGMGGDGGTGGAGGNAGQIGNGGAGGNGDGGTGSDDGNPGAITGSGRGGDGGVGGQGGGVA  
GDGADGRRGGAGGTGGTGLRGTGATGATGTFDAGADGHGNGGTGGVGGTGGAGGGGNGGAGGKALSPTGNNGSQAGGDGGA  
GGAGGTGGTGGDGGRGAHGTLFSSLAGTGGTGGNGGTGGTGGTGGAGGAGGTGSTLGGTGGTGAAGRAGNGVGGSGGLGSAFGP  
GGTGMGGAGGTSTVSAGDGGRRGGFGGDGLDASSGNGGDDGGHGGDGFRTAGAGRRGGDGGKADPGGLFPIPGAGGKGGTGGT  
GGTAHLGLPLAIIGQSQPGQFGSPGADGRGGAGGAGGGGGAGGSF"

CDS 791479..792006  
/gene="PE\_PGRS8"  
/locus\_tag="Rv0742"  
/note="Rv0742, (MTV041.16), len: 175 aa. PE\_PGRS8, Member of the Mycobacterium tuberculosis PE family, PGRS subfamily of gly-rich proteins (see citation below), similar to many Mycobacterium tuberculosis PGRS-type proteins e.g. Z78020|MTCY1A11\_25 (498 aa), FASTA scores: opt: 766, E(): 6.1e-25, (73.6% identity in 178 aa overlap). Similarity suggests ORF starts with ATA start codon. This region is a possible MT-complex-specific genomic island (See Becq et al., 2007)."  
/codon\_start=1  
/transl\_table=11  
/product="PE-PGRS family protein PE\_PGRS8"  
/protein\_id="YP\_177749.1"  
/db\_xref="GI:57116772 GeneID:888645"  
/translation="MSFVIAAPEAIAAAATDLASIGSTIGAANAAAAANTTAVLAAGADQVSVIAIAAFGAHQAYQALSQAAT  
FHIQFVQALTAGAGSYAAEAASAASITSPLLDAINAPFLAALGRPLIGNGADGAPGTGAAGGAGGLLFGNGGAGGSGAPGGAGG  
LLFGNGGAGGPGASGGALG"

CDS

```

794199..796550
/gene="PE_PGRS9"
/locus_tag="Rv0746"
/experiment="EXISTENCE: identified in proteomics study"
/note="Rv0746, (MTV041.20), len: 783 aa. PE_PGRS9, Member of the Mycobacterium tuberculosis PE family, PGRS subfamily of gly-rich proteins (see citation below), highly similar to part of MTCY28.25c|Rv1759c|Z95890 antigen wag22 from M. tuberculosis (914 aa), FASTA scores: opt: 2429, E(): 0,(56.9% identity in 873 aa overlap). Also similar to other PE-PGRS family proteins e.g. AL0212|MTV008_46 FASTA score: (48.8% identity in 887 aa overlap); etc. This region is a possible MT-complex-specific genomic island (See Becq et al., 2007)."
```

CDS

```

796949..799354
/gene="PE_PGRS10"
/locus_tag="Rv0747"
/experiment="EXISTENCE: identified in proteomics study"
/inference="protein motif:PROSITE:PS00012"
/note="Rv0747, (MTV041.21), len: 801 aa. PE_PGRS10, Member of the Mycobacterium tuberculosis PE family, PGRS subfamily of gly-rich proteins (see citation below), highly similar to part of MTCY28.25c|Rv1759c|Z95890 antigen wag22 from M. tuberculosis (914 aa), FASTA scores: opt: 2772, E(): 0,(60.9% identity in 941 aa overlap). Also similar to other PE-PGRS family proteins e.g. Z95844|MTCY493_2 FASTA score: (50.2% identity in 815 aa overlap). Contains PS00012 Phosphopantetheine attachment site. This region is a possible MT-complex-specific genomic island (See Becq et al., 2007)."
```

CDS

```

804657..806411
/gene="PE_PGRS11"
/locus_tag="Rv0754"
/experiment="EXISTENCE: identified in proteomics study"
/note="Rv0754, (MTV041.28), len: 584 aa. PE_PGRS11, Member of the Mycobacterium tuberculosis PE family, PGRS subfamily of gly-rich proteins (see citation below), similar to others e.g. AL0212|MTV008_46 from Mycobacterium tuberculosis (1660 aa), FASTA score: (48.7% identity in 345 aa overlap); Z80225|MTCY441_4 from Mycobacterium tuberculosis (778 aa), FASTA score: (41.6% identity in 442 aa overlap); etc."
```

YHEQFVHRLSAAATSYAVTEVTIATSLRGALGSAPASVSDGFQAFVYGPPIHATGQQWINSVPVGEALAPIVNAPTNVLLGRDLIGN  
GVTGTAAAPNGGPGGLLFGDGGAGYTGNGGSSAGLIGNGGTGGAGVFAGVGGMGTTGGWLMGNGGMMGGAGVGGNGGAGGQALLF  
GNGLLGGAGGAGVDGAIGRGGWFITGGMATIGGGNGQSIVIDFVRHGQTPGNAAMLIDTAVPGPGLTALGQQQAQAIANALA  
AKGYPYAGIFDSQLIRTQQTAAPLANLLGMAPQVLPGLNETHAGIFEDLPQISPAGLLYLVPPIAWTLGFPIVPLAPGSTDVNGI  
VFNRAFTGAVQTIYDASLANPVVAADGNITSVAYSSAFTIGVGTMMNVDNPHPLLLLTHPVPNTGAVVVQGNPEGGWTLVSWDGI  
PVGPSLPTALFVDVRELITAPQYAAAYDIWESLFTGDPAAVINAVRDGADEVGAAVVQFPHAVADDVIDATGHPYLSGLPIGLPS  
LIP"

CDS

881511..881924  
/gene="PE\_PGRS12"  
/locus\_tag="Rv0832"  
/experiment="EXISTENCE: identified in proteomics study"  
/note="Rv0832, (MTV043.24), len: 137 aa. PE\_PGRS12, Member of the Mycobacterium tuberculosis PE family, possibly PGRS subfamily of gly-rich proteins (see citation below), highly similar to many others e.g. MTCY1A11.25c|Z78020 (498 aa), FASTA scores: opt: 529, E(): 5.2e-22, (61.8% identity in 136 aa overlap); etc. Appears to have incurred frameshift as next ORF should be continuation; sequence has been checked but no error found."  
/codon\_start=1  
/transl\_table=11  
/product="PE-PGRS family protein PE\_PGRS12"  
/protein\_id="YP\_177759.1"  
/db\_xref="GI:57116787 GeneID:885236"  
/translation="MSYVSVLPATLATAATEVARIGSALSASAVAAAQTSAVQAAADEVSAIAALFSAHGRDFQALSARAAA  
FHHEFVQALAAGAGSYAVAEIAAASPLQSLIDVFNAPIQAATGRPLIGNGANGQPPTGAPGGPAGG"

CDS

881921..884170  
/gene="PE\_PGRS13"  
/locus\_tag="Rv0833"  
/note="Rv0833, (MTV043.25), len: 749 aa. PE\_PGRS13, Member of the Mycobacterium tuberculosis PE family, PGRS subfamily of gly-rich proteins (see Brennan and Delogu, 2002), but lacking N-terminal domain (present in preceding ORF), possibly due to frameshift. Similar in part to many others e.g. MTCY28\_25|Z95890 (914 aa), FASTA scores: opt: 2726, E(): 0, (60.1% identity in 776 aa overlap); etc."  
/codon\_start=1  
/transl\_table=11  
/product="PE-PGRS family protein PE\_PGRS13"  
/protein\_id="YP\_177760.1"  
/db\_xref="GI:57116788 GeneID:885391"  
/translation="MIGNGGAGGSGAPGAIGGAGGPAGLIGVGGAGGAGGDSAVAGVIGGAGGAGGAALLFGAGGAGGAGGSSGS  
GAAGGAGGAGGAGGLFASGGSGGFGGFASTGTGGAGGTGGAGGLFASGGVGGTGGGAGSGGTGGVGGTGGAGGLFASGGAGGAGG  
SGGTGGAGGTGGAGGLFGAGGAGGLGGQGNHTGGHGGAGGSAGLLALGDGGAGGAGGAATTGTGGAGGAGGKAGLLFGSGGAGGS  
GGAAGTFGDTGNSSGAGGAGGKAGLLFGSGGAGGSGGAGGFANGSTGGAGGAGGGAGLIGNGGNGSGGTSVATGGAGNGGAGGA  
GGGAGLIGNGGNGSGMGDAPGGTGVGGIGLLGLDGANAPASTNPLHTAQQQALAAVNAPIQAVTGRPLIGNGANGAPGSGA  
PGGHGGLWLFGGGTTGGSGVSGGAGGDGGAGGILFGAGGAGGAGAVTGTGATGSGGAGGGALLFGAGGAGGAGSSGIGGFAAG  
GAGGPGGAGGLFNGGGAGGAGSGVSGGAGGEGGAGGAGLFGAGGAGGAGGSGNNVGGAGGAGGVGGLFGAGGAGGSGGGGSSVA  
GDSGAGGNAGLLAPGLAGGAGGGGGQGFDTGGAGGPGDAGLLVSGGSGGAGGFLTTGGPGAAGGDAGLLFGSGGAGGAGGSG  
RTDLGGAGGAGGKAGLIGNGGNGGAGGAGGNGGGDGGPGGAAFGLGNGGNGGNGTGTTSAGSPGAGGAGGSLIGAEGLPGLLP"

CDS

complement(884397..887045)  
/gene="PE\_PGRS14"  
/locus\_tag="Rv0834c"  
/experiment="EXISTENCE: identified in proteomics study"  
/note="Rv0834c, (MTV043.26c), len: 882 aa. PE\_PGRS14, Member of the Mycobacterium tuberculosis PE family, PGRS subfamily of gly-rich proteins (see Brennan & Delogu 2002), highly similar to many others e.g. MTCY493\_4|Z95844 (1329 aa), FASTA scores: opt: 2577, E(): 0, (52.0% identity in 950 aa overlap); etc. Thought to be differentially expressed within host cells (see Triccas et al., 1999)."  
/codon\_start=1  
/transl\_table=11  
/product="PE-PGRS family protein PE\_PGRS14"  
/protein\_id="YP\_177761.1"  
/db\_xref="GI:57116789 GeneID:885369"  
/translation="MSFVIAAPDLVAMATEDLAGIGASLTAANAAAAPVPTSGLLAAAGDEVSAIAALFSSHGQQYQAMSAQAAA  
FHARFVQALAGAMGAYAAEAANASPLQTLQGLLGAINAPAAALSGRPFIGNGTNGAPGTGEAGGPGWLLGNGGNGGSGAPGQ  
TGGAGGAAGLLGHGGTGGAGGTGASGGKGGTGGWLWSSGGAGGAGGSGGGSGGAGGNALMFGIGGNGGAGGAASGVGNGGVGGAG  
GAGGALVAIGGAGGAGGAATTGTGGAGGAGSNALGLFLGLGGSGGQGGDSAMGSGGAGGAGGSGGAASPFIDIGIGGAGGHGGA  
GTNNGAGGAGGAGGSSGTVFALDLSWGGAGGNGGAATTGTGGAGGTGGFAVAPDFIGFGAAYGGAGGLGGAATGAGGTGGTGGVG  
AGGFALGVGVGGAGGAGGAATETGGIGGAGGLGVLLGGAGGAGGPGGAASAGSGGHGGTGGDALGLIGAGIGGVGGVGGAAATD  
TGGNGGAGGSGTGLLGGVGGAGGHGGGASVGTGSGGAGGDGFGFVGGAGGNGNAGTGVGVNANGGNGGSAATGALAAVGGAGAA  
GGDATSGTGGFAGGAGSARGLIFALGGAGAAGGDASTGVGGPGGPGGTGTASSPFGIAIAIGGAGAQQGAGTSGATGGAGGDGVF  
EGIAVLGLGFGGAAGAGGAATGDGATGGAGGFGGAGAGIANFLGFSVLHGGAGGAGGTATGTGGNGGAGGGGGLSSPVILGIGIG

CDS

GAGGDGGGALGVLLGGMGDDGGDGGEEAVAVGIAVGGAGGAGGAAPTGNNGGAGGNGGDALGLVGVGGNGNAGTGFAGANTGGNGGDT  
TIVVNGMLAPSTLGYGGNGGNGVNGGAGGTGGKAGVFGAPGQNGLP"  
complement(924984..926804)  
/gene="PE\_PGRS15"  
/locus\_tag="Rv0872c"  
/experiment="EXISTENCE: identified in proteomics study"  
/inference="protein motif:PROSITE:PS00017"  
/note="Rv0872c, (MTV043.65c), len: 606 aa. PE\_PGRS15, Member of the Mycobacterium  
tuberculosis PE family, PGRS subfamily of gly-rich proteins (see Brennan & Delogu  
2002), similar to many e.g. MTCY24A1.04c|Z95207 (615 aa), FASTA scores: opt: 2636,  
E(): 0, (64.6% identity in 619 aa overlap); etc."  
/codon\_start=1  
/transl\_table=11  
/product="PE-PGRS family protein PE\_PGRS15"  
/protein\_id="YP\_177763.1"  
/db\_xref="GI:57116793 GeneID:885742"  
/translation="MSYVLATPEMVAAAANNLAQIGSTLSAANAALAPTTLVLAAGADEVSAAVASLFSGHAQAYQTLGTQAAA  
FHERFIQALSTAAGAYGSAEAAANASPLQALNVINAPTQTLGRPLIGNGTNGAPGTGQAGGPGGLLYGNGNGGSGGVGQAGGA  
GGSAGLIGIGGTGGAGGAGAVGVGGNGGWLGYNGGAGGLGTTGTVAGVNGMGAAAGGAGGNAYLFGSGGAGGQGMGAAGADGVN  
PTPTGTADAGSTGTDQTLGGNAIGGNGGPGDAGDAMTSGGAGGSGGNVSTVNGDAVGGEGGKGGEGAYGGAGGAGGSAASIGNA  
AIGNGGAGGNAQAPGGVGGAGGEGGDAQVGTNSPNSAEAGNGGSGNGFDSFASGTTGGAGGTGGAGGRGGLLIGDGGAGGAGG  
VGGTGGSGAPGGGGGAGGDGGAANTDSAGSSRKAFGGDGGVGGDGSALGTGGEGGIGGQCGNGGAGGLLIGNGGAGGVGGTAGA  
GGTGGSGGAGGAGGGGTNSGPGAAFGGNGNTGGNGGNGGAPGALGGKGGSGGLIGRAGSDGGVGGAGGAGGAGGAGGTGGEGG  
TGGDGKTTDGNPMMGGSPGSAGQPG"

CDS

1044329..1047100  
/gene="PE\_PGRS16"  
/locus\_tag="Rv0977"  
/note="Rv0977, (MTV044.05), len: 923 aa. PE\_PGRS16, Member of the Mycobacterium  
tuberculosis PE family, PGRS subfamily of gly-rich proteins (see citation below),  
highly similar to other PGRS-type sequences e.g. AL0091|MTV004\_1 from Mycobacterium  
tuberculosis (1125 aa), FASTA score: (45.4% identity in 959 aa overlap);  
Z80225|MTCY441\_4 from Mycobacterium tuberculosis (778 aa), FASTA score: (51.5%  
identity in 750 aa overlap); etc."  
/codon\_start=1  
/transl\_table=11  
/product="PE-PGRS family protein PE\_PGRS16"  
/protein\_id="YP\_177773.1"  
/db\_xref="GI:57116805 GeneID:885264"  
/translation="MSFVVTAPPVLAASAADLGGIASMISEANAMA AAVRTTALAPAAADEVSAIAALFSSYARDYQTLVSVQVTA  
FHVQFAQTLTNAGQLYAVVDVGNVLLKTEQQVLGVINAPTQTLVGRPLIGDGTGHGAPGTGQNGGAGGILWNGNGGSGAPGQP  
GGRGGDAGLFGHGGHGGVGGPGIAGAAGTAGLPGGNGANGGSGGIGGAGGAGGNGGLLFGNGGAGGQGGSGGLGSGGTGGAGMA  
AGPAGGTGGIGGIGGIGGAGGVGGHGSALFGHGGINGDGGTGGMGGQGGAGGNGWAAEGITVGIQEQQGGQGGDGGAGGAGGIGGS  
AGGIGGSQAGGHGGDGGQGGAGGSGGVGGGAGAGDGGAGGIGGTGGNGS IGGAAAGNGGNGRGGAGGMATAGSDGNGGGGGG  
NGGVGVSAGGAGGTGGDGAAGAGGAPGHGYFQPPAPQGLPIGTGGTGGEGGAGGAGDGGQGDIGFDGGRGGDGGPGGGGGAG  
GDGSGTFNAQANNGDGGAGGVGGAGGTGGTGGVADGGRGGDSGRGGDGGNAGHGAAQFSGRGAYGGEGGSGGAGGNAGGAGT  
GGTAGSGGAGGFGGNGADGGNGGNGGNGGFGGINGTFTNGAGGTGGLGTLGGHNGNIGLNGATGGIGSTLTNATVPLQLVNT  
TEPVVFI SLNQQMVPVLLD TGSTGLVMSDQFLTQNFQVPIGTGTAGYAGGLTYNYNTYSTTVDFGNGLLTLPTSVNVVTSSSPG  
TLGNFLSRSGAVGLGIGPNNGFPGTSSIVTAMPGLLNNGLVIDESAGILQFGPNTLTGGITISGAPISTVAVQIDNGLPQQAPV  
MFDSGGINGTIPSALASLPSGGFVPAGTTISVYTSDDGQTL LLSYTTTATNTPFVTSGGVMNTGHVPFAQQPIYVYSYPTAIGTTT  
FN"

CDS

complement(1047317..1048312)  
/gene="PE\_PGRS17"  
/locus\_tag="Rv0978c"  
/experiment="EXISTENCE: identified in proteomics study"  
/note="Rv0978c, (MTV044.06c), len: 331 aa. PE\_PGRS17, Member of the Mycobacterium  
tuberculosis PE family, PGRS subfamily of gly-rich proteins (see citation below),  
highly similar to others e.g. Z95387|MTCY1A10\_19 from Mycobacterium tuberculosis (461  
aa), FASTA score: (73.6% identity in 277 aa overlap); etc."  
/codon\_start=1  
/transl\_table=11  
/product="PE-PGRS family protein PE\_PGRS17"  
/protein\_id="YP\_177774.1"  
/db\_xref="GI:57116806 GeneID:885077"  
/translation="MSFVNVAPQLVSTAAADAARIGSAINTANTAAAATTQVLAQAQDEVSTAI AALFSGSHGQHYQAI SAQVAAY  
QQRVFLALSQAGSTYAVAEASATPLQNVLDIAINAPVQSLTGRPLIGDGGANGIDGTGQAGGNGGWLWNGNGGSGAPGQAGGAG  
GAAGLIGNGGAGGTGGAVSLARAGTAGGAGRGPVGGIGGAGGVGGAGGAAGAVTTITHASFNDPHGVAVNPGGNVYVTFNGSGTV  
SVINPATNTVTGSPITIGNPSGVAVSPVTGLVFVTFNDSNTVSVIDPTTNTVTGSPITVGTAPTGVAVNPVTGEVYVTFNAGDT  
VSVIS"

CDS

complement(1049034..1050407)

```

/gene="PE_PGRS18"
/locus_tag="Rv0980c"
/note="Rv0980c, (MTV044.08c), len: 457 aa. PE_PGRS18,Member of the Mycobacterium tuberculosis PE family, PGRS subfamily of gly-rich proteins (see Brennan & Delogu 2002),highly similar to others e.g. Z95387|MTCY1A10_19 from Mycobacterium tuberculosis (461 aa), FASTA score: (66.7% identity in 405 aa overlap); Z95844|MTCY493_2 from Mycobacterium tuberculosis (741 aa), FASTA score: (53.0% identity in 394 aa overlap); etc. Predicted to be an outer membrane protein (See Song et al., 2008)."
```

CDS

```

/codon_start=1
/transl_table=11
/product="PE-PGRS family protein PE_PGRS18"
/protein_id="YP_177775.1"
/db_xref="GI:57116809 GeneID:885327"
/translation="MSFVNVPQLVSTAAADAARIGSAINTANTAAAATTQVLA AAHDEVSTAI AALFGSHGQHQAISAQVAAY
QERFVLALSQASSTYAVAEASATPLQNVLDAINAPVQSLTGRPLIGDGANGIDGTGQAGGNGGWLWNGNGGGSGAPGQAGGAG
GAAGLIGNGGAGGAGGQGLPFEAGANGGAGGAGWLFNGGAGGVGGAGGAGTTFGVAGGDDGTGGVGGHGLIGVGGHGGDGGT
GGTGGAVSLARAGTAGGAGGGPAGGIGGAGGVGGAGGAAGAVTTITHASFNDPHGVAVNPPGGNIYVTNQGSNTVSVIDPVNTVTV
GSITDGNPSPGVAVSPVTGLVFTNFDSENTVSVIDPNTNVTGSIPIVGTGAYGVAVNPPGGNIYVTNQFSNTVSVIDPATNTVTVGS
PIPVGLDPTGVAVNPPVTGVVYVINSLLDDTVSVITGEPARSVCSAAI"
complement(1141201..1143204)
/gene="PE_PGRS19"
/locus_tag="Rv1067c"
/experiment="EXISTENCE: identified in proteomics study"
/inference="protein motif:PROSITE:PS00583"
/note="Rv1067c, (MTV017.20c), len: 667 aa. PE_PGRS19,Member of the Mycobacterium tuberculosis PE family, PGRS subfamily of gly-rich proteins (see Brennan & Delogu 2002). Similar to Rv3388|MTV004.46 M. tuberculosis (731 aa), FASTA scores: opt: 2227, E(): 0, (55.6% identity in 710 aa overlap). Contains PS00583 pfkB family of carbohydrate kinases signature 1, probably fortuitous. Predicted to be an outer membrane protein (See Song et al., 2008)."
```

CDS

```

/codon_start=1
/transl_table=11
/product="PE-PGRS family protein PE_PGRS19"
/protein_id="YP_177780.1"
/db_xref="GI:57116818 GeneID:887122"
/translation="MSFVLVSPSQLMAAAADVAGIGSAISAANAAALAPTSVLAAGADEVSAAVAALFSAHAGQYQQLGARAAL
FHEQFVQALTGAASAYASAEATNVEQQVLGLINAPTQALLGRPLIGNGADGTAANPNGGAGLLYGNNGNGFSQTTAGLTGGTGG
SAGLIGNGGNGGAGGAGANGGAGGNGWLYGSGNGGAGGAGPAGAI GAPGVAGGAGGAGGTAGLFGNGGVGGVGGDGGQGGNGA
GAGASGTKGGDAGAGGAGGAGWIHGHHGAGDGGAGGAGQASPGAPPPSPQGAGGAGGAGGRGGDGGGAGWLSGNGGDAGN
GGGGGTAGGAGNGGQFGGDGGTGGTGGTAGAGGNGRGAVLFGHGGNAGHGGAGGNGAAAGAGGEHVATAGKGGTGGVGGDGGG
GGAGGGGGLLYGNNGGAGGAGNSGGDGGTGLNAALGGNGGGGGVGGNAGAGGTGGSAGWLSGNGGAGGSSGSAGAGGAGGKGGDTP
NGLA INPGI GGGGDTGNAGNGGNGGSAARLFGGGGAGGAGGTGSTAGSGSGGTNPTGLQAAGNGGSGHAGGHGGNGGGGAGL
LGGGTTGGNGGGGGQGLGAAAGGVDGNGGNGGNGKGGDAQLVGDGGNGGNGKGGAGLIAGLDGAGGAGTRGLIFGNAGTPG
Q"
complement(1143537..1144928)
/gene="PE_PGRS20"
/locus_tag="Rv1068c"
/note="Rv1068c, (MTV017.21c), len: 463 aa. PE_PGRS20,Member of the Mycobacterium tuberculosis PE family, PGRS subfamily of gly-rich proteins (see Brennan & Delogu 2002). Similar to AL021897|MTV017_19 Mycobacterium tuberculosis H37Rv (667 aa), FASTA scores: opt: 1875, E(): 0, (55.0% identity in 667 aa overlap)."
```

CDS

```

/codon_start=1
/transl_table=11
/product="PE-PGRS family protein PE_PGRS20"
/protein_id="YP_177781.1"
/db_xref="GI:57116819 GeneID:887123"
/translation="MSYMIAVPDM LSSAAGDLASIGSSINASTRAAAAATRRLLPAAADEVSAHIAALFSGHGEGYQAIARQMAA
FHDQFTLALTSSAGAYASAEATNVEQQVLGLINAPTQALLGRPLIGNGADGTAANPNGGAGLLYGNNGNGFSQTTAGLTGGTGG
SAGLIGNGGNGGAGGAGANGGAGGNGWLYGSGNGGAGGAGPAGAI GAPGVAGGAGGAGGTAGLFGNGGAGGAGGAGGGRGG
DGGGAGWLSGNGGDAGTGGGGNAGNGGNGGSAWLSGNGGTGGGGGTAGAGGQGGNGNSGIDPNGGGQGADTGNAGNGGHGSSA
AKLFGDGGAGGAGGMSTGGTGGGGFGGGTGGNGNGHAGGAGGSGGTAGLLGSGGSGGTGGDGGNGGLGAGSGAKGNGGNGGD
GGKGGDAQLIGNGGNGGNGKGGTGLMPGINTGGAGGSRGQISGNPPTPGQ"
1164340..1166643
/gene="PE_PGRS21"
/locus_tag="Rv1087"
/experiment="EXISTENCE: identified in proteomics study"
/inference="protein motif:PROSITE:PS00583"
/note="Rv1087, (MTV017.40), len: 767 aa. PE_PGRS21, Member of the Mycobacterium
```

tuberculosis PE family, PGRS subfamily of gly-rich proteins (see citation below). Similar to Rv1090|AL021897|MTV017\_43 Mycobacterium tuberculosis H37Rv (853 aa), FASTA scores: opt: 2819, E(): 0, (59.8% identity in 860 aa overlap). Contains PS00583 pfbB family of carbohydrate kinases signature 1 near C -terminus. Predicted to be an outer membrane protein (See Song et al.,2008)."

```
/codon_start=1
/transl_table=11
/product="PE-PGRS family protein PE_PGRS21"
/protein_id="YP_177783.1"
/db_xref="GI:57116821 GeneID:887094"
/translation="MSFVVVAPEVLA AAAASDLGIGSTLAQANAALAPT TAVLAAGADEVSAAIASLFGAHGQAYQAVSAQMSA
FHAQFMQALTGAGGAYAAAEAVNVSAAQSV EQDLLA INARFERIFGRPLIGDGANGGPGQDGGPGGLLYGNGGNGGTSTTVGMA
GGNGGAAGLIGNGGFGGGGGPGAAGNGGAGGWLFNGGAGGAGGLGVAPGVPGGAGGAGGAGGVGGPAGLWGHGGAGGAGGAGV
AGAGGFEGTIGAGGAGGVGGAGGVGGAGGAGGWLYGDAGAGDGGVGGAGGTGGLGNRGGAGGAGGAGGVGGAGGAAGLWGGGGA
GGVGGTGGGAGLGAQSVTFSSSLSGLSGGDGGAGGAGGAGGAGGTGGWLYGGGGAAGSGDGGTGGQGGAGGAGVFSLFGSGGGP
GGNGGVGGVGGVGGAGGRAGLFGVGGGLGGAGGDAGDSGEGGFGGPGLAGGLFGNPNGGVGGIGGDAAGGAGGAGNGGAGGNG
GWLFGNGGAGGSGDGGAAAGRGGAGNLGSAGGINAPAGNPGSGSVGIGGAGGAGGTAGLFGDGGAGGAGGAGAAGGFFGGISAATP
SAGSEGAMGGAGGVGGNARLLCTGGAGGVGGGGGAGGDGGRGGVATPGGQGGDAGDGGAGGAGNGGGGASGAGGWLLGTGGAGGA
GGNGGNGKAGFSPGPTNFGLNGAGGGGGVGGNGATGPWLFGDGGPTPGSTGAGAAGGHGGDAQLIGNGGHGGAGGTGVPNGSGG
AGGLSGLLFGEPGANG"
```

CDS

```
1169249..1171810
/gene="PE_PGRS22"
/locus_tag="Rv1091"
/experiment="EXISTENCE: identified in proteomics study"
/note="Rv1091, (MTV017.44), len: 853 aa. PE_PGRS22, Member of the Mycobacterium tuberculosis PE family, PGRS subfamily of gly-rich proteins (see citation below). Similar to Rv1087|AL021897|MTV017_39 Mycobacterium tuberculosis H37Rv (767 aa), FASTA scores: opt: 2819, E(): 0, (60.0% identity in 860 aa overlap). Predicted to be an outer membrane protein (See Song et al., 2008). This region is a possible MT-complex-specific genomic island (See Becq et al.,2007)."
```

```
/codon_start=1
/transl_table=11
/product="PE-PGRS family protein PE_PGRS22"
/protein_id="YP_177786.1"
/db_xref="GI:57116826 GeneID:885258"
/translation="MSFVIAAPEALVAVASDLGIGSALAEANAALAPT TALLAAGADEVSAAIAALFGAHGQAYQTVSAQASA
FHAQFVQALTGGGGAYAAAEANVSAAQSTDQRLLDLINGPTQALLGRPLIGDGANGGPGQDGGPGGLLYGNGGNGGTSTTAGVA
GGNGGAAGLIGNGGAGGGGGAGAAGNGGAGGWLYGNGGAGGAGGTSVIPGVAGNGGAGGSAGLWGTGGAGGDGGNRSRGPVNV
AGSAGNGGAGGAAGLFGDAGAGNGGKGGAGGAAFSINFTAGDGGAGGAGGSGGHALLWGAGGAGNGGSGGTGGAGGSTAGAG
GNGGAGGGGTGGLLFGNGGAGGHGAAAGNLAAGNVSSSSGGGAGGTGGAGGDGGAGGAGGNARLWGVGGAGGAGGDGGAGGA
GGKGGSLSGNANGGAGGDSGRGGTGGAGGEGGAAGLLVGTGGHGGDGGAGGAAVKGGDGGAAAGTGIAGAGGRGGAGGSGGSGG
DGGGGAAGPAGWLFGDGGAGNGGAAAAGGAGGQAGGGGGNGGNGGNGGNGGATGGWLYGNGGAGGQGATAGAGGAGANG
VSSTNNGGTGGNGGIGGTGGSGGAGGNAGLLGVGGAGGHGASGGAGDRGGAGGTGFISSDGGAGGDGGDGGNGGAGGTGGLLFGA
GGNGGPGGSGGAADIGNGGAGNGGTDGNGGNGGSGGAGSGDGGGAGGNGAWLFGNGGAGGGGGKGGNGAGGGLGGGSGFLP
GLNGSGDGGDGGNGAPGGVLYGNGGAGGQSSGGIGGPGATGGAGGKGGDGGDAQLIGDGGNGGNGGAGGTGCTPGPGGPGGSG
GLGGLLFGQTGTAGVSP"
```

CDS

```
complement(1333695..1335383)
/gene="PE_PGRS23"
/locus_tag="Rv1243c"
/experiment="EXISTENCE: identified in proteomics study"
/note="Rv1243c, (MTV006.15c), len: 562 aa. PE_PGRS23, Member of the Mycobacterium tuberculosis PE family, PGRS subfamily of gly-rich proteins (see Brennan & Delogu 2002)."
```

```
/codon_start=1
/transl_table=11
/product="PE-PGRS family protein PE_PGRS23"
/protein_id="YP_177798.1"
/db_xref="GI:57116845 GeneID:887109"
/translation="MEYLIAAQDVLVAAAADLEGIGSALAAANRAAEAPT TGLLAAGADEVSAAIASLFSGNAQAYQALSAQAAA
FHQQFVRALSSAAGSYAAEAANASPMQAVLDVNVNGPTQLLLGRPLIGDGANGGPGQNGGDGGLLYGNGGNGGSSSTPGQPGGRG
GAAGLIGNGGAGGAGGPGANGGAGGNGGWLYGNGGLGGNGGAATQIGGNGGNGGHGCGNAGLWNGGAGGAGAAGAAGANGQNPVS
HQVTHATDGDGTTGPDGNGTDAGSGSNVAVNPGVGGGAGGIGGDGNTLQGTVDVSGAGGDGGDANFASGGAGGNGGAAQSGFGD
AVGNGGAGGNGGAGGGGGLGGAGGSANVANAGNSIGGNGGAGGNGGIGAPGGAGGAGGNANQDNPPGGNSTGGNGGAGGDGGVG
ASADVGGAGGFGGSGRGLLLGTGGAGGDGGVGGDGGIGAQGGSGGNGGNGGIGADGMANQDGDGGDGGNGGDGGAGGAGGVGG
NGGTGGAGGLFGQSGSPGSGAAGGLGGAGGNGGAGGGGGTGFNPGAPGDPGTQGATGANGQHGLNG"
```

CDS

```
complement(1436860..1438671)
/gene="PE_PGRS24"
/locus_tag="Rv1325c"
/experiment="EXISTENCE: identified in proteomics study"
```



/note="Rv1325c, (MTCY130.10c), len: 603 aa. PE\_PGRS24,Member of the Mycobacterium tuberculosis PE family, PGRS subfamily of ala-, gly-rich proteins (see Brennan & Delogu 2002), similar to many e.g. YQ04\_MYCTU|P71933 hypothetical 63.1 kDa glycine-rich protein (778 aa), FASTA scores: E(): 0, (52.3% identity in 724 aa overlap). Predicted to be an outer membrane protein (See Song et al., 2008)."  
/codon\_start=1  
/transl\_table=11  
/product="PE-PGRS family protein PE\_PGRS24"  
/protein\_id="YP\_177799.1"  
/db\_xref="GI:57116848 GeneID:886899"  
/translation="MSFVIAAPELTVRAASDLANIGSTLGAANAAALGPTTELLAAGADEVSAAIASLFAAHGQAYQAVSAQMSA  
FHAQFVQFTTAGAGAYASAEAAAAAPLEGLLNIVNTPQQLLGRPLIGNGANGAPGTGQAGGAGGLLYGNGGAGGSGAPGQAGGP  
GGAAGLFGNGGAGGAGGDGPGNGAAGGAGGAGGLLFGSSGAGGPGGVGNTGTGGLGDDGGAAGLFGAGGIGGAGGPGFNGGAGGA  
GGRSGLFEVLAAGGAGGTGGLSVNGGTGGTGGTGGGGGLFSNGGAGGAGGFVSVGSAGGNGGTGGDGGIFTGNGGTGGTGGTGTG  
NQLVGGEGGAGGAGGNAGILFGAGGIGGTGGTGLGADPDGGTGGKGGVGGIGGAGALFGPGGAGGTGGFGASSADQMAGGIGGSG  
GSGGAAKLIGDGGAGGTGGDSVRGAAGSGGTGGTGGGLIGDGGAGGAGGTGIEFGSVGGAGGAGGNAAGLSGAGGAGGAGGFETA  
GDGGAGGNAGLLNGDGGAGGAGGLGIAGDGGNGGKGGKAGMVGNNGDGGAGGASVVANGGVGGSSGNATLIGNGNGGNGGVGSA  
PGKGGAGGTAGLLGLNGSPGLS"

CDS

complement(1518022..1519752)  
/gene="PE\_PGRS25"  
/locus\_tag="Rv1396c"  
/inference="protein motif:PROSITE:PS00017"  
/note="Rv1396c, (MTCY21B4.13c), len: 576 aa. PE\_PGRS25,Member of the Mycobacterium tuberculosis PE family, PGRS subfamily of gly-rich proteins (see Brennan & Delogu 2002),strong similarity to many e.g. glycine rich protein MTCY130.10C|E245019 (603 aa), FASTA scores: opt: 1945, E(): 0, (57.5% identity in 619 aa overlap). Contains PS00017 ATP/GTP-binding site motif A, similar to other PGRS-type sequences. This region is a possible MT-complex-specific genomic island (See Becq et al., 2007)."

/codon\_start=1  
/transl\_table=11  
/product="PE-PGRS family protein PE\_PGRS25"  
/protein\_id="YP\_177809.1"  
/db\_xref="GI:57116861 GeneID:886745"  
/translation="MSFLFAQPEMLGAAATDLASIGSAISTANAAAAAATTRVLAAGADEVSAAVAALFSGHAQTYQALRTQAAA  
FHQQIVQTLTSTAGAYASAEANVEQQLLGAINAPTMLLGRPLIGHGADGAPGTGQAGGAGGILYNGNGGSGATGQAGGAGG  
AAGLIGHGGAGGLGGTGAAGGAGGAGGWLWNGGAGGNGVGVVAGDPPGGVGGAGGAGGAAGLWGGSGGSGGTGGQGGVGGGKSGDG  
GTGGIGGAGGGGGWLHGDGGAGGHGGQGGTGVSSGNGGAGGTGGDGRGLSGSGAGGRGGQTGVGGKVENNFPGGAGGAGGTGG  
LIGNGGAGNGGQGAISGAGGAGGNAWLIGDGGAGNGGDIRQGGGAGGAGGAGQLIGNGGTGGAGGTVTSFNLGGAGGAGG  
SAGLIGHGGTGGAGGHSAGQPDGNGGIGGAGGAGNGGQLYGTGGTGGTGGKGGDFGVFGKGGAGGTGGRGGAAGLIGDAGTGG  
TGGKGGTAGEDGTGGNGGTGGNGGAAVLIGNGGGGAGNGGAGNDGTPGNGGGGGVGGTGGTLFGQPQPGPPQPGPA"

CDS

complement(1564104..1565579)  
/gene="PE\_PGRS26"  
/locus\_tag="Rv1441c"  
/note="Rv1441c, (MTCY493.13), len: 491 aa. PE\_PGRS26,Member of the Mycobacterium tuberculosis PE family, PGRS subfamily of gly-rich proteins (see Brennan & Delogu 2002),similar to Y0DP\_MYCTU|Q50615 hypothetical glycine-rich 40.8 kDa protein (498 aa), fasta scores: opt: 1625, E(): 0,(55.2% identity in 518 aa overlap)."

/codon\_start=1  
/transl\_table=11  
/product="PE-PGRS family protein PE\_PGRS26"  
/protein\_id="YP\_177811.1"  
/db\_xref="GI:57116864 GeneID:886626"  
/translation="MSNVMVVPGMLSAAAADVASIGAALSANGAAAPT TAGVLAAGADEVSAAIASLFSGYARDYQALSAQMAR  
FHQQFVQALTASVGSYAAAEANASPLQALEQQVLAALINAPTQTLGRPLIGNGADGLPGQNGGAGGLLWNGGNGGAGDAHPN  
GGNGGDAGMFGNGGAGGAGYSPAAGTGAAGGAGGAGGAGWLSGNGGAGGNGGTGASGADGGGGLPPVPASPNGGGGGDAGGAA  
GMFGTGGAGGTGGDGGAGGAGDSPNSGANGARGDGGNGAAGGAGGRLFGNGGAGGNGGTAGQGGDGGTALGAGGIGDGGTGG  
GGTGGTAGIGSSAGAGGAGGAGGAGGTGGGSSMIGKGGTGGNGGVGGTGGASALTIGNGSSAGAGGAGGAGGTGGTGGYIESL  
DGKGGQAGNGGNGGAAGGAGGGGTGAGGNGGAGGNGDGGPSQGGGNPFGGDDGGTGGPGGVGVPDGGIGGANGAQGKHG"

CDS

complement(1576533..1580522)  
/gene="PE\_PGRS27"  
/locus\_tag="Rv1450c"  
/note="Rv1450c, (MTCY493.04), len: 1329 aa. PE\_PGRS27,Member of the Mycobacterium tuberculosis PE family, PGRS subfamily of gly-rich proteins (see Brennan and Delogu,2002), similar to Y03A\_MYCTU|Q10637 hypothetical glycine-rich 49.6 kDa protein (603 aa), fasta scores: opt: 2112, E(): 0, (56.5% identity in 630 aa overlap)."  
/codon\_start=1  
/transl\_table=11  
/product="PE-PGRS family protein PE\_PGRS27"  
/protein\_id="YP\_177812.1"

CDS

```

/db_xref="GI:57116865 GeneID:886605"
/translation="MSLVIVAPETVAAAALDVARIGSSIGAANAAGSTTSVLAAGADEVSAAIATLFGSHAREYQAISTQVAA
FHDRFAQTLTSAAVGSYVSAEATNAAPLATLEHNVNLNALNAPTQALLGRPLIGDGAAGAPGTGQAGGAGGILWNGGAGGSGAPGQ
VGGAGGAAGLFGTGGAGGAGGAGAAGGAGGSGWLLNGGVVGGAGGQSLGGATGGAGGNAGLFGVGGTGGPGGPGGPGVGGT
GAGGLGTTLYGAGGHGGAGGPGPIGGVGGHGGVGAAGLLGVGGHGGAGGHGAEGVAGAAGEDLSPHGTSGGVGGDAGDGGTGR
GGWLAGAGGAGGAGGVTGGAGGAGFSRALIVAGDNGGDPGAGGAGGTGGAGSTIGAHGAAGASPTSGGNGGAGGNGAHFSSGG
KAGNGGAGGAGGLVNGGAGGAGGNGAPAPPSSGDPNNGGGGAGGAGGKGGDGAQAGDGGAGGAGGKGGNGGNGATGATGLN
GLGAGADGTDGKGGNGGAGGGGAGGQGGKALAATHQDGSMDGAGGAGGNGGAGGMMGGDGGNGAKGTFDNGGDVGGNGGNGGSR
GIGGAGGIGGAGSTAGADGARGATPTSGGNGGTGGNGANATVAGGAGGAGGKGGNGGLVNGGAGGKGGDMAGVAGSSPTTAGE
SGTSGQNGGAGGAGGAGGRGGDFGGDGGTGGAGGNGANGANATTPGAKGGDGGHGGPGAQGGNGGQGGPGGLAGNLFQNGIQGV
GSGGKGGAGGLAGDGGNGANGNFAGFDGNGGGHGGNGNPGAGGQGGSGGAGSTPGAKGAHGFTPTSGGDGGDGGNGGNSQVVG
NGDGGNGGNGSAGTGGNGRGGDGAFFGMSANATNPGENGPNGNPGGNGGAGGAGGLNNGGNGAGNGGLGGFFGNGAAGA
NGVAVGAPQPGGAGGHGGAGGNGGAGGNGGQGVVSDGAGGAGGAGDGGAPGDGANGGNGQAGAFAGGGGRRGGDGGNAGNAG
AGGPGGTGSTAGKAGPAGSILHDGGNGGHGGHGAASGGNGGPGGHGGNGGNGGTGANGGNGGIGGTGGAGSTGAKGVLGTNEGDG
GDGGRGNGGRGGNGGQGLTGAGGNGGTGGTNGGNGGNGASGDLVTPGDGGGGRRGGDAGRGGDAGLGGSSGPGGTGPDWGT
GGTGGTGGTGGQGANGLTGRGGTGGNGGNGTGGTGGAGGTGGTGHNGSQPMGGNGGAGGFFGNGFAGVGGRRGMMGGSGGTG
GTGDAGPFGTGTGGTGGHGGQGGGGFSILLGLGLGLGSPGSIATGTAGGAGGGGGFGLGGGEFV"

```

```

complement(1581899..1584124)
/gene="PE_PGRS28"
/locus_tag="Rv1452c"
/note="Rv1452c, (MTCY493.02), len: 741 aa. PE_PGRS28,Member of the Mycobacterium
tuberculosis PE family, PGRS subfamily of gly-rich proteins (see Brennan and
Delogu,2002), similar to Y03A_MYCTU|Q10637 hypothetical glycine-rich 49.6 kDa protein
(603 aa), fasta scores: opt: 2090, E(): 0, (56.3% identity in 641 aa overlap)."
/codon_start=1
/transl_table=11
/product="PE-PGRS family protein PE_PGRS28"
/protein_id="YP_177813.1"

```

CDS

```

/db_xref="GI:57116866 GeneID:886595"
/translation="MSLVIVTPETVAAAASDVARIGSSIGVANSAAAGSTTSVLAAGADEVSAAIATLFGSHAREYQAISTQVAA
FHDRFAQTLTSAAVGSYVSAEATNAAPLATLEHNVNLNALNAPTQALLGRPLIGDGAAGAPGTGQAGGAGGILWNGGAGGSGAPGQ
VGGAGGAAGLFGTGGAGGAGGAGAAGGAGGSGWLLNGGVVGGAGGQSLGGATGGAGGNAGLFGVGGTGGPGGPGGPGVGGT
GAGGLGTTLYGAGGHGGAGGPGPIGGVGGHGGVGAAGLLGVGGHGGAGGHGAEGVAGAAGEDLSPHGTSGGVGGDAGDGGTGR
GGWLAGAGGAGGAGGVTGGAGGAGFSRALIVAGDNGDGGNGMGGAGGAGGPGGAGGLISLLGGQAGGAGGTGGAGGVTGGD
RGAGGPNQAFNAGAGGAGGHGGDPGAGGAGGTGGAGSITGAQQAIGATPTSGGNGGAGGNGANATTAGTNGANGGPGHGGGLV
NGGAGGNGANGAAGTNASDSGAVGGKNGSGGNGGQGGAGGTLGAGGAGGTGGRGADGGGLGGSGAEGANATTAGGERQDGGK
GGNGVGGTGGNAVAPGANGHGGNGGPNPFGSAGGLGGLSGDGVTRAAQGATPDFADTGGKGGNGGNGANAVAPGGTGASGGAG
GNAGAGGKGGENIIGDGGGNGGAGGKGGAGTLLGLTVFGDNGGAGVLGDSTDPDGGGAGGAGGAGGAGDPTI"

```

```

complement(1601504..1602616)
/gene="PE_PGRS29"
/locus_tag="Rv1468c"
/experiment="EXISTENCE: identified in proteomics study"
/note="Rv1468c, (MTV007.15c), len: 370 aa. PE_PGRS29,Member of the Mycobacterium
tuberculosis PE family, PGRS subfamily of gly-rich proteins (see citation below)."
/codon_start=1
/transl_table=11
/product="PE-PGRS family protein PE_PGRS29"
/protein_id="YP_177814.1"

```

CDS

```

/db_xref="GI:57116869 GeneID:886556"
/translation="MSFVVANTEFVSGAAGNLARLGSMSISAANSAAAQTTAVAAAGADEVSAAVAALFGAHGQTYQVLSAQAAA
FHSQFVQALSGGAQAYAAAATNFGPLQPLFDVINAPTLLLRPLIGNADGTAANPNQAGLLIGNGGNGFSPAAGPGGNGG
AAGLLGHGGNGGVGALGANGGAGGTGGWLFNGGAGGNSGGGGGAGGIGGSAVLFAGGAGGISPNMGAGGSGGNGGLFFGNGG
AGASSFLGGGAGGRAFLFGDGGAGGAALSAGSAGRGGDAGFFYFNGGAGGSGAGGASSAHGGAGGQAGLFGNGGEGGDGGALGG
NGGNGNAQLIGNGGDGGGAGAPGLGRRGGLLLGLPGANGT"

```

```

complement(1806205..1809240)
/gene="PE_PGRS30"
/locus_tag="Rv1651c"
/experiment="EXISTENCE: identified in proteomics study"
/note="Rv1651c, (MTCY06H11.16c), len: 1011 aa. PE_PGRS30,Member of the Mycobacterium
tuberculosis PE family, PGRS subfamily of gly-rich proteins (see citations
below),similar to many e.g. Q10637|Y03A_MYCTU hypothetical glycine-rich 49.6 kd
protein (603 aa), FASTA scores: opt: 1757, E(): 0, (50.8% identity in 714aa overlap).
The transcription of this CDS seems to be activated in macrophages (see Ramakrishnan
et al., 2000)."
/codon_start=1
/transl_table=11
/product="PE-PGRS family protein PE_PGRS30"
/protein_id="YP_177826.1"
/db_xref="GI:57116897 GeneID:885174"

```

```
/translation="MSFLLVPEPDLVTA AAAANLAGIR SALS EAAAAASTPTTALASAGADEV SAAVSR LFGAYGQQFQALNARAAT
FHAEFVSL L N G G A A A Y T G A E A A S V S S M Q A L L D V A N A P T Q T L L G R P L I G N G A D V A G T G S N A G G N G G P G G I L Y N G G N G G A G G N G G
A A G L I G N G G A G G A G G A G G A G G A G G T G G L L Y G N G G A G G N G G S A A A A G G A G G N A L L F G N G G N G G S G A S G G A A G H A G T I F G N G G N
A G A G S G L A G A D G G L F G N G G D G G S S T S K A G G A G G N A L F G N G G D G G S S T V A A G G A G G N T L V G N G G A G G A G G T S G L T G S G V A G G A G G S
V G L W G S G G A G G D G G A A T S L L G V M N A G A G G A G G N A G L L Y G N G G A G G A G G N G D T T V P L F D S G V G G A G G A G G N A S L F G N G G T G G V G
G K G G T S S D L A S A T S G A G G A G G A G G V G G L L Y G N G G N G G A G G I G G A A I N I L A N A G A G G A G G A A G S S F I G N G G N G G A G G A G G A A L F S
S G V G G A G G S G G T A L L L G S G G A G G N G G T G G A N S G S L F A S P G G T G G A G G H G G A G G L I W G N G G A G G N G G N G G T T A D G A L E G G T G G I G G
T G G S A I A F G N G G Q G G A G G T G G D H S G N G I G G K G G A S G N G G N A G Q V F G D G G T G G T G G A G G A G S G T K A G G T G S D G G H G G N A T L I G N G
G D G G A G G A G G A G S P A G A P G N G G T G G T G G V L F G Q S G S S P P G A A A L A F P S L S S S V P I L G P Y E D L I A N T V A N L A S I G N T W L A D P A P F
L Q Q Y L A N Q F G Y G Q L T L T A L T D A T R D F A I G L A G I P P S L Q S A L Q A L A A G D V S G A V T D V L G A V V K V F V S G V D A S D L S N I L L L G P V G D L
F P I L S I P G A M S Q N F T N V V M T V T D T T I A F S I D T T N L T G V M T F G L P L A M T L N A V G S P I T T A I A F A E S T T A F V S A V Q A G N L Q A A A A A L
V G A P A N V A N G F L N G E A R L P L A L P T S A T G G I P V T V E V P V G G I L A P L Q P F Q A T A V I P V I G P V T V T L E G T P A G G I V P A L V N Y A P T Q L A
Q A I A P "
```

CDS

```
1938967..1940823
/gene="PE_PGRS31"
/locus_tag="Rv1768"
/experiment="EXISTENCE: identified in proteomics study"
/note="Rv1768, (MTCY28.34), len: 618 aa. PE_PGRS31, Member of the Mycobacterium tuberculosis PE family, PGRS subfamily of gly-rich proteins (see Brennan and Delogu, 2002), highly similar to Q50615 hypothetical 40.8 kDa protein (498 aa),FASTA scores: opt: 1703, E(): 0, (57.4% identity in 566 aa overlap)."
```

```
/codon_start=1
/transl_table=11
/product="PE-PGRS family protein PE_PGRS31"
/protein_id="YP_177832.1"
/db_xref="GI:57116908 GeneID:885429"
/translation="MSYLVVVPELVAAAATDLANIGSSISAANAAAAAPTALVAAGGDEVSA AIAALFGAHARAYQALSAQAAM
FHEQFVRALAAGGNSYAVAEAAATQSVQD L L N L I N A P T Q A L L G R P L I G N G A N G L P G T G Q N G G D G G I L Y N G G N G G S G G V N Q A G G
N G N A G L W N G N G S G G A G G N A T T A G R N G F N G G A G G S G L L W N G G A G G A G G N G P A P L V G G V G T T G G A G G N G G A G L F Y G F G G A G G
N G M G G V A P S T G P S M G I L P A G G V G G P G G S G G A S A L A F G S G G V G G A G G L G G P T D G T V Q V G G F G G Q G G N G G Q S G L L F G N A G A G G A G
A A G G A G T G D T E S F G G H G G A G G D G G A V G L I G N G G A G G T G S P G A V V G N G G V G G L G G A G S P G G L L Y G T G G A G G N G P G D G G T G A T V
G F A G S G G F G G A G G I A Q L F G T G M G S G G G I G A G T T T V V P P D V A P V G G T G G N G R A G L L L G V G M G M G N G G A T S V G G T L Y A A G N G G
D G G L V W N G G T G G S G G A G G A G S V G N G G A G G N A A L L F G N G G A G G A G G I G A G G A G G F G A V L F G N G G A G G S G A P G G I G A G G N G N
A L L V G N G G N G G A G T G G A A G G A G G S G L L F G Q N G M P G P "
```

CDS

```
complement(1975311..1977230)
/gene="PE_PGRS32"
/locus_tag="Rv1803c"
/experiment="EXISTENCE: identified in proteomics study"
/inference="protein motif:PROSITE:PS00583"
/note="Rv1803c, (MTV049.25c), len: 639 aa. PE_PGRS32,Member of the Mycobacterium tuberculosis PE family, PGRS subfamily of gly-rich proteins (see citation below). Most similar to Rv1768|MTCY28.34|Z95890 (618 aa), FASTA scores: opt: 1827, E(): 0, (53.5% identity in 664 aa overlap). Contains two PS00583 pfkB family of carbohydrate kinases signatures 1. Predicted to be an outer membrane protein (See Song et al., 2008)."
```

```
/codon_start=1
/transl_table=11
/product="PE-PGRS family protein PE_PGRS32"
/protein_id="YP_177842.1"
/db_xref="GI:57116918 GeneID:885730"
/translation="MWTSQMIVAPAFVDAAAKDLATIGSAISRANAELVPITALLPAGADDVSA AIAALFATHGQAYQELSAHA
VAFHEQFVQLMSAGAAQYASAEAA NS S P L Q I V G Q T A L D A I N S P V Q T L T G R P L I G N G A N G V A G T G Q N G G D G G W L Y N G G N G G S G G T
G Q N G N G S A G L W G S G G N G G Q G A G A N G A A G Q P K A G D A G S G G N G G A G G W I Y G H G H G G A G G N G N A T A P G G A S A G F D G G A G G N G S
G G R G L L F G N G G N G S V G M G G Q G T N D T A G D S A G S G L L G N G G N G A Q G G W L I G N G G Q G D S A G G G T D S T Q T G V M N G A S G S G A I A
N G G D A G L V G N G G A G G N G G N G A A G S A L G T T I F G G S G V G G S G D G G N G G W L F G S G A S G G N G G Q G G D A G T N G F A G F G S A G G G W V
G A V N F G P I S V Q G F L F G H G D G G N G G D V G A G S L S I Q F G A S G G D G G Q G G V L Y N G G N G N A G S G G T G F E G S A Q G G A A I L I G N G G
A G G N A T G G T G V G N I I Q E A G G D S D G G A G G S G L L F G S G G A G G I G G A G G V G G S G N D G G N G D G G Q G G A S G L I G N G G P G G S G G T G
G A G G T G S A G T G G A G G D G G N A A L L I G T G G D G G D V P P A P G Q G G K G G L I G L P G Q N Q P "
```

CDS

```
complement(1987729..1989225)
/gene="PE_PGRS33"
/locus_tag="Rv1818c"
/inference="protein motif:PROSITE:PS00583"
/note="Rv1818c, (MTCY1A11.25), len: 498 aa. PE_PGRS33,Member of the Mycobacterium tuberculosis PE family, PGRS subfamily of gly-rich proteins, similar to many. Contains 2 x PS00583 pfkB family of carbohydrate kinases signature 1. Supposedly localised to the cell surface (see citations below)."
```

```
/codon_start=1
/transl_table=11
/product="PE-PGRS family protein PE_PGRS33"
```

```

/protein_id="YP_177846.1"
/db_xref="GI:57116923 GeneID:885551"
/translation="MSFVVVTIPEALAAVATDLAGIGSTIGTANAAAAVPTTTVLA AAAADEVSAAMAALFSGHAQAYQALSAQAAL
FHEQFVRALTAGAGSYAAAEASAAPLEGVLDVINAPALALLGRPLIGNGANGAPGTGANGDGGILIGNGGAGGSGAAGMPGGN
GGAAGLFGNGGAGGAGGNVASTAGTGFAGGAGGLLYGAGGAGGAGGRAGGTVGGIGGAGGAGNGLLFGAGGAGGVGGLAADA
GDGGAGGDGGLFFGVGGAGGAGGTGTNVTGGAGGAGNGLLFGAGGVGGVGGDVAFLGTAPGGPGGAGGAGGLFGVGGAGGAG
GIGLVGNGGAGGSGSALLWGDGAGGAGGVGSTTGGAGGAGGNAGLLVGAGGAGGAGALGGGATGVGGAGGNGGTAGLLFGAGG
AGGFVGGAGGAGGLGKAGLIGDGGDGGAGNGTGAKGGDGGAGGGAILVGNNGNGNAGSGTTPNGSAGTGGAGGLLKGNGMNG
LP"
CDS complement(2014522..2016069)
/gene="PE_PGRS34"
/locus_tag="Rv1840c"
/note="Rv1840c, (MTCY359.33), len: 515 aa. PE_PGRS34,Member of the Mycobacterium
tuberculosis PE family, PGRS subfamily of gly-rich proteins (see citation below).
Similar to many e.g. Y03A_MYCTU|Q10637 hypothetical glycine-rich 49.6 kDa protein
(603 aa), FASTA scores: opt: 1693, E(): 0, (53.1% identity in 612 aa overlap); etc."
/codon_start=1
/transl_table=11
/product="PE-PGRS family protein PE_PGRS34"
/protein_id="YP_177847.1"
/db_xref="GI:57116924 GeneID:885753"
/translation="MSFVVAAPEVVVAAAASDLAGIGSAIGAANAAAAVPTMGVLAAGADEVSAAVADLFGAHAQAYQALSAQAAL
FHEQFVHAMTAGAGAYAGAEADAALDVLNPPFQALFGRPLIGDANGAPGQPGGPGLLYGNNGNGNGGIGQPPGAGGDAGL
IGNGGNGGIGGPGATGLAGGAGGVGGLLFGDGGNGGAGGLGTGPVGTGGIGGPGAAVGLFGHGGAGGAGGLKAGFAGGAGGT
GGTGGLLYGNNGNGGNVPSGAADGGAGGDARLIGNGGDGGSVGAAPTIGINGNGNGNGWLYGDGGSGGSLQGFSDGGTGGNAG
MFGDGGNGGFSFFDGNNGDGGTGGTLIGNGGDGGNSVQTDGFLRGHGGDGGNAVGLIGNGGAGGAGSAGTGVFAPGGGSGGNGGN
GALLVGNNGGAGGSGGPTQIPSVAVPVTGAGGTGGNGGTAGLIGNGGNGGAAGVSGDGTPTGTGGNGGYAQLIGDGGDGGPGDSGGP
GGSGGTGGTLAGQNGSPGG"
CDS 2145451..2147127
/gene="PE_PGRS35"
/locus_tag="Rv1983"
/experiment="EXISTENCE: identified in proteomics study"
/inference="protein motif:PROSITE:PS00141"
/note="Rv1983, (MTCY39.36c), len: 558 aa. PE_PGRS35, Member of the Mycobacterium
tuberculosis PE family, PGRS subfamily of gly-rich proteins (see Brennan & Delogu
2002). Similar to other PE proteins e.g. Rv0977, etc. Contains PS00141 Eukaryotic and
viral aspartyl proteases active site."
/codon_start=1
/transl_table=11
/product="PE-PGRS family protein PE_PGRS35"
/protein_id="YP_177854.1"
/db_xref="GI:57116933 GeneID:885921"
/translation="MSFLVVPEFLTSAAADVENIGSTLRAANAAAAASTTALAAAGADEVSAAVAALFARFGQEQAVSAQASA
FHQQFVQTLNSASGSYAAAEATIASQLQTAQHDLGAVNAPTETLLGRPLIGDAPGTATSPNGGAGGLLYGNNGNGYSATASGV
GGGAGSAGLIGNGGAGGAGPNAPGGAGGNGGWLGNNGIGGPGGASSIPGMSGGAGGTGGAAGLLGWGANGGAGGLDGDVGVVD
RGTGGAGGRGGLLYGGYGVSGPGGDGRTPLEI IHVTEPTVHANVNGGPTSTILVDTGSAGLVVSPEDVGGILGVLHMGLPTGLS
ISGYSGLLYIFATYTTTVDVFNNGIVTAPTAVNVVLLSIPTSPFAISTYFSALLADPTTTPFEAYFGAVGVVDVGLVGPNAVGP
PSIPTMALPGDLNQGVLIDAPAGELVFGPNPLPAPNVEVVGSPITTLVVKIDGGTPIPVPSSIIDSGGVTGTIPSVYIGSGTLPAN
TNIEVYTPGGDRLYAFNTNDRPTVISSGLMNTGFLPFRFQPVYIDYSPSGIGTTVFDHPA"
CDS complement(2304255..2305025)
/gene="PE_PGRS37"
/locus_tag="Rv2126c"
/experiment="EXISTENCE: identified in proteomics study"
/note="Rv2126c, (MTCY261.22c), len: 256 aa. PE_PGRS37,Possible PE_PGRS pseudogene
fragment, similar to the Gly-rich C-terminus of many members of the Mycobacterium
tuberculosis PGRS family."
/codon_start=1
/transl_table=11
/product="PE-PGRS family protein PE_PGRS37"
/protein_id="YP_177862.1"
/db_xref="GI:57116949 GeneID:887791"
/translation="MIGDGANGGPGQPGGPGLLYGNNGHGGAGAAGQDRGAGNSAGLIGNGGAGGAGNGGIGGAGAPGGLGGD
GGKGGFADEFTGGFAQGGRRGGFGNGNTGASGGMGGAGGAGGAGGAGGLLIGDGGAGGAGGIGGAGGVGGGGGAGGTGGGGVASA
FGGNAFVGGGGDGGDGGDGGTGGAGGARGAGGAGGAGWLSGHSAGHAMGSGGEGGAGGGGGGARGEAGAGGGTSTGTNPGKAG
APGTQGDSDPGPPP"
CDS complement(2340293..2341891)
/gene="PE_PGRS38"
/locus_tag="Rv2162c"
/experiment="EXISTENCE: identified in proteomics study"

```

/note="Rv2162c, (MTCY270.06), len: 532 aa. PE\_PGRS38, Member of M. tuberculosis PE\_PGRS family (see citations below). FASTA score: Y03A\_MYCTU Q 10637 hypothetical glycine-rich 49.6 kDa protein (603 aa) op t: 1798 z-score: 1220.0 E(): 0; (55.4% identity in 590 aa overlap). This region is a possible MT-complex-specific genomic island (See Becq et al., 2007)."

/codon\_start=1

/transl\_table=11

/product="PE-PGRS family protein PE\_PGRS38"

/protein\_id="YP\_177865.1"

/db\_xref="GI:57116953 GeneID:887300"

/translation="MSFVIAAPEVMAAAATDLANIGSSISAASAAAAGPTMGILAAGADEVSVVAISALFGSHAQGYQTLQAQLAA  
YHNQFVRALNAGAGSYASAEANVQQTLLNAINAPTQTLLGRPLIGNGADGGPQNGGPGGLLYGNGGNGGAGDTANPNGNGGS  
AGLIGNGGAGGAGAATGAGGAGNGGWLYGNGGPGGAAGLGTAGGVSPAGGAGGAAGLWGHGGAGGAGGSASGAPGAGGAGGDDG  
RGLLLYGDGAGGAGGNGSNGVTGVHGGNGGAGGAAGLIGNGGAGGDDGNGGLSNTGASGGAGGAGGAALIGNGGDGGHGGNGGH  
GNSGGAGGAGGAGGAGGAGGHVGLIGNGGNGGAGGNGNDNSSTLADAGSGGAGAAGNGGLFYGNGGVGGRGNGGFFSSAGTSG  
GDDGIGGAGGIGGLIGSGGGGDDGNGGQAPTGNAGDGGAGGNARLIGDGGRRGNGGEGGDDGPPGVKGDGNGGNGGNAVVIGN  
GGNGGAGGFGIPVSGGAGGSRGVLFGTTPGANGADG"

complement(2534720..2535961)

/gene="PE\_PGRS39"

/locus\_tag="Rv2340c"

/experiment="EXISTENCE: identified in proteomics study"

/note="Rv2340c, (MTCY98.09c), len: 413 aa. PE\_PGRS39, Member of the Mycobacterium tuberculosis PE\_family, PGRS subfamily of gly-rich proteins (see citations below), similar to others eg YI18\_MYCTU|Q50615|Rv1818c|MTCY1A11.25 PE-PGRS family protein from Mycobacterium tuberculosis (498 aa), FASTA scores: opt: 710, E(): 1.4e-22, (41.0% identity in 368 aa overlap); O53884|Rv0872v|MTV043.65c PGRS-family protein from Mycobacterium tuberculosis (606 aa), FASTA scores: opt: 708, E(): 1.9e-22, (42.4% identity in 389 aa overlap); etc. This region is a possible MT-complex-specific genomic island (See Becq et al., 2007)."

/codon\_start=1

/transl\_table=11

/product="PE-PGRS family protein PE\_PGRS39"

/protein\_id="YP\_177869.1"

/db\_xref="GI:57116973 GeneID:888961"

/translation="MSHVTAAPNVLAASAGELAAIGSTMRAANAAAAAPTAGVLAAGDDVVSAGIAALFGARAQAYQAI SAQAAL  
FHDRFVQILQEGAAAYAMAEANALPLQKAQGVVSELAQDRTGGTGTGQSRGAGFGVGVQAGGKGDGDP IGVQVGEQHGAGQ  
LGSTDGNPGVAGAAHSGVSAHSGSGATGAAGVADPGSGAGVGSAAAGNGTGAGSADAVGGAGTGRDIVGSVRGDGGVGMASGDG  
GLSTGAAGASAEGGLMPGFGGAPVWVGHWGLGGEHSGAIGGVGEQVAPAVATAPAVSPATTSAAVAEESGSTPATKAQAMHATTN  
PGNAAHQGNPADPGNSARRADGGRDEQLLLLPLTSLRGLRHTLKKLSGLRARNGLLTASGDNASGSRPWDRDQLLRALGLRPPG  
HE"

2564717..2564902

/gene="PE\_PGRS40"

/locus\_tag="Rv2371"

/note="Rv2371, (MTCY27.09c), len: 61 aa. PE\_PGRS40, Short protein, member of the Mycobacterium tuberculosis PE family, PGRS subfamily of gly-rich proteins (see citation below), highly similar to N-terminal part of others e.g. AAK44356|MT0132 PE\_PGRS family protein from Mycobacterium tuberculosis strain CDC1551 (561 aa), FASTA scores: opt: 217, E(): 4.9e-08, (69.65% identity in 56 aa overlap); etc."

/codon\_start=1

/transl\_table=11

/product="PE-PGRS family protein PE\_PGRS40"

/protein\_id="YP\_177875.1"

/db\_xref="GI:57116979 GeneID:885141"

/translation="MSLVSVAPELVVTAVPDVARIGSSIGAPDTAAARPTT SVLAAGADEVSADVV ALFGVVAR"

2605763..2606848

/gene="PE\_PGRS41"

/locus\_tag="Rv2396"

/gene\_synonym="aprC"

/inference="protein motif:PROSITE:PS00583"

/note="Rv2396, (MTCY253.25c), len: 361 aa. PE\_PGRS41, member of the Mycobacterium tuberculosis PE family, PGRS subfamily of gly-rich proteins (see citation below). Also known as aprC, acid and phagosome regulated protein C, restricted to M. tuberculosis complex (See Abramovitch et al., 2011). Contains PS00583 pfkB family of carbohydrate kinases signature 1. Predicted to be an outer membrane protein (See Song et al., 2008)."

/codon\_start=1

/transl\_table=11

/product="PE-PGRS family protein PE\_PGRS41"

/protein\_id="YP\_177878.1"

CDS

CDS

CDS

/db\_xref="GI:57116982 GeneID:885517"  
 /translation="MSFLIASPEALAAATATYLTGIGSAISAANAVAAAPTTEILAGTDEVSTAI S ALFGAHAQAYQALSAHVAA  
 FHDQFVHTLTAGAGSYMAAEAAAAPLQALQLELLNAINAPTLLALLGRPLIGDGTDAAPGSGGAGGAGGILIGNGGTGGASDLAG  
 TGRGVGGAGGAGGLFGIGGAGGCGSAVAIGDGGAGGAGGVFSGGGAGGAGDAIGSGGAGGTGGLLGGGGAGGAGGAGNG  
 GGASNSASIGDGGSGGAGGMLYAGAGVGGNGGAAVAIGDGGAGGRAGAI GNGDGGNGGTSNTPGGSGDGGNGNAGLIGNG  
 GNGGNAEIVISGGSVAGTGGNGLLLFNGTNGLP"  
 CDS complement(2707680..2709764)  
 /gene="PE\_PGRS42"  
 /locus\_tag="Rv2487c"  
 /experiment="EXISTENCE: identified in proteomics study"  
 /note="Rv2487c, (MTV008.43c), len: 694 aa. PE\_PGRS42,Member of the Mycobacterium  
 tuberculosis PE family, PGRS subfamily of Gly-rich proteins (see citation  
 below),similar to many e.g. AAK47245|MT2919 PE\_PGRS family protein from Mycobacterium  
 tuberculosis strain CDC1515 (663 aa),FASTA scores: opt: 2317, E(): 2.3e-84, (58.35%  
 identity in 622 aa overlap); etc."  
 /codon\_start=1  
 /transl\_table=11  
 /product="PE-PGRS family protein PE\_PGRS42"  
 /protein\_id="YP\_177886.1"  
 /db\_xref="GI:57116995 GeneID:887909"  
 /translation="MSLVIATPQLLATAALDLASIGSQVSAANAAAAMPPTTEVVAADDEVSAAIAGLFGAHHARQYQALSQVAA  
 FHEQFVQALTAAGRYASTEAAVERSLLGAVNAPTEALLGRPLIGNADGTAPGQPGAAGGLLFGNGGNGAAGGFQGTGGSGGAA  
 GLIGNGGAGGAGGTGAAGGAGNGGWLWNGNGGNGVGGTSVAAGIGGAGGNGNAGLFGHGGAGGTGGAGLAGANGVNPTPGPAA  
 STGDSPADVSGIGDQTTGGDGGTGGHGTAGTPTGGTGGDGATATAGSGKATGGAGDGGTAAAGGGGGNGDGGVAQGDIAAFGG  
 DGGNGSDGVAAGSGGGSGGAGGAFVHIATATSTGGSGGFGGNGAASAASGADGGAGGAGGNGGAGGLLFGDGGNGGAGGAGGIG  
 GDGATGGPGGSGGNAGIARFDSPPDEAEPDVVGGKGGDGGKGGSSLVGGVGGAGGTGGAGGNGGAGGLLFGNGGNGNAGAGDGGGA  
 GVAGVGGNGGGGTATFHEDPVAGVWAVGGVGGDGGSGSSLVGGVGGAGGVGKGGASGMLIGNGGNGSGGVGGAGGVGGA  
 GGDGGNGSGGNASTFGDENSI GGAGGTGGNGGNGANGNGGAGGIAGGAGGSGGFLSGAAGVSGADGIGGAGGAGGAGGAGGSG  
 GEAGAGGLTNGPGSPGVSGTEGMAGAPG"  
 CDS complement(2713633..2718615)  
 /gene="PE\_PGRS43"  
 /locus\_tag="Rv2490c"  
 /experiment="EXISTENCE: identified in proteomics study"  
 /note="Rv2490c, (MTV008.46c), len: 1660 aa. PE\_PGRS43,Member of the Mycobacterium  
 tuberculosis PE family,PGRS-subfamily of Gly-rich proteins (see Brennan and Delogu,  
 2002), similar to many e.g. AAK47971|MT3612.1 PE\_PGRS family protein from  
 Mycobacterium tuberculosis strain CDC1551 (1715 aa), FASTA scores: opt: 5161, E():  
 1.5e-187, (51.7% identity in 1752 aa overlap); etc."  
 /codon\_start=1  
 /transl\_table=11  
 /product="PE-PGRS family protein PE\_PGRS43"  
 /protein\_id="YP\_177887.1"  
 /db\_xref="GI:57116996 GeneID:887941"  
 /translation="MSYVIATPEMMATAAFDLARIGSQVSAASAVAAMPPTTEVVAAGADEVSAGIAALFSAHAQEYQALSAQAAA  
 FHDQFVHTLTAAARWYTATEIANAAAAMRVVLGAVNAPTQTL LGRPLIGDGAHGTAPGQPPGAGGLLFGNGGNGAAGAVGVGGAG  
 GAAGLFGIGGAGGAGGAGAPGGTGGTGGWLAGGGVGGMGGAGGGAGGAGGNAGLFGNGGAGGAGGAGGGAGGAGGNAGWFGHGG  
 AGGVGGVGAAGANGATPGQDGAAGVAGSDDGAGDGLAGSDGGDGGAGGVGGNGGRGWLLCNGGAGGVGGVGGAGGAGAAGGAG  
 GAGATGINGPAGISAAGDGGAGGNGGAGGNGVGGAGGAGGSAGLLGYVGRAGDGGAGGGGLGGAPGDGGAGGNGGSWLAAGD  
 GGAGGHGGDPGLGGAGGAGGASGGAGARAGANGLAAGNDGPVSGNGGKGGNGAHAPVAGGHGGNGGAGGNGGLVGDGGAGGHGG  
 DGAAGAGYADMTAIFLGSSTPGEEDGGNGGAGGAGGAGGAHAGDGGAGGAGGNGGAGGAGGNGAHGFNAVLSVSDGGNGDGGAGG  
 RGGDGGAGGAGGDAPAGRAGSQVGGDGGAGGAGGAPNGGSGGRGDMAFKDGAGGDDGGDPGAGGKGGAGGAGATEGVTGAT  
 GATVHSGGNGGKGGNGADATVAGANGGKGGAGGNGGLVGDGGAGDGGSGAAGANGANVDEGADGATLSGQPEGSEANGGGQGV  
 GGGGAGGAGDGGAGSSALGSGGNGGRGDAGQAGGAGGAGGAGGAGGSSVSGDGGPGKGGAGGAGGASGGGGGKGGASGADS  
 AVGGAGGKGGDGGVGGVGGDGGPGDGGAGGAAPAGQVGSVGGVGGDGGGLGGAGGNGDGGHGSDDGGDGGDGGDPGAGGLGGL  
 GGDSNGTRAASGVDA SDHGPSSGNGGNGGNGAQA SVAGGAGGNGDGGNAGRVDGGAGGNGDGAAGANGANSAPGSDALA  
 LGQPPGNGGQGDAGQAGGAGGAGGAGGAGGSSVSGDGGAGGNGGAGGNGGVGASGGAGARGANGIDSIGGTGGAGGGGGDGGAGGV  
 GGHGGDGGVGAAPSSTVGSHTGGVGGDGGGLGGAGGVGGAGGNGGIGITVGGAGGAGGNGDPPGAGRGGGLGGDSNGNTSAANG  
 VDASKHGLPTGGDGGVGGNGAKAAAAGDGGQGGDGGNAGLFGDGGAGGDGADGTAAEALGGDGGAGGAGGKGGDAGDIGDGGD  
 GKGGDGAHGLGGLTVAGNGGAGGAGGAGGAGGAGFLGDGGNGGAGGQGGAGRGGSPGGGGVGGHGGAGGDAGMNGGGGTGGQG  
 GNGAAGGAGWSPSDLKGFDFDGGSGGAGDGGAGGAGGTQTGDGGDGGAGGLGGAGGVGGNGVDGFDINETTGRDGGDGGDGG  
 YGGWGGAGGNGGAGGSAPAGEVGNRGGVGGDGGDGGSGDAGNGLGGDGFYLA DFDGEPGGDGGDGGDGGWGRPGGQGGFGSTS  
 GAHGKAGFGAPGGDGGDGGNGHGGDNGSFADAGDGGPGGNGGNGGLGGAGRDGGAPGGDGGDGGTGGSGGFGAPPPRSIGGGD  
 GGDGGRGGDGGRAGGLTSGGVGSSGESGSGSNGRDPGSGGSGGEGGEGGPSISVNVT"  
 CDS 2833930..2835561  
 /gene="PE\_PGRS44"  
 /locus\_tag="Rv2591"  
 /inference="protein motif:PROSITE:PS00583"  
 /note="Rv2591, (MTCY227.10c), len: 543 aa. PE\_PGRS44,Member of the Mycobacterium  
 tuberculosis PE family, PGRS subfamily of gly-rich proteins (see citation below),

highly similar to others e.g. O53845|Rv0834c|MTV043.26c from Mycobacterium tuberculosis (882 aa), FASTA scores: opt: 1813, E(): 5.8e-66, (55.3% identity in 568 aa overlap). Equivalent to AAK46982 from Mycobacterium tuberculosis strain CDC1551 (505 aa) but longer 38 aa. Contains PS00583 pfkB family of carbohydrate kinases signature 1."

/codon\_start=1  
/transl\_table=11  
/product="PE-PGRS family protein PE\_PGRS44"  
/protein\_id="YP\_177891.1"  
/db\_xref="GI:57117002 GeneID:887992"  
/translation="MSFVTAAPPEMLATAAQNVANIGTSLSAANATAAASTTSVLAAGADEVVSQAIARLFSYDATHYQSLNAQAAA  
FHHSFVQTLNAAAGAYSSAEANASAQALEQNLLAVINAPAQALFGRPLINGANGTAASPNNGDGGILYNGGNGFSQTTAGVA  
GGAGGSAGLIGNGGNGGAGGAGAAGGAGGAGGWLGNNGGAGGPGPTDVPAGTGGAGGAGGDAPLIGWGGNGGPGGFAAFNGGGA  
GGNGGASGSLFGVGGAGGVGGSSEEDVGGTGGAGGAGRGLFLGLGGDGGAGGTSNNNGGDGGAGGTAGGRFLSLGGDGGNGGAGTA  
IGSNAGDGGAGGDSSALIGYAQGGSGGLGGFGESTGGDGLGGAGAVLIGTGVGGFGLGGGNGTGGAGGAGGTGATLIGLGGAG  
GGGGIGGFVAVNVGNVGGGLGGQGGQAALIGLGGAGGAGGATVVGLGGNGDGGDGGGLFSIGVGGDGGNAGNGAMPANGNG  
GNAGVIANGSFAPSFVGFGGNGGNGVNGGTGGSGGILFGANGANGPS"

CDS

complement(2854236..2855621)  
/gene="PE\_PGRS45"  
/locus\_tag="Rv2615c"  
/note="Rv2615c, (MTCY01A10.19), len: 461 aa. PE\_PGRS45, Member of the Mycobacterium tuberculosis PE family, PGRS subfamily of gly-rich proteins (see citation below), highly similar to many e.g. P71664|Rv1396c|MTCY21B4.13c from Mycobacterium tuberculosis (576 aa), FASTA scores: opt: 1629, E(): 4.8e-58, (56.65% identity in 482 aa overlap). Equivalent to AAK47006 from Mycobacterium tuberculosis strain CDC1551 (476 aa) but shorter 15 aa."  
/codon\_start=1  
/transl\_table=11  
/product="PE-PGRS family protein PE\_PGRS45"  
/protein\_id="YP\_177895.1"  
/db\_xref="GI:57117008 GeneID:888215"  
/translation="MSFVNVAPQLVSTAAADAARIGSAINTANTAAAATTQVLAQAQDEVSTAI AALFGSHGQHYQAISAQVAAY  
QQRFLVLAALSQAGSTYAVAEASATPLQNVLDAINAPVQSLTGRPLIGDANGIDGTGQAGGNGGWLWNGGNGGSGAPGQAGGAG  
GAAGLIGNGGAGGAGGQGLPFEAGANGGAGGAGGWLFGNGGAGGNGGIGGAGTNLAIGGHGGNGGNAGLIGAGGTGGAGGTGGGE  
PSAGASGGNGGNGGGLLIGNSGDGAAGNGAGISQNGPASGFGGNGGHAGTTGLIGNGGNGGAGGAGDVSADFGGVGFGGQGG  
GNGGAGLLLYGNGGAGGNGGAAGSPGSVTAFFGGNGGSGSGGNGGNALIGNAGAGGSAGAGGNGASAGTAGGSGGDGGKGGNGGS  
VGLIGNGGNGGAGSFLNAGPFGPGGSGGASLLGPPGLAGTNGADG"

CDS

complement(2870741..2873077)  
/gene="PE\_PGRS46"  
/locus\_tag="Rv2634c"  
/experiment="EXISTENCE: identified in proteomics study"  
/note="Rv2634c, (MTCY441.04c), len: 778 aa. PE\_PGRS46, Member of the Mycobacterium tuberculosis PE family, PGRS subfamily of gly-rich proteins (see citation below), highly similar to many e.g. O53553|YZ08\_MYCTU|Rv3508|MTV023.15 from Mycobacterium tuberculosis (1901 aa), FASTA scores: opt: 2553, E(): 2.2e-93, (53.8% identity in 866 aa overlap). Equivalent to AAK47026 from Mycobacterium tuberculosis strain CDC1551 (788 aa) but shorter 10 aa."  
/codon\_start=1  
/transl\_table=11  
/product="PE-PGRS family protein PE\_PGRS46"  
/protein\_id="YP\_177896.1"  
/db\_xref="GI:57117010 GeneID:888573"  
/translation="MSFVIAPPEALTMASDLANIGSTINAANAAAALPTTGVVAAADEVSAVAALFGSYAQSYQAFGAQLSA  
FHAQFVQSLTNGARSYVVAEATSAAPLQDLLGVVNAPAQALLGRPLINGANGADGTGAPGGPGGLLLNGGNGGSGAPGQPGGA  
GGDAGLIGNGGTGGKGGDGLVGSAAAGGVGRRGWLGNNGGTGGAGGAAGATLVGGTGGVGGATGLIGSGGFGGAGAAAGVGT  
GGVGGSGVGGVFGNGGFGGAGGLGAAGGVGGAASYFGTGGGGVGGDGPAGDGGAGPLLIGNGGVGLGGAGAAGGNGGAGGM  
LLGDGGAGGQGGPAVAVGLGMPGAGGNGGNANWFGSGGAGGQGGTGLAGTNGVNPGSIANPNTGANGTDNSGNGNQTTGGNGGPG  
PAGVGVEAGGVGGQGLGESLDGNDGTGGKGGAGGTAGTDGGAGGAGGAGGIGETDGSAGGVATGEGGGDGTGGVDGGVGGAGG  
KGGQGHNTGVGDAFGDGGIGDGNALGAAGNGGTGGAGGNGRRGMLIGNGAGGAGGTGGTGGGGAAGFAGGVGGAGGEGL  
TDGAGTAEGGTGGLGGLGGVGGTGGMGGSGVGGNGGAAGSLIGLGGGGGAGGVGGTGGIGGIGGAGGNGGAGGAGTTTGGGATI  
GGGGTGGVGGAGGTGGTGGAGGTTGGSGGAGGLIGWAGAAGGTGAGGTGGQGLGGQGGNGGNGGTGATGGQGGDFALGGNGGA  
GGAGGSPGGSSGIQGNMPPGTQADG"

CDS

2964550..2966127  
/gene="PE\_PGRS47"  
/locus\_tag="Rv2741"  
/experiment="EXISTENCE: identified in proteomics study"  
/note="Rv2741, (MTV002.06), len: 525 aa. PE\_PGRS47, Member of the M. tuberculosis PE family, PGRS subfamily of gly-rich proteins (see citation below), highly similar to others e.g. Q10637|YD25\_MYCTU|Rv1325c|MT1367|MTCY130.10c hypothetical PE-PGRS family

protein (603 aa), FASTA scores: opt: 1936, E(): 1.1e-71, (56.95% identity in 611 aa overlap). Predicted to be an outer membrane protein (See Song et al., 2008). This region is a possible MT-complex-specific genomic island (See Becq et al., 2007)."

```
/codon_start=1
/transl_table=11
/product="PE-PGRS family protein PE_PGRS47"
/protein_id="YP_177902.1"
/db_xref="GI:57117018 GeneID:888339"
/translation="MSFVIAAPEFLTAAAMDLSIGSTVSAASAAASAPTVAAILAAGADEVSIAVAALFGMHGQAYQALSVQASA
FHQQFVQALTAGAYSASYASAEAAAVTPLQQLVDVINAPFRSALGRPLIGNGANGKPGTGQDGGAGGLLYGSGNGGSSGLAGSGQKG
GNGGAAGLFGNGGAGGAGASNQAGNGGAGNGGAGGLIWGTAGTGGNGGFTTFLDAAGGAGGAGGAGGLFGAGGAGGVGGAALGG
GAQAAGNGGAGGVGGLFGAGGAGGAGGFSDTGCTGGAGGAGGLFGPGGGSGVGGFQDGGTGGDGGSGGLFGVGGAGGHGGFG
SAAGGDGGAGGAGGTVFGSGGAGGAGGVATVAGHGGHGGNAGLLYGTGGAGGAGGFGGFGDGGDGGIGGLVGGSGGAGGSGGTGT
LSGGRGGAGGNAGTFYGSAGGAGGAGESDNGDGGNGGVGGKAGLVGEGGNGGDGGATIAGKGGSGGNGGNAWLTTQGGNGGNAAF
GKAGTGSVGVGGAGGLLEGQNGENGLLPS"
```

CDS

```
3070570..3072417
/gene="PE_PGRS48"
/locus_tag="Rv2853"
/experiment="EXISTENCE: identified in proteomics study"
/note="Rv2853, (MTCY24A1.04c), len: 615 aa. PE_PGRS48, Member of the Mycobacterium tuberculosis PE family, PGRS subfamily of gly-rich proteins (see citation below), highly similar to many e.g. O53884|Rv0872c|MTV043.65c from Mycobacterium tuberculosis (606 aa), FASTA scores: opt: 1405, E(): 1.4e-97, (64.6% identity in 619 aa overlap). Equivalent to AAK47245 from Mycobacterium tuberculosis strain CDC1551 (663 aa) but shorter 48 aa."
/codon_start=1
/transl_table=11
/product="PE-PGRS family protein PE_PGRS48"
/protein_id="YP_177909.1"
/db_xref="GI:57117029 GeneID:888171"
/translation="MLYVVASPDLMTAAATNLAEIGSAISTANGAAALPTVEVVAADDEVSTQIAALFGAHARSYQTLSTQAAA
FHSRFVQALTTAAASYASVEAANASPLQVALDVINAPAQTLLGRPLIGNGADGSTPGQAGGPGGLLYGNGGNGAAGGPNQAGGAG
GNAGLIGNGAGGAGGVGAVGGKRGTGGLLFGNGGAGGQGLGLAGINGGSGGQGGHGGNAIFLFGQGGAGGPGGTGAMGVAGTNP
TPIGTAAPGSDGVNQINGGNTDLTGGAGGDGNAGSTTVNGGNGGTGGAARNSSGGTGNFSGGAGGAGGDGANGDGGAGGEALT
EGGATAVSGAGGKGGNAEASGAGGNGGKGGFAQATTSTVGGNGGNGGNGHDSNAPGGAGGSGGVGGDGGRGLLAGNGGTGGAG
GNGGTGGAGAPGGAGGAGGKADIANSLGDNATVTGGNGGTGGDGGGALGTGGAGGAGGLGGHGGAGGLLIGNGAGGAGGLGGAG
GAGGAGGEGGAGGAGGEAIPGGASTNSAGGDGGAGGTGGNGGDGGAGGAPGLGGAGGAGGWLIGQSGSTGGGGAGGAGGAGGAGG
AGGSGGAGGHGDTTSGKNGSSGTAGFDGNPQPG"
```



CDS complement(3549875..3551329)  
/gene="PE\_PGRS49"  
/locus\_tag="Rv3344c"  
/note="Rv3344c, (MTV016.44c), len: 484 aa. PE\_PGRS49, Member of the Mycobacterium tuberculosis PE family, PGRS subfamily of gly-, ala-rich proteins (see Brennan and Delogu, 2002). Appears to be a gene fragment, should be in-frame with following ORF, MTV016.45c, frameshift required around 49595 but could not be found on checking BAC and cosmid clones. Similar to many from Mycobacterium tuberculosis strains H37Rv and CDC1551 e.g. O53557|Rv3512|MTV023.19 (1079 aa), FASTA scores: opt: 1595, E(): 1.8e-54, (52.0% identity in 544 aa overlap)."  
/codon\_start=1  
/transl\_table=11  
/product="PE-PGRS family protein PE\_PGRS49"  
/protein\_id="YP\_177961.1"  
/db\_xref="GI:57117093 GeneID:888115"  
/translation="AQA SPAAHGGSSGGAGGNGGAGSAGNGGAGGAGGAGGNGGGDAGNAGSGGNGGKGGDVGPGSTGGAG  
GKGGAGANGSSNGNARGGNAGNGGHGGAGGSGDTGGAGGAGGQGGFGGTGSSGSGIGGGAGGNGGNGGAGGTGVVLGGKGGDGG  
NGDHGFPATNPGSGSRGGAGGSGGNGGAGGNATGSSGKGGAGGNGGDSFGATSGPASIGVTGAPGGNGGKGGAGGNSPNNGSGGD  
GGKGGNGGAGGNGGSSIGANSIVGGSGGAGGAGGNGSLSSGEGGKGGGGHGGDVGVGNSSVTQGGSGGGGAGGAGGSGFF  
GGKGGFGDGGQGGPNGGGTVGTIVAGGGGNGGVGRGGDGVFAGAGGQGGGLGGGNGGGSTGGNGGLGGAGGGGNGAPDGGFGG  
NGKGGQGGIGGGTQSATGLGGDGGDGGNGGNSGAKAGGAGGKQAGQPNSGTPEPGFGDGGGLGGAGATP"

CDS complement(3551049..3555665)  
/gene="PE\_PGRS50"  
/locus\_tag="Rv3345c"  
/experiment="EXISTENCE: identified in proteomics study"  
/note="Rv3345c, (MTV004.01c-MTV016.45c), len: 1538 aa. PE\_PGRS50, Member of the Mycobacterium tuberculosis PE family, PGRS subfamily of gly-rich proteins (see Brennan and Delogu, 2002). Similar to AAK47791 from strain CDC1551 but with some big gaps (after residues 501 and 1419; and for AAK47791 after residue 991). Similar to many from Mycobacterium tuberculosis strains H37Rv and CDC1551."  
/codon\_start=1  
/transl\_table=11  
/product="PE-PGRS family protein PE\_PGRS50"  
/protein\_id="YP\_177962.1"  
/db\_xref="GI:57117094 GeneID:888114"  
/translation="MVMSLMVAPELVAAAAADLTGIGQAI SAANAAAAGPTTQVLAAGDEVSAIAIALFGTHAQEYQALSARVA  
TFHEQFVRSLSLAAGSAYATAEAANASPLQALEQQVVLGA INAPTQLWLGRPLIGDGVHGAPGTGQPGGAGLLWNGGNGGSGAAG  
QVGGPFGAAGLFGNGSGSGGAGAAGGVGSGGWLNGGAGGAGGTGANGGAGNAWLFGAGSGGAGTNGGVGSGGFVYGN  
GGAGGIGGIGGIGGNGGDAGLFGNGGAGGAGAAGLPGAAGLNGDGDSDGGNGGTGGNGGRGGLLVNGGAGGAGGVGGDGGKGGGA  
GDPSFAVNGAGGNGGHGNGPVGAGGAGGALLAGAHGAAGATPTSGGNGDGGIGATANSPLQAGGAGGNGGHGGLVNGGTTGG  
AGGAGHAGSTGATGTALQPTGGNGTNGGAGGHGNGGNGGAQHGDGGVGGKGGAGGSGGAGGNGFDAATLGSFGADGGMGGNGK  
GGDGGKAGDGGAGAAGDVTLAVNQAGGDDGGNGGEVGVGGKGGAGGVSANPALNGSAGANGTAPTSGGNGGNGGAGATPTVAGEN  
GGAGGNGGHGGSVGNNGGAGGAGNGVAGTGLALNGGNGGNGGIGGNGGSAAGTGGDGGKGGNGGAGANGQDF SASANGANGGQGG  
NGGNGGIGGKGGDAFATFAKAGNGGAGGNGNVGVAGQGGAGGKGAIPAMKATGADGTAPTSGGDDGGNGGNGASPTVAGGNGGD  
GGKGGSGGNGVNGGNGGAGGNGAAGQAGTPGPTSGDSGTSGTDDGAGGNGGAGGAGTLAGHGGNGGKGGNGGQGGIGGAGERGA  
DGAGPNANGANGENGGSGGNGDGGAGGNGGAGGKAQAAGYTDGATGTGGDGGNGGDDGGKAGDGGAGENGLNSGAMLPGGGTVGN  
PTGGGNGGNGNAGVGGTGGKAGTGSALTGLDGTDTGITPNGGNGGNGGNGGKGGTAGNGSGAAGGNGGNGGSLNNGDAGNGGNGG  
GALNQAGFFGTGGKGGNGGNGGAGMINGGLGGFGGAGGGGAVDVAATTGGAGGNGGAGGFASTGLGGPGGAGGPGGAGDFASVGV  
GVGGAGDGGAGGVGGFGGQGGIGGEGRTGGNGGSGDGGGGISLGGNGGLGGNGGVSETGFGGAGGNGGYGGPGGPEGNGLGG  
NGGAGGNGGVSTTGGDGGAGGKGGNGGDDGGNVGLGGDAGSGGAGGNGGIGTDDAGGAGGAGGAGGNGGSSKSTTTGNAGSGGAGGN  
GGTGLNGAGGAGGAGGNAGVAVSFGNAVGGDGGNGGNGGHGGDGTGGAGGKGGNGSSGAASGSVNVNVTAGHGGNGGNGGNGG  
NGSAGAGGQGGAGGSAGNGGHGGGATGGDGGNGGNGGNSGNSTGVAGLAGGAAGAGGNGGTTSSAAGHGGSGSGSGSTTGGAGA  
AGGNGGAGAGGSLSTGQSGGPRRQRWCRWQRRRQLGRQRRRRWCRWQRRRQRWRWCRQRRLRRQRWRQRRRCRPLHRRRG  
RQRRRWRQRFRQRQRSRWQRR"

CDS 3570834..3572600  
/gene="PE\_PGRS51"  
/locus\_tag="Rv3367"  
/experiment="EXISTENCE: identified in proteomics study"  
/note="Rv3367, (MTV004.25), len: 588 aa. PE\_PGRS51, Member of the Mycobacterium tuberculosis PE family, PGRS subfamily of gly-rich proteins (see Brennan & Delogu 2002). Similar to many from Mycobacterium tuberculosis strains H37Rv and CDC1551 e.g. O50415|Rv3388|MTV004.46 (731 aa), FASTA scores: opt: 1999, E(): 7.2e-72, (55.0% identity in 620 aa overlap); and MTV004\_44, MTV043\_65, MTV006\_15, MTCY63\_2, MTCY21B4\_13, MTV023\_21, MTV008\_43, MTCY24A1\_4, MTV023\_15; etc. Equivalent to AAK47814 from Mycobacterium tuberculosis strain CDC1551 (628 aa) but shorter 37 aa."  
/codon\_start=1  
/transl\_table=11  
/product="PE-PGRS family protein PE\_PGRS51"  
/protein\_id="YP\_177965.1"

/db\_xref="GI:57117098 GeneID:887404"  
/translation="MSFVAVPEALAAAASDVANIGSALSAAANAAAAGTTGLLAGADEVSAALASLFSGHAVSYQQVAAQATA  
LHDQFVQALTGAGGSYALTEAANVQQLLNAINAPTQALLGRPLIGDGA VGTASSPDQDQDGLLFGNGGAGYNSAATPGMAGGNG  
GNAGLLIGNGGTGGSGGAGAAGGAGGSGWLYGNGGNGIGGNAIVAGGAGGNGGAGGAAGLWGS GSGGQGGNGLTGNDGVNPAP  
VTNPALNGAAGDSNIEPQTSVLIGTQGGDGTGGGAGVNGGNGGAGGDANGNPANTSIANAGAGGNGAAGDGGANGGAGGAGGQA  
ASAGSSVGGDGGNGGAGGTGTNGHAGGAGGAGGAGGRGWLVNGGNGGNGAAGGNGAIGGTGGAGGVPANQGGNSALGTQPVGG  
DGGDGGNGGTGGTGGRGGDGGSGGAGGASGLMNGGNGGNGGTGGSGGVGGNGGIGGDGAGGGNATSTSSIPFDAHGGNGGAGG  
DAGHGGTGGDGGDGGHAGTGGRGGLLAGQHANSNGGGGGTGGAGGTHGTPGSGNAGGTGTGNADSTNGGPGSDGLGGDAFNRSR  
GTDGNPG"

CDS

3593919..3596114  
/gene="PE\_PGRS52"  
/locus\_tag="Rv3388"  
/experiment="EXISTENCE: identified in proteomics study"  
/note="Rv3388, (MTV004.46), len: 731 aa. PE\_PGRS52, Member of the M. tuberculosis PE family, PGRS subfamily of gly-rich proteins (see citation below), similar to many PE-family proteins from Mycobacterium tuberculosis strains H37Rv and CDC1551 e.g. O53553|YZ08\_MYCTU|RV3508|MTV023.15 (1901 aa), FASTA scores: opt: 2380, E(): 3.6e-87, (53.8% identity in 773 aa overlap); and MTV023\_21, MTV023\_18, MTV023\_14, MTV039\_16, MTCY441\_4. Predicted to be an outer membrane protein (See Song et al., 2008)."  
/codon\_start=1  
/transl\_table=11  
/product="PE-PGRS family protein PE\_PGRS52"  
/protein\_id="YP\_177968.1"  
/db\_xref="GI:57117101 GeneID:888151"  
/translation="MSFVIANPEMLAAAATDLGIRSAISAATAAAAAPTQVAAAGADEVSLAISALFGQHAQAYQALSAQATI  
FHDQFVQALTSGGNLYAAAESHTEVQMLNAINAPTQTLFGRPLIGDANGTAENPDQNGGLLFGNGGNGFTQTTAGVAGGNGG  
SAGLIGNGGAGGGGAGAAGGLGNGGWL YGNGGAGGIGGAGTGTGGHGGAGGAGRAWLWGTGGAGGAGDGGWLF DGGGAGGT  
GGNGGSGFNSLTSSVGGAGGAGHAGLFGAGGTGGTGGIGGQNTETGPAASNGGAGGAGGGGYYLVGDGGAGGTGGAGGKNSGG  
ATLTTGGTGGTGGAGGAAGWLYSGGAGGAGGAGLNNAGGATGGTGGTGGAGGSGAWLYGNGGAAGAGGNGNNTSAGTGGVGAS  
GGTGGNAGLIGAGGHGGAGGAGGNQTGGVNGGAGGNGGAGGAGGQLYGNGDGGNGGAGGANIAGGNGSDGGAAGHGGAGGSAR  
LIGAGGHGGDGGAGGNTAGRRADA IAGTGGDGGNGGGLLSGNAGAGGHGGAGGSSATATTTGTPTGATGGNGGNGGAGGTAG  
FTGSGGIGGNGGAGGTGGNAGVALSVGSTGGLGNGGSSGLGGGGGSLFNGGAGGVGATGGNGGSGIGPASVGGNGGKGGVGA  
GGLAGQIGNGGSGSGGAGGNGGTGDTAGNGGNGGAGAVGGNAQLIGNGNGGGGGNGGTGADGT"

CDS

3715886..3720031  
/gene="PE\_PGRS53"  
/locus\_tag="Rv3507"  
/experiment="EXISTENCE: identified in proteomics study"  
/inference="protein motif:PROSITE:PS00583"  
/note="Rv3507, (MTV023.14), len: 1381 aa. PE\_PGRS53, Member of the Mycobacterium tuberculosis PE protein family, PGRS subfamily of gly-rich proteins (see citation below), similar to others from Mycobacterium tuberculosis strains H37Rv and CDC1551 e.g. O06810|Rv1450c|MTCY493.04 (1329 aa), FASTA scores: opt: 2173, E(): 1.4e-135, (51.15% identity in 1412 aa overlap). Equivalent to AAK47970 from Mycobacterium tuberculosis strain CDC1551 (1384 aa) but with some minor differences between the proteins. Contains two PS00583 pfkB family of carbohydrate kinases signatures 1."  
/codon\_start=1  
/transl\_table=11  
/product="PE-PGRS family protein PE\_PGRS53"  
/protein\_id="YP\_177978.1"  
/db\_xref="GI:57117114 GeneID:888256"  
/translation="MSFVLVSPETVAAVATDLKRIGASLAHENASAAAASTTAVVSAAADEVSTAVAALFSQHAQGYQAAAAQVAA  
FHSRFVQALTAGAGAYAFEAANASPLQSAMGAVSASAQTLLSRPLIGNANATTPGGNGDGGWLFSGSGNGAPGAAGQSGGNG  
GSAGLWNGGAGGAGGSGGAAGCNGGNGWLFAGGTGTLGGTGGAPGAMGGTGGNGCNGALLIGGGGLGAGGMGGTGGGTGGT  
GNGNGGALLIGAGGVGGAGGIGGQGTGAGGAAGAGGTGGNGGAGGLFMNGDGGAGGQGGDGAAGDAAAASAGGTGGKGGQGGDGG  
TGGAGGAGPVLFGHGGAGGMGGQGGTGGMGGAGGDGTTVIAAGTGGEGGTGGAAGAGGAAGARGALTSGLLAGVVGAGGTGGTGG  
TGGNGADAAA VVFGFANGDPGFAGGKGGNGGIGGAAVTGGVAGDGGTGGKGGTGGAGGAGNDAGSTGNPGBKGGDGGIGGAGGAG  
GAAGTGNNGHAGNTGDGGDGGTGGNGGNGTGGVNGADNTLNPDP TGGGAGEPGGAGGAGGAGGAAGGPGGTGGTGGNGGNGGNGN  
GGNGGNGGNGNAGNNTNAPVGGEGGAGGDGGAGGAGGAANGGTAGSQGTGGVGGDGGAGGNGGGKAGTGNSTGNFVVDGEAGF  
SGGAGGNGGVGAAGANGGTGGSGGNGDGGAGGIGGAGGNGIPGTGTEPAGGTGAKGGDGGDGGAGGAGNAGGAGGQGGNAGQ  
GGAGGAGGNAVIPGDGVGKAPHGDAGGSGDGGKGGQGGSGGTGGSGAPIGGAGGTGGSGGHAGKGGAGGIGAQTITITVPGNG  
GNAGDGGNGNAGAGGNGGSDFGGNTTSGASGSGGNGNAGTAGSGGAGGTGGTGLSGGNGGNGGNGGNGDGGNGAHGTVGAQ  
FVPATSLPTPNGGAGGNGGTGNSGGAPGAPAGPPTTGGNAGSQIGGDGNGGDDGGKGGDADAVNVVFMPTPEPQAATGTAGSA  
GDPTGGNGGPGTGGSPMVAPPPTPTITQVQQGGDGGAGGTGSTNANDGTATGGKGGEGGVGSILGGPGGNGGTGGNASATGTNGV  
ANAGNGGKGGDGGQFGAGGNGGAGGSSVTDGSAGSTAGNGGNGNATNGTIAGQPAGGNGSAGGKGGDGGNIAAGATGTAGNGGNG  
GNGNDGAVNAGTGGSGGNGNAGGGGANGDGGAGGAGGAGGRGGKIDGGFGDGGNGGNSNGTGGAGGNGGNGGTGGVGSVGA  
GGDGGNGGTGGFAGFGGTAGNGGSGGTGGAGDGGTGGDGGNGV IAGGGGTGGNGGASAGGAGGTGGFAGNGNAGGNGGTGGAS  
EDGDNGNAGSGATGGTGGNGGTGGDGGAAAGLGGVA"

CDS

3720322..3726027  
/gene="PE\_PGRS54"

```

/locus_tag="Rv3508"
/experiment="EXISTENCE: identified in proteomics study"
/inference="protein motif:PROSITE:PS00583"
/note="Rv3508, (MTV023.15), len: 1901 aa. PE_PGRS54, Member of the Mycobacterium tuberculosis PE family, PGRS subfamily of gly-rich proteins (see Brennan & Delogu 2002), similar to others from Mycobacterium tuberculosis strains H37Rv and CDC1551 e.g. downstream 053559|Rv3514|MTV023.21 (1489 aa),FASTA scores: opt: 6598, E(): 0, (71.05% identity in 1533 aa overlap). Equivalent to AAK47971 from Mycobacterium tuberculosis strain CDC1551 (1384 aa) but shorter 13 aa and with some minor differences between the proteins. Contains five PS00583 pfkB family of carbohydrate kinases signatures 1."
/codon_start=1
/transl_table=11
/product="PE-PGRS family protein PE_PGRS54"
/protein_id="YP_177979.1"
/db_xref="GI:57117115 GeneID:888270"
/translation="MSFVLIAPFVTAAGDLTNLSSISAANASAAASATTQVLAAGADEVSARIAALFGGFGLEYQAI SAQVAA
YHQRFVQALSTGAGAYASAEAAAAEQIVLGVINAPTQALLGRPLIGDANATTPGGAGGAGLLFGNGGAGAAGAPGQAGGPGGP
AGLWNGGPGGAGGSGGGTGGAGGAGGWLFGVGGAGGAGGAGGGTGGAGGGGLIWWGGGAGGVGGAGGGTGGAGGRAELFGAG
GAGGAGTDGGPGATGGTGGHGVGGDGGWLPAGGAGGAGGQGGAGGAGSDGGALGVTGGTGGTGGAGGAGRGALLLGGAGGQGG
GGAGGQGGTGGAGGDGVLGVCVTGGKGGVGGVAGLGGAGGAAGQLFSAGGAAGAVGVGGTGGQGGAGGAGAAGADAPASTGLTG
GTGFAGGAGGVGGQGGNAIAGGINGSGGAGGTGGQGGAGMGSGADNASGIGADGGAGGTGGNAGAGGAGGAAGTGGTGGVVA
AGKAGIGGTGGQGGAGGAGSAGTDTATATGATGGTGFSGGAGGAGGAGGNTGVGGTNGSGGQGGTGGAGGAGGAGGVGADNPTGIG
GTGGTGGKGGAGGAGGQGGSSGAGGTNGSGGAGGTGGQGGAGGAGGADNPTGIGGAGGTGGTGGAGAGGAGGAIIGTGGTGG
VGSVGNAGIGGTGGTGGVGGAGGAGAAAAAGSSATGGAGFAGGAGGEGGAGGNSGVGGTNGSGGAGGAGGKGGTGGAGGSGADNP
TGAGFAGGAGGTGGAAGAGGAGGATGTGGTGGVGTATGSAGIGGAGGRGGDGGDASGLGLGLSGFDGGQGGQGGAGGSGAGGI
NGAGGAGGNGDGGDGTAAAGLDNNGVGGDGGAGGAAGNNGNAGVGLTAKAGDGAAGNNGGAGGAGGAGDNNFNNGQGGGA
GGQGGQGLGGASTTSINANGGAGNNGGTGGKGGAGGAGTLGVGSSGGTGGDGGDAGSGGGGGFPGAAGKAGGGNNGRGGDGGD
GASGLGLGLSGFDGGQGGQGGAGGAGGAGGAGGAGGAGGAGGAGGAGGAGGAGGAGGAGGAGGAGGAGGAGGAGGAGGAGGAG
DGAAGNNGGAGGAGGAGDNNFNNGQGGAGGQGGQGGGLGGASTTSINANGGAGNNGGTGGKGGAGGAGTLGVGSSGGTGGDGG
DAGSGGGGGFPGAAGKAGGGNNGVGGDGGEGASGLGLGLSGFDGGQGGQGGAGGAGGAGGAGGAGGAGGAGGAGGAGGAGGAGGAG
GPDGGDGGQGGIGGDDGNAGFGAGVPGDGGDGNAGFGAGVPGDGGIGGTGGAGGAGGAGADGDPSIDGGQGGAGGHHGGQGGKGG
LNSTGLASAASGDGNGGAGGAGGAGGAGGAGGAGGAGGAGGAGGAGGAGGAGGAGGAGGAGGAGGAGGAGGAGGAGGAGGAGGAG
NGFAGGQGGQGGVGNAGAGGAGGAGGAGGAGGAGGAGGAGGAGGAGGAGGAGGAGGAGGAGGAGGAGGAGGAGGAGGAGGAGGAG
LANTGGTAGNAGIGGAGGAGGAGGAGGAGGAGGAGGAGGAGGAGGAGGAGGAGGAGGAGGAGGAGGAGGAGGAGGAGGAGGAGGAG
AGGQGGDGGQGGIGGAGGAGGAGGAGGAGGAGGAGGAGGAGGAGGAGGAGGAGGAGGAGGAGGAGGAGGAGGAGGAGGAGGAGGAG
NGGAGGAGGAGGAGGAGGAGGAGGAGGAGGAGGAGGAGGAGGAGGAGGAGGAGGAGGAGGAGGAGGAGGAGGAGGAGGAGGAGGAG
GGDGGNAPGGFGGAGAGGLGGSGAGGGTDGDDGNGGSPGTDGS"

```

CDS

```

3728934..3731078
/gene="PE_PGRS55"
/locus_tag="Rv3511"
/inference="protein motif:PROSITE:PS00583"
/note="Rv3511, (MTV023.18), len: 714 aa. PE_PGRS55, Member of the Mycobacterium tuberculosis PE family, PGRS subfamily of gly-rich proteins (see Brennan and Delogu, 2002), similar to others from Mycobacterium tuberculosis strains H37Rv and CDC1551 e.g. AAK47974|MT3615.3 (1217 aa) FASTA scores: opt: 2563, E(): 1.5e-94, (59.65% identity in 773 aa overlap); and upstream 053553|Rv3508|MTV023.15 (1901 aa),FASTA scores: opt: 2455, E(): 3.9e-90, (60.4% identity in 737 aa overlap); etc. Contains PS00583 pfkB family of carbohydrate kinases signature 1."
/codon_start=1
/transl_table=11
/product="PE-PGRS family protein PE_PGRS55"
/protein_id="YP_177980.1"
/db_xref="GI:57117116 GeneID:888273"
/translation="MSFVLISPEVVSAAAGDLANVSGTISAANKAAAAATTQVLAAGADEVSARIAALFGMYGLEYQAI SAQVAA
YHQQFVQTLRTGAASYMLAEATNVEQNLLNLINAPTQTLGRPLIGDANATTPGGAGGAGLLFGSGGNGAPGAPGQAGGAGGS
AGLLNGGSGGAGGTGAPGGNNGAGWLYGRGGVGGAGGIGGGTGGAGGHAWLFGHGHTGGIGGGPGGNGWLLNGNGHGGAGGI
GGSGGAGGNGWLLNGGIGGAGGTGGGAGGTGGNAWLLGGGGTGGAGGIGGNGGNGGNGWLLNGGNGGLGGDGGDGGTGG
GHGNGGNPWLLGTAGGGNGGAGSTGTAGGGSGGTGGDGGTGGRGLLMGAGAGGGTGGAGGAGVNGGAGGAGGAGGAGGAGGAGG
AGGQALLFGRGGTGGAGGYGGDGGGGDGFDTMAGLGGTGGSGGTGGDGGAPGNGGAGGAGQLLSHSGVAGASGKGGAGGTGG
NGGAGSAGADAPAGSGAMGSTGFAGGAGGDGGNGGSGASQNGGNGGNGGTGGKGGTGGAGMNSLDPLLAQDGGQGGTGGTGG
NAGAGGTGFTQADGNAGNGDGGVGGNGGADNNTTAAAGTTGGAGGAGGAGGTGGAAGTGTGGQGGNGGNGGNGGTGGKGGT
GGAGMNSLDPLLAQDGGQGGTGGTGGNAGAGGTGFTPRRRRQRRQRR"

```

CDS

```

3731041..3734280
/gene="PE_PGRS56"
/locus_tag="Rv3512"
/experiment="EXISTENCE: identified in proteomics study"
/note="Rv3512, (MTV023.19), len: 1079 aa. PE_PGRS56, Member of the Mycobacterium

```

tuberculosis PE family, PGRS subfamily of gly-rich proteins (see citation below), similar to others from Mycobacterium tuberculosis strains H37Rv and CDC1551 e.g. AAK47974|MT3615.3 (1217 aa) FASTA scores: opt: 3688, E(): 4.5e-130, (53.95% identity in 1136 aa overlap); and downstream O53559|Rv3514|MTV023.21 (1489 aa), FASTA scores: opt: 3611, E(): 3.6e-127, (53.15% identity in 1195 aa overlap); etc. Frameshifted PGRS protein, could be continuation of upstream MTV023.18, but no error could be found."

```
/codon_start=1
/transl_table=11
/product="PE-PGRS family protein PE_PGRS56"
/protein_id="YP_177981.1"
/db_xref="GI:57117117 GeneID:888306"
/translation="PQGADGNAGNGGDGGVGGNGGNGADNTTTAAAGTTGGAGGAGGAGGTGGTGGAAAGTGTGGQQNGGNGGNG
GTGGKGGTGGDLAGSSGGAGGKGGNGGDAGKAGTGSAPGTAAGTGGDGGKGGNGGIGAAAGTTGPVGTGASGGTGGSSGGAGGTGG
DGAANGGTAGAGGAGGNGGKGGDGGAGVTSSTAGNSSGAGGSSGGKGGDAGAGGAGATPGANGIAGNGGDGGDGAAGAVGISGAT
GAGDGGHGGTGAAGNGGTGGAGGSGIDGVGGGTGGTGGNGGNGAIGGAGGDAGGSSNGSGNGGIGGKGGNAGAGGAAGSNGGTV
GANGTGGDGGNGGAAGAATAGSNGGAGTGSAGNGGTGGRGGSSGGAGGDIGGVGGGKGGNGADGEVGGAGGAGGSGPNTSPGGN
GGQQGGGSSGAGGAAGAGGAGGGANGTAGNGGQGGAGGTGGAGAASSATNGGSSGAGGTGGDGGSSGAGGTGGAGGTGGAAGDG
GQQGVPAGSGGGGAGGAGGAGGAGGTGGNGGNTGGTAGTAGAAGNGGAAGKGGAGGQGGTGGGTGGGAGGAGGAGGAGGAGGAGG
GGTGGVAGSGGGGAGGAGGAGGAGGAGGAGGAGGAGGAGGAGGAGGAGGAGGAGGAGGAGGAGGAGGAGGAGGAGGAGGAGGAGG
AGGDAGDAGNGGNGTGNNGGNGGNGIAGMGGNGGAGTGSNGGNGGSSGNGGNGMGGNSGTGSGDGGAGCNGGAAGTGGTGG
DGLTGTGGTGGSGGTGGDGGNGGADNTANMTAQAGDGGNGGDDGGFGGGAGAGGGGLTAGANGTGGQQGAGGDGGNGAIGGH
GPLTDDPGNGGTGGNGGTGGTGGAGIGSLGGTGGDGGNGGNGGTGGEGGEVGGAGGTGGAAGNGDGGTGGTGGGDDGGAGGTG
GTGGTGGGLDPRVGGSGDGGTGGSSGAAGNGGNGGAGAGGNGNGGTGGAGGIGGTGGNGGDAEPGVPPGAGGAGGAGTTGGKG
GTGGNGSGTGGSGGTGGDGGTGGGGGNGGTGWNGGKGDTSGGGAGDGGKAPAGGTGGAGGDGGAGGKGGSSGV"
```

CDS

```
3735111..3739580
/gene="PE_PGRS57"
/locus_tag="Rv3514"
/experiment="EXISTENCE: identified in proteomics study"
/inference="protein motif:PROSITE:PS00583"
/note="Rv3514, (MTV023.21), len: 1489 aa. PE_PGRS57, Member of the Mycobacterium tuberculosis PE family, PGRS subfamily of gly-rich proteins (see citation below), similar to others from Mycobacterium tuberculosis strains H37Rv and CDC1551 e.g. AAK47971 (1715 aa) FASTA scores: opt: 6940,E(): 0, (67.0% identity in 1713 aa overlap); and upstream O53553|YZ08_MYCTU|Rv3508|MTV023.15 (1901 aa), FASTA scores: opt: 6598,E(): 0, (71.05% identity in 1533 aa overlap). Contains two PS00583 pfkB family of carbohydrate kinases signatures 1."
```

```
/codon_start=1
/transl_table=11
/product="PE-PGRS family protein PE_PGRS57"
/protein_id="YP_177982.1"
/db_xref="GI:57117118 GeneID:888294"
/translation="MSFVLIAPFVTAAGDLTNLSSISAANASAAASATTQVLAAGADEVSARIAALFGGFLEYQAIISAQVAA
YHQRFVQALSTGAGAYASAEAAAQIVLGVINAPTQALLGRPLIGDANATTPGGAGGAGLLFGNGGAGAAGAPQAGGPGGP
AGLWNGGPPGAGGSSGGTGGAGGAGWLVFVGGAGGVGGAGGGTGGAGGPGGLIWGGGGAGGVGGAGGGTGGAGGRAELLFAG
GAGGAGTDGGPGATGGTGGHGVGGDGGWLPAGGAGGAGGQGGAGGAGSDGGALGGTGGTGGTGGAGGAGGRGALLLGGGQGG
GGAGQGGTGGAGGDGVLGGVGGTGGKGGVGGVAGLGGAGGAAGQLFSASGAAGNAGVGGAGGQGGDGGAGGAGADADQPGATGG
TGFAGGAGGAGGAGSSGAGGTNGSGGAGGQGGAGGAGGADNPTGIGGTGGDGGTGGAAAGAGGAGGAAGTGGTGGMIGTTGNA
GVGGAGGQGGDGGAGGAGADADQPGATGGTGFAGGAGGAGGAGSSGAGGTNGSGGAGGTGGQGGAGGAGGAGADNPTGIGGTGG
DGGTGGAAAGAGGAGGAAGTGGTGGMIGTTGNAGVGGAGGQGGDGGAGGAGADADQPGATGGTGFAGGAGGAKAGGSSSAGGTNS
SGSAGGTGRQSGTGGAGGAGADNPTGIGGTGGDGGTGGAAAGAGGAGGAAGTGGTGGMIGTTGNAGVGGAGGSSGAGGTNGSGGAG
GTDGQGGAGGAGGAGADNPTGIGGTGGDGGTGGAAAGAGGAGGAGGAGGAGGAGGAGGAGGAGGAGGAGGAGGAGGAGGAGGAGG
TGGTGFAGGAGGAGGAGGAGGAGGAGGAGGAGGAGGAGGAGGAGGAGGAGGAGGAGGAGGAGGAGGAGGAGGAGGAGGAGGAGGAG
TGGTGGSSGGAGGSGGANFNNGTGGTGGTGGKGGNLNTDGLSSATSGTGGTGGTGGKGGTGGAGDSDAGGTGGTGGAGGNAGAGGLA
NTGGTAGNAGIGDGGQGGNGGQGDSSGSLGGQPGFAGGAGGKGGAGGSSGAGGTNGSGGAGGAGGQGGAGGAGISFSNNGSNGGT
GGTGGVGGTGGDGGNAGTGGAGDPGKGGTGGTGGTGGSSGGAGGSGGANFNNGTGGTGGTGGTGGKGGMGGIAGDGGPGDGGNAGV
GGKGGTNGNGSGGTGGTGGAGGNAGAGGLANTGGTAGNAGIGDGGQGGNGGQGDSSGSLGGQPGFAGGPGKGGAGGNAGTGG
TNGSAGGAGGQGGAGGAGISFSNNGSNGGTGGTGGVGGTGGDGGNAGTGGAGDPGKGGTGGTGGTGGSSGGAGGSGGANFNNGTGGT
GGTGGTGGKGGMGGIAGDGGPGDGGNAGVGGKGGTNGNGSGGTGGTGGPGSSGAPTGSSTGGKGGAGGDGGDADGGAATGV
GDGGDGGNGGNGGNGGTGVGSPGGLGGAGGTGGLGGAGAGGGADGGDDGGDQPGNNGS"
```

CDS

```
complement(3814652..3816406)
/gene="PE_PGRS58"
/locus_tag="Rv3590c"
/experiment="EXISTENCE: identified in proteomics study"
/note="Rv3590c, (MTV024.08c, MTCY6F7.04), len: 584 aa. PE_PGRS58, Member of the Mycobacterium tuberculosis PE family, PGRS subfamily of gly-rich proteins (see citation below), highly similar to e.g. O53439|Rv1091|MTV017.44 (853 aa), FASTA scores: opt: 2005, E(): 1.4e-70, (54.95% identity in 646 aa overlap)."
```

```

/transl_table=11
/product="PE-PGRS family protein PE_PGRS58"
/protein_id="YP_177993.1"
/db_xref="GI:57117129 GeneID:887874"
/translation="MSFVIVAPEALMSVASEVAGIGSALNAANAAAAAPTGTGVLAAADEVSAAMAALFGAHAQEFYQRLSAQAAG
FHAQFVQALNAGVNSYASAEANASPLQAVEQQVLGLINGPAQTLLGRPLIGNGADGAPGTGQPGGPGLLWNGGNGGSGVAGV
GGPGGSGGAAGLFGHGNGGAGGSNAAGAGGVGGAGGACWLVGNGGAGGFGVGTTVSGNGGAGGAAGAFNGGNGVGGAGGAIVIG
GLPNGGAGGNAGLIGAGDGGVGGVGGAPGTNGMNPNNQTSQAANGSPGANNGAGSGGAGLPGNPGAVPGRAGGAGGLGGSGSD
TSEGPVTGGNGGNGDGGPGAPGGNGAPGGIGVNTGTGWAYGGNGGNGDGGAGARGDGGNGGNGLALNGGNGIGGNGGAGGRG
GTGAAGNGGIGGGATGTLTFFGSGGDDGGPGGAGANTAGTGGVGGVGGAGGQGLLFGDGGNGGAGGAGGIGGTGASGGAGGKGG
SGLVGGDGGNGGAGGAGGNGGKGGAGGAGGGAGMFSQPGVHGAGGTGGQGGAGGAGGAAGAGTVVAGNPGDPGGFGAAGADG
LPG"
CDS complement(3819979..3821298)
/gene="PE_PGRS59"
/locus_tag="Rv3595c"
/experiment="EXISTENCE: identified in proteomics study"
/note="Rv3595c, (MTCY07H7B.27), len: 439 aa. PE_PGRS59,Member of the Mycobacterium
tuberculosis PE family, PGRS subfamily of gly-rich proteins (see citation
below),similar to many e.g. O53439|Rv1091|MTV017.44 (853 aa),FASTA scores: opt: 1644,
E(): 1.2e-57, (58.75% identity in 492 aa overlap)."
/codon_start=1
/transl_table=11
/product="PE-PGRS family protein PE_PGRS59"
/protein_id="YP_177994.1"
/db_xref="GI:57117130 GeneID:885464"
/translation="MSFVIAVPEFLSAAATDLANLSTISAANAAASIPPTGVLAAAGADDVSAIAALFGAHAQAYQTISAQAAT
FHAQFVQTLASAGAGAYANAEANVQQSLLNAINAPTQALLGRPLIGDADGTAPGQNGGAGLLYNGGNGAAGVNAAGIAGGSGG
AAGLIGNGGSGGAGGAGAAGGSGGQGLLYGNGGAGNGGAATIPGGNGGAGGAGNAWLFNGGAGGLGAAGAAGAAGVNPLTV
PAGQSGMNGNEPGGPGQPGTEFGQTGGTGGTGLSVGGTGGTGGTGGTGGAGGSGGRGGLLVGDGGAGGIGGTGGEGGIGAR
GGTGGQGMGGAGQPGVGGDAGDGGNGGIGDGGAGDGGAGGAGGLFGVSGSSGLGGAAGSGGNGGGGGEPGVAGSPGVGP
AGRGGDGNLQFGPEGAPGQPGQPGQPG"
CDS 3875638..3875952
/gene="PE_PGRS60"
/locus_tag="Rv3652"
/note="Rv3652, (MTV025.001A), len: 104 aa. PE_PGRS60,Member of the Mycobacterium
tuberculosis PE family, PGRS subfamily of gly-rich proteins (see Brennan and
Delogu,2002), similar at N-terminal end with many e.g.
P56877|Y278_MYCTU|Rv0278c|MTV035.06c (957 aa) FASTA scores: opt: 242, E(): 3e-09,
(77.35% identity in 53 aa overlap). Originally annotated as the first part of a
PE-PGRS family protein (Rv3653/PE_PGRS61 being the second part) but more similar to a
PE family protein. Length extended since first submission (+50 aa)."
/codon_start=1
/transl_table=11
/product="PE-PGRS family-related protein PE_PGRS60"
/protein_id="YP_178001.1"
/db_xref="GI:57117139 GeneID:886260"
/translation="MSYVIAAPEALVAAATDLATLSTIGAANAAAAGSTTALLTAGADEVSAAIAAYSECTARPIRHSVGRRRR
SMGSCRPPWPQVGAPMRPPRPPASRRRCRARSIC"
CDS 3875946..3876533
/gene="PE_PGRS61"
/locus_tag="Rv3653"
/note="Rv3653, (MTV025.001B), len: 195 aa. PE_PGRS61,Member of the Mycobacterium
tuberculosis PE family, PGRS subfamily of gly-rich proteins (see Brennan and
Delogu,2002), highly similar to the C-termini of members of the Mycobacterium
tuberculosis PE family, PGRS subfamily of gly-rich proteins, e.g. MTCY1A11_25,
MTCY28_25, MTCY130_10,MTCY1A10_19, MTCY21B4_13, MTCI418B_6,MTCY28_34,
MTV004_1,MTCY441_4; etc. Originally annotated as the second part of a PE-PGRS family
protein (Rv3652/PE_PGRS60 being the first part). Start shortened since first
submission (-50 aa)."
/codon_start=1
/transl_table=11
/product="PE-PGRS family-related protein PE_PGRS61"
/protein_id="YP_178002.1"
/db_xref="GI:57117140 GeneID:886259"
/translation="MLNAPTQALLGRPLVGNANGAPGTGANGDGGILFGSGGAGGSGAAGMAGNGGAAGLFGNGGAGGAGGS
ATAGAAGAGGNGGAGLLFGTAGAGNGGLSLGLGVAGGAGGAGGSGSDTAGHGGTGGAGLLFGAGEDGTTTGGNGGAGGVAG
LFGDGGNGGAGVGTGAGNVGAGGTGGLLLGQDGMTGLT"
CDS 4057395..4058909
/gene="PE_PGRS62"

```

```
/locus_tag="Rv3812"  
/experiment="EXISTENCE: identified in proteomics study"  
/note="Rv3812, (MTV026.17, MTCY409.18c), len: 504 aa. PE_PGRS62, Member of the  
Mycobacterium tuberculosis PE family, PGRS subfamily of gly-rich proteins (see  
citations below), similar to many e.g. P96828|Rv0151c|MTCI5.25c (588 aa), FASTA  
scores: opt: 389, E(): 6.2e-14, (29.2% identity in 473 aa overlap); MTCY7H7B_27;  
MTCY493_24; MTCY441_4; MTCY39_36; MTCY1A11_4; MTCY359_33; MTCY130_10; MTCY98_9; etc.  
The transcription of this CDS seems to be activated in macrophages (see Ramakrishnan  
et al., 2000)."  
/codon_start=1  
/transl_table=11  
/product="PE-PGRS family protein PE_PGRS62"  
/protein_id="YP_178019.1"  
/db_xref="GI:57117161 GeneID:886143"  
/translation="MSFVVTVPEAVAAAAGDLAAIGSTLREATAAAAAGPTTGLAAAAADDVSIQVSLFGRYQGFQTVSNQLAA  
FHTEFVRTLNRGAAAYLNTEANGGQLFGQIEAGQRAVSAAAAAAPPGGAYGQLVANTATNLESYGAWSANPFPFLRQIIANQQV  
YWQQIAAALANAVQNFPALVANLPAAIDAAVQQFLAFNAAYYIQQIISSQIGFAQLFATTVGGVTSVIAGWPNLAAELQLAFQQ  
LLVGDYNAAVANLGKAMTNLLVTGFDTSDVTIGTMGTTISVTAKPKLLGPLGDLFTIMTIPAQEAQYFTNLMPPSILRDMSQNFT  
NVLTTLSNPNIQAVASFDIATTAGTLSTFFGVPLVLTATLGAPFASLNAIATSAETIEQALLAGNYLGAVGALIDAPAHALDGF  
LNSATVLDTPILVPTGLPSPLPPTVGITLHLPFDGILVPPHPVTATISFPGAPVPIPGFPTTVTVFGTTFMGMAPLLINYIPQQL  
ALAIKPAA"
```

gene complement(2217083..2218387)  
/gene="PE\_PGRS36"  
/locus\_tag="Rv2098c"  
/pseudogene="unknown"  
/db\_xref="GeneID:888312"

misc\_feature complement(2217083..2218387)  
/gene="PE\_PGRS36"  
/locus\_tag="Rv2098c"  
/note="Rv2098c, (MTCY49.38c), len: 434 aa. PE\_PGRS36, Member of the Mycobacterium tuberculosis PE family, PGRS subfamily of gly-rich proteins (see citation below). Frameshifted near N-terminus (see Rv2099c|PE21)."  
/pseudogene="unknown"

misc\_feature complement(2218387..2218560)  
/gene="PE21"  
/locus\_tag="Rv2099c"  
/note="Rv2099c, (MTCY49.39c), len: 58 aa. PE21, Member of the Mycobacterium tuberculosis PE family (see Brennan and Delogu, 2002); 5'-end of Rv2098c|PE\_PGRS36|MTCY49.38c, then frameshifts. Sequence has been checked, no errors found."  
/pseudogene="unknown"

CDS complement(173205..174782)  
/gene="PE2"  
/locus\_tag="Rv0152c"  
/experiment="EXISTENCE: identified in proteomics study"  
/note="Rv0152c, (MTCI5.26c), len: 525 aa. PE2, Member of the Mycobacterium tuberculosis PE family (see citation below), similar to ORF downstream Z92770|MTCI5\_25 (588 aa),FASTA scores: opt: 1492, E(): 0, (54.7% identity in 464 aa overlap); and to many other PE family type members. Predicted to be an outer membrane protein (See Song et al.,2008)."  
/codon\_start=1  
/transl\_table=11  
/product="PE family protein PE2"  
/protein\_id="YP\_177696.1"  
/db\_xref="GI:57116695 GeneID:886838"  
/translation="MRCRPPSRNRSASHTARNTRPCLSKSRRFTVRFHQTLAAAANSYADAEAAIASTRQNQLAVPAAAPTAAAA  
MIPFPANLTTLFFGPTGIPLPPSMLTTPPIRCRSVRRALQAVFTPEELYPLTGVRSLVNLNTSVEEGLTILHDAIMVELATTGNA  
VTVFQWSQSAIIASLEMQRFTAMGGAAPSASDLNFVLVGNEMNPNGGMLARFPDLTLPDLTDFYGATPSDTIYPTAIYTTLEYDG  
FADFSTRYPLNFISDLNAVAGITFVHTKYLDTLPAQVEGATKLPTSPGYTGVTDYIIRTENRPLLQPLRAVPIVGDPLADLIQPN  
LKVIVNLGYGDPNYGYSTSYADVTRTPFGLWPNVPPQVIADALAAGTQEGILDFTADLQALSAQPLTLPQIQLPQPADLVAAVAAA  
PTPAEYVNTLARIISTNYAVLLPTVDIALALVTTPLPLYTTQLFVVRQLAAGNLINAIGYPLAATVGLGTIDSGRRGIAHPPRGGLG  
HRSKHRGPRHLTDSRRHRPPTTVYRPRQ"

CDS complement(181319..182725)  
/gene="PE3"  
/locus\_tag="Rv0159c"  
/note="Rv0159c, (MTV032.02c), len: 468 aa. PE3, Member of the Mycobacterium tuberculosis PE family (see citation below), similar to many other PE proteins e.g. O06828 from Mycobacterium tuberculosis (528 aa), FASTA scores: opt: 1163, E(): 0, (45.8% identity in 467 aa overlap). Also highly similar to upstream MTV032\_3, and to MTCI5\_25,MTCI5\_26, MTV049\_21, MTCY1A10\_26, etc."  
/codon\_start=1  
/transl\_table=11  
/product="PE family protein PE3"  
/protein\_id="YP\_177697.1"  
/db\_xref="GI:57116696 GeneID:886826"  
/translation="MSYVIAAPEMLATTAADVDGIGSIRAASASAAAGPTTGLLAAADEVSSAAAALFSEYARECQEVLKQAAA  
FHGEFTRALAAAGAAYAQAESNTAAMSGTAGSSGALGSVGMLSGNPLTALMMGGTGEPILSDRVLAIDSAYIRPIFGPNNPVA  
QYTFEQWPFIGNLSLDQSIACQVTLNNGINAELQNGHDVVVFGYSQSAAVATNEIRALMALPPGQAPDPSRLAFTLIGNINNP  
NGGVLEERYVGLYLPFLDMSFNGATPPDSPYQTYMYTGQYDGYAHNPQYPLNLSDLNAFMGIRVWHNAYPFTAAEVANAVPLPTS  
PGYTGNTHYMFLTQDLPLLQPIRAIPFVGTPIAELIQPDLRVLVDLGYGYADVPTPASLFAPINPIAVASALATGTVQGPQA  
ALVSIGLLPQSALPNTYPYLPANPGLMNFNGQSSVTELSVLSGALGSVARLIPPIA"

CDS complement(182817..184325)  
/gene="PE4"  
/locus\_tag="Rv0160c"  
/experiment="EXISTENCE: identified in proteomics study"  
/note="Rv0160c, (MTV032.03c), len: 502 aa. PE4, Member of the Mycobacterium tuberculosis PE family (see citation below), similar to many other PE proteins e.g. Z92770|MTCI5\_26c from Mycobacterium tuberculosis (525 aa),FASTA scores: opt: 816, E(): 0, (41.4% identity in 367 aa overlap); C-terminal region of O06801|RV1768|MTCY28.34 from Mycobacterium tuberculosis (618 aa), FASTA scores: opt: 417, E(): 6.7e-18, (53.5% identity in 142 aa overlap). Also highly similar to downstream ORF MTV032\_2."  
/codon\_start=1  
/transl\_table=11  
/product="PE family protein PE4"  
/protein\_id="YP\_177698.1"  
/db\_xref="GI:57116697 GeneID:886825"  
/translation="MSHLVTAPDMLATAAAHVDEIASTLRAANAAAAGPTCNLLAAAGDEVSAATAALFSAYGREYQAVVKQAAA  
FHSEFTRTLEAAGNAYAHAEANAARVSHALDTINAPIRTLGRAPLSPNGSSGAGGLPAIAQLAAESPITALIMGGTNNPLPDP  
EYVTDINKAFIQTLFPGAVSQGLFTPEQFWPVPDPLGNLTFNQSVTEGVALLNTAVNNQALDKNVAVFGYSQSATIIINNYINSL  
MAMGSPNPDDISFVMIGSGNNPVGGLLARFPGFYIPFLDVPFNGATPANSYPYTHIYTAQYDGIHAPQFPLRILSDINAFMGYF  
YVHNTYPELMATQVDNAVPLPTSPGYTGNTQYYMFLTQDLPLLQPIRDIPIYAGPPIADLFQFPQLRVLVDLGYADYGPGGNYADIP  
TPAGLFSIPNPFVAVTYLIKGLSQAPYGAIVEIGVEAGLIGPEWFPDSYPWVPSINPGLNFYFGQPQVTLTSLMSGGLGNILHLI  
PPPVFT"

CDS 334840..335148  
/gene="PE5"  
/locus\_tag="Rv0285"  
/experiment="EXISTENCE: identified in proteomics study"  
/note="Rv0285, (MTV035.13), len: 102 aa. PE5, Member of the Mycobacterium tuberculosis PE family (see Brennan & Delogu 2002), similar to others e.g.



AL0212|MTV012\_37 from Mycobacterium tuberculosis (105 aa), FASTA scores: opt: 497, E(): 2.6e-24, (80.4% identity in 102 aa overlap); Z80108|MTCY21B4.03 from Mycobacterium tuberculosis (102 aa), FASTA scores: opt: 413, E(): 3.7e-19, (66.7% identity in 102 aa overlap); etc. A core mycobacterial gene; conserved in mycobacterial strains (See Marmiesse et al.,2004)."

```
/codon_start=1
/transl_table=11
/product="PE family protein PE5"
/protein_id="YP_177710.1"
/db_xref="GI:57116715 GeneID:886608"
/translation="MTLRVVPEGLAAASAAVEALTARLAAAHASAAAPVITAVVPPAADPVSLQTAAGFSAQGVHAVVTAEGVEE
LGRAGVGVGESGASYLAGDAAAATYGVVGG"
CDS complement(371926..372441)
/gene="PE6"
/locus_tag="Rv0335c"
/experiment="EXISTENCE: identified in proteomics study"
/note="Rv0335c, (MTCY279.02c), len: 171 aa. PE6, Member of the Mycobacterium tuberculosis PE family (see Brennan & Delogu 2002); contains short region of similarity to part of the unique N-terminus of the Mycobacterium tuberculosis PGRS family of Glycine-rich proteins e.g. Y03A_MYCTU|Q10637 hypothetical glycine-rich 49.6 kd protein (603 aa), FASTA scores: opt: 219, E(): 1.1e-08, (51.5% identity in 66 aa overlap)."
```

```
/codon_start=1
/transl_table=11
/product="PE family protein PE6"
/protein_id="YP_177717.1"
/db_xref="GI:57116722 GeneID:886527"
/translation="MRSMGFLHRACRAPSSLPAPLMARPGRSVLARPAATPPGPLCATTRPRPPQGNQPPASRISNFPKPKRHKTR
VLAAAEDEVSAAVAALISAHGRRHSLNNAQAAAFHGQFAQNLNVGAGSCASAEETTADAPTQALLGPADRQRQRRAVRQWLVRWA
AHPGRATRGRFHNHRQ"
CDS complement(955423..955722)
/gene="PE7"
/locus_tag="Rv0916c"
/gene_synonym="MTB10"
/note="Rv0916c, (MTCY21C12.10c), len: 99 aa. PE7 (alternate gene name: MTB10). Member of the Mycobacterium tuberculosis PE family (see citations below), similar to many e.g. Rv1788 from Mycobacterium tuberculosis (99 aa), FASTA scores: opt: 321, E(): 1.3e-11, (53.5% identity in 99 aa overlap); etc."
```

```
/codon_start=1
/transl_table=11
/product="PE family protein PE7"
/protein_id="YP_177766.1"
/db_xref="GI:57116796 GeneID:885167"
/translation="MSFVTIQPVVLAATGDLPTIGTAVSARNTAVCAPTTGVLPPAANDVSVLTAARFTAHTKHYRVVSKPAAL
VHGFMFVALPAATADAYATTEAVNVVATG"
CDS complement(1090310..1091137)
/gene="PE8"
/locus_tag="Rv1040c"
/note="Rv1040c, (MTCY10G2.09), len: 275 aa. PE8, Member of the Mycobacterium tuberculosis PE family (see citation below), most similar to AL008967|MTV002_34 Mycobacterium tuberculosis H37Rv (275 aa), FASTA scores: opt: 1111, E(): 0, (68.6% identity in 283 aa overlap). This region is a possible MT-complex-specific genomic island (See Becq et al., 2007)."
```

```
/codon_start=1
/transl_table=11
/product="PE family protein PE8"
/protein_id="YP_177779.1"
/db_xref="GI:57116814 GeneID:888533"
/translation="MSFLKTVPEELTAAAAQLGTIGAAMAAQNAAAAAPTTAIAPAALDEVSAALQALFTAYGTFYQOVSAEAQA
MHD MFVNTLGISAGTYGVTESLNSSAAASPLSGITGEASAI IQATTGLFPPELGGIGNILNIGAGN WASATSTLIGLAGGGLLP
AEEAAEASALGGEAALGELGALGAAEAALGEAGIAAGLGSASAIGMLSVPPAWAGQATLVSTTSTLPGAGWTAAPQAAAGTFI
PGMPGVASAARNSAGFGAPRYGVKPIVMPK PATV"
CDS 1136574..1137008
/gene="PE9"
/locus_tag="Rv1088"
/experiment="EXISTENCE: identified in proteomics study"
/note="Rv1088, (MTV017.41), len: 144 aa. PE9, Member of Mycobacterium tuberculosis PE family (see citation below), similar to many others e.g. Z96071|MTCI418B_6 Mycobacterium tuberculosis cosmid (487 aa), FASTA scores: opt: 318, E(): 7.3e-14,
```

(60.9% identity in 87 aa overlap) - except it appears to be frameshifted around codon 84. No error to account for frameshift could be found."

/codon\_start=1  
/transl\_table=11  
/product="PE family protein PE9"  
/protein\_id="YP\_177784.1"  
/db\_xref="GI:57116823 GeneID:887096"  
/translation="MSYMIATPAALTAATDIDIGISAVSVANAAVAATTGVLAAAGDEVLAAIARLFNANAEEYHALSAQVAA  
FQTLFVRTLTGGCGVFRRRRGRQCVTAAEHRAAGARRRQRRRRSGDGQWRLRQQRHFQCGGQPEFRQHSEHRR "  
CDS 1136830..1137192  
/gene="PE10"  
/locus\_tag="Rv1089"  
/note="Rv1089, (MTV017.42), len: 120 aa. PE10, Member of the Mycobacterium tuberculosis PE family of glycine-rich proteins (see citation below). Partial ORF that appears to be frameshifted continuation of Rv1088|MTV017.41. Sequence has been checked and appears correct. Similar to Z95555|MTCY06F7\_4 Mycobacterium tuberculosis cosmid (401 aa), FASTA scores: opt:126, E(): 2, (29.6% identity in 125 aa overlap). This region is a possible MT-complex-specific genomic island (See Becq et al., 2007)."  
/codon\_start=1  
/transl\_table=11  
/product="PE family protein PE10"  
/protein\_id="YP\_177785.1"  
/db\_xref="GI:57116824 GeneID:887090"  
/translation="SFAGAEANASQLQSIARQVRGAVNAVAGQVTGNNGSGNSGTSAAAANPNSDNTASIA DRGTS AIMTTASA  
TASSTGVDGGIAATYAVASQWDGGYVANYTITQFGRDFDDRLAVAIHFA "  
CDS complement(1218356..1219282)  
/gene="PE12"  
/locus\_tag="Rv1172c"  
/experiment="EXISTENCE: identified in proteomics study"  
/note="Rv1172c, (MTV005.08c), len: 308 aa. PE12, Member of the Mycobacterium tuberculosis PE family of proteins (see Brennan & Delogu 2002), e.g. P71748|Z81368|MTCY253.25C (361 aa), FASTA scores: opt: 483, E(): 7.8e-22, (46.4% identity in 192 aa overlap)."  
/codon\_start=1  
/transl\_table=11  
/product="PE family protein PE12"  
/protein\_id="YP\_177793.1"  
/db\_xref="GI:57116839 GeneID:885988"  
/translation="MSFVFAAPEALAAAAADMAGIGSTLNAANVVAVPPTGVLAAADEVSTQVAALLSAHAQGYQQLSRQMMT  
AFHDQFVQALRASADAYATAEASAAQTMVNAVNPAPARALLGHPLISADASTGGGSNALSRVQSMFLGTGGSSALGSSAAAANAAS  
GALQLQPTGGASGLSAVGALLPRAGAAAAALPALAAESIGNAIKNLYNAVPEVWQYGFNLTAWAVGWLPYIGILAPQINFFYYL  
GPIVQAVLNFNAIDFVDGTVTF SQALTNIETATAASINQFINTEINWIRGFLPPLPPI SPPGFP SLP "  
CDS 1255604..1255903  
/gene="PE13"  
/locus\_tag="Rv1195"  
/experiment="EXISTENCE: identified in proteomics study"  
/note="Rv1195, (MTCI364.07), len: 99 aa. PE13, Member of Mycobacterium tuberculosis PE family (see Brennan & Delogu 2002), e.g. Y0DP\_MYCTU|Q50615 hypothetical glycine-rich 40.8 kd protein (498 aa), FASTA scores: opt: 307, E(): 1.4e-12, (56.3% identity in 96 aa overlap), similar to MTCY21C12.10c (99 aa), FASTA scores: opt:295, E(): 1.9e-11,(51.5% identity in 97 aa overlap)."  
/codon\_start=1  
/transl\_table=11  
/product="PE family protein PE13"  
/protein\_id="YP\_177794.1"  
/db\_xref="GI:57116840 GeneID:886044"  
/translation="MSFVMAYPEMLAAAADTLQSIGATTVASNAAAAAPTGTGVPPAADEVSA LTA AHFAA HAAMYQSVSARAAA  
IHDQFVATLASSASSYAATEVANAAAAS "  
CDS complement(1272718..1273050)  
/gene="PE14"  
/locus\_tag="Rv1214c"  
/experiment="EXISTENCE: identified in proteomics study"  
/note="Rv1214c, (MTCI364.26c), len: 110 aa. PE14, Member of Mycobacterium tuberculosis PE family (see citation below), appears to be frameshifted but sequence appears to be correct. The 5'-end is atypical as first 9 aa appear to be missing."  
/codon\_start=1  
/transl\_table=11  
/product="PE family protein PE14"  
/protein\_id="YP\_177797.1"

/db\_xref="GI:57116843 GeneID:888362"  
/translation="MLASAATDLAIGSALSANAAAAAPTAMLAACADEVSAVVASLAFARHAQAYQALSQATAFHQQFVQAL  
TGAGGAYAAAEAVNAAVAQSVQQDVLNVINAPTQALFDR"  
1472197..1472501  
CDS  
/gene="PE15"  
/locus\_tag="Rv1386"  
/experiment="EXISTENCE: identified in proteomics study"  
/note="Rv1386, (MTCY21B4.03), len: 102 aa. PE15, Member of Mycobacterium tuberculosis  
PE family (see Brennan & Delogu 2002), similar to many e.g. G913039 ORF 3' of PGRS  
tandem repeat (polymorphic GC-rich sequence) (100 aa), FASTA scores: opt: 149, E():  
0.0013, (31.5% identity in 92 aa overlap); also similar to Q49943|U1756A (99 aa)  
(34.7% identity in 95 aa overlap) and G466937|U1620K (100 aa) (36.2% identity in 69  
aa overlap). A core mycobacterial gene; conserved in mycobacterial strains (See  
Marmiesse et al., 2004). Predicted to be an outer membrane protein (See Song et al.,  
2008)."  
/codon\_start=1  
/transl\_table=11  
/product="PE family protein PE15"  
/protein\_id="YP\_177805.1"  
/db\_xref="GI:57116857 GeneID:886757"  
/translation="MTLRVVPESLAGASAAIEAVTARLAAAHAAAAPFIAAVIPGSDSVSVCNAVEFSVHGSQHVAMAAQGVVE  
LGRSGVGAESGASYAARDALAAASYLSGG"  
1513768..1515354  
CDS  
/gene="PE16"  
/locus\_tag="Rv1430"  
/note="Rv1430, (MTCY493.24c), len: 528 aa. PE16, Member of the Mycobacterium  
tuberculosis PE family of proteins (see citation below), e.g. Y0D4\_MYCTU|Q50594  
(55.9% identity in 127 aa overlap). The C-terminus shows similarity to  
Q49633|LEPB1170\_F3\_112 hypothetical Mycobacterium leprae protein (391 aa), FASTA  
scores: opt: 342, E(): 1.2e-13, (29.8% identity in 292 aa overlap). Possible TMhelix  
aa 500-522."  
/codon\_start=1  
/transl\_table=11  
/product="PE family protein PE16"  
/protein\_id="YP\_177810.1"  
/db\_xref="GI:57116862 GeneID:886652"  
/translation="MSFVFAVPEMVAATASDLASLGAALSEATAAAAIPPTQVLA AAADEVSAIAELFGAHGQEFQALSAQASA  
FHDRFVRALSAAAGWYVDAEAANAALVDTAATGASELGSGRRTALILGSTGTPRPPFDYMQQVYDRYIAPHYLGAFSGLYTPAQ  
FQPWTGIPSLTYDQVAEGAGYLHTAIMQQAAGNDVVVLGFSQGASVATLEMRHLASLPAGVAPSPDQLSFLVLLGNPNNPNNGGI  
LARFPGLYLQSLGLTFNGATPDTDYATTIYTTQYDGFADFPKYPLNILADVNALLGIYYSHSLYYGLTPEQVASGIVLPVSSPDT  
NTTYILLPNEDLPLLQPLRGIVPEPLLDLIEPDLRAIIEELGYDRTGYADVPTPAALFPVHIDPIAVPPQIGAAIGGPLTALDGLL  
DTVINDQLNPPVVTSGIYQAGAELSVAAAGYGAPAGVTNAIFIGQOVLPILVEGPGALVTADTHYLVDAIQDLAAGDLSGFNQNLQ  
LIPATNIALLVFAAGIPAVAAVAAILTGQDFPV"  
1752304..1753236  
CDS  
/gene="PE17"  
/locus\_tag="Rv1646"  
/experiment="EXISTENCE: identified in proteomics study"  
/note="Rv1646, (MTCY06H11.11), len: 310 aa. PE17, Member of the Mycobacterium  
tuberculosis PE family of proteins (see citation below), similar to many e.g.  
YW36\_MYCTU|Q10873 hypothetical 53.7 kd protein cy39.36c (558 aa), FASTA scores, opt:  
411, E(): 1.3e-15, (34.4% identity in 320 aa overlap)."  
/codon\_start=1  
/transl\_table=11  
/product="PE family protein PE17"  
/protein\_id="YP\_177825.1"  
/db\_xref="GI:57116896 GeneID:885486"  
/translation="MSFLTVAAPDMVTAAAGNLESVGSALNEAAAAAPATVGLAAPAADRVS AVVAAMLGAYARDFQGISAQIAG  
FHNQFVGALRGGAAAYASAEANVQQT VVNAV NAPAQALLGHPLIGPETVGSAAA AVSFGFGPLLLAGSDPLLAVPFSYPASLPT  
PFGPVTMTLNGSFDPLTQQVVFDSGSLTAPAPFVYGLGAVGPALTTMTALQNSGTA FSGAVQSGNLLGAAGALLQAPGNAVTFGL  
FGQTAISQSIPGPSNLGYESVGISVPVGGLLAPLQPVTVTLTPTSGMPTAIQLSGTQFGLLPALLNGF"  
1911521..1911820  
CDS  
/gene="PE18"  
/locus\_tag="Rv1788"  
/note="Rv1788, (MTV049.10), len: 99 aa. PE18, Member of the Mycobacterium  
tuberculosis PE family of gly-, ala-rich proteins (see citation below), similar to  
Z93777|MTCI364.07 Mycobacterium tuberculosis cosmid (99 aa), FASTA scores: opt: 414,  
E(): 3.6e-20, (72.4% identity in 98 aa overlap)."  
/codon\_start=1  
/transl\_table=11

/product="PE family protein PE18"  
 /protein\_id="YP\_177834.1"  
 /db\_xref="GI:57116910 GeneID:885895"  
 /translation="MSFVTTQPEALAAAAGSLQGIGSALNAQNAAAATPTTGVVPAAADEVSALTAQAFAAQAQIYQAVSAQAAA  
 IHMFVNTLQMSSGSYAATEAANAAAAG"  
 CDS 1912713..1913012  
 /gene="PE19"  
 /locus\_tag="Rv1791"  
 /note="Rv1791, (MTV049.13), len: 99 aa. PE19, Member of the Mycobacterium tuberculosis PE family, but no glycine rich C-terminus (see Brennan & Delogu 2002), highly similar to Z93777|MTCI364.07 M.tuberculosis cosmid (99 aa) opt: 430 E(): 2.4e-21, (75.5% identity in 98 aa overlap)."  
 /codon\_start=1  
 /transl\_table=11  
 /product="PE family protein PE19"  
 /protein\_id="YP\_177837.1"  
 /db\_xref="GI:57116913 GeneID:885445"  
 /translation="MSFVTTQPEALAAAANLQIGITMNAQNAAAAPTPTTGVVPAAADEVSALTAQAFAAQAQMYQTVSAQAAA  
 IHMFVNTLVASSGSYAATEAANAAAAG"  
 CDS 1924329..1924628  
 /gene="PE20"  
 /locus\_tag="Rv1806"  
 /experiment="EXISTENCE: identified in proteomics study"  
 /note="Rv1806, (MTV049.28), len: 99 aa. PE20, Member of the Mycobacterium tuberculosis PE family of gly-, ala-rich proteins (see citation below), most similar to Rv1788|MTV049.10|AL022021 (99 aa), FASTA scores: opt: 334,E(): 4.7 e-15, (59.8% identity in 97 aa overlap). This region is a possible MT-complex-specific genomic island (See Becq et al., 2007)."  
 /codon\_start=1  
 /transl\_table=11  
 /product="PE family protein PE20"  
 /protein\_id="YP\_177843.1"  
 /db\_xref="GI:57116919 GeneID:885537"  
 /translation="MAFVLVCPDALAIAAGQLRHVGSVIAARNAVAAPATAELAPAADEVSALTATQFNFHAAMYQAVGAQAIA  
 MNEAFVAMLGASADSYAATEAANIIVS"  
 CDS 2226235..2226531  
 /gene="PE22"  
 /locus\_tag="Rv2107"  
 /note="Rv2107, (MTCY261.03), len: 98 aa. PE22, Member of mycobacterial PE family (see citation below). A core mycobacterial gene; conserved in mycobacterial strains (See Marmiesse et al., 2004)."  
 /codon\_start=1  
 /transl\_table=11  
 /product="PE family protein PE22"  
 /protein\_id="YP\_177858.1"  
 /db\_xref="GI:57116945 GeneID:887811"  
 /translation="MSFVNVDPFGLMAAATLESLSGHMAVSNAAVASVTTKVPVPPAADYVSKKLSLFFSSHGQQYQVQAARGTA  
 FHRKLVRTLALAYEEVEIANNEGF"  
 CDS 2455083..2456231  
 /gene="PE23"  
 /locus\_tag="Rv2328"  
 /experiment="EXISTENCE: identified in proteomics study"  
 /note="Rv2328, (MTCY3G12.06), len: 382 aa. PE23, Member of the Mycobacterium tuberculosis PE family (see citation below), similar to others e.g. Q9L8K5|MAG24-1 PE-PGRS homolog from Mycobacterium marinum (638 aa), FASTA scores: opt: 495, E(): 6.6e-18, (34.65% identity in 401 aa overlap); etc."  
 /codon\_start=1  
 /transl\_table=11  
 /product="PE family protein PE23"  
 /protein\_id="YP\_177867.1"  
 /db\_xref="GI:57116969 GeneID:888111"  
 /translation="MQFLSVIPEQVESAAQDLGIRSALSASYAAAAGPTTAVVSAAEDEVSTAIASIFGAYGRQCQVLSAQASA  
 FHDEFVNLKGTGATAYRNTEFANAQSNVLNAVNPAPRSLLGHPSAAESVQNSAPTLLGGGHSTVTAGLAAQAGRAVATVEQQAAAA  
 VAPLPSAGAGLAQVNVGVVTAGQGSAAKLATALQSAAPWLAKSGGEFIVAGQSALTGVALLQPAVVGVVQAGGTFLTAGTSAATG  
 LGLLTLAGVEFSQGVGNLALASGTAATGLGLLGSAGVQLFSPAFLAVPTALGGVGS LAIAVVQLVQGVQHLVVPNVVAGIAA  
 LQTAGAQAQGVNHTMLAAQLGAPGIAVLQTAGGHFAQGIGHLTTAGNAAVTVLIS"  
 CDS 2553766..2554485  
 /gene="PE24"  
 /locus\_tag="Rv2408"

/note="Rv2408, (MTCY253.12c), len: 239 aa. Possibly PE24, a member of PE family (see citation below), similar to AAK46440|MT2159 from Mycobacterium tuberculosis strain CDC1551 (491 aa) FASTA scores: opt: 269, E(): 5.4e-08,(38.45% identity in 156 aa overlap) and AAK45466|MT1209 from Mycobacterium tuberculosis strain CDC1551 (308 aa),FASTA scores: opt: 265, E(): 6.3e-08, (36.0% identity in 197 aa overlap)."  
 /codon\_start=1  
 /transl\_table=11  
 /product="Possible PE family-related protein PE24"  
 /protein\_id="YP\_177880.1"  
 /db\_xref="GI:57116986 GeneID:885511"  
 /translation="MLIARPDILCSRGPPEAMRAKAADLDLAAAAKTVGVQPAADQVAAAIAAILLSHAQIYQDISTQMAAFHDQL  
 VENTADSTSYASAEANAQQSLLNAMDAPSWQQRRETVGEVGLPADPAGSGTATAAVAAATTARAGSRSAQAQATVAPIGGLKLR  
 ESALSQPGDLHHHVEVGDALPRVDPFQQRNGVGVAAAYTHTDVLLGDLVIGGVVVPSTGPGPLNPGMAAPVYRLSHHGITLRV"  
 complement(2575131..2575430)  
 /gene="PE25"  
 /locus\_tag="Rv2431c"  
 /experiment="EXISTENCE: identified in proteomics study"  
 /note="Rv2431c, (MTCY428.15), len: 99 aa. PE25, Member of the Mycobacterium tuberculosis PE family (see Brennan & Delogu 2002), similar to others e.g. AAK47158|MT2839 from Mycobacterium tuberculosis (275 aa) FASTA scores: opt: 194,E(): 2.5e-06, (40.0% identity in 95 aa overlap); etc."  
 /codon\_start=1  
 /transl\_table=11  
 /product="PE family protein PE25"  
 /protein\_id="YP\_177882.1"  
 /db\_xref="GI:57116989 GeneID:885703"  
 /translation="MSFVITNPEALTVAATEVRRIRDRAIQSDAQVAPMTTAVRPPAADLVSEKAATFLVEYARKYRQTIAAAAV  
 VLEEFahalTTGADKYATAEADNIKTFS"  
 complement(2675881..2677359)  
 /gene="PE26"  
 /locus\_tag="Rv2519"  
 /note="Rv2519, (MTV009.04), len: 492 aa. PE26, Member of the M. tuberculosis PE family (see citation below), highly similar to many e.g. Q50630|YP91\_MYCTU|Rv2591|MT2668.1|MTCY 227.10c (543 aa),FASTA scores: opt: 848, E(): 3e-30, (39.55% identity in 445 aa overlap)."  
 /codon\_start=1  
 /transl\_table=11  
 /product="PE family protein PE26"  
 /protein\_id="YP\_177888.1"  
 /db\_xref="GI:57116998 GeneID:888172"  
 /translation="MSRLIVAPDWLASAAAEVQSIGSALSANAAAAAPTLLVAAAEDVSAAAAALFANYGREYQTLVSRFAS  
 LDQQFAQALNSAAASYQTAEATGASLVQTATQGVLGVINAPTEFMFGRSLIGDGDGTAASPIGEPGGILYDGGNGYSQTPPGA  
 VGGAGGSAGFIGNGGAGGAGGPGAGGGTGGGLGGWLGWNGGAAGTGDPVNVAVPLRVENNFPLVNLVNRGPTVPILLDTGSSSLV  
 IPFWKIGWQNLGLPTGFDVVHYNGVSIYADVPTTVDVFGGAATTPTSVHVIGILPYPRNLDLVLIASGGAFGPNNGILGIGP  
 NVGSYAVSGPGNVVTTDLPGQLNEGTLIDIPGGYMQFGPNTGTPITSVTGAPITVLNVQIGGYDPNGGYWSLPSIFDSGGNHGTL  
 PAVILGTGQTTGYAPPGTVISISIHNDQTLTYQYTTTASNTPVVTADPRLNTGLTPFLLGPVYISNNPSPGVTVVFNYP  
 PPP"  
 complement(2908393..2909220)  
 /gene="PE27"  
 /locus\_tag="Rv2769c"  
 /experiment="EXISTENCE: identified in proteomics study"  
 /note="Rv2769c, (MTV002.34c), len: 275 aa. PE27, Member of the Mycobacterium tuberculosis PE family (see citation below), highly similar to many (notably in N-terminal part) e.g. P96361|Rv1040c|MTCY10G2.09 from Mycobacterium tuberculosis (275 aa), FASTA scores: opt: 1111, E(): 5.9e-52, (68.55% identity in 283 aa overlap)."  
 /codon\_start=1  
 /transl\_table=11  
 /product="PE family protein PE27"  
 /protein\_id="YP\_177907.1"  
 /db\_xref="GI:57117023 GeneID:888461"  
 /translation="MSFLTTQPELAAAAGKLETIGSAMVAQNAAAAAPTGGVIPAADAISVLQAPLFTAYGTLYQQVSAEAA  
 AVYDLFVKTLGVSAGTYAATEAANSSAAASPLSGIASILGSTPGKVPSWISDIANIFNIGAGNWASAASDLLGLASGGLLPAAEE  
 AALEEGLEGAGLSELGAAEAAGEAPIAAGLGAAPLAAGLSRASSIGALSVPWSWAGQANLVSSTSTLQAGWTTAAPHGAAGTV  
 IPGMPGLASATRSSAGFGAPRYGAKPIVVPKPAV"  
 complement(3203035..3203121)  
 /gene="PE27A"  
 /locus\_tag="Rv3018A"  
 /note="Rv3018A, len: 28 aa. PE27A, Member of Mycobacterium tuberculosis PE family (see Brennan and Delogu, 2002), most similar to Rv0285 (102 aa), FASTA scores: opt: 147, E(): 3.5e-05, (92.85% identity in 28 aa overlap); etc."

/codon\_start=1  
 /transl\_table=11  
 /product="PE family protein PE27A"  
 /protein\_id="YP\_007411731.1"  
 /db\_xref="GI:448817858 GeneID:3205087"  
 /translation="MTLSVVPEGLAAASAAVEALTARLAAAH"  
 complement(3205385..3205699)  
 /gene="PE29"  
 /locus\_tag="Rv3022A"  
 /note="Rv3022A, len: 104 aa. PE29, Member of the Mycobacterium tuberculosis PE family (see Brennan and Delogu, 2002), similar to many others e.g. Rv0285|AL021930\_12 from Mycobacterium tuberculosis (102 aa), FASTA scores: opt: 497, E(): 3e-21, (80.39% identity in 102 aa overlap); etc."  
 /codon\_start=1  
 /transl\_table=11  
 /product="PE family protein PE29"  
 /protein\_id="YP\_177685.1"  
 /db\_xref="GI:57117050 GeneID:3205088"  
 /translation="MTLRVVPEGLAAASAAVEALTARLAAAHAGAAPAITAVVAPAADPVSLQSAVGFSALGSEHAAIAGEGVEE  
 LGRSGVAVGESGIGYAAGDAVAAATYLVSGGSL"  
 3673360..3673656  
 /gene="PE31"  
 /locus\_tag="Rv3477"  
 /experiment="EXISTENCE: identified in proteomics study"  
 /note="Rv3477, (MTCY13E12.30), len: 98 aa. PE31, Member of the Mycobacterium tuberculosis PE family (see Brennan & Delogu 2002), similar to O53941|Rv1791|MTV049.13 (99 aa),FASTA scores: opt: 373, E(): 4.3e-18, (64.65% identity in 99 aa overlap); MTCI364.07; MTCY21C12.10c; MTCY1A11.25c; MTC1A11.04; MTCY359.33; etc."  
 /codon\_start=1  
 /transl\_table=11  
 /product="PE family protein PE31"  
 /protein\_id="YP\_177975.1"  
 /db\_xref="GI:57117110 GeneID:888474"  
 /translation="MSFTAQPEMLAAAAGELRSLGATLKASNAAAAPVTTGVVPPAADEVSLLLLATQFRTHAATYQTASAKAAVI  
 HEQFVTTLATSASSYADTEAANAVVTG"  
 complement(3809929..3810228)  
 /gene="PE32"  
 /locus\_tag="Rv3622c"  
 /note="Rv3622c, (MTCY15C10.30), len: 99 aa. PE32, Member of the Mycobacterium tuberculosis PE family (see Brennan and Delogu, 2002), but no glycine rich C-terminus present. Similar to others e.g. O53938|Rv1788|MTV049.10 (99 aa),FASTA scores: opt: 376, E(): 7.1e-17, (65.6% identity in 96 aa overlap)."  
 /codon\_start=1  
 /transl\_table=11  
 /product="PE family protein PE32"  
 /protein\_id="YP\_177999.1"  
 /db\_xref="GI:57117136 GeneID:885712"  
 /translation="MSIMHAEPEMLAATAGELQSINAVARAGNAAVAGPPTGVVPAADLVSLLTASQFAAHAQLYQAI SAEAMA  
 VQEQLATTLGISAGSYAATEAANAATIA"  
 3839263..3839547  
 /gene="PE33"  
 /locus\_tag="Rv3650"  
 /note="Rv3650, (MTCY15C10.02c), len: 94 aa. PE33, Short protein, member of the Mycobacterium tuberculosis PE family (see Brennan and Delogu, 2002), but without the repetitive gly-rich region, similar to the N-terminal part of many e.g. O53809|Rv0746|MTV041.20 PGRS-family protein (783 aa),FASTA scores: opt: 363, E(): 2.1e-15, (76.55% identity in 81 aa overlap)."  
 /codon\_start=1  
 /transl\_table=11  
 /product="PE family protein PE33"  
 /protein\_id="YP\_178000.1"  
 /db\_xref="GI:57117138 GeneID:885832"  
 /translation="MSFVIAAPEALDSAATDLVVLGSLGAATAAAAAQTGTGIVAAAHDDEVSAIIAALFSAHGQAYQAASAQAAA  
 FHTRFIRARSRHPQQETTCRRVR"  
 complement(3942123..3942458)  
 /gene="PE34"  
 /locus\_tag="Rv3746c"  
 /note="Rv3746c, (MTV025.094c), len: 111 aa. PE34, Probable member of the

Mycobacterium tuberculosis PE family (see citation below), but without the glycine-rich C-terminal part, similar to N-termini of many e.g. O69737|Rv3872|MTV027.07 (99 aa) FASTA scores: opt: 306,E(): 1e-13, (50.5% identity in 99 aa overlap); O53215|Rv2490c|MTV008.46 (1660 aa) FASTA scores: opt: 125,E(): 0.99, (34.25% identity in 111 aa overlap). Also weakly similar to MTV008\_46; MTCI418B\_6; MTCY130\_1; MTY25D10\_11; MTCY1A11\_25; MTCY21B4\_13; MTCY21B4\_27; MTCY493\_2; MTCY28\_25; etc."

/codon\_start=1  
/transl\_table=11  
/product="Probable PE family protein PE34 (PE family-related protein)"  
/protein\_id="YP\_178011.1"  
/db\_xref="GI:57117152 GeneID:885764"  
/translation="MQSMSFDPVAVADIGSQVVNNAFQGLQAGAVAWVSLSSLLPAGAAEEVSAWAVTAFTTAAATGLLALNQAAQEE  
LRKAGEVFTAIARMYSADVRAAAACLLLEAIPRPGQTLARE"

CDS 4095182..4095481  
/gene="PE35"  
/locus\_tag="Rv3872"  
/experiment="EXISTENCE: identified in proteomics study"  
/note="Rv3872, (MTV027.07), len: 99 aa. PE35, Some similarity to Mycobacterium tuberculosis conserved PE family proteins (see Brennan & Delogu 2002), e.g. O69713|Rv3746c|MTV025.094c (111 aa), FASTA scores: opt: 306, E(): 5.5e-13, (50.5% identity in 99 aa overlap). Equivalent to AAK48354 from Mycobacterium tuberculosis strain CDC1551 (112 aa) but shorter 14 aa."

/codon\_start=1  
/transl\_table=11  
/product="PE family-related protein PE35"  
/protein\_id="YP\_178021.1"  
/db\_xref="GI:57117163 GeneID:886191"  
/translation="MEKMSHDPIAADIGTQVSDNALHGVTAGSTALTSVTGLVLPAGADEVSAQAATAFTSEGIQLLASNASAQDQ  
LHRAGEAVQDVARTYSQIDDDGAGVFAE"

CDS complement(4117892..4118125)  
/gene="PE36"  
/locus\_tag="Rv3893c"  
/note="Rv3893c, (MTCY15F10.19), len: 77 aa. PE36, Member of the Mycobacterium tuberculosis PE family of conserved proteins (see citation below), similar to others e.g. O53690|Rv0285|MTV035.13 from Mycobacterium tuberculosis (102 aa), FASTA scores: opt: 136, E(): 0.042, (35.6% identity in 73 aa overlap)."

/codon\_start=1  
/transl\_table=11  
/product="PE family protein PE36"  
/protein\_id="YP\_178025.1"  
/db\_xref="GI:57117167 GeneID:886213"  
/translation="MVWSVQPEAVLASAAAESAISAETEAAGAAPALLSTTPMGDPDSAMFSAALNACGASYLGVVAEHASQ  
RGLFAG"

misc\_feature complement(3186871..3187947)  
/gene="PPE47"  
/locus\_tag="Rv3021c"  
/note="Rv3021c, (MTV012.35c), len: 358 aa. PPE47, Member of Mycobacterium tuberculosis PPE family. Should be continuation of upstream ORF MTV012.36c but is frameshifted due to missing base at 36448 in v012. Sequence has been checked but no error apparent. Very similar to neighbouring ORF O53265|MTV012.32c|Rv3018c from Mycobacterium tuberculosis (434 aa), FASTA scores: opt: 1714, E(): 6.6e-770, (78.3% identity in 355 aa overlap) and AAK47430|MT3101 (strongly in the N-terminal part) (310 aa),FASTA scores: opt: 897, E(): 4.5e-37, (66.95% identity in 227 aa overlap)."  
/pseudogene="unknown"  
/db\_xref="PSEUDO:CCP45828.1"

misc\_feature complement(3187935..3188173)  
/gene="PPE48"  
/locus\_tag="Rv3022c"  
/note="Rv3022c, (MTV012.36c), len: 81 aa. PPE48, Member of M. tuberculosis PPE family with frameshift due to missing bp in codon 82. The ORF continues in downstream MTV012.35c. The sequence has been checked and no errors were detected. Identical to neighbouring ORF O53265|Rv3018c|MTV012.32c (434 aa), FASTA scores: opt: 526, E(): 6.2e-26, (100.0% identity in 81 aa overlap); and O69706|Rv739c|MTV025.087c (77 aa),FASTA scores: opt: 392, E(): 3.4e-18, (72.7% identity in 77 aa overlap)."  
/pseudogene="unknown"



CDS 105324..106715  
/gene="PPE1"  
/locus\_tag="Rv0096"  
/experiment="EXISTENCE: identified in proteomics study"  
/note="Rv0096, (MTCY251.15), len: 463 aa. PPE1, Member of the Mycobacterium tuberculosis PPE family, similar to many. A core mycobacterial gene; conserved in mycobacterial strains (See Marmiesse et al., 2004)."  
/codon\_start=1  
/transl\_table=11  
/product="PPE family protein PPE1"  
/protein\_id="YP\_177690.1"  
/db\_xref="GI:57116689 GeneID:886938"  
/translation="MAIPPEVHSGLLSAGCGPGSLLVAAQQWQELSDQYALACAELGQLLGEVQASSWQGTAAATQYVAAHGPYLA  
WLEQTAINSAVTAAQHVAAYCSALAAMPTPAELAAHAIHGVLIAITNFFGINTVPIALNEADYVRMWLQAADTMAAYQAVAD  
AATVAVPSTQPAPPPIRAPGGDAADTRLDLVSSIGQLIRDILDFIANPYKYFLEFFEQFGFSPAIVTVLALVALQLYDFLWYPYYA  
SYGLLLLFFFTPTLSALTALSALIHLLNLPAGLLPIAAALGPGDQWGANLAVAVTPATAAVPGGSPPTSNPAPAAPSSNSVGS  
SAAPGISYAVPGLAPPVSSGPKAGTKSPDTAADTLATAGAARPLARARRKRSESGVGIRGYRDEFLDATATVDAATDVPAPA  
NAAGSQGAGTLGFAGTAPTTSAAAGMVQLSSHSTSTTVPLLPPTTWTTDAEQ"

CDS complement(177543..179309)  
/gene="PE1"  
/locus\_tag="Rv0151c"  
/experiment="EXISTENCE: identified in proteomics study"  
/note="Rv0151c, (MTCI5.25c), len: 588 aa. PE1, Member of the Mycobacterium tuberculosis PE family (see citation below), with N-terminal region similar to others e.g. MTV032\_2 PE\_PGRS family from Mycobacterium tuberculosis (468 aa), FASTA scores: opt: 1125, E(): 0, (46.3% identity in 456 aa overlap); MTCY493\_24 from Mycobacterium tuberculosis FASTA score: (42.5% identity in 558 aa overlap). Also similar to upstream ORF MTCI5.26c FASTA score: (54.7% identity in 464 aa overlap). Also shows similarity to C-terminal part of some PPE family proteins e.g. MTV049\_21 from Mycobacterium tuberculosis FASTA score: (41.5% identity in 591 aa overlap)."  
/codon\_start=1  
/transl\_table=11  
/product="PE family protein PE1"  
/protein\_id="YP\_177695.1"  
/db\_xref="GI:57116694 GeneID:886857"  
/translation="MAPFGFTPKARHNRGVALRSTYRLDGVWMPVDKEGWGLSYVFAQPSVLAATAADLAGIGSAINQATAAVA  
APTTGLAAAADEVSTALATLFGAYQQFQAISAQVAAFHNEFTQRLAAAANAFVNAEATNTSALVQEATAGLKFKPTSPVLP  
FNQNTAIIMGGTGSPIPTPSYVNAITTLFIDPVVSNPVKALVTPEELYPIITGVKSLPFQTSVQLGLQILDGAIWEQINAGNHVT  
VFGYSQSAVIASLEMQHLISLGNAPSPSQLNFILIGNEMNPNNGILARIPGLNVTTLGLPFYGATPDNPYPTTTYTLEYDGFAD  
FRYPLNLVSDINAVFGILTVHTTYADLTPAQIASATQLPTQGTTSNTYIIETEHLPLLAPLRAIPVIGPPLAALVEPNLEIV  
NLGYGDPFRGYSTSPANVTPFGLFPDVPASVVADALVAGTQQGVNDFMVLPALNTLPTQTPMPAFPPYVPTLLPPPPPPQ  
PAT LINIADTFASVVSTGYSILPTADLGLAFVTILPAYDLTLFVNQLAAGNLRAAIELPLAATIGLAALGGMIEFIAIVVTLADITQ  
QLQSFSI"

CDS complement(307877..309547)  
/gene="PPE2"  
/locus\_tag="Rv0256c"  
/experiment="EXISTENCE: identified in proteomics study"  
/note="Rv0256c, (MTV034.22c), len: 556 aa. PPE2, Member of the M. tuberculosis PPE family, similar to many e.g. Rv0280, Rv0286, etc. Equivalent to Z98756|MLCB2492.30 from Mycobacterium leprae (572 aa), FASTA scores: opt: 1837, E(): 0, (62.9% identity in 461 aa overlap). A core mycobacterial gene; conserved in mycobacterial strains (See Marmiesse et al., 2004)."  
/codon\_start=1  
/transl\_table=11  
/product="PPE family protein PPE2"  
/protein\_id="YP\_177704.1"  
/db\_xref="GI:57116708 GeneID:886684"  
/translation="MTAPIWMASPEVHSAALLSSGPGPGPLLVSAGWHLSLSIAYAETADELAALLAAVQAGTWDGPTAAVYVAA  
HTPYLAWLVQASANSAMATRQETAATAYGTALAAMPTLAELGANHALHGVLMAITNFFGINTIPIALNESDYARMWIQAATTMAS  
YQAVSTAAVAAAPQTPAPQIVKANAPTAASDEPNQVQEWLQWLQKIGYTDYFNNVIQPFINWLTNLPFLQAMFSGFDPWLP  
SLG NPLTFLSPANIAFALGYPMDIGSYVAFLSQTFAFIGADLAAAFASGNPATIAFTLMFTTVEAIGTIIITDIALVKTLLEQTL  
LALL PAALPLLAAPLAPLTLAPASAAGGFAGLSGLAGLVGIPPSAPPVIPPVAAIAPSIPTPTPTPAPAPAPTAVTAPT  
PPPPPPPV TAPPVVTGAGIQSFGYLVGDLNSAAQARKAVGTGVRKKTPEPDSAEAPAAAAAPEEQVQPQRRRRPKIKQLGRG  
YEYLDLDPETG HDPTGSPQAGTLGFAGTTHKASPGQVAGLITLNPDAFGGSPRTPMMPGTWDTDSATRVE"

CDS 339364..340974  
/gene="PPE3"  
/locus\_tag="Rv0280"  
/experiment="EXISTENCE: identified in proteomics study"  
/note="Rv0280, (MTV035.08), len: 536 aa. PPE3, Member of the Mycobacterium

tuberculosis PPE family, similar to others e.g. Z80108|MTCY21B4\_4|Rv0453 from Mycobacterium tuberculosis (539 aa), FASTA scores: opt: 1131, E(): 0,(51.7% identity in 540 aa overlap)."

/codon\_start=1  
/transl\_table=11  
/product="PPE family protein PPE3"  
/protein\_id="YP\_177709.1"  
/db\_xref="GI:57116714 GeneID:886619"  
/translation="MTLWMASPEVHSALLSSGPGPGSVLSAAGVWSSLSAEYAAVADELIGLLGAVQGTGAWQGPSAAAYVAHA  
PYLAWLMRASETSAEAAARHETVAAAYTTAVAAMP TLVELAANHTLHGVLVATNFFGINTIPIALNEADYARMWTQAASTMATYQ  
AVAEAAVASAPQTTAPPILAAEAADDDHDDHDDHGGEPTPLDYLVAEILRIISGRLIWDPAEGTMNGIPFEDYTDAAQPIWWV  
VRAIEFVSKDFETVQELFVNPEAFQFYFELLDFYPTHIVQIVEALSQSPQLLVAVALGSVISNLGAVTGFAGLSGLAGMQPAAI  
PALAPVAAAPSTLPAVAMAPTMAAPGA AVASAAAPASAPAASTVASATPAPPPAPGAAGFGYPYAIAPPGIGFGSGMSASASAQR  
KAPQPDSDAAAAA AVRDQARARRRRRVTRRGYGDEFMDMNIDVDPDWGPPPGEDPVTSTVASDRGAGHLGFAGTARREAVADA  
AGMTTLAGDDFDGDPPTPMVPGSWDPDRDAPGSAEPGDRG"

CDS

349935..351476  
/gene="PPE4"  
/locus\_tag="Rv0286"  
/note="Rv0286, (MTV035.14), len: 513 aa. PPE4, Member of the Mycobacterium tuberculosis PPE family, similar to others e.g. AL0212|MTV012\_32 from Mycobacterium tuberculosis (434 aa), FASTA scores: opt: 958, E(): 0,(43.5% identity in 522 aa overlap)."

/codon\_start=1  
/transl\_table=11  
/product="PPE family protein PPE4"  
/protein\_id="YP\_177711.1"  
/db\_xref="GI:57116716 GeneID:886607"  
/translation="MAAPIWMASPEVHSALLSNGPSPGLVAAATAWSQLSAEYASTAAELSGLLGAVPGWAWQGPSAEWYVAA  
HLPYVAWLQASADAAGAAAQHEAAAAAYTTALAAMP TLAE LANHVIHTVLVATNFFGINTIPIITLNEADYVRMWLQAAAVMGL  
YQAASGAALASAPRTVPAPTVMNPGGGAASTVGAVNPWQWLLALLQQLWNA YTGFGWMLQLIWQFLQDP I GNSIKIIIAFLTNP  
IQALITYGPLL FALGYQIFFNLVGWPTWGMILSSPFLLPAGLGLGLAAIAFLPIVLAPAVIPPASTPLAAAAVAAGSVWPAVSMA  
VTGAGTAGAATPAAGAAPSAGAAPAPAPATASFAYAVGGSGDWGPSLGP TVGGRGGIKAPAATV PAAAAAATRGQSRARRRRR  
SELRDYGDEF LMDSDSGFGPSTGDHGAQASERGAGTLGFAGTATKERRVRAVGLTALAGDEFNGNPRMPMPVPGTWEQGSNEPEA  
PDGSGRGGGDGLPHDSK"

CDS

complement(366150..372764)  
/gene="PPE5"  
/locus\_tag="Rv0304c"  
/experiment="EXISTENCE: identified in proteomics study"  
/note="Rv0304c, (MTCY63.9c), len: 2204 aa. PPE5, Member of the Mycobacterium tuberculosis PE family (PPE, MPTR), similar to others e.g. Z95324|MTY13E10\_16 from Mycobacterium tuberculosis (1443 aa), FASTA scores: E(): 0,(50.6% identity in 1403 aa overlap); Y04H\_MYCTU|Q10778 from Mycobacterium tuberculosis (734 aa), FASTA scores: opt: 989, E(): 0, (42.3% identity in 522 aa overlap). This region is a possible MT-complex-specific genomic island (See Becq et al., 2007)."

/codon\_start=1  
/transl\_table=11  
/product="PPE family protein PPE5"  
/protein\_id="YP\_177714.1"  
/db\_xref="GI:57116719 GeneID:886592"  
/translation="MNLVSTTSGMSGFLNVGALGSGVANVGNITISGIYVNGTSDLSTPAVN SGLANIGTNIAGLLRDGAGTAAIN  
LGLANHG N LNVGFASLGGFNFGGATIGHNNVIGINTGIFDVGLANLGSYNI GFNLGDDNLGFGNFGSYNIGFNGVNDNLGFAN  
AGGGNIGFANTGSNNVGFNGTGSNNVIGLGTGNGQIGFNGSGSGNIGLFGNSGSNIGI GFFNFGSGNFGIANSGSFNTGIGNTGN  
TNTGLFNSGDVNTGAFNPGSFNTGSFNTGSFNTGGFNPNNTNYL NIGNYNTGIANIGTGDVDTGAFITGNYSNGLFLSGDYQGLV  
GLNLVIDMPLPISLGVNIPIDIPITASAGNITLGMVTI PPTGDIVLSS IAGQRAHF GPITIPNITVVGPTTTVAIGPNTAITIT  
GGGAIRIPLISIPAAPGFNSTTNPSSGFFNTGAGGASGFNGFGANS GFWNLASATSGASGLLNVGALGSGLANVGTTVSGFYN  
TSTSDLATPAFN SGLANISTSIAGLLRDSTGTMLVNLGLANHGTLNVGIANLGDYNI GFANLGSANFGSANIGGNNIGGANTGIF  
DIGLANLGSYNI GFNFGDDNLGFGNLGSYNVGFGNLGNDNLGFANTGSNNIGFANTGSNNIGLGTGQIGFGSLNSGSGNIG  
LFNSGSGNIGFNFSGNGNVGIGNTGTANFGLGNTGNTGFFNSGDVNTGIGNTGSFNTGSFNPGDSNTGDFNPGSYNTGLGNTG  
DVDTGAFISGSYSNGFLWSGNYQGLI GLHAALAIPEIALTFGVDIPIHIPINIDAGVVTLQGF SIVAENNIDFTPIIIPITINIT  
LPTAAITVGGPTTSIGITASAGISITIPIDIPATSGFNGSTTSPSSGFFNSGAGSASGFLNVVAGASGISGYLNVGALGSGVT  
NVGHTVSGFYNASALDLVTPAFASGLMRDGMGTMLNLGLANLGSNNAGFGNTGIFDVGVANLGNYNIGFNGFGDDNLGFANLGS  
YNIGVANTGSNNIGFANTGSNNIGLGTGTGQIGIGALNSGSGNIGLFGNSGDGNI GFFNFGSGTGNFGIGNTGTGNFGIGNSGSTST  
GLFNSGDGNTGGFNPGNFNTGNFNTGSFNTGGFNAGNTNTGHFNTGNYNTGIANIGTGDVSTGAFISGNYSNGLLWRGDYQGLIGYS  
YALTIPEIPAHLVDVNIPIIDIPITGSFTDLVVDNFTIPIIGFESFAFSFHIHTEPDIGPIIVPSFVLSVPTFAIAVGGPTTAINIS  
ATAGLGPITIPIDIPAAPGIGNSTTSPSSGFFNTGAGTASGFGNVGGNTSGLWNLASAASGV SGLLNVGALGSGVANVGNITISG  
IYNTSPLDLGTPAFGSGLANIAGLLQGGAGTTIIDL LAGLGNLNVGLANLGGSNFGIGNTGIFNVGFANVGNHNI GLANLGNYSVG  
FANSNGYHIGIANTGSANIGFANTGSGNIGLGTGTGQIGFGSFGNSGSHNIGLFGNSGDGNGVFFNFGTGNVIGNTGTANFGIAN  
SGSFNTGLGNTGSTNTGLFNPGNVNTGVGNTGSINTGSINTGSFNTGSTNTGSFNLGDHNTGSFNSGDYNTGYFNAGDYNTGVAN  
TGNVNTGAFISGNYSNGFFWRGDYQGLI GLSTTITPEIPYRYDLSVPIDIPITGTVVATTNPNSFTIPGFQIRVLLGPAAVLVNE

MIGPITIDVNQVIAIDSPIQQTISMVGTGGFGPIPIGIGISIGGTPGFGNSTGIPSSGFFHTGAGHVSGFNGFAGNMSGSGNFGAG  
NSGFFNAGGLGNSGLLNFGALQSGLANLGNITISGVYNTSTLDLATPAFNGSGIANIGANLAGLFLDNTGNLTLNFGVANQGGNLAG  
IGNLGSVNIIGFANTGNNNIGVGLTGNQIGIGSLNSGSSNIGIANTGIFDIGLANLGSYNIIGLANLGDNDLGFNAGSYNIGFANFG  
SDNLGFANTGSYNIIGFANTGNNNIGVGLTGNQIGIGSLNSGSSNIGIANTGIFDIGLANLGSYNIIGLANLGDNDLGFNAGSYNIGFANFG  
TGIGNAGSTNTGVFNPGDLNLTGSFNPFSFNTGGFNPFSGNTGYLNTGDYNTGVANTGDVDTGAFITGSYNSGFLVSGDYQGLIGL  
PLLGIPVTPGYFNLTGGPSSGFFNSGAGSVSGFVNSGAGLSGYLNTGALGSGVANVGNTISGWLNASALDLATPGFLSGIGNFGT  
NLAGFFRG"

CDS complement(372820..375711)  
/gene="PPE6"  
/locus\_tag="Rv0305c"  
/experiment="EXISTENCE: identified in proteomics study"  
/note="Rv0305c, (MTCY63.10c), len: 963 aa. PPE6, Member of the Mycobacterium tuberculosis PE family (PPE, MPTR), similar to others e.g. Y04H\_MYCTU|Q10778 from Mycobacterium tuberculosis (734 aa), FASTA scores: opt: 1340, E(): 0, (40.9% identity in 815 aa overlap)."  
/codon\_start=1  
/transl\_table=11  
/product="PPE family protein PPE6"  
/protein\_id="YP\_177715.1"  
/db\_xref="GI:57116720 GeneID:885978"  
/translation="MDFVVSAPFVNSLRMYLGAGSGPMLAAAAAWDGLADELAVAASWFGSVTSGLADAAWRGPAAVAMARAVAP  
YLGWLLISATAQAEQAAAQARVAVATFEAARAATVHPAIVAANRAVLVSLVSSNLLGFNAPAIATEAAYERMWAQDVAAMVGYHA  
GASAAVSALMPFTQQLKLAGLSERLTSAAAAAAGPPSAAGFNLGLANVGANNVGNVGVFNVGFGNLGSYNLGFANLGSNDL  
LANLGGHNIGFANTGSNNVGFNTGSNNVIGLGTGNQIGFSGFNSGSHNIGLFGNSGSGNVGLFNSGTGNFNGIGNSGTGNFGLGN  
TGSTNTGWFNNTGDVNTGGFNPFSYNTGNFNTGNYNNTGSFNAGNYNTGYFNTGDYNTGVANTGNVNTGAFIAGNYSNGVLWRGDYQ  
GLIGADIALEIPAIPINAQLFSMPIHQVMVMPGSVMTIPGMRLPFTSIVPFVYVYGPVELPQSTLTLPTVTITVGGPTTTIDGNL  
TGMVGVSIPLIKIPAAPGFNSTTSPSSGFFNAGAGTASGFGNFNGGGASGFWNLASATSGLSGFGNVGALGSGVANVGNTISGL  
YNTSTSNLATPAFNSGLLHHSVGTMTLNFGLANVGNNVGGANAGIFNVGLANLGDYNIIGFNLGGDNLGFAGHAGSYNIGFANTG  
SNLGFANTGDNNIGFANIGSNNIGLGTGSGQIGFGLNSGSHNIGLFGNSGSGNFNIGNAGTGNWIGNSGAGN  
FGIGNAGSTNTGLFNSGDLNLTGSLNPGSYNTGSVNTGSVNTGGFNAGNYNTGYFNTGDLQHRHGEHRQYQHRRFHLRQPQQRPSV  
AGRQPGSDRPRHRRHRSRNPDCERRREYPDSHTDHRQLHGHRIQRRARSSTEHSRHCYFFRTRRYRPLHRPSDNTDNRSHTCGHGGW  
THYRDQYRRHCGRRRHQHPDYPYSSDSRLRQLDRRTVVGLLQ"

CDS complement(424269..424694)  
/gene="PPE7"  
/locus\_tag="Rv0354c"  
/experiment="EXISTENCE: identified in proteomics study"  
/note="Rv0354c, (MTCY13E10.14c), len: 141 aa. PPE7, Member of the Mycobacterium tuberculosis PPE family, similar to others e.g. MTCY63\_9 from Mycobacterium tuberculosis (2411 aa), FASTA scores: E(): 3.6e-11, (47.6% identity in 103 aa overlap). Possible continuation of ORF upstream, but no sequence error apparent."  
/codon\_start=1  
/transl\_table=11  
/product="PPE family protein PPE7"  
/protein\_id="YP\_177720.1"  
/db\_xref="GI:57116725 GeneID:886498"  
/translation="MSVCVIYIPFKGCVKHVSVTIPITTEHLGPYEIDASTINPDQPIDTAFTQTLDFAAGSGTVGAFPPFGFGWQQ  
SPGFFNSTTTPSSGFFNSGAGGASGFLNDAAAVSGLGNVFTTETSGFFNAGGVGIRASKTSATCCRAGRT"

CDS complement(424777..434679)  
/gene="PPE8"  
/locus\_tag="Rv0355c"  
/experiment="EXISTENCE: identified in proteomics study"  
/note="Rv0355c, (MTCY13E10.15c, MTCY13E10.16c, MTCY13E10.17c), len: 3300 aa. PPE8, Member of the Mycobacterium tuberculosis PPE family, similar to others e.g. AL009198|MTV004\_5 from Mycobacterium tuberculosis (3716 aa), FASTA scores: opt: 2906, E(): 0, (40.9% identity in 3833 aa overlap); MTV004\_3 FASTA scores: (39.0% identity in 3531 aa overlap); etc. Gene contains large number of clustered Major Polymorphic Tandem Repeats (MPTR). Related to MTCY13E10.16c, E(): 0; MTCY13E10.17c, E(): 0; MTCY48.17, E(): 0; MTCY98.0034c, E(): 0; MTCY03C7.23 E(): 0; MTCY98.0031c, E(): 0; MTCY31.06c, E(): 5.6e-17; MTCY359.33, E(): 2.3e-16. Nucleotide position 426909 in the genome sequence has been corrected, A:C resulting in W2591G."  
/codon\_start=1  
/transl\_table=11  
/product="PPE family protein PPE8"  
/protein\_id="YP\_177721.2"  
/db\_xref="GI:448824742 GeneID:886491"  
/translation="MSFAVLPEINSARLYVAGLAPMLDAAAADGLADELGSAAASFSAVTAGLAGSSWLGAASTAMTGAAP  
YLGWLSAAAQAQQAATQTRLAAAFAEALAATVHPAII SANRALFVSLVSNLLGQNAPIATEAAYEQMWAQDVAAMFGYHA  
GASAAVSALTPFGQALPTVAGGALVSAQAQVTTVRNGLANVGEVGNVGNVGNFNLGSANIGNGNIGSGNIGSSNIGFNG  
VGPGLTAALNNIGFNTGSNNIGFNTGSNNIGFNTGDGNRIGLGTGSGLLGFGLNSGTGNIGLFGNSGTGNVIGNSGTGNWG

IGNSGNSYNTGFGNSGDANTGFFNSGIANTGVGNAGNYNTGYSYNTPGNSNTGGFNMQQYNTGYLNSGNYNTGLANSVNTGAFIT  
GNFNNGFLWRGDHQLIFGSPGFFNSTAPSSGFFNSGAGSAGFLNSGANSNGFFNSSSGAIAGNSGLANAGVLVSGVINTQNTV  
SGLFNMSLVAITTPALISGFFNTGNSMNSGFFGGPPVFNGLANRGRVNVNIGLGNANIIGNYILGSGNVGDFNIGLNSGNSQNLIGS  
GNVGSFNIGVFNVGSGLGNYNIGSGLGIYNIIGFNVGDYNVGFGNAGDFNQGFANTGNNNIGFANTGNNNIGIGLSGD  
NQQGFNIASGWNSGTGNSGLFNSGTNNVGI FNA GTGNVGIANS GTGNWIGINPGTDTNTGILNAGSYNTGILNAGDFNTGFYNTGS  
YNTGGFNVGNTTNTGNFVGD TNTGSYNPGDTNTGFFNPGNVNTGAFDTGDFNNGFLVAGDNQQAIDLSVTTTPIIPINEQMVID  
VHNVMTFGGNMITVTEASTVFPQTFFYLSGLFFFVNLASASTLTVPITITLTIGGPTVTVPI SIVGALESRTITFLKIDPAPGIGN  
STTNPSSGFFNSGTGGTSGFQNVGGSSGVWNSGLSSAIGNSGFQNLGSLQSGWANLGNVSVGFFNTSTVNLSTPANVSGLNNIG  
TNLSGVFRGPTGTIFNAGLANLQNLIGSANLGDNLGSGNVGSFNVFSGNQGSYNI GPANLGNYNIGFANLGNYNIGFNGAGDF  
NQGFANTGNNNIGFANTGNNNIGIGLSGDNQGFNFAGGWNSGTANIGL FNSGTNNVGI GNSGTGNWIGINS GSGNTGIGNTGST  
NTGFNTGIVNTGVANAGSYNTGWYNTGDTNTGIANLGD FNTGFYNTGNFSTGFANQGD IATGAFITGDMGNGAFWRGDQQGLFS  
AGYRVHVPEIPAHVTVFVPIPI TASFTNTVYSGITLEQINFGFTIDIAGI PLLAGAI SKAVLPPITGTGPAITVNI GIDPGGST  
AIRIPATASVGPFDVTFVNI AATTGFFNATTPSSGFFNNGGPGTVSGIANIGANISGFQNVANSATSGFN NYGSLQSGLANLGD  
VSGVFNTGIGAPANVSGMFNIGSNLAGFFHDQATGMSMFNLGLGNIGQFNVGFSNVGDSNAGLANIGSFNLGSGNLGSFNVFGGN  
QGSYNI GPANLGNYNIGLGNLGSYNTGFGNAGDFNLGFANTGNNNIGFANTGNNNIGIGLSGDNQGFNFAGGWNSGSGNSGLFN  
SGTNNIGL FNSGTGNIGINS GTGNWGIANTGDTNTGIFNTGDVNTGLLNAGNVNTGIFNTGHYNTGFSNAGSFNTAGFNPGSYN  
TGYLNTGSYNTGLANS GDVNTGGFITGNYSNFGFWWRGDYQGLAGISQITITVPTAVPVKLVHPIFLDIPVGTGLGFTTVHGRFP  
EITGDI FLIGIPFNAATLDAF SFPNISIVLPNIGINLGS GPDPLIDIAGTGGLLP IKIPLIDI PAAPGFNGSTTTPSSGFFNAGT  
GTVSGVGNVGSNSGFFNLTS GSSGISGVQNF GELISGGFNFGNTRVSGLVNASTLGLSMPANL SGGGNVGA TVAGFVNTQI LNL  
GFGVNSGSGNVGHGNI GDSNVGLGNLGNANVGHGNI GSFNVFSGNRVSYNI GPANLGNYNIGLGNLGSYNTGFGNAGDFNLGFANS  
GSNNIGFANTGNNNIGIGLSGHNQQGF GSWNSGTANTGL FNSGTNNIGL FNSGTGNIGINS GIGNTGIGNPGVNTGLGNSGTG  
NWGLWNPGTGNMGVANVGTYNTGGY NVGSTNTGIANVGIANTGSYNTGSTNTG SFNDGDFNTGFYNTGDYNTGFYNTGDVNTGAF  
IGGNF SNGAFWQSDHQQWGAHYAITVPQI PLLNFS LNIPVNIPIHLDFGT LAVNGFQIPAITLRALGVTHFSVGP IIVPRIAGT  
LPVIDINIGDPGGSSSIPITITTS GAGPVVIPLLDIPPAPGFNGSTTGPSSGFFNSGTGSSSGFGNVGANN SGFWNTAFAGIGNSG  
LQNFGLS QSGWANLGN TVSGFYNTSAADFATPANLSGLSNV GADLTGVL RGPNGSTFNAGLANLQFNVGSANLGSANLGSANLGS  
SANLGNVSGVFGNIGNANIGGANIGDFNVGIANTGPGLTAAVNNIGIGNTGNYNIGVNTGNYNIGFNTGNNNIGIGLSGDNQI  
GFGPLNAGIANMGLFNLGDNNFMANAGNFNQGIANTGNNNIGL FNTGNNVGI GLTG DGLSGFSSLNSGAGNTGFFNSGTANTG  
LFNSGTGNTGLFNSGTGNVGI GNMGTGGFGVGLSGDSQVIGGTNSG SFNIGL FNSGTGNVGI GNSGTGNVGI GNTGTGNTGIGN  
SGNYNTGLL NAGLVNTGIANPGNHNTGLFNIGTFNTGIANPGHYNTGSYNTGSYNTG MANAGDYGTGAFITGSMNGLLWRADRQ  
GLLAANYTITITIERPA AFLNVDIPVNIPI TGDITNVSIPAITFPRIDASGSVDIGILSGTVLAPVGPITLHGGDASAPLDTPIEID  
FGPSPA INLNIGKPDGSTVINIVGGAGAGPISIPIDLRPAPGFFNATTGPSSGFLNWGAGSASGLLNFNN SGLYNFATSSMGN  
SGFQNYGSLQSGWANLGN SISIYNTGLGAPANVSGLLNIGTNLAGWLQNGPTE TTFVGLANLGFWNLGSANIGNYNLGSANIG  
VYNLGSANIGDFNLGSANIGDFNLGSANIGSSNIGFNGVGPGLTAAIGNIGFNTGNGNIGIGNTGTGNIGFNTGNGNIGIGLT  
GDTMTGFGGWSNGTGNIGL FNSGTGNIGFNGS GTGNWIGINS GDYNTGIGNTGSTNSGFFNTGLVNTGIGNSGDYNTGLFNAGNT  
NTGSFNP GDYNTGGFNP GNYNTGYFNP GNSNTGIANS GDVNTGAFNSGNYSNFGFWWRGDYQGLGGFAYQSAVSEIPWSYDRFQH"

CDS complement (467459..468001)

/gene="PPE9"  
/locus\_tag="Rv0388c"  
/note="Rv0388c, (MTV036.23c), len: 180 aa. PPE9, Member of the Mycobacterium tuberculosis PPE family, highly similar to others e.g. MTCY10G2\_10|Z92539 from Mycobacterium tuberculosis (391 aa), FASTA scores: opt: 667, E(): 0, (58.3% identity in 180 aa overlap) but much shorter."  
/codon\_start=1  
/transl\_table=11  
/product="PPE family protein PPE9"  
/protein\_id="YP\_177724.1"  
/db\_xref="GI:57116729 GeneID:886439"  
/translation="MDFGALPPEINSARIYSGPGRPLMQAAAQWRLANELTATAASYSSVISGLTGDDWLGPSALSMAAAV  
YVAMRATAASAEQAAAQAVAAAAYESAYAAATVPPTVIAANRRRTMLSLVQTNVFGQNTPAIATSETHYEMWAHDILAMDGYAG  
ASGAASQLRRSPATGDHQGRVAE"

CDS complement (530751..532214)

/gene="PPE10"  
/locus\_tag="Rv0442c"  
/experiment="EXISTENCE: identified in proteomics study"  
/note="Rv0442c, (MTV037.06c), len: 487 aa. PPE10, Member of the Mycobacterium tuberculosis PPE family, nearly identical to hypothetical protein from Mycobacterium tuberculosis (strain Erdman) and to AN5S46909\_1 protein fragment from Mycobacterium bovis (302 aa); P42611|YHS6\_MYCTU hypothetical 50.6 kDa protein (517 aa), FASTA scores: opt: 3144, E(): 0, (98.4 identity in 492 aa overlap); and S46909|S46909\_1 (302 aa), FASTA scores: opt: 1897, E(): 0, (98.0% identity in 302 aa overlap). Nucleotide position 532097 in the genome sequence has been corrected, T:C resulting in K40E."  
/codon\_start=1  
/transl\_table=11  
/product="PPE family protein PPE10"  
/protein\_id="YP\_177726.2"  
/db\_xref="GI:448824744 GeneID:886340"  
/translation="MTSPHFALPPEINSALMFAGPGSGLIAAATAWGELAEELLASIASLGSVTSELTS GAWLGPSAAAMMAV  
ATQYLAWLSTAAAQAEQAAAQAMA IATAFEAALAATVQPAVVAANRGLMQLLAATNWFQONAPALMDVEAA YEQMWALDVAAMAG"

CDS

YHFDASAAVAQLAPWQQVLRNLGIDIGKNGQINLFGFNTGSGNIGNNNNIGSGNTGTGNIGSGNTGSGNLGGLNLDGNIG  
FGNTGSGNIGFGITGDHQMGFGFNSGSGNIGFGNSGTGNVGLFNSGSGNIGSGSLNSGIGTSGTINAGLGSAGSLNTSFWN  
AGMQNAALGSAAGSEAAALVSSAGYATGGMSTAALSSGILASALGSTGGGLQHGLANVLNSGLTNTTPVAAPASAPVGGGLDSGNPNPG  
SGSAAAGSGANPGLRSPGTSYPSFVNSGSNDGSLRNTAVREPSTPGSGIPIKSNFYSPDRESAYASPRIGQPVGSE"  
543174..544730  
/gene="PPE11"  
/locus\_tag="Rv0453"  
/experiment="EXISTENCE: identified in proteomics study"  
/note="Rv0453, (MTV037.17), len: 518 aa. PPE11, Member of the Mycobacterium  
tuberculosis PPE family, similar to many e.g. AL0212|MTV012\_32 from Mycobacterium  
tuberculosis (434 aa), FASTA scores: opt: 882, E(): 7e-31, (41.8% identity in 514 aa  
overlap)."  
/codon\_start=1  
/transl\_table=11  
/product="PPE family protein PPE11"  
/protein\_id="YP\_177727.1"  
/db\_xref="GI:57116732 GeneID:886317"  
/translation="MTSALIWMASPPPEVHSALLSSGPGPGPVLAATGWSSLGREYAAVAEELGALLAAVQAGVWQGPSAESFAA  
ACLPLYLSWLTQASADCAAAAARLEAVTAAYAALVAMPTLAEELANHATHGAMVATNFFGINTIPIAVNEADYVRMWLQAATTMA  
TYQAVADSAVRSIPDSVPPRILKSNAQSQHSSNNSSGADPVDDFIAEILKIIITGRVIVDPEAGTVNGLPYDAYTNPGLMWW  
IARSLLELLQDFQEFKLLFTNPVKAFQFLVDLILFDWPTHMLQLATWLAENPQLLVAALTPAISGLGAVSGLAGLTGLVPPV  
PAPAPDAVVPTVPLAGTATPTTAPASAPAAGAAGPPAGTATATSASVPTSAGGFPPYLVGSGPIDFDAGTPAGSRRAQPAAD  
NVTAVAAAQVSARHQARRRRRAAAKERGNADEFVDMDSGPAIPPSGERDAWASNSGVGGLGFAGTASNETVAAPAGLTTLADDEF  
QCGPRMPMLPGAWDLGTWDRGD"

CDS

complement(848103..850040)  
/gene="PPE12"  
/locus\_tag="Rv0755c"  
/experiment="EXISTENCE: identified in proteomics study"  
/note="Rv0755c, (MTV041.29), len: 645 aa. PPE12, Member of the Mycobacterium  
tuberculosis PPE family, highly similar to others e.g. Z82098|MTCY3C7\_23 from  
Mycobacterium tuberculosis (582 aa), FASTA scores: (56.1% identity in 636 aa  
overlap); Z92774|MTCY6G11\_5 from Mycobacterium tuberculosis (552 aa), FASTA scores:  
(55.8% identity in 590 aa overlap); etc. Predicted to be an outer membrane protein  
(See Song et al., 2008)."  
/codon\_start=1  
/transl\_table=11  
/product="PPE family protein PPE12"  
/protein\_id="YP\_177753.1"  
/db\_xref="GI:57116777 GeneID:888708"  
/translation="MVGFAWLPPETNSLRMYLGAGSRPLLAAGAWDGLAEELHAAAASSFGSVTSELAGGAWQGPASAAMANAAG  
PYASWLTAAGAQAELAARQARAAAAGAFEEALAGVHVAVQANRVRTWLLAVSNVFGQNAPAIAMESTYEQMWAQDVAVMAGYH  
AASSAAAQLASWQPALPNINLGVGNIGNLVGNNGTGDYNLGNLGNANFNGGNGSAFHGQISSFNVGSGNIGNFNLGSGNGN  
VGIGPSSFNVGSGNIGNANVGGNSGDNNFNGFNANIGIGNAGPNMSSPAVPTPGNNGVIGNGGNGNFGGNTGNANIGLG  
NVGDGNVGFNGSGSYNFGFNGTGNNNIGIGLTSNQIGFGLNSGSGNIGFGNSGTGNIGFFNSGSGNFGVGNISVNTGVANS  
NINTGFGNSGFINTGFGNALSNTGFGNSGQANTGIGNAGDFNTGNFNNGGIINTGSGFNSGAFNSGSGFNGGDANSGLNLSGLTNTG  
FANSNINTGGFNAGLNTGFNTTDGLGENSGFNGAGSGNSGFNNSGRGNSGAQNVGNLQISGFANSQSVTGYNNSVSVTSGF  
GNKGTGLFSGFMSGFGNTGFLQSGFGNLEANPDNNSATSGFGNSGKQDSGGFNSIDFVSGFFHR"

CDS

complement(976872..978203)  
/gene="PPE13"  
/locus\_tag="Rv0878c"  
/note="Rv0878c, (MTCY31.06c), len: 443 aa. PPE13, Member of the Mycobacterium  
tuberculosis PPE family, highly similar to many e.g. P4261|YHS6\_MYCTU (517 aa), FASTA  
scores: opt: 1044, E(): 0, (47.4% identity in 397 aa overlap); MTV014\_3,MTCI65\_2,  
MTCY98\_24, MTCY3C7\_23, MTCY48\_17, MTV004\_5,MTV004\_3, etc. Predicted to be an outer  
membrane protein (See Song et al., 2008)."  
/codon\_start=1  
/transl\_table=11  
/product="PPE family protein PPE13"  
/protein\_id="YP\_177764.1"  
/db\_xref="GI:57116794 GeneID:885617"  
/translation="MNFVVLPPPEVNSARIYAGAGPAPMLAAAVAWDGLAEELGMAAASFSLISGLTAGPGSAWQGPAAAAMAAA  
AAPYLSWLNAAATARAEGAAAGAKAAAAYEAAARAATAHPALVAANRNQLLSLVLNSLFGQNLPAIAATEASYEQLWAQDVAAMVG  
YHGGASTVASQLTPWQQLLSVLPVVTAAAPAGAVGVAALAI PALGVENIGVGNFLGIGNIGNNNVSGNTGDNFNGIGNIGNAN  
LGNGNIGNANLGSNAGFFNFNGNDGNTNFGSGNAGFLNIGSGNEGSGNLGFGNAGDDNTGWGNSGDNTTGGFNSGDLNTGIGS  
PVTQGVANSFGNTGTGHSGFFNSGNSGSGFQNLNGSSGFGNASDTS SGFQNACTALTRASSTWADSPRAWPIRAP SRLQVWRT  
RATTARECSIRVVISRVSSSTGAPPQKKVGNNSG"

CDS

complement(1020058..1021329)  
/gene="PPE14"  
/locus\_tag="Rv0915c"

```

/gene_synonym="MTB41"
/inference="protein motif:PROSITE:PS00626"
/note="Rv0915c, (MTCY21C12.09c), len: 423 aa. PPE14 (alternate gene name: MTB41). Member of the Mycobacterium tuberculosis PPE family (see citation below), highly similar to many e.g. Rv1807 from Mycobacterium tuberculosis (403 aa), FASTA scores: opt: 966, E(): 4.4e-30, (45.7% identity in 392 aa overlap); etc. Contains PS00626 Regulator of chromosome condensation (RCC1) signature 2."
/codon_start=1
/transl_table=11
/product="PPE family protein PPE14"
/protein_id="YP_177765.1"
/db_xref="GI:57116795 GeneID:885069"
/translation="MDFGLLPPEVNSSRMYSYSGPPEMLAAAAAWDGVAAELTSAAVSYGSVSTLIVEPWWGPAAMAAAATP
YVWGLAATAALAKETATQARAAAEAFGTAFAMTVPPSLVAANRSLMSLVAANILGQNSAAIAATQAEYAEMWAQDAAVMYSYEG
ASAAASALPPFTPPVQGTGPAGPAAAAAATQAAGAGAVADAQATLAQLPPGILSDILSALANADPLTSGLLGIASLTNPQVGS
QPIVIPTPIGELDVIALYIASIATGSIALAITNTARPWHLGILYGNAGGLGPTQGHPLSSATDEPEPHWGPFGGAAPVSAGVGHAA
LVGALSVPHSWTTAAPEIQLAVQATPTFSSSAGADPTALNGMPAGLLSGMALASLAARGTTGGGGTRSGTSTDGQEDGRKPPVVV
IREQPPPGNPPR"
CDS complement(1161297..1162472)
/gene="PPE15"
/locus_tag="Rv1039c"
/experiment="EXISTENCE: identified in proteomics study"
/note="Rv1039c, (MTCY10G2.10), len: 391 aa. PPE15, Member of the Mycobacterium tuberculosis PPE family of glycine-rich proteins, most similar to Rv2768c|AL008967|MTV002_33 Mycobacterium tuberculosis H37Rv (394 aa), FASTA scores: opt: 1721, E(): 0, (70.4% identity in 398 aa overlap)."
/codon_start=1
/transl_table=11
/product="PPE family protein PPE15"
/protein_id="YP_177778.1"
/db_xref="GI:57116813 GeneID:888477"
/translation="MDFGALPPEINSARMYAGAGAGPMMMAAGAAWGLAAELGTTAASYESVITRLTTESWMPASAMVAAAQP
YLAWLTYTAEAAAHAGSQAMASAAAYEAYAMTVPEVVAANRALLAALVATNVLGINTPAIMATEALYAEMWAQDALAMYGYAA
ASGAAGMLQPLSPPSQTTNPGGLAAQSAAVGSAATAAVNQVSVADLISSLNAVSGLASPVTSVLDSTGLSGI IADIDALLATP
FVANI INSAVNTAAWYVNAAIPTAIFLANALNSGAPVAIAEGAIEAAEGAASAAAAGLADSVTPAGLGASLGEATLVGRLSVPAA
WSTAAPATTAGATALEGSWTVAAEEAGPVTGMMPGMSAAKGTGAYAGPRYGFKPTVMPKQVVV"
CDS complement(1262272..1264128)
/gene="PPE16"
/locus_tag="Rv1135c"
/note="Rv1135c, (MTCI65.02c), len: 618 aa. PPE16, Member of the Mycobacterium tuberculosis PPE family of glycine-rich proteins. Similar to Rv2356c (59.6% identity in 627 aa overlap); etc.. Predicted to be an outer membrane protein (See Song et al., 2008)."
/codon_start=1
/transl_table=11
/product="PPE family protein PPE16"
/protein_id="YP_177790.1"
/db_xref="GI:57116833 GeneID:885131"
/translation="MSFLVLPPEVNSALMFAGAGSGPTLAAAAAWDGLAAELGQAANSFSSATAALADTAWQGPAAATAMAAAAAP
YASWLSTAATRALSAQAQAKAAAAYEAAARAATVDPDLLVAANRHQLVSLVLSNLFQGNAPAIATEAAEYQLWAADVAAMVSYHS
GASAVAAQLAPWAQAVRALPNPTAPALASGPAALAI PALGIGNTGIGNIFSIGNIGDYNLNGNGNTGNANLGSNGTGOANLGSNGT
GFFNFSGNTANTNFGSGNLGNLNLGSGNDGNGNFGNLGNI GDGNRGSNGVGSFNFGTANAGSFNVGSANHGSPNVGFANLGNLNL
GIANLGNLNLGIANLGNLNLGIGLGTGDNMIGIGALNSGIGNLGFNGSNNNIGLNFNSGNNNIGFFNSGDSNF GFFNSGDTNTGFG
NAGFTNTGFGNAGSGNFGFGNAGNNGNFGFNGSGFENMGVGNLSGAYNTGSFNSGTLNLTGDLNSGDFNTGWANSGDINTGGFHSGDL
NTGFGSPVDQPVMSGFGNIGTGNSGFNNSGDSANSFQNTNTGAFFIGHSGLLNSGGGQHVIGISNSGTGFNTGLFNTGFNNTGIG
NSATNAAF'TTSGVANSGDNSSGGFNAGNDQSGFFDG"
CDS complement(1298764..1299804)
/gene="PPE17"
/locus_tag="Rv1168c"
/note="Rv1168c, (MTV005.04c), len: 346 aa. PPE17, Member of the Mycobacterium tuberculosis PPE family of glycine-rich proteins, similar to many e.g. E332789|Z98268|MTCI125.27C (385 aa), FASTA scores: opt: 504, E(): 0, (36.6% identity in 388 aa overlap)."
/codon_start=1
/transl_table=11
/product="PPE family protein PPE17"
/protein_id="YP_177791.1"
/db_xref="GI:57116836 GeneID:885990"
/translation="MDF'TIFPPEFNSLNIQGSARPFLVAANAWKNLSNELSYAASRFESEINGLITSWRGPSSTIMAAVAPFRA

```

WIVTTASLAELVADHISVAGAYEAAHAAHVPLPVIETNRLTRLALATTNIFGIHTPAIFALDALYAQYWSQDGEAMNLYATMAA  
AAARLTPFPSPAPIANPGALARLYELIGSVSETVGSFAAPATKNLPSKLTWLLTKGTYPPLTAARISSIPVEYVLAFFVEGSNMGQM  
MGNLAMRSLTPTLKGPLELLPNAVRPAVSATLGNADTIGGLSVPPSWVADKSITPLAKAVPTSAPGGPSGTSWAQLGLASLAGGA  
VGAVAARTRSGVILRSPAAG"

CDS

1339349..1340524  
/gene="PPE18"  
/locus\_tag="Rv1196"  
/gene\_synonym="mtb39a"  
/experiment="EXISTENCE: identified in proteomics study"  
/note="Rv1196, (MTCI364.08), len: 391 aa. PPE18 (alternate gene name: mtb39a). Member of the Mycobacterium tuberculosis PPE family of glycine-rich proteins, highly similar to others e.g. Y07P\_MYCTU|Q11031 hypothetical 40.0 kDa protein cy02b10.25c (396 aa), FASTA scores: opt: 2124,E(): 0, (85.1% identity in 397 aa overlap). Note that expression of Rv1196 was demonstrated in lysates by immunodetection (see Dillon et al., 1999)."  
/codon\_start=1  
/transl\_table=11  
/product="PPE family protein PPE18"  
/protein\_id="YP\_177795.1"  
/db\_xref="GI:57116841 GeneID:886073"  
/translation="MVDGALPPEINSARMYAGPGSASLVAAAQMWDSVASDLFSAASAFQSVVWGLTVGSWIGSSAGLMVAAAS  
PYVAWMSVTAGQAELTAAQVRVAAAAYETAYGLTVPPPVIAENRAELMILIATNLLGQNTPAIAVNEAEYEMWAQDAAAMFGYA  
AATATATATLLPFEEAPEMTSAGGLLEQAAAVEEASDTAAANQLMNNVPQALQQLAQPTQGTTPSSKLGGLWKTVSPHRSPISNM  
VSMANNHMSMTNSGVSMNTLSSMLKGFAPAAAAQAVQTAQNGVDRAMSSLSLSSGLGGGVAANLGRAASVGSLSVPAQAWAA  
ANQAVTPAARALPLTSLTSAERGPQMLGGLPVGQMGARAGGGLSGVLRVPPRPYVMPHSPAAG"

CDS

complement(1532443..1533633)  
/gene="PPE19"  
/locus\_tag="Rv1361c"  
/gene\_synonym="mtb39b"  
/experiment="EXISTENCE: identified in proteomics study"  
/inference="protein motif:PROSITE:PS00501"  
/note="Rv1361c, (MTCY02B10.25c), len: 396 aa. PPE19 (alternate gene name: mtb39b). Member of the Mycobacterium tuberculosis PPE family of glycine-rich proteins, highly similar to many e.g. Rv1196|MTCI364.08|PPE18, FASTA scores: E(): 0, (84.9% identity in 397 aa overlap); MTCY274.23c (42.3% identity in 416 aa overlap); etc. Contains PS00501 Signal peptidases I serine active site. Note that expression of Rv1361c was demonstrated in lysates by immunodetection (see Dillon et al., 1999). A core mycobacterial gene; conserved in mycobacterial strains (See Marmiesse et al., 2004)."  
/codon\_start=1  
/transl\_table=11  
/product="PPE family protein PPE19"  
/protein\_id="YP\_177801.1"  
/db\_xref="GI:57116852 GeneID:886819"  
/translation="MVDGALPPEINSARMYAGPGSASLVAAAKMWDSVASDLFSAASAFQSVVWGLTTGSWIGSSAGLMVAAAS  
PYVAWMSVTAGQAELTAAQVRVAAAAYETAYGLTVPPPVIAENRAELMILIATNLLGQNTPAIAVNEAEYEMWAQDAAAMFGYA  
ATAATATEALLPFEDAPLITNPGGLLEQAVAVEEAI DTAAANQLMNNVPQALQQLAQPTKSIWPFQDLSLWKAISPHLSPLSNI  
VSMNNHVSMTNSGVSMASLHSMKGFAPAAAQAVETAQNGVQAMSSLSLSSGLGAGVAANLGRAASVGSLSVPAQAWAA  
WAAANQAVTPAARALPLTSLTSAQTAPGHMLGGLPLGQLTNSGGGFGGVSNALRMPPRAYVMPRVPAAG"

CDS

1561769..1563388  
/gene="PPE20"  
/locus\_tag="Rv1387"  
/experiment="EXISTENCE: identified in proteomics study"  
/inference="protein motif:PROSITE:PS00343"  
/note="Rv1387, (MTCY21B4.04), len: 539 aa. PPE20, Member of Mycobacterium tuberculosis PPE family of proteins, similar to many e.g. Y05F\_MYCTU|Q10892 hypothetical 46.9 kd protein cy251.15 (463 aa), FASTA scores: E(): 4.2e-26, (37.7% identity in 531 aa overlap); similar also to MTCY274.23c (37.5% identity in 168 aa overlap). Contains PS00343 Gram-positive cocci surface proteins 'anchoring' hexapeptide. A core mycobacterial gene; conserved in mycobacterial strains (See Marmiesse et al., 2004)."  
/codon\_start=1  
/transl\_table=11  
/product="PPE family protein PPE20"  
/protein\_id="YP\_177806.1"  
/db\_xref="GI:57116858 GeneID:886784"  
/translation="MTEPWIAFPPEVHSAMLNYGAGVGPMLISATQNGELSAQYAEAASEVEELLGVVASEGWQQAEEAFVAA  
MPFLAWLIQASADCVEMAAQQHVVEIAYTAAVELMPTQVELAANQIKLAVLVATNFFGINTIPIAINEAEYEMVWRAATTMATY  
STVRSALSAMPHTSPPPLILKSDLELLPDTGEDSDGHNHGGHSHGGHARMIDNFFAEILRGVSAGRIWDPVNGTLNGLDYDD  
YVYPGHAIWLLARGLEFFQDGEQFGELLFTNPTGAFQFLLYVVVVVLDLPHTHIAQIATWLGQYPLLSSAALTGVIAHLGAITGLAGL

SGLSAIPSAAIIPAVVPELTPVAAAPPMLAVAGVGPVAVAAPGMLPASAPAPAAAAGATAAGPTPPATGFGGFPYLVGGGGPGIGF  
 GSGQSAHAKAAASDSAAAESAAQASARAQARAARRGRSAKARGHRDEFVMTDMGFDAAAPAPEHQPGARASDCGAGPIGFACTV  
 RKEAVVKAAGLTTLAGDDFGGGPTMPMPGTWTHDQGVFDEHR"  
 CDS complement(1751297..1753333)  
 /gene="PPE21"  
 /locus\_tag="Rv1548c"  
 /experiment="EXISTENCE: identified in proteomics study"  
 /note="Rv1548c, (MTCY48.17), len: 678 aa. PPE21, Member of the Mycobacterium tuberculosis PPE family, similar to several e.g. YHS6\_MYCTU|P42611 hypothetical 50.6 kDa protein in hsp65 3' region (517 aa), FASTA scores: opt:1142, E(): 0, (40.6% identity in 616 aa overlap); also similar to MTCY31.06c (54.9% identity in 381 aa overlap). Predicted to be an outer membrane protein (See Song et al.,2008)."  
 /codon\_start=1  
 /transl\_table=11  
 /product="PPE family protein PPE21"  
 /protein\_id="YP\_177817.1"  
 /db\_xref="GI:57116882 GeneID:886384"  
 /translation="MNFVSLPPEINSALMFAGAGPGLMAAASAWTGLAGDLGSAASFSAVTSQLATGSWQGPASAAMTGVAA  
 YARWLTTAAQAQEAQAAVSAFEAALAATVHPGAVSANRGRRLSLVASNLLGNAPAIAAVEAVYEQMWAADVAAMLYHG  
 EASAVALSPTPTSPSAAATPGGAVIIAGFPFLDLGNVTIGGFNLASGNLGLGNLGSFNPGSANTGSVNLGNANIGDLNLGSGN  
 IGSYNLGGGNTGDLNPDGNTGTLNWGSGNIGSYNLGGNLGSGYNLGSNTGDTNFGGGNTGNLNVGGGNTGNSNFGFGNTGNVN  
 FGNGTGDNTFGSGNLGSGNIGFGNKGSHNIGFGNSGNNNIGFGLTGDNQIGFGALNSGSGNLGFGNSGNGNIGFFNSGNNNIGM  
 GNSGNGVGALESVEFGSSAERSGFGNSGELSTGIGNSGQLSTGWFNSTATTSTGWFNSTTTNTGWFNSTTTNTGIGNSGGLVTVGS  
 MGLFNSGHTNTGSFNAGSMNTGDFNSGNVNTGYFNNGNINTGFFNSGDLNTGLFNSVNPVQNSGWLHTGTNNSGYANAGTFNSG  
 FDNARDEHAEFVTGNSGLANVGNYNAGIINVGDHLSGFRNSVPTITGTANISGFVNAGTISISGFFNFGSLMSGFANFDDEVSGY  
 LNGDSRASGWIH"  
 CDS complement(1931497..1932654)  
 /gene="PPE22"  
 /locus\_tag="Rv1705c"  
 /experiment="EXISTENCE: identified in proteomics study"  
 /note="Rv1705c, (MTCI125.27c), len: 385 aa. PPE22, Member of the Mycobacterium tuberculosis PPE family of glycine-rich proteins, similar to many e.g. YX23\_MYCTU|Q10813 hypothetical 41.1 kDa protein cy274.2 3 (404 aa), fasta scores: opt: 819, E(): 0, (46.2% identity in 413 aa overlap)."  
 /codon\_start=1  
 /transl\_table=11  
 /product="PPE family protein PPE22"  
 /protein\_id="YP\_177827.1"  
 /db\_xref="GI:57116898 GeneID:885068"  
 /translation="MDFGALPPEVNSGRMYCGPGSAPMVAAAASAWNGLAAELSVAAVGYERVITTLQTEEWLGPASTLMVEAVAP  
 YVAWMRATAIQAEQAASQARAAAAAYETAFAAIVPPPLIAANRRLTSLVTHNVFGQNTASIAATEAQYAEMWAQDAMAMYGYAG  
 SSATATKVTPFAPPNTTSPSAAATQLSAVAKAAGTSAGAAQSAIAELIAHLPTLLGLTSPLSSALTAATPGWLEWFINWYLP  
 ISQLFYNTVGLPYFAIGIGNSLITSWRALGWIGPEAAEAAAAAPAAVGAAVGGTGPVSAGLGNAAATIGKLSLPPNWAGASPSLAP  
 TVGSASAPLVSDIVEQPEAGAAGNLLGGMPLAGSGTGTGGAGPRYGRFVTVMSRPPFAG"  
 CDS complement(1932694..1933878)  
 /gene="PPE23"  
 /locus\_tag="Rv1706c"  
 /experiment="EXISTENCE: identified in proteomics study"  
 /note="Rv1706c, (MTCI125.28c), len: 394 aa. PPE23, Member of the Mycobacterium tuberculosis PPE family of glycine-rich proteins, similar to many e.g. YX23\_MYCTU|Q10813 hypothetical 41.1 kDa protein cy274.23 (404 aa), fasta scores: opt: 841, E(): 3.9e-31, (46.8% identity in 408 aa overlap)."  
 /codon\_start=1  
 /transl\_table=11  
 /product="PPE family protein PPE23"  
 /protein\_id="YP\_177828.1"  
 /db\_xref="GI:57116899 GeneID:885070"  
 /translation="MTLDVPVNQGHVPPGVSACCLVGVTAVADGIAGHSLSNFGALPPEINSGRMYSGPGSGPLMAAAAWDGLA  
 AELSSAATGYGAAISELTNMRWWSGSPASDSMVAAVLPFVGLSTTATLAEQAAMQARAAAAAFEAAFAMTVPPPAIAANRTLLMT  
 LVDTNWFGQNTPAIATTESQYAEMWAQDAAAMYGYASAAAPATVLTTPFAPPQTTNATGLVGHATAVAALRGQHSWAAAIPWSDI  
 QKYWMFLGALATAEGFIYDSGLTLNALQFVGGMLWSTALAEAGAAEAAAGAGGAAGWSAWSQLGAGPVAASATLAAKIGPMSV  
 PPGWSAPPATPQAQTVARSIPGIRSAAEAAETSVLLRGAPTTPGRSRAAHMGRRYGRRLTVMADRPNVG"  
 CDS complement(1981614..1984775)  
 /gene="PPE24"  
 /locus\_tag="Rv1753c"  
 /experiment="EXISTENCE: identified in proteomics study"  
 /note="Rv1753c, (MTCY28.16c), len: 1053 aa. PPE24, Member of the Mycobacterium tuberculosis PPE family of Gly-,Asn-rich proteins, similar to many e.g. YF48\_MYCTU|Q10778 hypothetical protein cy48.17 (678 aa), FASTA scores: opt: 1360,



E(): 0, (48.9% identity in 550 aa overlap). Note that the Gly-, Asn-rich sequence is interrupted by six near-perfect 26 aa repeats, a unique region, and another, more degenerate region of five 25 aa repeats before resuming at the C-terminus. The end of the first Gly-, Asn-rich region and the start of the first set of repeats shows some similarity to Q50577|AT10S from Mycobacterium tuberculosis (170 aa) (40.2% identity in 189 aa overlap)."

```
/codon_start=1
/transl_table=11
/product="PPE family protein PPE24"
/protein_id="YP_177830.1"
/db_xref="GI:57116904 GeneID:885544"
/translation="MNFSLVLPPEINSALIFAGAGPEPMAAAATAWDGLAMELASAAASFSGSVTSGLVGGAWQGASSSAMAAAAAP
YAAWLA AAAAVQAEQTAAQAAAAMIAEFAVKTA VVQ PMLVAANRADLVSLVMSNLFGQNAPAI AAEIATYE QMWAADVSAMSAYHA
GASAIASALSPFSKPLQNLGLPAWLASGAPAAAMTAAAGIPALAGGPTA INLGIANVGGNGVGNANGLANIGNANLGNYNFGS
GNFGNSNIGSASLGNNNIGFNLGNNVGVGNLGNLNTGFANTGLGNFGFGNTGNMNIIGILGTGNNQIGIGGLNSGTGNFGLFNS
GSGNVGFFNSGNGNFGIGNSGNFNTGGWNSGHGNTGFFNAGSFNTGMLDVGNAVNTGSLNTGSGYNGMDFNPGSSNTGTFNTGNANT
GFLNAGNINTGVFNIGHMNNGLFNTGDMNNGVYFRGVGQGSLSQFSITTPDLTLPPLQIPGISVPAFSLPAITLPSLNIPAAATTPA
NITVGA FSLPGLTLP SLNIPAAATTPANITVGA FSLPGLTLP SLNIPAAATTPANITVGA FSLPGLTLP SLNIPAAATTPANITVGA F
SLPGLTLP SLNIPAAATTPANITVGA FSLPGLTLP SLNIPAAATTPANITVGA FSLPGLTLP SLNIPAAATTPANITVGA FSLPGLTLP
EVTIPLQITIPAGITIGGFSLPALHTQPITVGVQIGVQGFGLPSIGWDFVFLSTPRITVPAFGIPFTLQFQTNVPALQPPGGGLSTFT
NGALIFGEFDLPQLVHPYTLTGPIVIGSFFLPAFNIPGIDVPAINVDGFTLPQITTPAITTPEFAIPPIGVGGFTLPQITTQEI
ITPELTINSIGVGGFTLPQITTPITTPPLTIDP INLTGFTLPQITTPITTPPLTIDP INLTGFTLPQITTPITTPPLTIEPI
GVGGFTTPPLTVPGIHLPSTTIGAFaipggpgyfnssstapssgffnsgaggngsgfgmngsglsgwfnntnpagllggsgyqnfnggl
SSGFSNLGSGVSGFANRGLPFVSVASVSGFANIGTNLAGFFQGTTS"
```

CDS

```
2025301..2026398
/gene="PPE25"
/locus_tag="Rv1787"
/note="Rv1787, (MTV049.09), len: 365 aa. PPE25, Member of the Mycobacterium tuberculosis PPE family of glycine-rich proteins, similar to Z74024|MTCY274.24 Mycobacterium tuberculosis cosmid (404 aa), FASTA scores: opt: 837, E(): 0, (52.0% identity in 406 aa overlap)."
```

```
/codon_start=1
/transl_table=11
/product="PPE family protein PPE25"
/protein_id="YP_177833.1"
/db_xref="GI:57116909 GeneID:885827"
/translation="MDFGALPPEINSGRMVYCGPGSGPMLAAAAAWDGVAVELGLAATGYASVIAELTGAPWVGAASLSMVAATP
YVWLSQAAAAAEQAGMQAAAAAAAYEAAFMVTPPPVITANRVLVMTLIATNFFGQNSAAIAVAEAQYAE MWAQDAVAMYGYAA
ASASASRLIPFAAPPKTTNSAGVVAQVAAVAAMPGLLQRLSSAASVSWSNPNDDWLVRLGSLTPTERTTIVRLLGQSYFATGMA
QFFASIAQQLTFGPGGTTAGSGGAWYPTPQFAGLGASRAVSASLARANKIGALSVPPSWVKTTALTESPVAHAVSANPTVGS SHG
PHGLLRGLPLGSRITRRSGAFAHRYGFRHSVVARPPSAG"
```

CDS

```
2026790..2027971
/gene="PPE26"
/locus_tag="Rv1789"
/experiment="EXISTENCE: identified in proteomics study"
/note="Rv1789, (MTV049.11), len: 393 aa. PPE26, Member of the Mycobacterium tuberculosis PPE family of glycine-rich proteins, highly similar to others e.g. Z98268|MTCI125.26 Mycobacterium tuberculosis cosmid (385 aa), FASTA score: opt: 1283, E(): 0, (62.7% identity in 408 aa overlap)."
```

```
/codon_start=1
/transl_table=11
/product="PPE family protein PPE26"
/protein_id="YP_177835.1"
/db_xref="GI:57116911 GeneID:885333"
/translation="MDFGALPPEVNSVRMYAGPGSAPMVAAAASAWNGLAAELSSAATGYETVITQLSSEGLWGPASAAMAEAVAP
YVWMSAAAAQAEQAATQARAAAAAFEAAFAATVPPPLIAANRASLMQLISTNVFGQNTSAIAAAEAQYEMWAQDSAAMYAYAG
SSASASAVTFFSTPPQIANPTAQGTQAAAVATAAGTAQSTLTEMITGLPNALQSLTSPLLQSSNGPLSWLWQILFGTPNFPPTSIS
ALLTDLQPYASFFYNTEGLPYFSIGMGNNFIQSAKTLGLIGSAPAAVAAGDAAKGLPGLGGMLGGGPVAAGLGNAA SVGKLSV
PPVWSGPLPGSVTPGAAPLPVSTVSAAPEAAPGSLGGLPLAGAGGAGAPRYGFRPTVMARPPFAG"
```

CDS

```
2028425..2029477
/gene="PPE27"
/locus_tag="Rv1790"
/experiment="EXISTENCE: identified in proteomics study"
/note="Rv1790, (MTV049.12), len: 350 aa. PPE27, Member of the Mycobacterium tuberculosis PPE family of glycine-rich protein, similar to Z74024|MTCY274.24 Mycobacterium tuberculosis cosmid (404 aa), FASTA scores: opt: 849, E(): 0, (50.0% identity in 406 aa overlap)."
```

```
/codon_start=1
/transl_table=11
```

```

/product="PPE family protein PPE27"
/protein_id="YP_177836.1"
/db_xref="GI:57116912 GeneID:885859"
/translation="MDFGALPPEINSGRMYPGSGPMLAAAAAWDGVAVELGLAATGYASVIAELTGAPWVGAASLSMVAATP
YVWLSQAAAAAEQAGMQAAAAAAAYEAAAFVMTVPPPVITANRVLVMTLIATNFFGQNSAAIAVAEAQYAEQDAVAMYGYAA
ASASASRLIPFAAPPKTTNSAGVVAQAVASVSWPNPNDDWLVRLGSLTPTERTTIVRLLGQSYLATGMARFLTSIAQQLTFGPG
GTTAGSGGAWYPTPQFAGLGAGPAVSASLARAEPVGRSLVPPSWAVAAPAFAEKPEAGTPMSVIGEASSCGQGLLRGIPLARAG
RRTGAFHRYGFRHSVITRSPSAG"
CDS
2039453..2041420
/gene="PPE28"
/locus_tag="Rv1800"
/note="Rv1800, (MTV049.22), len: 655 aa. PPE28, Member of the Mycobacterium
tuberculosis PPE family of glycine-rich proteins, C-terminal very similar to parts of
PE proteins e.g. Z92770|MTCI5.25|Rv0151c (588 aa), FASTA scores: opt: 1269, E(): 0,
(41.5% identity in 591 aa overlap). Predicted to be an outer membrane protein (See
Song et al., 2008)."
```

```

/codon_start=1
/transl_table=11
/product="PPE family protein PPE28"
/protein_id="YP_177839.1"
/db_xref="GI:57116915 GeneID:885465"
/translation="MLPNFAVLPPEVNSARVVFAGAGSAPMLAAAAWDDLASELHCAAMSFSGSVTSGLVVWQGSASAAAMVDAA
ASYIGWLSTSAHAEGAAGLARAASVFEELAATVHPAMVAANRAQVAVSLVSNLFGQNAPIAALESLEYECMWAQDAAAMAGY
YVGASAVATQLASWLQRLQSIPGAASLDARLPSSAEAPMGVVRAVNSAIAANAAAQTVGLVMGGSGTPIPSARYVELANALYMS
GSVPGVIAQALFTPQGLYPVVVIKNLTFDSSVAQGAVILESAIRQQIAAGNNVTVFGYSQSATISSLVMANLAASADPPSPDELS
FTLIGNPNPNNGGVATRFPGISFPSLGVATGATPHNLYPTKIYTIIEYDGVADFPRYPVPLNFVSTLNAIAGTYVHSNYFILTPEQ
IDAAVPLTNTVGPMTQYIIRTENLPLLEPLRSVPVGNPLANLVQPNLKVIVNLGYGDPAYGYSTSPPNVATPFGLFPEVSPV
VIADALVAGTQQGIGDFAYDVSHLELPLPADGSTMPSTAPGSGTPVPPLSIDSLIDDLQVANRNLANTISKVAATSATVLPAD
IANAALTIVPSYNIHLFLEGIQQALKGDPMGLVNAVGYPLAADVALFTAAGGLQLLIIISAGRTIANDISAIVP"
CDS
2042001..2043272
/gene="PPE29"
/locus_tag="Rv1801"
/note="Rv1801, (MTV049.23), len: 423 aa. PPE29, Member of the Mycobacterium
tuberculosis PPE family of glycine-rich proteins, most similar to
AL022021|MTV049.29|Rv1808 (409 aa), FASTA scores: opt: 1229, E(): 0, (55.2% identity
in 422 aa overlap)."
```

```

/codon_start=1
/transl_table=11
/product="PPE family protein PPE29"
/protein_id="YP_177840.1"
/db_xref="GI:57116916 GeneID:885491"
/translation="MDFGLLPPEINSGRMYTGPGGPMMLAAATAWDGLAVELHATAAGYASELSALTGAWSGSPSSTSMASAAAPY
VAVMSATAVHAELAGAQRARIAAYEAAFAATVPPPVIAANRAQLMVLIAATNIFGQNTPAIMMTEAQYMEMWAQDAAAMYGYAGS
SATASRMTAFTEPPQTTHGQLGAQSSAVAQTAATAAGNQLSAFPQLLSAVPRALQGLALPTASQSASATPQWVTDLGNLSTFL
GGAVTGPYTFPGVLPSPGVPYLLGIQSVLVTQNGQVSAALLGKIGGKIPITGALAPLAEFALHTPILGSEGLGGGSVSAGIGRAGL
VGKLSVPQGWTVAAPEIPSPAAALQATRLAAAPIAATDGAGALLGGMALSGLAGRAAAGSTGHPIGSAAAPAVGAAAAAVEDLAT
EANIFVIPAMDD"
CDS
2043384..2044775
/gene="PPE30"
/locus_tag="Rv1802"
/experiment="EXISTENCE: identified in proteomics study"
/note="Rv1802, (MTV049.24), len: 463 aa. PPE30, Member of the Mycobacterium
tuberculosis PPE family of glycine-rich proteins, most similar to
AL022021|MTV049.30|Rv1809 (468 aa), FASTA scores: opt: 1238, E(): 0, (51.0% identity
in 471 aa overlap)."
```

```

/codon_start=1
/transl_table=11
/product="PPE family protein PPE30"
/protein_id="YP_177841.1"
/db_xref="GI:57116917 GeneID:885542"
/translation="MDFGVLPPEINSGRMYAGPGSGPMLAAAAAWDGLATELQSTAADYGSVISVLTGVWSGQSSGTMAAAAAPY
VAVMSATAALAREAAAQASAAAAAYEAAFAATVPPPVVAAANRAELAVLAATNIFGQNTGAIAAAEEARYAENWAQDAAAMYGYAGS
SSVATQVTPFAAPPPTTNAAGLATQGVAVAQAVGASAGNARSLVSEVLEFLATAGTNYNKTVAASLMNAVTVGPYASSVYNSMLGL
GFAESKMVLPANDTVISTIFGMVQFQKFFNPVTPFNPDLIPKLSALGAGLGLRSAISSGLGSTAPAIASAGASQAGSVGGMSVPPSW
AAATPAIRTVAAVFSSTGLQAVPAAAISEGSLLSQMALASVAGGALGGAAARATGGFLGGGRVTVAVKSKLSDSDSPDKLRVVAH
MMEKPESVQHWHTDEDGLDDLLAELKKKPGIHAVHVMAGGNKAEIAPTISESG"
CDS
2048398..2049597
/gene="PPE31"
/locus_tag="Rv1807"

```

CDS

```

/experiment="EXISTENCE: identified in proteomics study"
/note="Rv1807, (MTV049.29), len: 399 aa. PPE31, Member of the Mycobacterium tuberculosis PPE family of glycine-rich proteins, most similar to Rv1789|MTV049.11|AL022021 (393 aa), FASTA scores: opt: 1169, E(): 0, (49.5% identity in 412 aa overlap)."
```

CDS

```

/codon_start=1
/transl_table=11
/product="PPE family protein PPE31"
/protein_id="YP_177653.1"
/db_xref="GI:57116920 GeneID:885072"
/translation="LDFATLPPEINSARMYSGAGSAPMLAAASAWHGLSAELRASALSYSSVLSSTLTGEEWHGPASASMTAAAP
YVAVMSVTAVRAEQAGAQAEEAAAAAYEAAFAATVPPVIEANRAQLMALIATNVLGQNAPAIATEAQYAEMWSQDAMAMYGYAG
ASAAATQLTPFTEPVQTTNAGSLAAQSAIAHATGASAGAQQTTLSQLIAAIPSVLQGLSSSTAAATFASGPSGLLGIVGSGSSWL
DKLWALLDPNSNFWNTIASSGLFLPSNTIAPFLGLLGGVAAAADAAGDVLGEATSGGLGGALVAPLGSAGGLGGTVAAGLGNAAATV
GTLSVPPSWTAAAPLASPLGSALGGTPMVAPPVAAGMPGMPFGTMMGGQGFGRAVPQYGFPRPNFVARPPAAG"
2049921..2051150
/gene="PPE32"
/locus_tag="Rv1808"
/experiment="EXISTENCE: identified in proteomics study"
/inference="protein motif:PROSITE:PS00343"
/note="Rv1808, (MTV049.30), len: 409 aa. PPE32, Member of the Mycobacterium tuberculosis PPE family of glycine-rich proteins, most similar to Rv1800|MTV049.22|AL022021 (655 aa), FASTA scores: opt: 1225, E(): 0, (55.1% identity in 423 aa overlap). Contains PS00343 Gram-positive cocci surface proteins 'anchoring' hexapeptide. Nucleotide position 2050913 in the genome sequence has been corrected,A:G resulting in E331E."
```

CDS

```

/codon_start=1
/transl_table=11
/product="PPE family protein PPE32"
/protein_id="YP_177844.1"
/db_xref="GI:57116921 GeneID:885590"
/translation="MDFGALPPEINSGRMYPGSGPPLAAAAAWDALAAELYSAASYSYGSTIEGLTVAPWMPSSITMAAAVAVP
YVAVISVTAGQAEQAGAQAQAKIAAGVYETAFAATVPPVIEANRALLMSLVATNIFGQNTPAIAATEAHYAEMWAQDAAAMYGYAG
SSATASQLAPFSEPPQTTNPSATAAQSAVVAQAAGAAASDDITAQLSQLISLPLSTLQSLATTATATSASAGWDTVLQSIITILA
NLTGPYSIIGLGAIPGGWLTFTGQILGLAQNAPGVAALLGPKAAAGALSPLAPLRGGYIGDITPLGGGATGGIARAIYVGSLSVP
QGWAEAAPVMRAVASVLPGTGAAPALAAEAPGALFGEMALSSLAGRALAGTAVRSAGAAARVAGGSVTEDEVASTTTIIVIPAD"
2051282..2052688
/gene="PPE33"
/locus_tag="Rv1809"
/experiment="EXISTENCE: identified in proteomics study"
/note="Rv1809, (MTV049.31), len: 468 aa. PPE33, Member of the Mycobacterium tuberculosis PPE family of glycine-rich proteins, most similar to Rv1802|AL022021|MTV049.23 (463 aa), FASTA scores: opt: 1238, E(): 0, (51.2% identity in 471 aa overlap). Alternative nucleotide at position 2051746 (T->C; A155A) has been observed."
```

CDS

```

/codon_start=1
/transl_table=11
/product="PPE family protein PPE33"
/protein_id="YP_177845.1"
/db_xref="GI:57116922 GeneID:885555"
/translation="MDFGLQPPEITSGEMYLGPGAGPMLAAAVAWDGLAAELQSMASYSIVEGMASESWLGPSSAGMAAAAAP
YVTWMSGTSAQAKAAADQARAADVAYETAFAAVVPPQIAANRSQLISLVATNIFGQNTAAIAATEAEYEMWAQDTMAMFGYAS
SSATASRLTPFTAPPQTTNPSGLAGQAAATGQATALASGTNAVTTALSSAAAQFPFDIIPDLLQGLATLSTQYTLQMGQLINAI
GPTGATTYQNVFVTAANVTKFSTWANDAMSAPNLGTMTEFKVFWQPPPAPEIPKSSLGAGLGLRSGLSAGLAHAASAGLQANLVG
DLSVPPSWASATPAVRLVANTLTPATSLAAAPATQIPANLLGQMALGSMGTGGALGAAAPAIYTGSGARARANGGTPSAEPVKLEAV
IAQLQKQPDVAVRHWNVDKADLDLGLDLRLSKQPGIHAVHVSNGDKPKVALPDTQLGSH"
complement(2162932..2167311)
/gene="PPE34"
/locus_tag="Rv1917c"
/experiment="EXISTENCE: identified in proteomics study"
/inference="protein motif:PROSITE:PS00879"
/note="Rv1917c, (MTV050.01c-MTCY180.01), len: 1459 aa. PPE34, Member of the Mycobacterium tuberculosis PPE family of glycine-rich proteins, MPTR subfamily (see citation below). Similar to MTCY28.16, MTCY13E10.17, MTCY63.10,MTV004.05, MTCY98.24, MTCY6G11.05, etc. C-terminus is identical to Q50471. Unknown Mycobacterium tuberculosis protein (693 aa), FASTA results: opt: 2635, E(): 0, (99.7% identity in 391 aa overlap). Start changed since original submission (+23 aa). Thought to be surface exposed,cell-wall associated."
```

```

/transl_table=11
/product="PPE family protein PPE34"
/protein_id="YP_177655.1"
/db_xref="GI:57116928 GeneID:885362"
/translation="MNFSTLPEINSALIFGGAGSEPMASAAVAWDQLAMELASAAASFNSVTSGLVGESWLGPSSAAMAAVAP
YLGLWAAAAQAQRSATQAAALVAEFAVRAAMVQPALVAANRSDLVSLVFSNFFGQNAPAIAAIEAAYEQMWAIDVSVMSAYHA
GASAVASALTPFTAPPQNLTDLPAQLAAAPAAVVTAATITSSKGVLANLSLGLANSFGQMGAANLILNLGSLNPGNNFGLGNV
GSNNVGLGNTGNGNIGFGNTGNGNIGFGLTGDNQQFGGWNSGTGNIGLNFNSGTGNIGINTGTGNFGIGNSGTSYNTGIGNTGQ
ANTGFFNAGIANTGIGNTGNYNTGSFNLGSFNTGDFNTGSSNTGFFNPGNLNTGVNTGNVNTGGFNSGNYSGFFFWRGDYQGLI
GFSGTLTIPAAGLDLNLGSLVGPITIPISITIPETIPLGINSAGALVGPINVPITVPAIGLGINSTGALVGPINIPITLNSIGLE
LSAFQVINVGSISIPASPLAIGLFGVNPTVGSIGPGSISIQLTPEIPAIPPPFFGFPDYVTVSGQIGPITFLSGGYSLPAIPL
GIDVGGGLGPFVTFPDGYSPLPAIPLGIDVGGGLGPFVTFPDGYSPLPAIPLGIDVGGGLGPFVTFPDGYSPLPAIPLGIDVGAIGP
LTPPITIPISIPGLIDVSGSLGPIINIPETIAGTPGFGNSTTTPSSGFFNSGTGTSFGFNGVSGSGSFWNIAGNLGNSGFLNVGP
LTSIILNFGNTVSGLYNTSTLGLATSAFHSGVNTDSQLAGFMRNAAGGTLFNFVGFANDGTLNLGNANLGDYVNVGSGNVGSYNFG
SGNIGNSFGFGNIGSNNFVGFNVGSSNNGFANTGPGLEALHNIGFGNIGNNYGFANIGNGNIGFGNTGTGNIGIGLTGDNQV
GFGALNSGSGNIGFFNSGNGNIGFFNSGNGNVGIGNSGNYNTGLGNVGNANTGLFNTGNVNTGIGNAGSYNTGSYNAGDTNTGDL
NPGNANTGYLNLGDLNTGWGNIGDLNTGALISGSYSNGILWRGDYQGLIGYSDTSLIPAIPLSVEVNGGIGPIVVPDITIPGIPL
SLNALGGVGPVIVPDITIPGIPLSLNALGGVGPVIVPDITIPGIPLSLNALGGVGPVIVPDITIPGIPLSLNALGGVGPVIVPDI
TIPGIPLSLNALGGVGPITVPGVPISTRIPLTINIRIPVNTLNELPNVAGIFTGYIGPIPLSTFVLGVTLAGGTLESIGQFSV
NPFGLNIPLSGATNAVITIPGFAINPFGLNVPLSGTSPVTIPGFAINPFGLNVPLSGTSPVTIPGFTIPGSPLNLTANGGLGPI
NIPINITSAPGFGNSTTTPSSGFFNSGDSASGFGNVGPGISGLWNQVFNALQGGVSGIYNVQGLASGVANLGNVTVSGFNNTSTV
GHLTAAAFNSGVNNGQMLLGGFFSPGAGP"
CDS complement(2167649..2170612)
/gene="PPE35"
/locus_tag="Rv1918c"
/experiment="EXISTENCE: identified in proteomics study"
/note="Rv1918c, (MTV050.02c), len: 987 aa. PPE35, Member of the Mycobacterium
tuberculosis PPE family of glycine-rich proteins. Similar to MTCY28.16|Z95890
Mycobacterium tuberculosis cosmid (1053 aa), FASTA scores: opt: 3404,E(): 0, (65.6%
identity in 1058 aa overlap). Also similar to MTV004.05, MTY13E10.17, MTV014.03,
MTCY3C7.23,MTCY6G11.05, MTCY48.17, MTV004.03, MTCY31.07, MTCY4C12.36,MTCY180.01, etc."
/codon_start=1
/transl_table=11
/product="PPE family protein PPE35"
/protein_id="YP_177850.1"
/db_xref="GI:57116929 GeneID:885506"
/translation="MHYSVLPEINSALIFAGAGSGPMLAAASAWDGLATELASAAVSFGSVTAGLVGGSWQGRSSVAMAAAAAP
YAGWLAATAAQAEQAATQAQVMVAEFAVRLAMVQPALVAANRSLISLVISNLFQGNAPAIAAAEEAAYEEMWALDVSAMAAYS
GASAVAVALPAFALPLRLPAGLAAGPAAVVTAALTAVGMPTFAGRAIAASLGLANVGGNGLGNANGLGNIGNANLGNLGNLGSN
FGSFNIGSANLGGNNIGIGNAGANNFGLANLGNLNTGFANAGIGNFGIANTGNNNIGNLGTGNNGQIGIGLNSGNGNVGLFNAGS
ANIGFFNSGNGNFGIGNSGNFSTGLFNPGHGNTGFLNAGSFNTGMFDVGNANTGSFNVGHYNGFANPNPSPNTGTFTNTGGANTGW
FNTGSINTGAFNIGDMNGLFNTGDMNNGVYFIRGVGQGSQFAITSPDLTLPSLEIPGISVPAFSLPAITLPSLTIPAVTTPANV
TVGAFDLPLGLTVPSLTIPAAAMPANITVGAFLDLPLGLTVPSLTIPATTPPANITVGAFLNPLQLSIPSVTVPPITIPAGTALGAFNL
PTLSIPSVTVPPITIPAGTTVGGFTLPTIHTPLISTPQISIGGFSTPGIATQANSVINLPTFSLNGITITNLVVFIPNNITALQ
TNMPGVFPQIGGFANTPPAFINTGTITVGGGQINGVGFSGAINVTPFTLNVVIVPWSLGGISVDGFTLPEISTQEFPTPALTI
SPIGVGALSPLDITTTQFTTPELTIDPITLGGFTLPLQLSIPAITTPAFTIDPIALGGFTLPLQIMTPEITTPFAIDPIGLSGFTL
PQVNIPEITTPFTIIPVGLAAFTTPALTIASIHLPSTTMGGFAIPAGPGYFNSSATPSLGFNAGIGGNSGFGNSGSGLSGWFN
TSPVGLLAGSGYQNYGGLISGFSNLGSGISGFANTGTLPFAVTSLSVGLANIGNNLSGLFFQSTTP"
CDS 2367711..2368442
/gene="PPE36"
/locus_tag="Rv2108"
/note="Rv2108, (MTCY261.04), len: 243 aa. PPE36, Member of the Mycobacterium
tuberculosis PE family: N-terminus is similar to N-terminal region of Mycobacterium
tuberculosis PPE family proteins. A core mycobacterial gene; conserved in
mycobacterial strains (See Marmiesse et al., 2004)."
/codon_start=1
/transl_table=11
/product="PPE family protein PPE36"
/protein_id="YP_177859.1"
/db_xref="GI:57116946 GeneID:887814"
/translation="MPNFWALPEINSTRIYLGPGSGPILAAAQGWNALASELEKTKVGLQSALDTLLESYRGQSSQALIQQTLP
YVQWLTFTAHAHAKTAIQLTAAANAYEQARAAMVPPAMVRANRVQTTVLKAINWFGQFSTRIADKEADYEQMWFDALVMENYWE
AVQEAIQSTSHFEDPPEMADDYDEAWMLNTVFDYHNENAKEEVIHLPVDPVNERGPIELVTKVDKEGTIRLVYDGEPTFSYKEHP
KF"
CDS 2381071..2382492
/gene="PPE37"
/locus_tag="Rv2123"
/gene_synonym="irg2"
/note="Rv2123, (MTCY261.19), len: 473 aa. PPE37 (alternate gene name: irg2), member

```

of the Mycobacterium tuberculosis PPE family of proteins but the C-terminus is not repetitive (see citation below)."

```
/codon_start=1
/transl_table=11
/product="PPE family protein PPE37"
/protein_id="YP_177861.1"
/db_xref="GI:57116948 GeneID:888710"
/translation="MTFPMWFVAVPEVPSAWLSTGMGPGPLLAARAWHALAAQYTEIATELASVLAAVQASSWQGPSADRFVVA
HQPFRYWLTHAATVATAAAAAHETAAGYTSALGGMPTLAELAANHAMHGALVTTNFFGVNTIPIALNEADYLRMWIQAATVMSH
YQAVAHESVAATPSTPPAPQIVTSAASSAASSSPDPTKLILQLLKDFLELLRYLAVELLPGPLGLDLIAQVLDWFISFVSGPVFT
FLAYLVLDPDIYFGPFAPLTSVPLLPAGLTGLAGLGAVSGPAGPMVERVHSDGPSRQSWPAATGVTLVGTNPAALVTTTAPAPPTT
SAAPTAPSTPGSSAAQGLYAVGGPDGEGFNPIAKTTALAGVTTDAAAPAAKLPDQQAQSSASKATRLRRRLRQHRFEFLADDGRL
TMPNTPEMADVAAGNRGLDALGFAGTIPKSAPGSATGLTHLGGGFADVLSQPMLPHTWDGSD"
```

CDS

```
complement(2632923..2634098)
/gene="PPE38"
/locus_tag="Rv2352c"
/experiment="EXISTENCE: identified in proteomics study"
/note="Rv2352c, (MTCY98.21c), len: 391 aa. PPE38, Member of Mycobacterium tuberculosis PPE_family, highly similar to many e.g. Q10778|MTCY48.17|Y04H_MYCTU (734 aa), FASTA scores: opt: 713, E(): 2.8e-27, (37.7% identity in 430 aa overlap); Q10540|MTCY31.06c, Q11031|MTCY02B10.25c, Q10813|MTCY274.23c, P42611|MTV037.06c, P71868|MTCY03C7.23, P95248|MTCY98.22c, P71869|MTCY03C7.24c, etc."
```

```
/codon_start=1
/transl_table=11
/product="PPE family protein PPE38"
/protein_id="YP_177870.1"
/db_xref="GI:57116974 GeneID:888959"
/translation="MILDFSWLPPEINSARIYAGAGSGPLFMAAAAWEWGLAADLRASASSFDAVIAGLAAGPWSGPASVAMAGAA
APYVGWLSAAAGQAELSAGQATAAATAFEAALAATVHPPAAVTANRVLLGALVATNLLGQNTPAIAATEFDYVEMWAQDVGAMVGY
HAGAAVAETLTPFSVPPDLLAGLASQAGAQLTGMATSVSAALSPIAEGAVEGVPAVVAAAQSVAAAGLPVDAALQVQAAAYPAS
MLIGPMMQLAQMGTTANTAGLAGAEAAAGLAAADVPTFAGDIASGTGLGGAGGLGAGMSAELGKARLVGAMSVPTWEGSVPARMA
SSAMAGLGAMPAEVPAAGGPMGMPMPMGMGAGAGMPAGMMGRGGANPHVVQARPSVVPVVGIG"
```

CDS

```
complement(2634528..2635592)
/gene="PPE39"
/locus_tag="Rv2353c"
/note="Rv2353c, (MTCY98.22c), len: 354 aa. PPE39, Member of Mycobacterium tuberculosis PPE_family, highly similar to many e.g. near ORF P95249|Rv2356c|MTCY98.25 from Mycobacterium tuberculosis (615 aa), FASTA scores: opt: 1566, E(): 3.2e-69, (66.1% identity in 349 aa overlap); Q10778|MTCY48.17, Q10540|MTCY31.06c, E241779|MTCY98, Q10813|MTCY274.23c, P71868|MTCY03C7.23, P71869|MTCY03C7.24c, P42611|MTV037.06c, E64997|MTCY98, Q10707|MTCY49.38c, P71657|MTCY02B10.25c, etc. Note that the ATG and RBS appear to be provided by the IR of neighbouring IS6110. Predicted to be an outer membrane protein (See Song et al., 2008)."
```

```
/codon_start=1
/transl_table=11
/product="PPE family protein PPE39"
/protein_id="YP_177871.1"
/db_xref="GI:57116975 GeneID:886003"
/translation="MPGRFRNFGSQNLGSGNIGSTNVGSGNIGSTNVGSGNIGDTNFGNGNNGNFNFGSGNTGSNNIGFGNTGSG
NFGFGNTGMNINIGIGLTGDGQIGIGGLNSGSGNIGFGNSGTGNVGLFNSTGNVGFNGSGTANTGFGNAGNVNTGFVWNGGSTNTG
LANAGAGNTGFFDAGNYNFGSLNAGNINSSFGNSGDGNSGFLNAGDVNSGVGNAGDVNTGLGNSGNINTGGFNPGLTNTGFFSAM
TQAGPNSGFFNAGTGNISGFHNDPAGSGNSGIQNSGFGNSGYVNTSTTSMFGGNSGVLNTGYGNSGFYNAAVNNTGIFVTGMVSS
GFFNFGTGNSGLLVSGNLSGFFKNLFG"
```

CDS

```
complement(2637688..2639535)
/gene="PPE40"
/locus_tag="Rv2356c"
/experiment="EXISTENCE: identified in proteomics study"
/note="Rv2356c, (MTCY98.25), len: 615 aa. PPE40, Member of Mycobacterium tuberculosis PPE_family, highly similar to others e.g. Q10778|MTCY48.17|YF48_MYCTU hypothetical PPE-family protein (678 aa), FASTA scores: opt: 1888, E(): 1.9e-78, (54.4% identity in 667 aa overlap); Q10540|MTCY31.06c, E241779|MTCY98, P42611|MTV037.06c, Q10813|MTCY274.23c, P71657|MTCY02B10.25c, MTCY03C7.23, P71869|MTCY03C7.24c, etc. Predicted to be an outer membrane protein (See Song et al., 2008)."
```

```
/codon_start=1
/transl_table=11
/product="PPE family protein PPE40"
/protein_id="YP_177872.1"
```

CDS

```

/db_xref="GI:57116976 GeneID:888950"
/translation="MVNFSVLPPEINSGRMFFGAGSGPMLAAAAAWDGLAAELGLAAESFGLVTSGLAGGSGQAWQAAAAAMVV
AAAPYAGWLAAAAARAGGAAVQAKAVAGAFEAAARAAMVDPVVVAANRSFAFVQLVLSNVFGQNAPIAAAAEATYEQMWAADVAAMV
GYHGGASAAAAALAPWQQAVPGLSGLLGGAAANAPAAAAAQGAAQGLAELTLNLGVGNIGSLNLGSGNIGGTVNGSGNVGGTNLGS
NYGSLNWGSGNTGTGNAGSGNTGDYNPNGSGNFGSGNFGSGNIGSLNVGSGNFGTTLNLANGNNGDVNFGGGNTGDFNFGGGNNGTL
NFGFGNTGSGNFGFGNTGNNNIGIGLTDGQIGIGLNLGSGTGNIGFNGSGNNGNIGFFNSGDGNIGFFNSGDGNTGFGNAGNINTG
FWNAGNLNTGFGSAGNGNVGIFDGGNSNSGSFNVGFQNTGFGNSGAGNTGFFNAGDSNTGFANAGNVNTGFFNNGDINTGGFNNG
NVNTGFGSALTQAGANSFGNLGTGNSGWGNSDPSGTGNSGFFNTGNGNSGFSNAGPAMLPGFNSGFANIGSFNAGIANSNNLA
GISNSGDDSSGAVNSGNSQNSGAFNAGVGLSGFFR"
complement(2727336..2727920)
/gene="PPE41"
/locus_tag="Rv2430c"
/experiment="EXISTENCE: identified in proteomics study"
/note="Rv2430c, (MTCY428.16), len: 194 aa. PPE41, Member of the Mycobacterium
tuberculosis PPE family similar to others e.g. AAK46014|Rv1745|MT1745 from
Mycobacterium tuberculosis (385 aa) FASTA scores: opt: 389, E(): 1.2e-17, (35.95%
identity in 192 aa overlap); etc."
/codon_start=1
/transl_table=11
/product="PPE family protein PPE41"
/protein_id="YP_177881.1"

```

CDS

```

/db_xref="GI:57116988 GeneID:885945"
/translation="MHFEAYPPEVNSANIYAGPGPDSMLAAARAWRSLDVENTAVQRSFNRTLLSLMDAWAGPVVMQLMEAAKPF
VRWLTDLQVQLSEVERQIHEIVRAYEWAHDMVPLAQIYNRAERQILIDNNALGQFTAQIADLDQEYDDFWEDEDGEVMRDYRLR
VSDALSKLTPWKAPPPIAHSTVLVAPVSPSTASSRDT"
2935046..2936788
/gene="PPE42"
/locus_tag="Rv2608"
/note="Rv2608, (MTCY01A10.25c), len: 580 aa. PPE42, Member of the Mycobacterium
tuberculosis PPE family, highly similar to many e.g. O06828|Rv1430|MTCY493.24c from
Mycobacterium tuberculosis (528 aa), FASTA scores: opt: 1004, E(): 5.9e-48, (56.05%
identity in 307 aa overlap)."
/codon_start=1
/transl_table=11
/product="PPE family protein PPE42"
/protein_id="YP_177893.1"

```

CDS

```

/db_xref="GI:57117005 GeneID:888204"
/translation="MNFAVLPEVNSARIFAGAGLGPMLAAASAWDGLAEELHAAAGSFASVTTGLAGDAWHGPASLAMTRAASP
YVWGLNNTAAGQAAQAGQARLAASAFEATLAATVSPAMVAANRTRLASLVAANLLGQNAPIAAAAEAYEQIWAQDVAAMFGYHS
AASAVATQAPIQEGLQQQLQNVLAQLASGNLGSNGVGVGNIGNDNIGNANIGFNGRGDANIGIGNIGDRNLGIGNTGWNIGIG
ITGNGQIGFGKAPANPDVLVVGNGGPGVTALVMGGTDSLPLPNIPLLEYAARFITPVHPGYTATFLETSPQFFPFTGLNSLTVD
SVAQGVTLNHTAIMAQLAAGNEVVVFGTSQSATIATFEMRYLQSLPAHLRPLGDELSTLTGNPNRPDGGILTRFGFSIPQLGFT
LSGATPADAYPTVDYAFQYDGVNDFPKYPLNVFATANA IAGILFLHSLIALPPDLASGVVQPVSSPDVLTYYILLPSQDLPLLV
PLRAIPLLGNPLADLIQPDRLVLEVELGYDRTAHQDVPSPFGLFPDWDVAEVAADLQQGAVQGVNDALSGLGLPPPWPQALPRLF"
complement(3076894..3078078)
/gene="PPE43"
/locus_tag="Rv2768c"
/experiment="EXISTENCE: identified in proteomics study"
/note="Rv2768c, (MTV002.33c), len: 394 aa. PPE43, Member of the Mycobacterium
tuberculosis PPE family, highly similar to many e.g. upstream ORF
O33312|Rv2770c|MTV002.35c (402 aa), FASTA scores: opt: 1135, E(): 6.1e-51, (62.15%
identity in 391 aa overlap); and P96362|Rv1039c|MTCY10G2.10 from M. tuberculosis (391
aa), FASTA scores: opt: 1721,E(): 6.8e-81, (70.35% identity in 398 aa overlap).
Equivalent to AAK47157 from Mycobacterium tuberculosis strain CDC1551 (462 aa) but
shorter 68 aa."
/codon_start=1
/transl_table=11
/product="PPE family protein PPE43"
/protein_id="YP_177906.1"

```

CDS

```

/db_xref="GI:57117022 GeneID:887765"
/translation="MDFGALPPEINSTRMYAGAGAAPLMAAGATWNGLAVELSTTASSVESVIMQLTTEQWLGPASMSMVVAAQP
YLAWLTYTAESAHAHAQAAMASAAAFEAFAFAMTVPPAEVAANRALLAALVATNVLQNTPAIMATEAHYGENWAQDALAMYGYAA
SSAAAGRLNPLITPSQTANMAGLAGQAAAVSHAAAASTVQQVGLGSLISNLPNAVMGFASPLTSAADAAGLGGIIQDIEELLGIT
FVQNAINGAVNTTAWFVMATIPNAVFLGHFAALNPATVTAADAVPAAAAAAGLAHTVTPVGVGGASLTASLGEASSVGGLSVP
AGWSTAAPAMTSGTTALEGSGWAVPEEAGPVAAMPGMAGISGAACKGAGAYAGPRYGFKPIVMPKQVVV"
complement(3079309..3080457)
/gene="PPE44"
/locus_tag="Rv2770c"
/experiment="EXISTENCE: identified in proteomics study"

```

/note="Rv2770c, (MTV002.35c), len: 382 aa. PPE44, Member of the Mycobacterium tuberculosis PPE family, highly similar to many e.g. downstream ORF O33310|Rv2768c|MTV002.33c from M. tuberculosis (394 aa), FASTA scores: opt: 1135, E(): 2.2e-53, (62.15% identity in 391 aa overlap); and P96362|Rv1039c|MTCY10G2.10 from Mycobacterium tuberculosis (391 aa), FASTA scores: opt: 1010, E(): 1e-46, (55.95% identity in 395 aa overlap). Equivalent to AAK47159 from Mycobacterium tuberculosis strain CDC1551 (402 aa) but shorter 20 aa. Start changed since first submission (-20 aa)."

/codon\_start=1  
/transl\_table=11  
/product="PPE family protein PPE44"  
/protein\_id="YP\_177677.1"  
/db\_xref="GI:57117024 GeneID:888456"  
/translation="MDFGALPPEVNSARMYGGAGAADLLAAAAAWNGIAVEVSTAASSVGSVITRLSTEHWMPASLSMAAAVQP  
YLVWLTCTAESSALAAAQAMASAAAFAFETAFALTVPPAEVNVANRALLAELTATNIIQGQVSAIAATEARYGEMWAQDASAMYGYAA  
ASAVAARLNPLTRPSHITNPAGLAHQAAAVGQAGASAFARQVGLSHLISDVADAVLSFASPVMSAADTGLEAVRQFLNLDVPLFV  
ESAFHGLGGVADFATAAIGNMTLLADAMGTVGGAAAPGGGAAA AVAHAVAPAGVGGTALADLGNASVVGRLSVPASWSTAAPATA  
AGAALDGTGWAVPEEDGPIAVMPPAPGMVVAANSVGDSPRYGVKPIVMPKHGLF"

CDS

complement(3200794..3202020)  
/gene="PPE45"  
/locus\_tag="Rv2892c"  
/experiment="EXISTENCE: identified in proteomics study"  
/note="Rv2892c, (MTCY274.23c), len: 408 aa. PPE45, Member of the Mycobacterium tuberculosis PPE family, highly similar to many e.g. O06386|Rv3621c|MTCY15C10.31|MTCY07H7B. 01 from M. tuberculosis (413 aa), FASTA scores: opt: 957, E(): 6.2e-46, (44.7% identity in 423 aa overlap)."

/codon\_start=1  
/transl\_table=11  
/product="PPE family protein PPE45"  
/protein\_id="YP\_177913.1"  
/db\_xref="GI:57117034 GeneID:887824"  
/translation="MDFGVLPPEINSGRMYPGSGPMMAAAAAWDSLAAELGLAAGGYRLAISELTGAYWAGPAAASMVAAVTP  
YVAWLSATAGQAEQAGMQARAAAAAYELAFAMTVPPVNVANRALLVALVATNFFGQNTPAIAATEAQYAEMWAQDAAAMYAYAG  
SAAIATELTPFTAAPVTTSPAALAGQAAATVSSTVPLATTAAVPQLLQQLSSTSLIPWYSALQQWLAENLLGLTPDNRMTIVRL  
LGISYFDEGLLQFEASLAQQAIPGTPGGAGDSGSSVLDWSGPTIFAGPRASPSVAGGGAVGGVQTPQPYWYWALDRESIGGSVSA  
ALGKGSAGSLSVPPDWAARARWANPAAWRLPGDDVTALRGTAEENALLRGFPMASAGQSTGGGFVHKYGFRLAVMQRPPFAG"  
complement(3376939..3378243)

CDS

/gene="PPE46"  
/locus\_tag="Rv3018c"  
/note="Rv3018c, (MTV012.32c), len: 434 aa. PPE46, Member of PPE family but lacks Gly, Ala rich repeats at C-terminal domain, closest to MTCY261.19. See citation below. Also very similar to following ORF MTV012.35c. Nearly identical in parts to Mycobacterium tuberculosis protein erroneously described as dihydrofolate reductase (X59271|MTFOLA\_1) P31500|DYR\_MYCTU (214 aa), FASTA scores: opt: 972, E(): 4.4e-42, (80.0% identity in 195 aa overlap); and Z97559|MTCY261\_19 from Mycobacterium tuberculosis cosmid (473 aa), FASTA scores: opt: 806, E(): 0; (38.8% identity in 479 aa overlap); and O53268|MTV012.35c from Mycobacterium tuberculosis (358 aa), FASTA scores: opt: 1714, E(): 3.3e-79, (78.3% identity in 355 aa overlap)."

/codon\_start=1  
/transl\_table=11  
/product="PPE family protein PPE46"  
/protein\_id="YP\_177918.1"  
/db\_xref="GI:57117045 GeneID:888940"  
/translation="MTAPVWLASPEVHSALLSAGPGPSLQAAAAGWSALSAAEYAAVAQELSVVVAAVGAGVWQGPSAELFVAA  
YVPYVAWLQASADSAAAAGEHEAAAAGYVCALAEMPTLPELANHLTHAVLVATNFFGINTIPIALNEADYVRMWQAATVMSA  
YEAVVGAALVATPHTGPAPVIVKPGANEASNAVAATITPFPWHEIVQFLEETFAAYDQYLSALLSELPAVAVWVWFQLFVDILGF  
NIIGFIITLASNAQLLTFEAINASYVAVGLLYAIAGVIDIVVEWVIGNLFGVVPVLLGGPLLALAAAVVPGVAGLAGVAGLAALP  
AVGAAAAPAAALVGSVAPVSGGVSPQARLVSAVEPAPASTSVSVLASDRGAGALGFVGTAGKESVQGPAGLTVLADEFDGDGAPV  
PMLPGSWGPDVGVAGDGLVSV"

CDS

complement(3490476..3491651)  
/gene="PPE49"  
/locus\_tag="Rv3125c"  
/experiment="EXISTENCE: identified in proteomics study"  
/note="Rv3125c, (MTCY164.35c), len: 391 aa. PPE49, Member of the Mycobacterium tuberculosis PPE family, similar to other e.g. P95247|Rv2352c|MTCY98.21c (391 aa), FASTA scores: opt: 1576, E(): 3.8e-72, (62.55% identity in 398 aa overlap), MTCY98.0029c, MTCY03A2.22c, MTCY10G2.10, MTCY02B10.25c, MTCI364.08, MTCY21C12.09c, MTCY48.17. This region is a possible MT-complex-specific genomic island (See Becq et al., 2007)."

```

/codon_start=1
/transl_table=11
/product="PPE family protein PPE49"
/protein_id="YP_177932.1"
/db_xref="GI:57117062 GeneID:888892"
/translation="MVLGFSWLPPEINSARMFAGAGSGPLFAAASAWEGLAADLWASASSFESVLAALTTGPWTGPASMSMAAAA
SPYVWGLSTVASQAQLAAIQARAAAATAFEAALAATVHPTAVTANRVSLASLIAANVLGQNTPAIAATEFDYLEMWAQDVAAMVGY
HAGAKSVAATLAPFSLPPVSLAGLAAQVGTQVAGMATTASAAVTPVVEGAMASVPTVMQSLVSLQLPLQHASMLFLPVRILTS
PITTLASMARESATRLGPPAGGLAAANTPNPSGAAIPAFKPLGGRELGAGMSAGLGQAQLVGSMSVPPTWQGSIPISMASMSG
LGVPNPVVALTQAAGAAGGMPMMLMPSISGAGAGMPGGLMDRDGAGWHVTQARLTVIPRTGVG"
CDS 3501334..3501732
/gene="PPE50"
/locus_tag="Rv3135"
/note="Rv3135, (MTCY03A2.23c), len: 132 aa. PPE50, Member of the Mycobacterium
tuberculosis Ala-, Gly-rich PPE family, similar to P95190|Rv3136|MTCY03A2.22c (380
aa),FASTA scores: opt: 494, E(): 6.7e-25, (57.25% identity in 131 aa overlap) (next
ORF downstream), MTY21C12_9,MTCY3C7_24, MTCI125_27, MTV049_12, MTV049_9,
MTV049_11,MTCY274_24 etc."
/codon_start=1
/transl_table=11
/product="PPE family protein PPE50"
/protein_id="YP_177934.1"
/db_xref="GI:57117064 GeneID:888153"
/translation="MDYAFLLPPEINSARMYSGPGNSMLVAAASWDALAAELASAAENYGSVIARLTGMHWWGPASTSMLAMSAP
YVEWLERTAAQTKQTATQARAAAAAFEQAHAMTVPPALVTGIRGAIIVETASASNTAGTPP"
CDS 3501794..3502936
/gene="PPE51"
/locus_tag="Rv3136"
/experiment="EXISTENCE: identified in proteomics study"
/note="Rv3136, (MTCY03A2.22c), len: 380 aa. PPE51, Member of the Mycobacterium
tuberculosis Ala-, Gly-rich PPE family, similar to Q9AGF0|Ov2770c Rv2770c-like
protein from M. microti (397 aa), FASTA scores: opt: 917, E(): 9e-41,(46.15% identity
in 388 aa overlap); O33312|Rv2770c|MTV002.35c, MTV002_36, MTCI125_26,MTCY10G2_10,
MTCI364_8, MTV049_28, MTV049_29, etc."
/codon_start=1
/transl_table=11
/product="PPE family protein PPE51"
/protein_id="YP_177935.1"
/db_xref="GI:57117065 GeneID:888835"
/translation="MDFALLPPEVNSARMYTGPGAGSLLAAAGGWDSLAAELATTAEAYGSVLSGLAALHWRGPAAESMAVTAAP
YIGWLYTTAEKTQQTAIQARAAALAFEQAYAMTLPPPVAANRIQLLALIATNFFGQNTAAIAATEAQYAEMWAQDAAAMYGYAT
ASAAAALLTPFSPPRQTTNPAGLTAQAAAVSQATDPLSLLIETVTQALQALTIPSFIPEDFTFLDAIFAGYATVGVTDVDFVFA
GTIGAESNLGLLNVGDENPAEVTGDFGIGELVSATSPGGGVSASGAGGAASVGNITVLASVGRANSIGQLSVPPSWAAPSTRPVS
ALSPAGLTTLPGLDVAEHGMPGVPVPAAGRASGVLPRYGVRLTVMHPPAAG"
CDS complement(3510088..3511317)
/gene="PPE52"
/locus_tag="Rv3144c"
/experiment="EXISTENCE: identified in proteomics study"
/note="Rv3144c, (MTCY03A2.14), len: 409 aa. PPE52, Member of the Mycobacterium
tuberculosis PPE family, Gly-,Ala-rich, similar to others e.g.
P71868|Rv3533c|MTCY03C7.23 (582 aa), FASTA scores: opt: 1007, E(): 5.2e-35, (56.2%
identity in 306 aa overlap); and MTV014_3, MTCY6G11_5,MTCY98.0034c, MTCY31.06c,
MTCY48.17, MTCY98.0029c,MTCY03C7.17c, etc. Nucleotide position 3510642 in the genome
sequence has been corrected, T:C resulting in S226G."
/codon_start=1
/transl_table=11
/product="PPE family protein PPE52"
/protein_id="YP_177936.2"
/db_xref="GI:448824800 GeneID:887930"
/translation="MSFVVLPEINSLRMFIGAGTAPMLAAAAAWDGLAEELGTAAQSFASVTAGLAGQAWQGAALAMAAAAAP
YAGWLTAAAAQSAGAAGQARAVASIFEEAAQAATVLPAAVAANRDAFVQLVMTNLFQGNAPLIAAEEGVYEEEMWAADVAAMSGYYS
GASIAAAQVVPWASLLQRFPLGAGATGATGGESVGTGATGGESVGTGGGATASGGGVGYVGGVVASAGLAAGDPAHG
SVGQGNFGGGDVGAGDVAASSATSAHAGVSPGFIGAPLALALAALQMGARGTNSAPGTATESARAPEPAASAPPEAVVEVPELEV
PAMGVLPVTPDKVAAKAAPLSTTRVQGSAGSGIPESTLRTAQGQQASETSAEEETAPSLRPEAAAGQLRPRVRKDKPKIQMRGG"
CDS complement(3527391..3529163)
/gene="PPE53"
/locus_tag="Rv3159c"
/experiment="EXISTENCE: identified in proteomics study"
/note="Rv3159c, (MTV014.03c), len: 590 aa. PPE53, Member of the Mycobacterium

```



tuberculosis PPE\_family of Gly-, Asn-rich proteins. Highly similar to P71868|Rv3533c|MTCY03C7.23 (582 aa), FASTA scores: opt: 2289, E(): 3.2e-98, (63.5% identity in 600 aa overlap); and also similar to MTCY48\_17,MTV041\_29, MTCY6G11\_5, MTCY98\_24, etc. Predicted to be an outer membrane protein (See Song et al., 2008)."

```
/codon_start=1
/transl_table=11
/product="PPE family protein PPE53"
/protein_id="YP_177937.1"
/db_xref="GI:57117067 GeneID:888794"
/translation="MNYSVLPPEINSLRMFTGAGSAPMLAASVAWDRLLAEALVAASSFGSVTSGLAGQSWQAAAAAMAAAAAP
YAGWLA AAAARAAGASQAQAKAVASAFEARAATVHPMLVAANRNAFVQLVLSNLFQGNAPAI AAAEAMYEQMWAAADVAAMVGYHG
GASAAAQLSSWSIGLQQALPAAPSALAAAIGLGNIGVGNLGGGNTGDYNLGSGNSGNANVGSNSGNANVGSNDGATNLGSGN
IGNTNLGSGNVGNVNLGSGNRGFGNLGNGNFGSGNLGSGNTGSTNFGGGNLSGFLGSGNIGSSNIGFGNNGDNNLGLGNNNGNN
IGFGLTGDNLVIGIGALNSGIGNLGFGNSGNNNIGFFNSGNNNVGFFNSGNNNFVFGNAGDINTGFGNAGDTNTGFGNAGFFNMGI
GNAGNEDMGVGNNGSFFNVGVGNAGNQSVGFGNAGTLNVGFANAGSINTGFANSGSINTGGFDSGDRNTGFGSSVDQSVSSSGFGN
TGMNSSGFFNTGNVSAGYGNNGDVQSGINNTNSGGFNVGFYNSGAGTVGIANSGLQTTGIANSGLTNTGVANTGDHSSGGFNGQS
DQSGFFGQP"
```

CDS

```
complement(3729364..3736935)
/gene="PPE54"
/locus_tag="Rv3343c"
/experiment="EXISTENCE: identified in proteomics study"
/note="Rv3343c, (MTV016.43c), len: 2523 aa. PPE54, Member of the Mycobacterium tuberculosis PPE family, MPTR subgroup of Gly-, Asn-rich proteins. Most similar to O50379|Rv3350c|MTV004.07c|MTV004_5 from Mycobacterium tuberculosis strain H37Rv (3716 aa), FASTA scores: opt: 4672, E(): 4e-211, (44.2% identity in 3174 aa overlap); and also similar to MTV004_3, MTCY63_9, MTY13E10_17,MTY13E10_16, MTCY180_1, MTV050_1, MTCY3C7_23, MTV014_3,MTCY63_10; etc."
```

```
/codon_start=1
/transl_table=11
/product="PPE family protein PPE54"
/protein_id="YP_177960.1"
/db_xref="GI:57117092 GeneID:888033"
/translation="MSFVVMPEINSLLIYTGAGPGPLLA AAAAWDELAAELGSA AAFSGSVTSGLVGGI WQGPSSVAMAAAAAP
YAGWLSAAAASAESAAGQARAVVGVFEAALAE TVDPFVIAANRSRLVSLALS NLFQGNTPAIAAAEFDYELMWAQDVAAMLGYHT
GASAAAALAPFGSPLASLAAAAPAKSLAVNLGLANVGLFNSAGNSGVNSYNVAGNVSYNVGGNIGNNVGLGNVWGNGFGL
GNSGLTPGLMGLGNIGFNGAGSYNFGLANMGVGNIGFANTGSGNFGI GLTGDNLTFGGFNTGSGNVGLFNSGTGNVGGFNSGTG
NWGVFNSGSYNTGIGNSGIASTGLFNAGGFNTGVVNAGSYNTG SFNAGEANTGGFNPGSVNTGWLNTGDINTGVANS GDVNTGAF
ISGNYSNGVLRGDYQGLLGFSSGANVLPV IPLSLDINGGVGAI TIEPIHILPDI PININETLYLGLPLVPPINVPAISLGVGIP
NISIGPIKINPITLWPAQNFNQ TITLAWPVSSITIPQIQQVALSPSPIPTTLIGPIHINTGFSIPVTF SYSTPALTLFPVGLSIP
TGGPLTLTLGVTAGTEAFTIPGFSIPEQPLPLAINVIGHINALSTPAITIDNIPLNLHAIGGVGPVDIVGGNVPASPGFNGSTTA
PSSGFFNTGAGGVSGFGNVGAHTSGWFNQSTQAMQVLP GTVSGYFNSGTLMSGIGNVGTQLSGMLSGGALGNNFGLGNIGFDNV
GFGNAGSSNFGLANMGIGNIGLANTGNGNIGIGLSGDNLTFGGFNSGSENVGLFNSGTGNVGGFNSGTGNLGVFNSGSHNTGFF
LTGNNINVLAPFTPGTLFTISEIPIDLQVIGGIGPIHVQPIDIPAFDIQITGGF IGIREFTLPEITIPAIP IHVTGTVGLGEGFHV
NPAFVLFQQTAMAEITADPVVLPDPFITIDHYGPPLGPPGAKFPSSGSFYLSISDLQINGPIIGSYGGPGTIPGPF GATFNLTSS
LALFPAGLTVPDQTPVTVNLTGGLDSITLFPGG LAFPENPVVSLTNFSVGTGGFTVFPQGF TVDRIPVDLHTLSIGPFPFRWDY
IPPTPANGPIPAVPGGFGLTSGLFPFHFTLNGGIGPISIP TTTVVDALNPLLTVTGNLEVPFPVDPDIPIPAINFGLDGNVNVSF
NAPATLLSGLGITGSIDISGIQITNIQTQPAQLFMSVQ TFLFLDFRDIELNPIVIPGSSIPITMAGLSIPLPTVSESIPLNF
SFGSPASTVKSMILHEILPIDVSINLEDAVFIPATVLP AIPLNVDVTIPVGPINIP IITEPGSGNSTTTTSDPFSGLAVPGLGVG
LLGLFDGSIANNLISGFNSAVGIVGPNVGLSNLGGGNVGLGNV GDFNLGAGNVGGFNVGGGNIGNNVGLGNVGFGNVGLANSGL
TPGLMGLGNIGFNGAGSYNFGLANMGVGNIGFANTGSGNFGI GLTGDNLTFGGFNTGSGNVGLFNSGTGNVGGFNSGTGNWGVF
NSGSYNTGIGNSGIASTGLFNAGGFNTGVVNAGSYNTG SFNAGQANTGGFNPGSVNTGWLNTGDINTGVANS GDVNTGAFISGNY
SNGAFWRGDYQGLLGF SYRPAVLPQT PFLDLTLTGGLFSVVI PAIDIPAIRPEFSANVAIDSFTVPSIP IPQIDLAATTVSVGLG
PITVPHLDIPRPVTLNLYLFGSQPGGPKIGPITGLFNTP IGLTPLALSQIVIGASSSQGTITAFLANLPSTPVVTIDEIPLLA
SITGHSEPVDIFPGGLTIPAMNPLSINLSGGTGA VTTIPAITIGEIPFDLVAHSTLGPVHILIDLPAVPGFGNTTGAPSSGFFNSG
AGGVSGFGNVGAMVSGGWNQAPSALLGGGSGVFNAGTLHSGV LNFVSGMSGLFNTSVLGLGAPALVSGLSVQQLSGLLASGTA
LHQGLVLFNGLADVGLGNVGLGNV GDFNLGAGNVGGFNVGGGNIGNNVGLGNV GWNFGLGNSGLTPGLMGLGNIGFNGAGSYN
FGLANMGVGNIGFANTGSGNFGI GLTGDNLTFGGFNTGSGNVGLFNSGTGNVGGFNSGTGNWGVFNSGSYNTGIGNSGIASTGL
FNAGGFNTGVVNAGSYNTG SFNAGQANTGGFNPGSVNTGWLNTGDINTGVANS GDVNTGAFISGNY SNGAFWRGDYQGLLGF SYT
STIIP EFTVANIHASGGAGPIIVPSIQFPAIPLDLSATGHIGGFTIPPVSI SPITVRI DPVFDLGPITVQDITIPALGLDPATGV
TVGPIFSSGSIIDPFSLTLLGF INVNPVPAIQ TAPSEILPFTVLLSSLVGTHLTP EITIPGFHIPVDP IHVELPLSVTIGPFVVSPE
ITIPQLPLGLALSGATPAFAFPLEITIDRIPVVLVDNALLGP INAGLVIPPVPGFGNTTAVPSSGFFNIGGGGGLSGFHNLGAGM
SGVLNAISDPLLGSASGFANFTQLSGILNRGADISGVYNTGALGLITSALVSGFGNVGQQLAGLIYTGTFP"
```

CDS

```
complement(3743711..3753184)
/gene="PPE55"
/locus_tag="Rv3347c"
/experiment="EXISTENCE: identified in proteomics study"
/note="Rv3347c, (MTV004.03c), len: 3157 aa. PPE55, Member of the Mycobacterium tuberculosis PPE family, Gly-, Ala-,Asn-rich protein. Similar to many from Mycobacterium tuberculosis strains H37Rv and CDC1551, e.g. O50379|Rv3350c|MTV004.07c
```

(3716 aa), FASTA scores: opt: 6497, E(): 0, (61.65% identity in 3756 aa overlap); and other upstream ORFs MTV004\_5, MTY13E10\_15, MTCY28\_16, MTCY63\_9, MTY13E10\_17, MTCY180\_1; etc. Predicted possible vaccine candidate (See Zvi et al., 2008)."

```
/codon_start=1
/transl_table=11
/product="PPE family protein PPE55"
/protein_id="YP_177963.1"
/db_xref="GI:57117095 GeneID:888120"
/translation="MNFVPLPEINSVLMYSGAGSSPLLAAAAAWDGLAEELGSAAVSFGQVTSGLTAGVWQGAAAAAMAAAAAP
YAGWLGSVAAQAVAVAGQARAATAAFAEALAATVDPAAVAVNRMAMRALAMSNLLGQNAIAAVEAEYELMWAADVAAMAGYHS
GASAAAAALPAFSPPAQALGGVGAFLNALFAGPAKMLRLNAGLGNVGNVNVGLGNVGI FNLGAANVGAQN LG AANAGSGNFGFG
NIGNANFGFGNSGLGLPPGMGNIGLGNAGSSNYGLANLGVGNIGFANTGSNNIGLGTGDNLTGIGGLNSGTGNLGLFNSGTGNI
GFFNSGTGNFGVFNSSGYSYNTGVGNAGTASTGLFNVGFFNTGVANVGSYNTGSFNAGTNTGGFNPGNVNTGWLNTGNTNTGIANS
GNVNTGAFISGNFNSGVLWRGDYEWGLSGGSTIPAIPIGLELNGGVPIITVLP IQILPTIPLNIHQTFSLGPLVVPDIVIPAF
GGGTAIPISVGPITISPIITLFPAQNFNTTFVPGFFGLGVVNIISGIEIKDLAGNVTLQLGNLNDTRINQSFVTVNWSTPAVTI
FPNGISIPNNPLALLASASIGTLGFTIPGFTIPAAPLPLTIDIDGQIDGFSTPPITIDRIPLNLGASVTVGPILINGVNIIPATPG
FGNTTAPSSGFFNSGDGGVSGFGNFGAGSSGWWNQATEVAGAGSGFANFGSLGSGVNLNFGSGVSGLYNTGGLPPGTPAVVSGI
GNVGEQLSGLSSAGTALNQSLIINLGLADVGSVNVGFGNVGDFNLGAANIGDLNVGLGNVGGGNVGFNGNIGDANFGLGNAGLAAG
LAGVNIIGLGNAGSGNVGFGNMVGNIGFNGTGTNNLIGLGTGDNQTIIGGLNSGAGNIGLFNAGTGNVGLFNSGTGNFGNFGNSG
SFNTGIGNGGTGSTGLFNAGNFNTGVANPGSYNTGSFNVDGNTGGFNPGSINTGWFNTGNANTGVANSNVDTGALMSGFNFSNG
ILWRGNFEGFLGNLVGITIPEFPIHWTSTGGIGPIIIPDITLIPPIHLGLTQANYGFVDPDIPPIAIIHDFDGAADAGFTAPAT
TLLSALGITGQFRFGPITVSNVQLNPFVNLKQLFLHDAFPNEFPDPTISVQIQVAIPLTSATLGGALPLQQTIDAIELPAISF
SQSIPIDIPPIDIPASTINGISMSEVVPIDVSVDIPAVTITGTRIDPIPLNFDVLSAGPINISIIDIPALPGFGNSTELPSSGF
FNTGGGGSGIANFAGVSGLLNQASSPMVGTLSGLGNAGSLASGVNLNSGVDISGMFNVSTLGSAPAVISGFGNLGNHVSQVSI
GLLAMLTSGGSGGSGQPSIIDAAIAELRHLNPLNIVNLGNVGSYNLGFANVGDVNLGAGNLGNLNLGGGNLGGQNLGLGNLGDGN
VGFNGLGHGNVGFNSGLGALPGIIGNIGLGNAGSNVGFNMGLGNIGFNGTGTNNLIGLGTGDNQTFGGGLNSGAGNLGLFNSG
TGNIGFFNTGTGNWGLFNSGSYNTGIGNSGTGSTGLFNAGSFNTGLANAGSYNTGSLNAGTNTGGFNPGNVNTGWFNAGHTNTG
GFNTGNVNTGAFNSGSFNNGALWTDHHLVGFYSIEITGSTLVDINETLNLGPVHIDQIDIPGMSLFDIHELNVNIGPFRIEPI
DVPVAVLDIHEITMVIPIVFLPSMTIGGQTYTIPLDTPAPAPPPFRLPLLFVNALGDNWIVGASNSTGMSGGFVTAPTQGILIH
TGSSATTGSLALTLPTVTIPTITTTSPIPLKIDVSGGLPAFTLFPGGNLIPQNAIPLTIDASGVLDPITIFPGGFTIDPLPLSLA
LNISVDPDSSVPIIIVPPTPGFGNATATPSSGFFNSGAGGVSGFGNFGAGSSGWWNQAAHALAGAGSGVNLVNTLNSGVNLVNGSGI
SGLYNTAIVGLGTPALVSGAGNVGQQLSGVLAAGTALTQSPIINLGLADVGNYNLGLGNVGDVNLGAANLGLNLGLGNIGNANV
GFGNIGHGNVGFNSGLGALGIGNIGLGNAGSTNVGLANMGVGNIGFANTGTNNLIGLGTGDNQTFGGGLNSGAGNIGLFNSTG
GNIGFFNSGTGNWGLFNSGSFNTGIGNSGTGSTGLFNAGGFTTGLANAGSYNTGSFNVDGNTGGFNPGSINTGWFNTGNANTGI
ANSNPVDTGALMSGNFNGILWRGNYEGLFSYSYSLDVPRITILDAGHTGAFGPVVVPPVPLVLAINAHLTGNAMGAFTIIPQIDI
PALNPNVTGVSVGFPIAVPSVTIPALTAARAVLDMASVATSEIEPFIVWTSAGIPTWYSVGRINAGDLFVGGNIIISGIPT
LSTTGVPVHAVFNAASQAFNTPALNIHQIPLGFQVPGSIDAITLFPGGTLFPANSLNLDVFGTGPATIPAITFPEIPANADGEL
YVIAGDIPLINIPPTPGIGNTTTVPSSGFFNTGAGGGSGFGNFGANMSGWWNQAHALAGAGSGIANVGTTLHSGVNLNLSGLSGI
YNTSTLPLGTPALVSGLGNVGDHLSGLLASNVGQNPITIVNIGLANVGNVGLGNIGNLNLGAANIGDVNLGFGNIGDVNLGFG
NIGGGNVGFNGIGDANFGFGNSGLAAGLAGMGNIGLGNAGSGNVGWANMGLGNIGFNGTGTNNLIGLGTGDNQSGIGGLNSGTGN
IGLFNSTGNIIGFFNSGTANFGLFNSGSYNTGIGNSGVASTGLVNVAGGFNTGVANAGSYNTGSFNAGDNTGGFNPGSTNTGWFN
TGNANTGVANAGNVNTGALITGNFNSGILWRGNYEGLAGFSFGYPIPLFPVAGADVTDIGPATIIPPIHIPSIPLGFAAIGHIG
PISIPNIAIPSIHLGIDPTFDVGPITVDPITLTIPLGLSLDAAVSEIRMTSGSSSGFKVRPSFSFFAVGPDGMPGGEVSILOPFTV
APINLNPITLHFPFGFTIPTGPIHIGLPLSLTIPGFTIPGGTLIPQLPLGLGLSGGTPPFDLPTVVIDRIPVELHASTTIGPVSLP
IFGFGGAPGFGNDTTAPSSGFFNTGGGGSGFSNSGSGMSGVNLNAISDPLLGASGFANFGTQLSGIILNRGAGISGVYNTGTGLGL
VTSAFVSGFMNVGQQLSGLLFACTGP"
```

CDS

```
complement(3755952..3767102)
/gene="PPE56"
/locus_tag="Rv3350c"
/experiment="EXISTENCE: identified in proteomics study"
/note="Rv3350c, (MTV004.07c), len: 3716 aa. PPE56, Member of the Mycobacterium tuberculosis PPE family of Gly-, Ala-,Asn-rich proteins, similar to many Mycobacterium tuberculosis proteins from strains H37Rv and CDC1551, e.g. O50378|Rv3347c|MTV004.03c (3157 aa), FASTA scores: opt: 6497, E(): 0, (61.65% identity in 3756 aa overlap); MTCY28_16, MTV050_2, MTY13E10_17, MTCY63_10, MTCY180_1, MTCY63_9, MTV050_1, MTV014_3, MTY13E10_15; etc."
/codon_start=1
/transl_table=11
/product="PPE family protein PPE56"
/protein_id="YP_177964.1"
/db_xref="GI:57117096 GeneID:888113"
/translation="MEFPVPLPEINSVLMYSGAGSSPLLAAAAAWDGLAEELGSAAVSFGQVTSGLTAGVWQGAAAAAMAAAAAP
YAGWLGSVAAAAEAQAVAVAGQARVVVGVFEAALAATVDPALVAANRARLVALAVSNLLGQNTPAIAAAEA EYELMWAADVAAMAGYHS
GASAAAAALPAFSPPAQALGGVGAFLTALFASPAAKALSLNAGLGNVGNVNVGLGNVGVFNLGAGNVGGQNLGFGNAGGTVNVGFG
NLGNVNVGFNSGLGAGLAGLGNIGLGNAGSSNYGFANLGVGNIGFNGTGTNNVGVGLTGNHLTGIGGLNSGTGNIGLFNSTGNI
VGFNNSGTGNFGVFNSSGYSYNTGVGNAGTASTGLFNAGNFNTGVNVVGSYNTGSFNAGDNTGGFNPGGVNTGWLNTGNTNTGIAN
SGNVNTGAFISGNFNSGVLWVGDYQGLFGVSAGSSIPAIPIGLVNLGDIGPITIQPIPIPLPTIPLSIHQTVNLGPLVVPDIVIPA
FGGGIGIPINIGPLTITPITLFAQQTFVNQLPFPFTFSLGKITIPQIQTFDSNGQLVSF IGPIVIDTTPGPTNPQIDLTIRWDT
PITLFPNGISAPDNPLGLLVSVSISNPGFTIPGFSVPAQPLPLSIDIEGQIDGFSTPPITIDRIPLTVGGGVITGPIITIQGLHIP
```

AAPGVGNTTTAPSSGFFNMSGAGGVSQGFVGNVAGSSGWWNQAPSALLGAGSGVNVGTLGSGVNLNLSGSGISGFYNTSVLPFGTAA  
VSGIGNLGGQQLSGVSAAGTTLRSMLAGNLGLANVGNFTGFGVGNVDVNLGAANIGHNLGIGNVGDGDLGNIGHGNLGFANLGL  
LTAGAAGVNGVGNAGINNYGLANMGVGNIGFANTGTGNIIGVGLVDHRTGIGGLNSGIGNIGLFGNSGTGNVGFNSGTGNFGI  
GNSGRFNTGIGNSGTASTGLFNAGSFTSTGIANTGDYNTGSFNAAGDNTGGFNPGGINTGWFNTHANTGLANAGTFTGTGAFMTGD  
YSNGLLWRRGGYEGLVGVVRVGPPTISQFPVTVHAIGGVGPLHVAVPVPVAVHVEITDATTVGLGPFVTPPISIPSLPIASITGSVDLA  
ANTISPIRALDPLAGSIGLFLLEPFRSDPFITIDAFQVAVGLFLENIIVPGLTVSGQILVTPPTIPLTLNLDLTPWTLFPNGFT  
IPAQTPTVTVGMEVANDGFTFFPGGLTFPRASAGVTGLSVGLDAFTLLPDGFTLDTVPATFDGTILIGDIPPIIDVPAVPGFGNT  
TTAPSSGFFNTGGGGSGFANVAGAGTSGWVWQGHVLAGAGSGVANAGTSSGVLNVGSGISGWYNTSTLGAAGTAVVSGIGNLG  
QQLSGFLANGTVLNRSPIVNIGWADVAFNTGLGNVGLNWAANIGAQNGLGNLGSNGVGFNIGAGNVGFANSGPAVGLAGL  
GNVGLSNAGSNNWGLANLGVGNIGLANTGTGNIGIGLVGDYQGTGIGGLNSGSGNIGLFGNSGTGNVGFNTGTGNFGLFNSGSFNT  
GIGNSGTSTGLFNAGNFNTGIANPGSYNTGSFNVGDTNTGGFNPGDINTGWFNTHMNTGTRNTGALMSGTDSNGMLWRGDHEG  
LFGLSYGITIPQFPIRITTTGGIGPIVIPDITLPLHLQITGDADYSFTVPDIPPAIHIGINGVTVGFTAPEATLLSALKNN  
GSFISFGPITLSNIDIPPMDFTLGLPVLGPITGQLGPIHLEPIVVAGIGVPLEIEPIPLDAISLSESIPIRIPVDIPASVIDGIS  
MSEVVPIDASVDIPAVTITGTTISAIPLGFDIRTSAGPLNIPIDIPAAPGFGNSTQMPSSGFFNTGAGGGSGIGNLGAGVSGLL  
NQAGAGSLVGTLSGLGNAGTLASGVVNSGTAISGLFNVSTLDATTPAVISGFSNLGDHMSGVSDGLIAILTFPPAESVFDQIID  
AAIAELQHLDIGNALALGNVGGVNLGLANVGEFNLGAGNVGNINVGAGNLGGSNLGLGNVGTGNLGFNIGAGNFVGFNAGLTA  
AGGLGNVGLGNAGSGSWGLANVGVGNIGLANTGTGNIGIGLTDGYRTGIGGLNSGTGNLGLFNSGTGNIGFFNTGTGNFGLFNSG  
SYSTGVNAGTASTGLFNAGNFNTGLANAGSYNTGSLNVGSFNTGGVNPVTNTGWFNTHMNTGTRNTGALMSGTDSNGMLWRGDHEG  
ALWTFYHGLVGFSSFSIDIAGSTLLDLNETLNLGPIHIEQIDIPGMSLFDVHEIVEIGPFTIPQVDVPAIPLEIHEIHSIHMDPIVL  
VPATTIPAQTRTIPLDIPASPGSTMTLPLISMRFEGEDWILGSTAAIPNFGDVDFPAPTQGITIHTGPGPPTGELKISIPGFEIP  
QIATTRFLLDVNISSGLPAFTLFAAGLTIPTNAIPLTIDASGALDITIFPGGYTIDPLPLHLALNLTVPDSSIPIDVPPPTPGF  
GNTTATPSSGFFNMSGAGGVSQGFVGNVSNLGSWVWQAASALAGSGVNLNVGTLGSGVNLNVGSGVSGIYNTSVLPLGTPAVLSGLG  
NVGHQLSGVSAAGTALNQIPILNIGLADVGNFNVGFVGNVGDVNLGAANLGAQNGLGNVGTGNLGFANVGHGNIIGFNSGLTAGA  
AGLNTGFGNAGSANYGFANQVVRNIGLANTGTGNIGIGLVGDNLGTGIGGLNSGAGNIGLFGNSGTGNIGFFNSGTGNFGIGNSGS  
FNTGIGNSGTSTGLFNAGSFNTGVANAGSYNTGSFNAAGDNTNTGGFNPGTINTGWFNTHMNTGTRNTGALMSGTDSNGMLWRGDHEG  
LWRGDHEGLFSLFYSLDVPRITIVDAHLDDGGFGPVLPPIVPAVNAHLTGNVAMGAFTIPQIDIPALTPNITGSAAFRIVGVS  
RIPPVSVIVEQIINASVGAEMRIDPFEMWTQGTNGLGIFTYFSGSADGSPYATGPLVFGAGTSDGSHLTISSASSGAFTTPQLETG  
PITLGFQVPGSVNAITLFPAGLTFPATSLNLDVDTAGAGVDIPAITWPEIAASADGSVYVLAASSIPLINIPPTPGIGNSTITPS  
SGFFNAGAGGGSGFGNFGAGTSGWVWQAHTALAGAGSGFANVGTLSHSGVNLGSGVSGIYNTSTLGVGTPALVSGLGNVGHQLSG  
LLSGGSAVNPVTVLNIGLANVGSNAGFGNVGEVNLGAANLGAHNLGFGNIGAGNLGFGNIGHGNVGVNSGLTAGVPLGNVGL  
GNAGNNWGLANVGVGNIGLANTGTGNIGIGLTDGYQGTGIGGLNSGAGNLGLFNSGAGNVGFFNTGTGNFGLFNSGSFNTGVGNS  
GTGSTGLFNAGSFNTGVANAGSYNTGSFNVGDTNTGGFNPGSINTGWLNAGNANTGVANAGNVNTGAFVNTGNFNSGILWRGDYQG  
LAGFAVGYTLPLFPAVGADVSGGIGPITVLPPIHIPPIVGFVAVGGGIPAIIPDISVPSIHLGLDPAVHVSITVNPITVTRTP  
VLVSYSQGAVTSTSGPTSEIWKPSFFPGIRIAPSSGGATSTQGAYFVGPISIPSGTVTFPGFTIPLDPIIDIGLVPVSLTIPGFT  
IPGGTLIPTLPLGLALSNGIPPVDIPAIVLDRIILLDLHADTTIGPINVPIAGFGGAPGFGNSTLPLSSGFFNTGAGGGSGFSNTG  
AGMSGLLNAMSDPLLGSAGSFANFGTQLSGILNRGAGISGVYNTGALGVVTAAVVSGFVGNVQQLSGLLFTGVGP"

CDS

3842239..3843739  
/gene="PPE57"  
/locus\_tag="Rv3425"  
/note="Rv3425, (MTCY78.04c), len: 176 aa. PPE57, Member of the M. tuberculosis PPE family, similar to many e.g. O06246|Rv3429|MTCY77.01 (178 aa), FASTA scores: opt: 781, E(): 7e-44, (69.9% identity in 176 aa overlap); and downstream Q50702|YY26\_MYCTU|Rv3426|MTCY78.03c (232 aa), FASTA scores: opt: 517, E(): 1.2e-26, (68.0% identity in 125 aa overlap); MTV049\_11, MTCY428\_16, MTV049\_22, MTV049\_30, MTCY261\_4; etc."  
/codon\_start=1  
/transl\_table=11  
/product="PPE family protein PPE57"  
/protein\_id="YP\_177971.1"  
/db\_xref="GI:57117105 GeneID:887635"  
/translation="MHPMIPAEYISNIIYEGPGADSLFFASGQLRELAYSVETTAESLEDELDENWKGSDDLADAVERYLQWLSKHSSQLKHAAWVINGLANAYNDTRRKVVPEEIAANREERRRLIASNVAGVNTPAIADLDAQYDQYRARNVAVMNAYVSWT  
RSALSDLPRWREPPQIYRGG"

CDS

3843036..3843734  
/gene="PPE58"  
/locus\_tag="Rv3426"  
/experiment="EXISTENCE: identified in proteomics study"  
/note="Rv3426, (MTCY78.03c), len: 232 aa. PPE58, Member of the M. tuberculosis PPE family, similar to many e.g. the downstream O06246|Rv3429|MTCY77.01 (178 aa), FASTA scores: opt: 555, E(): 6.5e-26, (72.0% identity in 125 aa overlap); and upstream Q50703|YY25\_MYCTU|Rv3425|MTCY78.04c (176 aa), FASTA scores: opt: 517, E(): 1.1e-23, (68.0% identity in 125 aa overlap); MTV049\_30, MTCY3C7\_24, MTCY428\_16, MTCY3A2\_22; etc."  
/codon\_start=1  
/transl\_table=11  
/product="PPE family protein PPE58"  
/protein\_id="YP\_177972.1"  
/db\_xref="GI:57117106 GeneID:887622"  
/translation="MHLMIPAEYISNVIYEGPRADSLYAADQRLRQLADSVRTTAESLNTTLDLHENWKGSSEWMADAALRYL

CDS

DWLSKHSRQILRTARVIESLVMAYEETLLRVVPPATIANNREEVRRLIASNVAGGKHSNRRRPRGTIRAVPGRKYPNSNGPLSKLD  
PICAIEAAPMAGAAADPQERVGPGRRRGLAGQQQCRGRPGPSLRCSHDTPRFQMNQAFHMTMVNMLLTCFACQEKPR "  
3847165..3847701  
/gene="PPE59"  
/locus\_tag="Rv3429"  
/note="Rv3429, (MTCY77.01), len: 178 aa. PPE59, Member of the M. tuberculosis PPE family, similar to many e.g. the upstream Q50703|YY25\_MYCTU|Rv3425|MTCY78.04c (176 aa),FASTA scores: opt: 781, E(): 1.9e-44, (69.9% identity in 176 aa overlap); and Q50702|YY26\_MYCTU|Rv3426|MTCY78.03c (232 aa), FASTA scores: opt: 555, E(): 1.7e-29, (72.0% identity in 125 aa overlap) (but diverges at 3' end); etc."  
/codon\_start=1  
/transl\_table=11  
/product="PPE family protein PPE59"  
/protein\_id="YP\_177973.1"  
/db\_xref="GI:57117107 GeneID:887630"  
/translation="MHPMIPAEYISNIIYEGPGADSLSAAAEQRLRLMYNSANMTAKSLTDRLGELQENWKGSSSDLMADAAGRYL  
DWLTKHSRQILETAYVIDFLAYVYEETRHKVVPATIANNREEVHRLIASNVAGVNTPAIAGLDAQYQQYRAQNIAMVNDYQSTA  
RFILAYLPRWQEPPIYGGGGG"

CDS

3894426..3895607  
/gene="PPE60"  
/locus\_tag="Rv3478"  
/gene\_synonym="mtb39c"  
/experiment="EXISTENCE: identified in proteomics study"  
/note="Rv3478, (MTCY13E12.31), len: 393 aa. PPE60 (alternate gene name: mtb39c). Member of the M. tuberculosis PPE family, highly similar to others e.g. Q11031|YD61\_MYCTU|Rv1361c|MT1406|MTCY02B10.25c (396 aa),FASTA scores: opt: 2165, E(): 1.1e-109, (85.35% identity in 396 aa overlap); MTCI364.08; MTCY10G2.10; MTCY03A2.22c; MTCY274.23c; MTCY164.34c; MTCY98.0029c; etc.Note that expression of Rv3478 was demonstrated in lysates by immunodetection (see Dillon et al., 1999)."  
/codon\_start=1  
/transl\_table=11  
/product="PE family protein PPE60"  
/protein\_id="YP\_177976.1"  
/db\_xref="GI:57117111 GeneID:888047"  
/translation="MVDFGALPPEINSARMYAGPGSASLVAAAKMWDSVASDLFSAASAFQSVVWGLTVGSGWIGSSAGLMAAAAS  
PYVAWMSVTAGQAQLTAAQVRVAAAAYETAYRLTVPPPVAIENRTELMTLTATNLLGQNTPAIEANQAAYSQMVGQDAEMYGYA  
ATAATATEALLPFEDAPLITNPGGLLEQAVAVEEAIIDTAAANQLMNNVPQALQQLAQPAQGVVPSKLGGLWTAVSPHLSPLSNV  
SSIANNHMSMMGTGVSMTNTLHSMKGLAPAAAQAVETAENGVMAMSSSLGSQLGSSSLGSSGLGAGVAANLGRAASVGSLSVPPA  
WAAANQAVTPAARALPLTSLTAAQTAPGHMLGGLPLGHSVNAVSGINNALRVPARAYAIPTPAAG"

CDS

3969343..3970563  
/gene="PPE61"  
/locus\_tag="Rv3532"  
/note="Rv3532, (MTCY03C7.24c), len: 406 aa. PPE61, Member of the Mycobacterium tuberculosis PPE protein family, similar to many, e.g. O53956|Rv1807|MTV049.29 (403 aa),FASTA scores: opt: 954, E(): 1.1e-43, (44.1% identity in 417 aa overlap)"  
/codon\_start=1  
/transl\_table=11  
/product="PPE family protein PPE61"  
/protein\_id="YP\_177984.1"  
/db\_xref="GI:57117120 GeneID:888370"  
/translation="MFMDFAMLPPEVNSTRMYSVSGPAGSLWAAAAAWDQVSAELQSAAEFYRSVIAVSLTGWQWLGPPSSVRMGAAV  
TPYVEWLTTLTAAQARQTATQITAAATGFEQAFAMTVPPAIPMANRAQVLSLIATNFFGQNTAAIAALETQYAEMWEQDATAMYDY  
AATSAARTLTPFTSPQDINSAGLPAQSAEVSRTANAGAADGNWLGNNLLEEIGILLPLIAPELTPFFLEAGEIVNAIPFSPV  
GDEFCLLDGLLAWYATIGSINNINSMTGTGIGAENKLGILLPELGSAAAAAAPPADIAFAFLAPLTSMAKSLSDGALRGPGEVSA  
AMRGAGTIGQMSVPPAWKAPAVTTVRAFDATPMTTLPGGDAPAAGVPGLGMPASGAGRAGVVPYGVRLTVMTRPLSGG"  
complement(3970705..3972453)

CDS

/gene="PPE62"  
/locus\_tag="Rv3533c"  
/note="Rv3533c, (MTCY03C7.23), len: 582 aa. PPE62, Member of the Mycobacterium tuberculosis PPE protein family, similar to many, e.g. O53309|Rv3159c|MTV014.03c (590 aa) FASTA scores: opt: 2289, E(): 2.3e-95, (63.5% identity in 600 aa overlap). Predicted to be an outer membrane protein (See Song et al., 2008)."  
/codon\_start=1  
/transl\_table=11  
/product="PPE family protein PPE62"  
/protein\_id="YP\_177985.1"  
/db\_xref="GI:57117121 GeneID:888385"  
/translation="MNYAVLPPELNSLRMFTGAGSAPMLAAVAWGDGLAAELGSAASSFGSVTSDLASQAWQGPAAAAAMAAAAAP  
YAGWLSAAAAARAAGAAQAKAVASAFEARAATVHPLLVAANRNFAQLVMSNWFGLNAPLIAAVEGAYEQMWAADVAAMVGYHS

GAASAAEQLVFPQQALQQLPNLGIGNIGNANLGGGNTGDLNTGNGNIGNTNLGSGNRGDANLGSNGNIGNSNVGGGNTGNGNFGSG  
NGRANLPGSGVNGNGLGNSNLGSGNTGNSNVFGFNTGNNVGTGDNAGSGNIGAGNTGSSNWGFGNNGNIGNIGFNGTGNIGF  
LTGNNQVGIIGGLNNGSGLNGLFNSGTNNVGFNSGTNGNLGIGNSSGATVGPFFVAGHNTGFGNSGSLNTGMGNAGGY  
NTGFNGGAINLGFNGSGLNAGSFNAGSINTGNFNSGQNTGDFNAGVVRNTGWSNSGLTNTGAFNAGSLNTGFGAVGTGSGPNS  
GFGNAGTNNSGFFNTGVGSSGFQNGGSNNSGLQNAVGTVIAAGFGNTGAQTVGIANSGLVNSGFFNSGVHNSGGFNSSENQRSFG  
N"

CDS

3978059..3979498  
/gene="PPE63"  
/locus\_tag="Rv3539"  
/experiment="EXISTENCE: identified in proteomics study"  
/note="Rv3539, (MTCY03C7.17c), len: 479 aa. PPE63, Member of the Mycobacterium tuberculosis PPE protein family, similar to many e.g. O53949|Rv1800|MTV049.22 (655 aa), FASTA scores: opt: 914, E(): 7.3e-47, (37.55% identity in 490 aa overlap); etc."  
/codon\_start=1  
/transl\_table=11  
/product="PPE family protein PPE63"  
/protein\_id="YP\_177987.1"  
/db\_xref="GI:57117123 GeneID:888438"  
/translation="MADFLTLSPEVNSARMYAGGGPGSLSAAAAAWDELAELWLAAASFESVCSGLADRWWQGPSSRMMAAQAA  
RHTGWLAAAATQAEGAASQAQTMALAYEAAFAATVHPALVAANRALVAVLAGSNVFGQNTPAIAAAEAIYEQMWAOQDVVAMLNYH  
AVASAVGARLRPWQQLLHELPRRLGGEHSDSTNTELANPSSTTRITVPGASPVHAATLLPFIGRLLAARYAELNTAIGTNWFP  
TTPEVVSYPATIGVLSGSLGAVDANQSIAGQQLMLHNEILAATASGQPVTVAGLSMGSVIDRELAYLAIDPNAPPSSALTFVEL  
AGPERGLAQTYLVPVGTTPVAGYTVGNAPESQYNTSVVYSQYDIWADPPDRPWNLLAGANALMGAAAYFHDLTAYAAPQQGIEIAA  
VTSSLGGTTTTYMIPTLPLLLPLKQIGVPDWIVGGLNVLKPLVDAGYSQYAPTAGPYFSGHNLVW"

CDS

3997980..3999638  
/gene="PPE64"  
/locus\_tag="Rv3558"  
/note="Rv3558, (MTCY06G11.05), len: 552 aa. PPE64, Member of the Mycobacterium tuberculosis PPE family of glycine-rich proteins, similar to many e.g. P71868|Rv3533c|MTCY03C7.23 (582 aa), FASTA scores: opt: 1908, E(): 1.7e-83, (58.5% identity in 583 aa overlap). Predicted to be an outer membrane protein (See Song et al., 2008)."  
/codon\_start=1  
/transl\_table=11  
/product="PPE family protein PPE64"  
/protein\_id="YP\_177988.1"  
/db\_xref="GI:57117124 GeneID:887822"  
/translation="MAHFSVLPPEINSLRMYLGAGSAPMLQAAAAWDGLAAELGTAASSFSVTTGLTGQAWQGPASAAAAA  
PYAGFLTTASAQAQLAAGQAKAVASVFEEAKAAIVPPAAVAANREAFALIRSNWGLNAPWIAAVESLYEYWAADVAAMTYH  
AGASQAAAQLPLPAGLQQFLNLTLPNLGIGNQGNANLGGGNTGSGNIGNNGKSSNLGGGNGNNGNIGSGNRGSDNFAGNVGTGN  
IGFNGQPIDVNLATPGQNNVGLGNIGNMMGFNTGDANTGGGNTGNGNIGGGNTGNNNFVGFNTGNNNIGIGLGTGNNQMGIN  
LAGLLNSGSGNIGNIGSNTNIGLFGNSGSGNIGVNTGANTLVPGDLNLLGVGNSGNANIGFGNAGVLTGFGNASILNTGLGNA  
GELNTGFGNAGFVNTGFDNSGNVNTGNGNSGNINTGWSNAGNVNTGFGIITDGLTNSGFGNTGTDVSGFFNTPTGPLAVDVSGF  
FNTASGGTVINGQTSIGNIGVPGTLFGSVRSLNTGLFNMGTAISGLFNLRQLLG"

CDS

complement(4060648..4061889)  
/gene="PPE65"  
/locus\_tag="Rv3621c"  
/experiment="EXISTENCE: identified in proteomics study"  
/note="Rv3621c, (MTCY15C10.31, MTCY07H7B.01), len: 413 aa. PPE65, Member of the Mycobacterium tuberculosis PPE family, ala-, gly-rich proteins, similar to many e.g. Q10813|YS92\_MYCTU|Rv2892c|MT2959|MTCY274.23c (408 aa) FASTA scores: opt: 955, E(): 1.8e-42, (44.45% identity in 423 aa overlap)."  
/codon\_start=1  
/transl\_table=11  
/product="PPE family protein PPE65"  
/protein\_id="YP\_177998.1"  
/db\_xref="GI:57117135 GeneID:885097"  
/translation="MLDFAQLPPEVNSALMYAGPGSGPMLAAAAWEALAAELQTTASTYDALITGLADGPWQGSAAASMVAAT  
PQVAWLRSTAGQAEQAGSQAVAAASAYEAAFFATVPPPEIAANRALLMALLATNFLGQNTAAIAATEAQYAEMWAQDAAMYGYA  
GASAAATQLSPFNPAQTINPAGLASQAASVQAVSQAANAQALTDIPKALFGLSGIFTNEPPWLTDLGKALGLTGHTWSSDGS  
LIVGGVLGDFVQGVTSAEELDASVAMDTFGKWWSPARLMVTQFKDYFGLAHDLPKWASEGAKAAGEAAKALPAAVPAIPSA  
VAGAVQQAASVGGKVPVAVWTATTPAASPAVLAASNGLGAAAAAEGSTHAFGGMPLMGSGAGRAFNFAAPRYGFKPTVIAQPPA  
GG"

CDS

complement(4189285..4190232)  
/gene="PPE66"  
/locus\_tag="Rv3738c"  
/note="Rv3738c, (MTV025.086c), len: 315 aa. PPE66, Member of the Mycobacterium tuberculosis PPE family, highly similar to many e.g. O53265|Rv3018c|MTV012.32c (434 aa), FASTA scores: opt: 464, E(): 2.2e-17, (47.05% identity in 338 aa overlap)."

Probably a continuation of the upstream ORF MTV025.87c|Rv3739c|PPE67. At position 97470-72 a stop codon is present which interrupts a possibly longer ORF, observed in related ORFs MTV012\_32 or MTCY21B4\_4. The sequence has been checked and no errors were detected. A similar situation, but with a frameshift separating the ORFs is found in MTV012\_36/MTV012\_35. Sequence similarity is also seen with MTCY251\_15; MTCY261\_19; MLCB2492\_30 from Mycobacterium leprae; MTCY10G2\_10; MTY21C12\_9; MTCI125\_26; MTCY164\_36; MTCY6A4\_1."

/codon\_start=1  
/transl\_table=11  
/product="PPE family protein PPE66"  
/protein\_id="YP\_178009.1"  
/db\_xref="GI:57117150 GeneID:886262"  
/translation="MTTAYASALAAMPPTLTELANHTSHAVLLGTNFFGINTIPIALNEADYARMWIQAATTMSIYEGTSDAALA  
SAPQTTTPAPVLFNGGAGVASALPAISAATLDPASIIIGIIIEIILQLFLISLEILFAIVAYTIIIVLILPLVIFAYAIVFAVLAI  
FGPPLLVIASPFVLTGSVIAVPTSLSTSLSTAVPIGVGQYLADLASADAQAIEVGLKTADVAPVAVRPAAPPLRESAAVRPEAR  
LVSAVAPAPAGTSASVLSADRAGVGLGFAGTAGKESVGRPAGLTTLAGGEFGGSPSVPMPASWEQLVGAGEAG"  
complement(4190284..4190517)  
/gene="PPE67"  
/locus\_tag="Rv3739c"  
/note="Rv3739c, (MTV025.087c), len: 77 aa. PPE67, Member of the Mycobacterium tuberculosis PE family, showing high homology with O53269|Rv3022c|MTV012.36c (82 aa) FASTA scores: opt: 398, E(): 1.2e-19, (74.0% identity in 77 aa overlap); and similar to the N-termini of other PPE proteins e.g. O53265|Rv3018c|MTV012.32c (434 aa) FASTA scores: opt: 398, E(): 4.8e-19, (74.0% identity in 77 aa overlap). ORF ends at the stop codon at position 97470, which is not present in similar ORFs: MTV012\_32, or MTCY21B4\_4. Sequence homology with MTV012\_32, and MTCY21B4\_4 continues in the downstream ORF MTV025.086c|Rv3738c|PPE66. Sequence was checked, but no errors were detected. A similar situation, but with a frameshift separating the ORFs, is found in MTV012\_36/MTV012\_35. Also ORF MTV025.87c shows similarity to MTV03\_14; MTCY6A4\_1; MTV035\_8; MTV037\_17; MLCB2492\_30; MTCY261\_19; MTCY251\_15; MTCY3A2\_23; MTCY28\_16; etc."  
/codon\_start=1  
/transl\_table=11  
/product="PPE family protein PPE67"  
/protein\_id="YP\_178010.1"  
/db\_xref="GI:57117151 GeneID:886257"  
/translation="MTAPIWFASPPEVHSALLSAGPGPASLQAAAAEWTSLSAEYASAAQELTAVLAAVQGGAWEGPSAEAYVAA  
HLPYLA"

CDS

CDS

```

4221604..4222710
/gene="PPE68"
/locus_tag="Rv3873"
/experiment="EXISTENCE: identified in proteomics study"
/note="Rv3873, (MTV027.08), len: 368 aa. PPE68, Member of the Mycobacterium tuberculosis PPE family, highly similar to many e.g. O33085|ML0051|MLCB628.14c from Mycobacterium leprae (302 aa), FASTA scores: opt: 656, E(): 2.8e-24, (46.2% identity in 288 aa overlap); and O53691|Rv0286|MTV035.14 (513 aa), FASTA scores: opt: 566, E(): 7.8e-20, (35.25% identity in 363 aa overlap). A core mycobacterial gene; conserved in mycobacterial strains (See Marmiesse et al., 2004). Predicted possible vaccine candidate (See Zvi et al., 2008)."
```

CDS

```

/complement(4245013..4246212)
/gene="PPE69"
/locus_tag="Rv3892c"
/experiment="EXISTENCE: identified in proteomics study"
/note="Rv3892c, (MTCY15F10.20), len: 399 aa. PPE69, Member of the Mycobacterium tuberculosis PPE family of conserved proteins, similar to many e.g. O05298|Rv1196|MTCI364.08 from Mycobacterium leprae (391 aa), FASTA scores: opt: 348, E(): 2.2e-08, (26.6% identity in 380 aa overlap)."
```

misc\_feature complement(3295265..3296341)  
/gene="PPE47"  
/locus\_tag="Rv3021c"  
/note="Rv3021c, (MTV012.35c), len: 358 aa. PPE47, Member of Mycobacterium tuberculosis PPE family. Should be continuation of upstream ORF MTV012.36c but is frameshifted due to missing base at 36448 in v012. Sequence has been checked but no error apparent. Very similar to neighbouring ORF O53265|MTV012.32c|Rv3018c from Mycobacterium tuberculosis (434 aa), FASTA scores: opt: 1714, E(): 6.6e-770, (78.3% identity in 355 aa overlap) and AAK47430|MT3101 (strongly in the N-terminal part) (310 aa),FASTA scores: opt: 897, E(): 4.5e-37, (66.95% identity in 227 aa overlap)."  
/pseudogene="unknown"  
/db\_xref="PSEUDO:CCP45828.1"

misc\_feature complement(3296329..3296571)  
/gene="PPE48"  
/locus\_tag="Rv3022c"  
/note="Rv3022c, (MTV012.36c), len: 81 aa. PPE48, Member of M. tuberculosis PPE family with frameshift due to missing bp in codon 82. The ORF continues in downstream MTV012.35c. The sequence has been checked and no errors were detected. Identical to neighbouring ORF O53265|Rv3018c|MTV012.32c (434 aa), FASTA scores: opt: 526, E(): 6.2e-26, (100.0% identity in 81 aa overlap); and O69706|Rv739c|MTV025.087c (77 aa),FASTA scores: opt: 392, E(): 3.4e-18, (72.7% identity in 77 aa overlap)."  
/pseudogene="unknown"



CDS 33582..33794  
 /locus\_tag="Rv0031"  
 /note="Rv0031, (MTCY10H4.31), len: 70 aa. Possible remnant of a transposase, showing partial similarity to mycobacterial transposases in a short overlap, e.g. Rv2791c|MTV002\_57 (459 aa), FASTA score: (72.2% identity in 36 aa overlap); Rv2885c, Rv2978c, Rv3827c, etc."  
 /codon\_start=1  
 /transl\_table=11  
 /product="Possible remnant of a transposase"  
 /protein\_id="NP\_214545.1"  
 /db\_xref="GI:15607173 GeneID:887049"  
 /translation="MLARHFAGGRKAHSRAVATLTKADIQAWHPAGIQTPKPRCESDVFARIGHTSHPSTRKSRVGPASEAPLA"

CDS 649489..650232  
 /locus\_tag="Rv0606"  
 /note="Rv0606, (MTCY19H5.16c), len: 247 aa. Possible truncated transposase for IS\_1536 element, highly similar to N-terminus of other transposases from Mycobacterium tuberculosis e.g. YX16\_MYCTU|Q10809|Rv2885c|MT2953|MTCY274. 16c putative transposase from Mycobacterium tuberculosis (460 aa), FASTA scores: opt: 1368, E(): 0, (83.5% identity in 237 aa overlap); Rv2978c, Rv0922, Rv3827c, etc. Also similar to N-terminus of MTV002\_57|Rv2792 resolvase from M. tuberculosis (193 aa), FASTA score: (87.4% identity in 238 aa overlap). This region is a possible MT-complex-specific genomic island (See Becq et al., 2007)."  
 /codon\_start=1  
 /transl\_table=11  
 /product="Possible transposase (fragment)"  
 /protein\_id="NP\_215120.1"  
 /db\_xref="GI:15607746 GeneID:887889"  
 /translation="MPRLEIPNGWCVQAFRFTLDPTAEQAHALARHFGARRKAYNWTVAQLKADIQAWRATGAQTAKPSLRVLRKRWNTVKDEVCVNAETGTVVWPECSKEAYADGIAGAVDAYWNWQORRAGKRDGKRMGFPRFKKKGRDADRVSFITGAMRVEPDRRLTLPLVIGCVRTHENTRRIERLIIAKDRARVLAITVRRNGTRLDASVRVLVQRPQQPNVELPESRIGVDVGVRRRLATVATADGACCPVLVPDG"

CDS 780007..780321  
 /locus\_tag="Rv0741"  
 /note="Rv0741, (MTV041.15), len: 104 aa. Probable truncated transposase for IS1557, showing similarity to transposases and is elements e.g. U63997|EFU63997\_1 insertion sequence from Enterococcus faecium (424 aa), FASTA score: (31.0% identity in 87 aa overlap). Very high similarity with the C-terminal part of Z73419|MTCY373\_3 2 IS1557 from Mycobacterium tuberculosis (444 aa), FASTA score: (86.5% identity in 104 aa overlap). This region is a possible MT-complex-specific genomic island (See Becq et al., 2007)."  
 /codon\_start=1  
 /transl\_table=11  
 /product="Probable transposase (fragment)"  
 /protein\_id="NP\_215255.1"  
 /db\_xref="GI:15607881 GeneID:888644"  
 /translation="MFSVKGEEGKQALDRWISWARRCRIPVFVELAGGIVRHRQAIDAALDHGLWQGLIESTNTKIRLLTRIAFGFRSPEALIALAMLALGGRRPALPGRTKHPRISQ"

CDS complement(787564..787749)  
 /locus\_tag="Rv0755A"  
 /note="Rv0755A, len: 61 aa. Putative transposase (possibly gene fragment), similar to C-terminal part of Q9EZM2|ISMav2|AF286339\_1 putative transposase from Mycobacterium paratuberculosis (395 aa), FASTA scores: opt: 284, E(): 5e-13, (83.02% identity in 53 aa overlap); and to SCJ11.25c|Q9RI80 possible noncomposite transposon transposase from Streptomyces coelicolor (283 aa)."  
 /codon\_start=1  
 /transl\_table=11  
 /product="Putative transposase (fragment)"  
 /protein\_id="YP\_177633.1"  
 /db\_xref="GI:57116778 GeneID:3205072"  
 /translation="MKELSVAEQRYQAVLAVISDGLSISQVAEKVGVSRQTLHTWLARYEAEGLDGLRIGTGTAI"

CDS 826294..826620  
 /locus\_tag="Rv0795"  
 /experiment="EXISTENCE: identified in proteomics study"  
 /note="Rv0795, (MTV042.05), len: 108 aa. Putative transposase for IS6110 (fragment), identical to Q50686 insertion element IS6110 (108 aa), FASTA score: (100.0 % identity in 108 aa overlap). The transposase described here may be made by a frame shifting mechanism during translation that fuses Rv0795 and Rv0796, the sequence UUUUAAAG (directly upstream of Rv0796) maybe responsible for such a frameshifting event (see McAdam et al., 1990)."  
 /codon\_start=1  
 /transl\_table=11  
 /product="Putative transposase for insertion sequence element IS6110 (fragment)"  
 /protein\_id="NP\_215310.1"  
 /db\_xref="GI:15607935 GeneID:885454"  
 /translation="MSGGSSRRYPPELRERAVRMVAEIRGQHDSEWAAISEVARLLGVGCAETVRKWRQAQVDAGARPGTTTEES AELKRLRRDNAELRRANAILKTASAFFAAELDRPAR"

CDS 826569..827555  
 /locus\_tag="Rv0796"  
 /experiment="EXISTENCE: identified in proteomics study"  
 /note="Rv0796, (MTV042.06), len: 328 aa. Putative transposase for IS6110. Identical to many other M. tuberculosis IS6110 transposase subunits. The transposase described here may be made by a frame shifting mechanism during translation that fuses Rv0795 and Rv0796, the sequence UUUUAAAG (directly upstream of Rv0796) maybe responsible for such a frameshifting event (see McAdam et al., 1990). Start changed since first submission (+ 50 aa)."  
 /codon\_start=1  
 /transl\_table=11  
 /product="Putative transposase for insertion sequence element IS6110"  
 /protein\_id="NP\_215311.2"  
 /db\_xref="GI:448824749 GeneID:885099"  
 /translation="KDRVGFLLRGRARPASTLITRFIADHQHREGPDGLRWGVESICTQLTELGVPIAPSTYYDHINREPSRREL RDGELKEHISRVAANYGVYGARKVWLTNLNREGIEVARCTVERLMTKLGSLGTTTRGKARRTTIADPATARPADLVQRRFRGPPAPN RLWVADLTYVSTWAGFAYVAFVTDAYARRILGWRVASTMATSMVLDIAIEQAIWTRFQQEGVLDLKDVIHHTDRGSQYTSIRFSERL AEAGIQPSVAVGSSYDNALAEETINGLYKTELIKPGKPWRSIEDVELATARWVDWVFNHRRLYQYCGDVPVPELEAAYYAQRQRPA AG"

CDS 827610..828704  
 /locus\_tag="Rv0797"  
 /note="Rv0797, (MTCI249B.03c, MTV042.07), len: 364 aa. Putative transposase for IS1547; almost identical to (but 20 aa shorter than) Y13470|MTY13470\_2 from Mycobacterium tuberculosis (383 aa). Also similar to other transposases e.g. MAIS1110A\_1|Q48909 transposase from Mycobacterium avium (464 aa), FASTA scores: opt: 226, E(): 2.4e-08, (30.7% identity in 199 aa overlap). Also slight similarity to Rv2014|MTCY39.03c from Mycobacterium tuberculosis (222 aa), FASTA score: (24.8% identity in 141 aa overlap)."  
 /codon\_start=1  
 /transl\_table=11  
 /product="Putative transposase for insertion sequence element IS1547"  
 /protein\_id="NP\_215312.1"  
 /db\_xref="GI:15607937 GeneID:885476"  
 /translation="MVVVGTDAHKYSHTFVATDEVGRQLGKTKVATTAGHATAIMWAREQFGLELIWGIEDCRNMSARLERDLL AAGQQVVRVPTKLMAQTRKSARSRGKSDPIDALAVARAVMRETDLPLATHDETSRELKLLTDRRDVLAQRTSAINRLRWLVHEL DPERAPAARSLDAAKHQQALRTWLDTQPGLVAELARAELTDIIRLTGIEINTLAQRISARVHQVAPALLEIPGCAELTAAKIVGEA AGVTRFKSEAAFACHAAVAPIPVWSGNTAGQMRLSRSGNRQLNAAALHRIALTQIRMTDSRGQAYYQRLQDAGKTKRAALRCLKRR LARTVVFQALRTVHQPSSEHTQPAAACHRSYCSRSCLSG"

CDS 858797..859087  
 /locus\_tag="Rv0829"

```

/note="Rv0829, (MTV043.21), len: 96 aa. Possible transposase for IS1605' (fragment),
similar to C-terminal end of many mycobacterial transposases and hypothetical
proteins e.g. Z74024|MTCY274_16 from Mycobacterium tuberculosis (460 aa), FASTA
scores: opt: 668, E(): 6.2e-32, (98.9% identity in 93 aa overlap); MTV002_57|O33333
transposase from Mycobacterium tuberculosis ; L07627|SERRY1_1 insertion element
IS1136 from Saccharopolyspora erythraea (90 aa), FASTA score: (34.9% identity in 83
aa overlap)."
```

CDS

```

/codon_start=1
/transl_table=11
/product="Possible transposase (fragment)"
/protein_id="NP_215344.1"
/db_xref="GI:15607969 GeneID:885403"
/translation="MGPSSKTCHACRHVQDIGWDEKWQCDGCSITHQRDDNAAINLARYEPPSVVGPVGAAVKRGADRKTGPGP
AGGREARKATGHPAGEQPRDGVLVVA"
879225..879557
/locus_tag="Rv0850"
/note="Rv0850, (MTV043.43), len: 110 aa. Putative transposase (fragment), similar in
part to others e.g. Q45144|Q4514 transposable element IS31831 (436 aa), FASTA scores:
opt: 175, E(): 4.3e-05, (38.6% identity in 57 aa overlap); etc."
```

CDS

```

/codon_start=1
/transl_table=11
/product="Putative transposase (fragment)"
/protein_id="NP_215365.1"
/db_xref="GI:15607990 GeneID:885054"
/translation="MTRDPHSPDCGREGSYRDTITRPLTDLFPVAGYPLVPRVASPRYRCTTPQCGRAVFNQDLANVDQYLVVNQL
AHQLIDGSSSLIPDADKRWDARRHADMTHTLSSLKENQS"
complement(952685..954004)
/locus_tag="Rv0920c"
/experiment="EXISTENCE: identified in proteomics study"
/inference="protein motif:PROSITE:PS01007"
/note="Rv0920c, (MTCY21C12.14c), len: 439 aa. Probable transposase for IS1554, highly
similar to others e.g. MTCY441.35|Q45111 transposase from Mycobacterium tuberculosis
(419 aa), FASTA scores: opt: 1113, E(): 0,(43.9% identity in 378 aa overlap); etc.
Contains transposases mutator family signature (PS01007)."
```

CDS

```

/codon_start=1
/transl_table=11
/product="Probable transposase"
/protein_id="NP_215435.1"
/db_xref="GI:15608060 GeneID:885549"
/translation="MDAAQVIEPAHAGQDVDEAAVAARELSGAERALVGDLVQRARAEGVALTGPDGLLKALTKTVLEAALQEEM
TEHLGYDRHAAAGRSGNSRNGSRNKKVITDACGQVEIAPVPRDRNGTFEPVIVGKRKRRTVDVDRVLSLYAKGLTTGEIAAHFA
DVGVSVSKDTISRITDRVIEEMQAWWSRPLEKVYAAVFIDAIMVKIRDGQVRNRPVYAAIGVDLDGHKDILGMWAGEGDGESAK
FWLAVLTLDRNRGVKDIFFLVCDGLKGLPDSVSAAPPLATVQTCIIHLIRNTRFYASRKYWDKISVDLKPITYAASAAEARLYE
EFAEKWGPYPYPAITRLWDSAWEEFIPFLDYDVEIRRVPCSTNAIESLNARYRRAVRARGHFPNEQSALKTLYLVTRSLDPKGTGQ
TKWAVRWKPALNALAITFADRMPEAEER"
954873..956525
/locus_tag="Rv0922"
/experiment="EXISTENCE: identified in proteomics study"
/note="Rv0922, (MTCY21C12.16), len: 550 aa. Possible transposase for IS1535, similar
to many e.g. YX16_MYCTU|Q10809|MTCY274.16c from Mycobacterium tuberculosis (460 aa),
FASTA scores: opt 939, E(): 0,(40.6% identity in 465 aa overlap); etc."
```

CDS

```

/codon_start=1
/transl_table=11
/product="Possible transposase"
/protein_id="NP_215437.1"
/db_xref="GI:15608062 GeneID:885564"
/translation="MIVMRSCAQAAKVAEATGGVQLAGKPKPDGTPTFSTRYVEIGVDFEHRPVVESVSVLFELYDGDANSYAA
TGGPGAQLPSGWMVTAAKFEVEWPADPQRAGLVRSFHGARRKAFNWGLAQVKADLDKAADPAHESVDWDLKSLRWAWNRAKDDV
APWWAENSKECYSSGLADLAQGLANWKAGKNGTRKGRRVGFPRFKSGRRDPGRVRF'TTGTMRIEDDRRTITVPVIGPLRAKENTR
RVQRHLVSGRAQILNMTLSQRWGRLFVAVCYALRTP'TTRSPLTQPTVRAGMDLGVRTLATVATLDTATGEQTIIEYPNPAPLKAT
LVARRRAGRELSRRIPGSHGHRAVKAKLARLDRRCVHLRREAHHQLTTELAGTYGQVVEDLDVAAMKRSMRRRAFRRSVSDAAM
GLVAPQLAYKTAKCSGVLTVADRWFASSQIHHGCTSPDGTPCRLQGGKRIDKHLCPVVTGEVVDNRNAAALNLRDWPDNASRGPV
GTTAPSA PGPTTTVGTGHGADTGSSGAGGASVRPRPRRAGRGEAKTQTPQGDAA"
complement(1080964..1081353)
/locus_tag="Rv1034c"
/note="Rv1034c, (MTCY10G2.15), len: 129 aa. Probable IS1560 transposase fragment,
similar to part of Rv3387|E1202305|MTV004.45 (225 aa) (65.1% identity in 129 aa
overlap)."
```

CDS

```

/codon_start=1
```

/transl\_table=11  
 /product="Probable transposase (fragment)"  
 /protein\_id="NP\_215550.1"  
 /db\_xref="GI:15608174 GeneID:886010"  
 /translation="MQQGNPPDAPQLAPAVAVWKKRAGRTPRTVTADRGYGEAAVDQQLTEVGVKVNLI PRKGKPSQDRRAEEHR  
 KAFRRTIKWRGTGCEGRISHLKRGYGWRDRIGGLEGTRTWVGHGVFAHNLTISALPA"  
 CDS complement(1081421..1082107)  
 /locus\_tag="Rv1035c"  
 /experiment="EXISTENCE: identified in proteomics study"  
 /note="Rv1035c, (MTCY10G2.14), len: 228 aa. Probable IS1560 transposase fragment,  
 similar to parts of Rv3387|E1202305|MTV004.45 (225 aa) (47.8% identity in 67 aa  
 overlap) and Rv3386|E1202304|MTV004.44 (234 aa) (55.1% identity in 127 aa overlap)."  
 /codon\_start=1  
 /transl\_table=11  
 /product="Probable transposase (fragment)"  
 /protein\_id="NP\_215551.1"  
 /db\_xref="GI:15608175 GeneID:888206"  
 /translation="MPHPTTLMKLTTRCGSAAIDGLNEALLAKAAEAKLLGTNRIRADTTVARANVSYPDTLGLLAKAMRRIAAT  
 GKRIQAAGGAVRTRVGD RSRAAGRRRAHAVA AKLRSRAELGRDEARA AVLRFTGELAE LAQAAAQEAQQLLDNAKQAVLRAKAKAA  
 ALAARGERDAVAGRRCCGLVRAVNDLTEL LNATRQIVAQTRQRVAGITSDGASRRVSLHDGDARPDHQSAR"  
 CDS complement(1082141..1082479)  
 /locus\_tag="Rv1036c"  
 /note="Rv1036c, (MTCY10G2.13), len: 112 aa. Probable IS1560 transposase fragment,  
 similar to part of Rv3386|E1202304|MTV004.44 (234 aa) (82.8% identity in 87 aa  
 overlap)."  
 /codon\_start=1  
 /transl\_table=11  
 /product="Probable IS1560 transposase (fragment)"  
 /protein\_id="NP\_215552.1"  
 /db\_xref="GI:15608176 GeneID:888227"  
 /translation="MIPGRMVLN WEDGLNALVAEGIEAIVFRTLGDQCWLWESLLPDEVRR LPEELARVDALLDDPAFFAPFVFP  
 FDPRRGRPSTPMEVYLQLMFVKFRYRLGYESL CREVADSIT"  
 CDS complement(1084614..1085477)  
 /locus\_tag="Rv1041c"  
 /experiment="EXISTENCE: identified in proteomics study"  
 /note="Rv1041c, (MTCY10G2.08), len: 287 aa. Probable is like-2 transposase, overlaps  
 MTCY10G2.07. Similar to Q00430|X53945 insertion element IS869 hypothetical protein  
 from Agrobacterium tumefaciens (186 aa), FASTA scores: opt: 173, E(): 0.00016, (40.9%  
 identity in 176 aa overlap). Similar to Rv1150, C-terminal part of transposase of  
 putative Mycobacterium tuberculosis is like-1. MTCY10G2.07 and MTCY10G2.08 are  
 frameshifted with respect to Mycobacterium tuberculosis Q50761 transposase, the 10G2  
 cosmid sequence appears to be correct. This region is a possible MT-complex-specific  
 genomic island (See Becq et al., 2007)."  
 /codon\_start=1  
 /transl\_table=11  
 /product="Probable is like-2 transposase"  
 /protein\_id="NP\_215557.1"  
 /db\_xref="GI:15608181 GeneID:888546"  
 /translation="MRASPADGLAITGLSWKGSRGGSVREVRGGTCPLSSGRGKRCGSAITVGRWMPATRCSP TLP R CSGWTLR  
 WPRISRSCCRWIPRTCGHTSIRRAPARTRSPQ GALS DYKKSAD E PDDHAIGRSRGLLTKIHALTDQREAPVRIRL TAGQAGDNP  
 QLLPLLDDYRHASTEYALGSTDFRLLADKAYSHPSTRAALRSKKIKHTIPERQDQIDRRKAKGSAGGRPPAFDAALYGLRNTVER  
 GFHRLKQWRGIATRYDKYALTYLGGVLLACAVIHARVGT PKLGDT P"  
 CDS complement(1085134..1085541)  
 /locus\_tag="Rv1042c"  
 /note="Rv1042c, (MTCY10G2.07), len: 135 aa. Probable is like-2 transposase, similar  
 to Q50761 transposase from Mycobacterium tuberculosis (308 aa), FASTA scores: opt:  
 823, E(): 0, (99.1% identity in 117 aa overlap). Second copy is Rv1149. This region  
 is a possible MT-complex-specific genomic island (See Becq et al.,2007)."  
 /codon\_start=1  
 /transl\_table=11  
 /product="Probable is like-2 transposase"  
 /protein\_id="NP\_215558.1"  
 /db\_xref="GI:15608182 GeneID:888607"  
 /translation="MTRVGVISDEFWAVVEPLMPSHEGKPGRRFSDHRLILEGIAWRFTGSPWRDLPAEFGPWQTVWKRHHRWS  
 LDGTCDEVFAHVA AVFGVDAEVAEDIEKLLSVDSTNVR AHQHSAGACSDTLATGGTVGLQEIRR"  
 CDS 1089465..1090712  
 /locus\_tag="Rv1047"  
 /inference="protein motif:PROSITE:PS01007"  
 /note="Rv1047, (MTCY10G2.02c), len: 415 aa. IS1081 transposase, most similar to

TRAI\_MYCBO|P35882 transposase for insertion sequence element (415 aa), FASTA scores: opt: 2675, E(): 0, (99.8% identity in 415 aa overlap). Contains PS01007 Transposases, Mutator family, signature. This region is a possible MT-complex-specific genomic island (See Becq et al., 2007)."

/codon\_start=1  
/transl\_table=11  
/product="Probable transposase"  
/protein\_id="NP\_215563.1"  
/db\_xref="GI:15608187 GeneID:886060"  
/translation="MTSSHLIDAEQLLADQLAQASPDLLRGLLSTFIAALMGAEADALCGAGYRERSDERSNQNRNGYRHRDFDTR  
AATIDVAIPKLRQGSYFPDWLLQRRKRAERALTSVATCYLLGVSTRRMERLVEITLGVTKLSKSQVSIMAKELDEAVEAFRTRPL  
DAGPYTFLAADALVVLKREAGR VVGVTHTLIATGVNAEGYREILGIQVTS AEDGAGWLAFFRDLVARGLSGVALVTS DAHAGLVAA  
IGATLPAAAWQRCRTHYAANLMAATPKPSWPVVRTLLHSIYDQPD AESVVAQYDRVLDALTDKLPVAEHLDTARTDLLAFTAFP  
KQIWRQIWSNNPQERLNRREVRRTDVGIFPDRASIIRLVGVAVLAEQHDWEIEGRRYLGLEVLTRARAALTSTEEPAKQQTNTNP  
ALTT"

CDS

1097281..1097415  
/locus\_tag="Rv1055"  
/note="Rv1055, (MTV017.08), len: 44 aa. Possible integrase (fragment); first 49 aa similar to Rv2309c|MTCY3G12\_25|Z79702 hypothetical protein (shows similarity to integrases) from Mycobacterium tuberculosis (151 aa), FASTA scores: opt: 291, E(): 2.2e-16, (74.3% identity in 70 aa overlap); and to L39071|MSGINT\_1 integrase from Mycobacterium paratuberculosis (191 aa), FASTA scores: opt: 146, E(): 8.3e-05, (52.1% identity in 48 aa overlap); and to many other integrases or transposases. Shortened since first submission (-34 aa). This region is a possible MT-complex-specific genomic island (See Becq et al., 2007)."

/codon\_start=1  
/transl\_table=11  
/product="Possible integrase (fragment)"  
/protein\_id="NP\_215571.2"  
/db\_xref="GI:57116817 GeneID:887138"  
/translation="MTLDRHGHLNDDLAVWPMRCAKSSRTLRYHCGMRRNRVGLRA"

CDS

1187197..1187604  
/locus\_tag="Rv1149"  
/note="Rv1149, (MTCI65.16), len: 135 aa. Possible transposase. Identical to 117 aa N-terminal region of S21394|X65618 transposase of Mycobacterium tuberculosis (308 aa), FASTA scores: opt: 823, E(): 0, (99.1% identity in 117 aa overlap). Second copy is Rv1042c|MTCY10G2.07."

/codon\_start=1  
/transl\_table=11  
/product="Possible transposase"  
/protein\_id="NP\_215665.1"  
/db\_xref="GI:15608289 GeneID:885164"  
/translation="MTRVGVISDEFWAVVEPLMPSHEGKPGRRFS DHRLLILEGIAWRFRFTGSPWRDLPAEFGPWQTVWKRHRWS  
LDGTCDEVFAHVA AVFGVDAEVAEDIEKLLSVDSTNVRAHQHSAGACSDTLATGGTVGLQEIRR"

CDS

complement(1247218..1248465)  
/locus\_tag="Rv1199c"  
/inference="protein motif:PROSITE:PS00435 protein motif:PROSITE:PS01007"  
/note="Rv1199c, (MTCI364.11c), len: 415 aa. Possible transposase for IS1081, identical to TRAI\_MYCBO|P35882 transposase for insertion sequence element (415 aa); region identical to MTCY441.35 (100.0% identity in 261 aa overlap); and almost identical to MTCY10G2.02c (415 aa) (99.8% identity in 415 aa overlap). Contains PS01007 Transposases, Mutator family, signature, PS00435 Peroxidases proximal heme-ligand signature."

/codon\_start=1  
/transl\_table=11  
/product="Possible transposase"  
/protein\_id="NP\_215715.1"  
/db\_xref="GI:15608339 GeneID:886092"  
/translation="MTSSHLIDTEQLLADQLAQASPDLLRGLLSTFIAALMGAEADALCGAGYRERSDERSNQNRNGYRHRDFDTR  
AATIDVAIPKLRQGSYFPDWLLQRRKRAERALTSVATCYLLGVSTRRMERLVEITLGVTKLSKSQVSIMAKELDEAVEAFRTRPL  
DAGPYTFLAADALVVLKREAGR VVGVTHTLIATGVNAEGYREILGIQVTS AEDGAGWLAFFRDLVARGLSGVALVTS DAHAGLVAA  
IGATLPAAAWQRCRTHYAANLMAATPKPSWPVVRTLLHSIYDQPD AESVVAQYDRVLDALTDKLPVAEHLDTARTDLLAFTAFP  
KQIWRQIWSNNPQERLNRREVRRTDVGIFPDRASIIRLVGVAVLAEQHDWEIEGRRYLGLEVLTRARAALTSTEEPAKQQTNTNP  
ALTT"

CDS

complement(1372009..1373343)  
/locus\_tag="Rv1313c"  
/experiment="EXISTENCE: identified in proteomics study"  
/note="Rv1313c, (MTCY373.33c), len: 444 aa. Possible IS1557 transposase, similar to several transposases e.g. U57649|DBU57649 ORF1 from dibenzofuran-degrading bacterium

DPO360 (163 aa), FASTA scores: opt: 767, E(): 0, (67.3% identity in 168 aa overlap); TNPA\_BORPA|Q06126 transposase for insertion sequence element IS1001 from Bordetella parapertussis (406 aa), FASTA scores: opt: 254, E(): 3.3e-10, (24.9% identity in 402 aa overlap). Also similar to putative Mycobacterium tuberculosis transposases, Rv3798 and Rv0741."

```
/codon_start=1
/transl_table=11
/product="Possible transposase"
/protein_id="NP_215829.1"
/db_xref="GI:15608453 GeneID:886922"
/translation="MRNVRLFRALLGVDKRTVIEDIEFEEDDAGD GARVIARVPRSAVLRRCGRCKASWYDRGAGLRQWRSL
DWGTVEVFLEAEAPRVNCPHPTVVAVPWARHHAGHTYAFDDTVAWLAVACSKTAVCELMRIAWRTVGAIVARVWADTEKRIDR
FANLRRIGIDEISYKRHHRYLTVVVDHDSGRLVWAAFGHKATLGLFFDALGAERAAQITHVSADAADWIADVTERCPDAIQCA
DPFHVVAWATEALDVERRRAWNDARAIARTEPKWGRGRPGKNAAPRGRERARRLKGARYALWKNPEDLTERQS AKLAWIAKTDP
RLYRAYLLKESLRHVFSVKGEEGKQALDRWISWAQRCRIPVFVELAARIKHRHVAIDAALDHGLSQGLIESTNTKIRLLTRIAFG
FRSPQALIALAMLTLAGHRPTLPGRHNHPQISQ"
```

CDS

```
complement(1442829..1443815)
/locus_tag="Rv1369c"
/note="Rv1369c, (MTCY02B12.03c), len: 328 aa. Probable transposase subunit for IS6110. Identical to many other M. tuberculosis IS6110 transposase subunits. The transposase described here may be made by a frame shifting mechanism during translation that fuses Rv1368c and Rv1369c, the sequence UUUUAAAG (directly upstream of Rv1369c) maybe responsible for such a frameshifting event (see McAdam et al., 1990). Start changed since first submission (+ 34 aa)."
```

```
/codon_start=1
/transl_table=11
/product="Probable transposase"
/protein_id="NP_215885.2"
/db_xref="GI:448824756 GeneID:886789"
/translation="KDRVGF LGRARPASTLITRFIADHQGHREGPDGLRWGVESICTQLTELGVPIAPSTYYDHINREPSRREL
RDGELKEHISRVAANYGVY GARKVWLTNLNREGIEVARCTVERLMTKLGLSGTTRGKARRTTIADPATARPADLVQRRFGPPAPN
RLWVADLTYVSTWAGFAYVAFVTDAYARRILGWRVASTMATSMVLDAIEQAIWTRQQEGVLDLKDVIHHTDRGSQYTSIRFSERL
AEAGIQPSVAVGSSYDNALAEATINGLYKTELIKPGKPWRSIEDVELATARVWDFWVFNHRRLYQYCGDVPVVELEAAYYAQRQRP
AG"
```

CDS

```
complement(1443764..1444090)
/locus_tag="Rv1370c"
/note="Rv1370c, (MTCY02B12.04c), len: 108 aa. Putative transposase for IS6110 (fragment), identical to many other Mycobacterium tuberculosis IS6110 transposase subunits e.g. Q50686|YIA4_MYCTU Insertion element IS6110 hypothetical 12.0 kDa protein (108 aa), fasta scores: E(): 1.4e-43, (100.00% identity in 108 aa overlap). The transposase described here may be made by a frame shifting mechanism during translation that fuses Rv1368c and Rv1369c, the sequence UUUUAAAG (directly upstream of Rv1369c) maybe responsible for such a frameshifting event (see McAdam et al., 1990)."
```

```
/codon_start=1
/transl_table=11
/product="Putative transposase for insertion sequence element IS6110 (fragment)"
/protein_id="NP_215886.1"
/db_xref="GI:15608510 GeneID:886791"
/translation="MSGGSSRRYPPELRRERAVRMVAEIRGQHDSEWAAISEVARLLGVGCAETVRKWRQAQVDAGARPGTTTEE
SAELKRLRRD NAELRRANAILKTASAFFAAELDRPAR"
```

CDS

```
complement(1863021..1864007)
/locus_tag="Rv1756c"
/note="Rv1756c, (MTCY28.22c), len: 328 aa. Putative Transposase subunit for IS6110. Identical to many other M. tuberculosis IS6110 transposase subunits. The transposase described here may be made by a frame shifting mechanism during translation that fuses Rv1756c and Rv1757c, the sequence UUUUAAAG (directly upstream of Rv1756c) maybe responsible for such a frameshifting event (see McAdam et al., 1990). Start changed since first submission (+ 34 aa)"
```

```
/codon_start=1
/transl_table=11
/product="Putative transposase"
/protein_id="NP_216272.2"
/db_xref="GI:448824763 GeneID:885541"
/translation="KDRVGF LGRARPASTLITRFIADHQGHREGPDGLRWGVESICTQLTELGVPIAPSTYYDHINREPSRREL
RDGELKEHISRVAANYGVY GARKVWLTNLNREGIEVARCTVERLMTKLGLSGTTRGKARRTTIADPATARPADLVQRRFGPPAPN
RLWVADLTYVSTWAGFAYVAFVTDAYARRILGWRVASTMATSMVLDAIEQAIWTRQQEGVLDLKDVIHHTDRGSQYTSIRFSERL
AEAGIQPSVAVGSSYDNALAEATINGLYKTELIKPGKPWRSIEDVELATARVWDFWVFNHRRLYQYCGDVPVVELEAAYYAQRQRP
AG"
```

CDS complement(1863956..1864282)  
/locus\_tag="Rv1757c"  
/note="Rv1757c, (MTCY28.23c), len: 108 aa. Putative Transposase for IS6110 (fragment), identical to many other Mycobacterium tuberculosis IS6110 transposase subunits e.g. Q50686|YIA4\_MYCTU Insertion element IS6110 hypothetical 12.0 kDa protein (108 aa), fasta scores: E(): 1.4e-43,(100.00% identity in 108 aa overlap). The transposase described here may be made by a frame shifting mechanism during translation that fuses Rv1756c and Rv1757c, the sequence UUUUAAAG (directly upstream of Rv1756c) maybe responsible for such a frameshifting event (see McAdam et al., 1990)."  
/codon\_start=1  
/transl\_table=11  
/product="Putative transposase for insertion sequence element IS6110 (fragment)"  
/protein\_id="NP\_216273.1"  
/db\_xref="GI:15608895 GeneID:885558"  
/translation="MSGGSSRRYPPELRRERAVRMVAEIRGQHDSEWAAISEVARLLGVGCAETVRKWRQAQVDAGARPGTTTEE  
SAELKRLRRDNAELRRANAILKTASAFFAAELDRPAR"  
1871428..1871754

CDS /locus\_tag="Rv1763"  
/note="Rv1763, (MTCY28.29), len: 108 aa. Putative Transposase for IS6110 (fragment), identical to many other Mycobacterium tuberculosis IS6110 transposase subunits e.g. Q50686|YIA4\_MYCTU Insertion element IS6110 hypothetical 12.0 kDa protein (108 aa), fasta scores: E(): 1.4e-43,(100.00% identity in 108 aa overlap). The transposase described here may be made by a frame shifting mechanism during translation that fuses Rv1763 and Rv1764, the sequence UUUUAAAG (directly upstream of Rv1764) maybe responsible for such a frameshifting event (see McAdam et al., 1990)."  
/codon\_start=1  
/transl\_table=11  
/product="Putative transposase for insertion sequence element IS6110 (fragment)"  
/protein\_id="NP\_216279.1"  
/db\_xref="GI:15608901 GeneID:885372"  
/translation="MSGGSSRRYPPELRRERAVRMVAEIRGQHDSEWAAISEVARLLGVGCAETVRKWRQAQVDAGARPGTTTEE  
SAELKRLRRDNAELRRANAILKTASAFFAAELDRPAR"  
1871703..1872689

CDS /locus\_tag="Rv1764"  
/note="Rv1764, (MTCY28.30), len: 328 aa. Putative Transposase for IS6110 insertion element. Identical to many other M. tuberculosis IS6110 transposase subunits. The transposase described here may be made by a frame shifting mechanism during translation that fuses Rv1763 and Rv1764,the sequence UUUUAAAG (directly upstream of Rv1764) maybe responsible for such a frameshifting event (see McAdam et al., 1990). Start changed since first submission (+ 34 aa)"  
/codon\_start=1  
/transl\_table=11  
/product="Putative transposase"  
/protein\_id="NP\_216280.2"  
/db\_xref="GI:448824764 GeneID:885238"  
/translation="KDRVGFLLRGRARPASTLITRFIADHQHREGPDGLRWGVESICTQLTELGVPIAPSTYYDHINREPSRREL  
RDGELKEHISRVAANYGVYGARKVWLTNLNREGIEVARCTVERLMTKLGLSGTTRGKARRTTIADPATARPADLVQRRFGPPAPN  
RLWVADLTYVSTWAGFAYVAFVTDAYARRILGWRVASTMATSMVLDAIEQAIWTRQQEGVLDLKDVIHHTDRGSQYTSIRFSERL  
AEAGIQPSVGAVGSSYDNALAEATINGLYKTELIKPGKPWRSIEDVELATARWVDFNHRRLYQYCGDVPVVELEAAYYAQRQRP  
AG"  
1874418..1874633

CDS /locus\_tag="Rv1765A"  
/note="Rv1765A, len: 71 aa. Putative transposase (fragment), similar to part of many transposase genes including IS6110 e.g. P19774|TRA9\_MYCTU putative transposase from Mycobacterium tuberculosis (278 aa), FASTA scores: opt: 231, E(): 4.7e-11, (45.35% identity in 75 aa overlap)."  
/codon\_start=1  
/transl\_table=11  
/product="Putative transposase (fragment)"  
/protein\_id="YP\_177652.1"  
/db\_xref="GI:57116906 GeneID:3205098"  
/translation="MWVADITFVRTWQGFQCYTAFVTDVCTRKIVVWAVSATMRTEDLPVQVFNHVAWQSNSDLSELVHSDPGSQ"  
2107396..2107875

CDS /locus\_tag="Rv2013"  
/note="Rv2013, (MTCY39.04c), len: 159 aa. Transposase,shows similarity to N-terminal part of transposase and insertion element hypothetical proteins. Length changed since first submission (no clear start apparent)."  
/codon\_start=1

/transl\_table=11  
 /product="Transposase"  
 /protein\_id="NP\_216529.2"  
 /db\_xref="GI:57116936 GeneID:887546"  
 /translation="MDTLLEAGITVVVISPNQLKNLRGRYGSAGNKDDRFDAFVLADTLRTDRSRLRPLLDPATATLRRTCRP  
 RKDLVAHRVALANQLRAHLRNVFPGVVGLFADLDSPLSLAFLTLFLPRFDCQDRADWLSVKRLAGWLAAGYCGRAPRPAHRCPAR  
 RHR"  
 CDS 2107829..2108419  
 /locus\_tag="Rv2014"  
 /note="Rv2014, (MTCY39.03c), len: 196 aa. Transposase, similar to insertion elements;  
 possibly made by frameshifting with respect to Rv2013. Length changed since first  
 submission."  
 /codon\_start=1  
 /transl\_table=11  
 /product="Transposase"  
 /protein\_id="NP\_216530.2"  
 /db\_xref="GI:57116937 GeneID:887547"  
 /translation="MLHDRLTGAPRGATGDEGAANAHI TRAMVAALTSVATQIKTLDAQIAEQLSLHADAHIFTSLPRSGTVRAA  
 RLLAEIGDCRARFPTPESLACLAGVAPSTRQSGKVKHVGFRAWADKQLRDAVCDFAGDSRRANLWAADRYNRAIARGHDHPHAVR  
 IILARAWLYAIWHCWQDGAAYHPANHRALQALLNQDQDRAA"  
 CDS 2189758..2190063  
 /locus\_tag="Rv2085"  
 /note="Rv2085, (MTCY49.24), len: 101 aa. Conserved hypothetical protein, similar to  
 but shorter than many transposases but we can find no sequence errors to account for  
 the frameshifts. Contains possible helix-turn-helix motif at aa 33 to 54,(+3.11 SD).  
 This region is a possible MT-complex-specific genomic island (See Becq et al.,2007)."  
 /codon\_start=1  
 /transl\_table=11  
 /product="hypothetical protein"  
 /protein\_id="NP\_216601.1"  
 /db\_xref="GI:15609222 GeneID:888138"  
 /translation="MSDMCDVVSFVGAERVLRARFRPSPESGPPVHARRCGWSLGISAETLRRWAGQAEVDSGVVAGVSASRS  
 SVKTSELEQTIEILKVATSEFFARKCDPRHR"  
 CDS 2210718..2211044  
 /locus\_tag="Rv2105"  
 /note="Rv2105, (MTCY261.01), len: 108 aa. Putative transposase for IS6110 (fragment),  
 identical to many other Mycobacterium tuberculosis IS6110 transposase subunits e.g.  
 Q50686|YIA4\_MYCTU Insertion element IS6110 hypothetical 12.0 kDa protein (108 aa),  
 fasta scores: E(): 1.4e-43,(100.00% identity in 108 aa overlap). The transposase  
 described here may be made by a frame shifting mechanism during translation that  
 fuses Rv2105 and Rv2106, the sequence UUUUAAAG (directly upstream of Rv2106) maybe  
 responsible for such a frameshifting event (see McAdam et al., 1990)."  
 /codon\_start=1  
 /transl\_table=11  
 /product="Putative transposase for insertion sequence element IS6110 (fragment)"  
 /protein\_id="NP\_216621.1"  
 /db\_xref="GI:15609242 GeneID:888395"  
 /translation="MSGGSSRRYPPELRERAVRMVAEIRGQHDSEWAAISEVARLLGVGCAETVRKWRQAQVDAGARPGTTTEE  
 SAELKRLRRDNAELRRANAILKTASAFFAAELDRPAR"  
 CDS 2210993..2211979  
 /locus\_tag="Rv2106"  
 /note="Rv2106, (MTCY261.02), len: 328 aa. Probable transposase subunit for IS6110.  
 Identical to many other M. tuberculosis IS6110 transposase subunits. The transposase  
 described here may be made by a frame shifting mechanism during translation that  
 fuses Rv2105 and Rv2106, the sequence UUUUAAAG (directly upstream of Rv2106) maybe  
 responsible for such a frameshifting event (see McAdam et al., 1990). Start changed  
 since first submission (+ 16 aa)."  
 /codon\_start=1  
 /transl\_table=11  
 /product="Probable transposase"  
 /protein\_id="NP\_216622.2"  
 /db\_xref="GI:448824775 GeneID:888398"  
 /translation="KDRVGFLLRGRARPASTLITRFIADHQGHREGPDGLRWGVESICTQLTELGVPIAPSTYYDHINREPSRREL  
 RDGELKEHISRVAANYGVYGAARKVWLTNLNREGIEVARCTVERLMTKLGSLGTTTRGKARRTTIADPATARPADLVQRRFGPPAPN  
 RLWVADLTYVSTWAGFAYVAFVTDAYARRILGWRVASTMATSMVLDAIEQAIWTRQQEGVLDLKDVIHHTDRGSQYTSIRFSERL  
 AEAGIQPSVAVGSSYDNALAEETINGLYKTELIKPGKPWRSIEDVELATARWVDWVFNHRRLYQYCGDVPVVELEAAYYAQRQRP  
 AG"  
 CDS complement(2270591..2271577)  
 /locus\_tag="Rv2167c"



/note="Rv2167c, (MTCY270.01), len: 328 aa. Probable IS6110 transposase. Identical to many other M. tuberculosis IS6110 transposase subunits. The transposase described here may be made by a frame shifting mechanism during translation that fuses Rv2167c and Rv2168c, the sequence UUUUAAAG (directly upstream of Rv2167c) maybe responsible for such a frameshifting event (see McAdam et al., 1990). Start changed since first submission (- 18 aa)."  
 /codon\_start=1  
 /transl\_table=11  
 /product="Probable transposase"  
 /protein\_id="NP\_216683.2"  
 /db\_xref="GI:448824778 GeneID:888197"  
 /translation="KDRVGFRLRGRARPASTLITRFIADHQHREGPDGLRWGVESICTQLTELGVPIAPSTYYDHNREPSRREL  
 RDGELKEHISRVAANYGVYGARKVWLTNLNREGIEVARCTVERLMTKLGLSGTTRGKARRTTIADPATARPADLVQRRFGPPAPN  
 RLWVADLTYVSTWAGFAYVAFVTDAYARRILGWRVASTMATSMVLDAIEQAIWTRQQEGVLDLKDVIHHTDRGSQYTSIRFSERL  
 AEAGIQPSVGAVGSSYDNALAEATINGLYKTELKPKGKPWRSIEDVELATARWVDWVFNHRRLYQYCGDVPVPELEAAYYAQRQRP  
 AG"

CDS  
 complement(2271526..2271852)  
 /locus\_tag="Rv2168c"  
 /note="Rv2168c, (MTV021.01c), len: 108 aa. Putative transposase for IS6110 (fragment), identical to many other Mycobacterium tuberculosis IS6110 transposase subunits e.g. Q50686|YIA4\_MYCTU Insertion element IS6110 hypothetical 12.0 kDa protein (108 aa), fasta scores: E(): 1.4e-43,(100.00% identity in 108 aa overlap). The transposase described here may be made by a frame shifting mechanism during translation that fuses Rv2167c and Rv2168c, the sequence UUUUAAAG (directly upstream of Rv2167c) maybe responsible for such a frameshifting event (see McAdam et al., 1990)."  
 /codon\_start=1  
 /transl\_table=11  
 /product="Putative transposase for insertion sequence element IS6110 (fragment)"  
 /protein\_id="NP\_216684.1"  
 /db\_xref="GI:15609305 GeneID:888459"  
 /translation="MSGGSSRRYPPELRERAVRMVAEIRGQHDSEWAAISEVARLLGVGCAETVRKWRQAQVDAGARPGTTTEE  
 SAELKRLRRDNAELRRANAILKTASAFFAAELDRPAR"

CDS  
 complement(2279714..2280379)  
 /locus\_tag="Rv2177c"  
 /note="Rv2177c, (MTV021.10c), len: 221 aa. Possible IS1558 transposase (see citation below), similar to several is element proteins and transposases but nearly identical to last 221 residues of MTCY428\_23 (333 aa). FASTA scores: Z81451|MTCY428\_23 Mycobacterium tuberculosis cosmid (333 aa) opt: 1491, E() : 0; 98.6% identity in 221 aa overlap."  
 /codon\_start=1  
 /transl\_table=11  
 /product="Possible transposase"  
 /protein\_id="NP\_216693.1"  
 /db\_xref="GI:15609314 GeneID:888326"  
 /translation="MRSKIPDLQRALEGRFDDHMHALMCRLLHLAHLDDLQDAMIGALDEQIEQLMHPFCARRELIASIPGIGVGASA  
 TVISEIGADPAAWFPSAEHLASWVRLCPGNHESAGKRHHGARRTGNQHLQPVLVECAWAAVRTDGYLREYRQRVRFKGGFRSPA  
 ANKKAIIAIAVAKLIVIIWHLVATGRPYQDLGADYFTTRMPDPKERRRLVAKLEAQQGLGVTLPEAA"

CDS  
 2390497..2390823  
 /locus\_tag="Rv2278"  
 /note="Rv2278, (MTCY339.32c), len: 108 aa. Putative Transposase for IS6110 (fragment). Identical to many other M. tuberculosis IS6110 transposase subunits. The transposase described here may be made by a frame shifting mechanism during translation that fuses Rv2278 and Rv2279, the sequence UUUUAAAG (directly upstream of Rv2279) maybe responsible for such a frameshifting event (see McAdam et al., 1990)."  
 /codon\_start=1  
 /transl\_table=11  
 /product="Putative transposase for insertion sequence element IS6110 (fragment)"  
 /protein\_id="NP\_216794.1"  
 /db\_xref="GI:15609415 GeneID:888602"  
 /translation="MSGGSSRRYPPELRERAVRMVAEIRGQHDSEWAAISEVARLLGVGCAETVRKWRQAQVDAGARPGTTTEE  
 SAELKRLRRDNAELRRANAILKTASAFFAAELDRPAR"

CDS  
 2390772..2391758  
 /locus\_tag="Rv2279"  
 /note="Rv2279, (MTCY339.31c), len: 328 aa. Probable IS6110 transposase. Identical to many other M. tuberculosis IS6110 transposase subunits. The transposase described here may be made by a frame shifting mechanism during translation that fuses Rv2278 and Rv2279, the sequence UUUUAAAG (directly upstream of Rv2279) maybe responsible for such a frameshifting event (see McAdam et al., 1990). Start changed since first

submission (+ 16 aa)."  
 /codon\_start=1  
 /transl\_table=11  
 /product="Probable transposase"  
 /protein\_id="NP\_216795.2"  
 /db\_xref="GI:448824782 GeneID:887746"  
 /translation="KDRVGFLLRGRARPASTLITRFIADHQGHREGPDGLRWGVESICTQLTELGVPIAPSTYYDHNREPSRREL  
 RDGELKEHISRVAANYGVYGARKVWLTNLNREGIEVARCTVERLMTKLGLSGTTRGKARRTTIADPATARPADLVQRRFGPPAPN  
 RLWVADLTYVSTWAGFAYVAFVTDAYARRILGWRVASTMATSMVLDAIEQAIWTRQQEGVLDLKDVIHHTDRGSQYTSIRFSERL  
 AEAGIQPSVAVGSSYDNALAETINGLYKTELIKPGKPWRSIEDVELATARWVDWDFNHRRLYQYCGDVPVPELEAAYYAQRQRPA  
 AG"

CDS 2471428..2471754  
 /locus\_tag="Rv2354"  
 /note="Rv2354, (MTCY98.23), len: 108 aa. Putative Transposase for IS6110 (fragment). Identical to many other M. tuberculosis IS6110 transposase subunits. The transposase described here may be made by a frame shifting mechanism during translation that fuses Rv2354 and Rv2355, the sequence UUUUAAAG (directly upstream of Rv2355) maybe responsible for such a frameshifting event (see McAdam et al., 1990)."  
 /codon\_start=1  
 /transl\_table=11  
 /product="Probable transposase for insertion sequence element IS6110 (fragment)"  
 /protein\_id="NP\_216870.1"  
 /db\_xref="GI:15609491 GeneID:888963"  
 /translation="MSGGSSRRYPPELREAVRMVAEIRGQHDSEWAAISEVARLLGVGCAETVRKWRQAQVDAGARPGTTTEE  
 SAELKRLRRDNAELRRANAILKTASAFFAAELDRPAR"

CDS 2471703..2472689  
 /locus\_tag="Rv2355"  
 /note="Rv2355, (MTCY98.24), len: 328 aa. Probable IS6110 transposase. Identical to many other M. tuberculosis IS6110 transposase subunits. The transposase described here may be made by a frame shifting mechanism during translation that fuses Rv2354 and Rv2355, the sequence UUUUAAAG (directly upstream of Rv2355) maybe responsible for such a frameshifting event (see McAdam et al., 1990). Start changed since first submission (+ 16 aa)."  
 /codon\_start=1  
 /transl\_table=11  
 /product="Probable transposase"  
 /protein\_id="NP\_216871.2"  
 /db\_xref="GI:448824783 GeneID:888957"  
 /translation="KDRVGFLLRGRARPASTLITRFIADHQGHREGPDGLRWGVESICTQLTELGVPIAPSTYYDHNREPSRREL  
 RDGELKEHISRVAANYGVYGARKVWLTNLNREGIEVARCTVERLMTKLGLSGTTRGKARRTTIADPATARPADLVQRRFGPPAPN  
 RLWVADLTYVSTWAGFAYVAFVTDAYARRILGWRVASTMATSMVLDAIEQAIWTRQQEGVLDLKDVIHHTDRGSQYTSIRFSERL  
 AEAGIQPSVAVGSSYDNALAETINGLYKTELIKPGKPWRSIEDVELATARWVDWDFNHRRLYQYCGDVPVPELEAAYYAQRQRPA  
 AG"

CDS complement(2552736..2553737)  
 /locus\_tag="Rv2424c"  
 /inference="protein motif:PROSITE:PS01159"  
 /note="Rv2424c, (MTCY428.23), len: 333 aa. Probable transposase for IS1558, similar to is element proteins e.g. AL021957|Rv2177c|MTV021\_10 from Mycobacterium tuberculosis (221 aa), FASTA scores: opt: 1491, E(): 6.2e-87, (98.6% identity in 221 aa overlap); P19780|YIS1\_STRCO hypothetical insertion element IS110 from Streptomyces coelicolor (45 aa), FASTA scores: opt: 203, E(): 1.7e-05; (27.3% identity in 238 aa overlap); etc. Contains PS01159 WW/rsp5/WWP domain signature."  
 /codon\_start=1  
 /transl\_table=11  
 /product="Probable transposase"  
 /protein\_id="NP\_216940.1"  
 /db\_xref="GI:15609561 GeneID:885699"  
 /translation="MQCRAREERPGRKTDLLDAEWLVHLLLECGLLRGWLI PPADIKAAARDVIRYRRKLV EHR TSKLQRLGNVLQD  
 AGIKADSVASSVTPKSVRAMVEALIDGERRPAVLADLARGSMRSKIPDLQRALEGRFDDHMHMCRHLHLAHLQDLAMIGALDEQ  
 IEQLMHPFCARRELIASIPGIGVGASATVISEIGADPAAWFPPSAEHLASWVRLCPGNHESAGKRHHGARRTGNQHLQPVLECAW  
 AAVRTDGYLREYYRRQVRKFGGFRSPAANKKAITTVAHKLIVIIWHVLATGRPHQDLGADYFTTRMDPKERRRLVAKLEAQQGLG  
 VTLEPAA"

CDS complement(2615732..2616718)  
 /locus\_tag="Rv2479c"  
 /note="Rv2479c, (MTV008.35c), len: 328 aa. Probable transposase for IS6110. Identical to many other M. tuberculosis IS6110 transposase subunits. The transposase described here may be made by a frame shifting mechanism during translation that fuses Rv2480c and Rv2479c, the sequence UUUUAAAG (directly upstream of Rv2479c) maybe responsible for such a frameshifting event (see McAdam et al., 1990). Start changed since first

```

submission (- 18 aa)."
/codon_start=1
/transl_table=11
/product="Probable transposase"
/protein_id="NP_216995.2"
/db_xref="GI:448824787 GeneID:887201"
/translation="KDRVGFLLRGRARPASTLITRFIADHQHREGPDGLRWGVESICTQLTELGVPIAPSTYYDHINREPSRREL
RDGELKEHISRVAANYGVYGARKVWLTNLNREGIEVARCTVERLMTKLGSLGTTTRGKARRTTIADPATARPADLVQRRFGPPAPN
RLWVADLTYVSTWAGFAYVAFVTDAYARRILGWRVASTMATSMVLDAIEQAIWTRQQEGVLDLKDVIHHTDRGSQYTSIRFSERL
AEAGIQPSVAVGSSYDNALAEATINGLYKTELKPGKPWRSIEDVELATARWVDWVFNHRRLYQYCGDVPPVELEAAYYAQRQRP
AG"
CDS complement(2616667..2616993)
/locus_tag="Rv2480c"
/note="Rv2480c, (MTV008.36c), len: 108 aa. Putative Transposase for IS6110
(fragment). Identical to many other M. tuberculosis IS6110 transposase subunits. The
transposase described here may be made by a frame shifting mechanism during
translation that fuses Rv2480c and Rv2479c, the sequence UUUUAAAG (directly upstream
of Rv2479c) maybe responsible for such a frameshifting event (see McAdam et al.,
1990)."
```

```

/codon_start=1
/transl_table=11
/product="Possible transposase for insertion sequence element IS6110 (fragment)"
/protein_id="NP_216996.1"
/db_xref="GI:15609617 GeneID:887328"
/translation="MSGGSSRRYPPELRERAVRMVAEIRGQHDSEWAAISEVARLLGVGCAETVRKQVDAQVDPDAGARPGTTTEE
SAELKRLRRDNAELRRANAILKTASAFFFAELDRPAR"
CDS complement(2652563..2653810)
/locus_tag="Rv2512c"
/inference="protein motif:PROSITE:PS00435 protein motif:PROSITE:PS01007"
/note="Rv2512c, (MTCY07A7.18c), len: 415 aa. Transposase for IS1081, identical to
P35882|TRAI_MYCBO transposase for insertion sequence element IS1081 from
Mycobacterium bovis (415 aa), FASTA scores: opt: 2680, E(): 1.9e-162, (100.0%
identity in 415 aa overlap). Also highly similar to others from Mycobacterium
tuberculosis e.g. P96354|Rv1047|MTCY10G2.02c|Rv3115|MTCY164.25|Rv3023c|MTV01 2.38c
(415 aa), FASTA scores: opt: 2675, E(): 3.9e-162, (99.75% identity in 415 aa
overlap). Contains PS00435 Peroxidases proximal heme-ligand signature, PS01007
Transposases,Mutator family, signature. Belongs to the mutator family of transposase."
```

```

/codon_start=1
/transl_table=11
/product="Transposase for insertion sequence element IS1081"
/protein_id="NP_217028.1"
/db_xref="GI:15609649 GeneID:888515"
/translation="MTSSHLIDTEQLLADQLAQASPDLLRGLLSTFIAALMGAEADALCGAGYRERSDERSNQNRNGYRHRDFDTR
AATIDVAIPKLRQGSYFPDWLLQRRKRAERALTSVVATCYLLGVSTRRMRVETLGVTKLSKQVSIMAKELDEAVEAFRTRPL
DAGPYTFLAADALVVKVREAGRUVGVHTLIATGVNAEGYREILGIQVTS AEDGAGWLAFFRDLVARGLSGVALVTS DAHAGLVAA
IGATLPAAAWQRCRTHYAANLMAATPKPSWPVVRTLLHSIYDQPDAESVVAQYDRVLDALTDKLPVAEHLDTARTDLLAFTAFP
KQIWRQIWSNNPQERLNRREVRRTDVGIFPDRASIIRLVGAVALAEQHDIEWIEGRRYLGLEVLTRARAALTSTEEPAKQQTNTPT
ALTT"
CDS 2787590..2787916
/locus_tag="Rv2648"
/note="Rv2648, (MTCY441.17A), len: 108 aa. Putative Transposase for IS6110
(fragment). Identical to many other M. tuberculosis IS6110 transposase subunits. The
transposase described here may be made by a frame shifting mechanism during
translation that fuses Rv2648 and Rv2649,the sequence UUUUAAAG (directly upstream of
Rv2649) maybe responsible for such a frameshifting event (see McAdam et al., 1990)."
```

```

/codon_start=1
/transl_table=11
/product="Probable transposase for insertion sequence element IS6110 (fragment)"
/protein_id="NP_217164.1"
/db_xref="GI:15609785 GeneID:887828"
/translation="MSGGSSRRYPPELRERAVRMVAEIRGQHDSEWAAISEVARLLGVGCAETVRKQVDAQVDPDAGARPGTTTEE
SAELKRLRRDNAELRRANAILKTASAFFFAELDRPAR"
CDS 2787865..2788851
/locus_tag="Rv2649"
/note="Rv2649, (MTCY441.18), len: 328 aa. Probable transposase for IS6110. Identical
to many other M. tuberculosis IS6110 transposase subunits. The transposase described
here may be made by a frame shifting mechanism during translation that fuses Rv2648
and Rv2649, the sequence UUUUAAAG (directly upstream of Rv2649) maybe responsible for
such a frameshifting event (see McAdam et al., 1990)."
```

/codon\_start=1  
/transl\_table=11  
/product="Probable transposase for insertion sequence element IS6110"  
/protein\_id="NP\_217165.1"  
/db\_xref="GI:15609786 GeneID:888553"  
/translation="KDRVGFLLRGRARPASTLITRFIADHQHREGPDGLRWGVESICTQLTELGVPIAPSTYYDHNREPSRREL  
RDGELKEHISRVAANYGVYGARKVWLTNLNREGIEVARCTVERLMTKLGSLGTTTRGKARRTTIADPATARPADLVQRRFGPPAPN  
RLWVADLTYVSTWAGFAYVAFVTDAYARRILGWRVASTMATSMVLDAIEQAIWTRQOEGVLDLKDVIHHTDRGSQYTSIRFSERL  
AEAGIQPSVAVGSSYDNALAEATINGLYKTELIKPGKPWRSIEDVELATARWVDWVFNHRRLYQYCGDVPVVELEAAYYAQRQRP  
AG"  
CDS 2798501..2799304  
/locus\_tag="Rv2666"  
/inference="protein motif:PROSITE:PS01007"  
/note="Rv2666, (MTCY441.35), len: 267 aa. Probable transposase (fragment), identical  
in region of overlap to P35882|TRAI\_MYCBO|TRAI\_MYCTU transposase for insertion  
sequence element IS1081 from Mycobacterium tuberculosis or bovis (415 aa). Last 4  
codons not part of gene. Contains PS01007 Transposases, Mutator family, signature."  
/codon\_start=1  
/transl\_table=11  
/product="Probable transposase for insertion sequence element IS1081 (fragment)"  
/protein\_id="NP\_217182.1"  
/db\_xref="GI:15609803 GeneID:888904"  
/translation="MTSSHLIDTEQLLADQLAQASPDLLRGLLSTFIAALMGAEADALCGAGYRERSDERSNQFNQNGYRHRDFDTR  
AATIDVAIPKLRQGSYFPDWLLQRRKRAERALTSVATCYLLGVSTRRMERLVEITLGVTKLSKSQVSIKAKELDEAVEAFRTRPL  
DAGPYTFLAADALVLKREAGRVVGVHTLIATGVNAEGYREILGIQVTS AEDGAGWLAFFRDLVARGLSGVALVTS DAHAGLVAA  
IGATLPAAAWQRCRTHYAANHGRHNA"  
CDS complement(2910892..2912271)  
/locus\_tag="Rv2791c"  
/experiment="EXISTENCE: identified in proteomics study"  
/note="Rv2791c, (MTV002.56c), len: 459 aa. Probable IS1602 transposase for IS1602  
element, similar to many e.g. P95117|Rv2978c|MTCY349.09 from Mycobacterium  
tuberculosis (459 aa), FASTA scores: opt: 2718, E(): 6.3e-165, (86.05% identity in  
459 aa overlap)."  
/codon\_start=1  
/transl\_table=11  
/product="Probable transposase"  
/protein\_id="NP\_217307.1"  
/db\_xref="GI:15609928 GeneID:888281"  
/translation="MAKFEIPEGWVQAFRFTLDPTAEQARALARHFGARRKAYNWTVATLKADIDAWQATGIQTAKPSLRVLRK  
RWNTVKNDVVCVNIETGVVWVPECSKEAYADGIDGAVDAYWNWQNSRSGKRDGKRMGFPRFKKKGRDPDRVTFTTGAMRVEPDRRH  
LTLPIVIGTVRTHENTRRVERLIAKGRSRVLAITVRRNGTRIDASVRVLVQRPQPKVTDPGSRVGVVGVRRLATVATADGAVLE  
RVPNPRPLDAALNELRHVCRARSRCTKGSRRYRERTTEISRLHRRVNDVTRTHHLHCLTTHLAKTHGRIVVEGLDAAGMLRQOGLS  
GARARRRGLSDAALGTPRRHLSYKTGWYGSQLVVADRWFPSKKTCHVCVGHVQEIGWAEHWQCDCSCSASHQRDDCAAINLARYEDT  
SSVVGVPVGAAVKRGADRKTRPGRAGGREARKGSSRKAEEQPRDGVQVA"  
CDS complement(2926431..2926832)  
/locus\_tag="Rv2810c"  
/note="Rv2810c, (MTCY16B7.33), len: 133 aa. Probable transposase for IS1555, similar  
to C-terminal domain of transposases for defective IS1555 e.g. Q9LCS0|TNPA  
transposase from Arthrobacter sp. TM1 (435 aa), FASTA scores: opt: 294, E(): 1.8e-13,  
(55.1% identity in 98 aa overlap); Q50440|TNPA insertion element TNPR and TNPA gene  
from Mycobacterium smegmatis (413 aa), FASTA scores: opt: 274, E(): 4.7e-12, (56.25%  
identity in 96 aa overlap); etc. This region is a possible MT-complex-specific  
genomic island (See Becq et al., 2007)."  
/codon\_start=1  
/transl\_table=11  
/product="Probable transposase"  
/protein\_id="NP\_217326.1"  
/db\_xref="GI:15609947 GeneID:887784"  
/translation="PLRLQAHTGGPPVALRQETTGGPSPTNDLITEPPRHYKQQTRVVRQAPALLTVSAGTGVVLEELAKLGR  
LWRCRHDVLAIFYFDHHSNGPTEAINGRLEALCRNALGFRNLTHYRIRSLHLCGNLAQLIHAL"  
CDS 2927508..2928917  
/locus\_tag="Rv2812"  
/experiment="EXISTENCE: identified in proteomics study"  
/note="Rv2812, (MTCY16B7.31c), len: 469 aa. Probable transposase for IS1604, similar  
to putative transposases and hypothetical proteins e.g. Q9EZM2|putative transposase  
from Mycobacterium paratuberculosis (395 aa), FASTA scores: opt: 329, E(): 3e-13,  
(27.05% identity in 362 aa overlap); CAC46499 putative transposase protein from  
Rhizobium meliloti (Sinorhizobium meliloti) (390 aa), FASTA scores: opt: 327, E():  
3.9e-13, (30.5% identity in 367 aa overlap); etc. Contains possible helix-turn-helix

motif at aa 50-71 (Score 1140, +3.07 SD). This region is a possible MT-complex-specific genomic island (See Becq et al., 2007)."

/codon\_start=1  
/transl\_table=11  
/product="Probable transposase"  
/protein\_id="NP\_217328.1"  
/db\_xref="GI:15609949 GeneID:888942"  
/translation="MAVGDEEEKVRAERARAIGLFRYQLIWEAADAHSTKQRGKRVRELASREHTDPFGRVRISRQTIDRWIR  
GWRAGGFDALVPNPRQCTPRTPAEVLELAVALRRENPORTAAAIRRILRTQLGWAPDERTLQRNFHRLGLTGATTGSAPAVFGRF  
EAEHPNALWTGDVHLGIRIDLKTYLFAFLDDHSRLVPGYRWGHAEDTVRLAAALRPALASRGVNAVYVDNGSPYVDALLLRAC  
AKLGVRLVHSTPGRPQGRGKIERFFRTVREQLVEITGEPDVGGRHYVADLAELNRLFTAWVETVYHRSVHSETGQTPLARWSAG  
GPIPLPAPETLTEAFLWEEHRRVTKTATVSLHGNYEIDPALVGRKVELVDFDPLTRIEVRLAGAPMRRRAIPYHIGRHSHPKAK  
PETPTAPPKPSGIDYAQLIETAHAAELARGVNYTALTGAADQIPGQLDLLTGQEAQPK"

CDS

complement(2931256..2932242)  
/locus\_tag="Rv2814c"  
/note="Rv2814c, (MTCY16B7.29), len: 328 aa. Probable transposase subunit for IS6110. Identical to many other M. tuberculosis IS6110 transposase subunits. The transposase described here may be made by a frame shifting mechanism during translation that fuses Rv2814c and Rv2815c, the sequence UUUUAAAG (directly upstream of Rv2814c) maybe responsible for such a frameshifting event (see McAdam et al., 1990). Start changed since first submission (+ 16 aa). This region is a possible MT-complex-specific genomic island (See Becq et al., 2007)."

/codon\_start=1  
/transl\_table=11  
/product="Probable transposase"  
/protein\_id="NP\_217330.2"  
/db\_xref="GI:448824791 GeneID:887839"  
/translation="KDRVGFLLRGRARPASTLITRFIADHQHREGPDGLRWGVESICTQLTELGVPIAPSTYYDHINREPSRREL  
RDGELKEHISRVAANYGVYGARVWLTNLNREGIEVARCTVERLMTKLGSLGTTTRGKARRTTIADPATARPADLVQRRFGPPAPN  
RLWVADLTYVSTWAGFAYVAFVTDAYARRILGWRVASTMATSMVLDAIEQAIWTRQQEGVLDLKDVIHHTDRGSQYTSIRFSERL  
AEAGIQPSVGAVGSSYDNALAEETINGLYKTELIKPGKPWRSIEDVELATARWVDWVFNHRRLYQYCGDVPVPELEAAYYAQRQRP  
AG"

CDS

complement(2932191..2932517)  
/locus\_tag="Rv2815c"  
/note="Rv2815c, (MTCY16B7.28), len: 108 aa. Putative Transposase for IS6110 (fragment). Identical to many other M. tuberculosis IS6110 transposase subunits. The transposase described here may be made by a frame shifting mechanism during translation that fuses Rv2814c and Rv2815c, the sequence UUUUAAAG (directly upstream of Rv2814c) maybe responsible for such a frameshifting event (see McAdam et al., 1990). This region is a possible MT-complex-specific genomic island (See Becq et al., 2007)."

/codon\_start=1  
/transl\_table=11  
/product="Probable transposase"  
/protein\_id="NP\_217331.1"  
/db\_xref="GI:15609952 GeneID:888511"  
/translation="MSGGSSRRYPPELRERAVRMVAEIRGQHDSEWAAISEVARLLGVGCAETVRKQVQVDAGARPGTTTEE  
SAELKRLRRDNAELRRANAILKTASAFFAAELDRPAR"

CDS

complement(3003008..3004390)  
/locus\_tag="Rv2885c"  
/experiment="EXISTENCE: identified in proteomics study"  
/inference="protein motif:PROSITE:PS00017"  
/note="Rv2885c, (MTCY274.16c), len: 460 aa. Probable transposase for IS1539. Contains PS00017 ATP/GTP-binding site motif A (P-loop)."

/codon\_start=1  
/transl\_table=11  
/product="Probable transposase"  
/protein\_id="NP\_217401.1"  
/db\_xref="GI:15610022 GeneID:887173"  
/translation="MMARLKVPEGWCVQAFRFTLNPTQTQAASLARHFAGARRKAFNWTVTALKADIKAWRADGTESAKPSLRVLR  
KRWNTVKDQVCVNAQTGQVWVPECSKEAYADGIAGAVDAYWVWQSCRAGKRAGKTVGVPRFKKKGRDADRVCFTTGAMRVEPDRR  
HLTLVPIGTIRTYENTRRVERLIAKGRARVLAITVRNRGTRLDASVRVLVQRPQRRVALPDSRVGVVDVGRRLATVADAEGTVL  
EQVNPRLPLDAALRGLRRVSRARSRCKTGSRRYCERTTELSRLHRRVNDVTRTHHLHVLTTTLAKTHGRIVVEGLDAAGMLRQKGL  
PGARARRRALSDAALATPRRHLSYKTGWYGSLLVADRWFPSKTCACRHHVQDQIGWDEKQCDGCSIITHQRDDNAAINLARYEE  
PPSVVGPVGAAVKRGADRKTGPGPAGGREARKATGHPAGEQPRDGVQVK"

CDS

3096079..3097320  
/locus\_tag="Rv2943"  
/note="Rv2943, (MTCY24G1.06c), len: 413 aa. Probable transposase for insertion sequence IS1533, similar to other transposases e.g. P15025|ISTA\_ECOLI ista protein

(insertion sequence IS21) from *Escherichia coli* (390 aa), FASTA scores: opt: 268, E(): 5.1e-11, (24.1% identity in 378 aa overlap). Contains potential helix-turn-helix motif at aa 19-40 (Score 1611, +4.67 SD)."

/codon\_start=1  
/transl\_table=11  
/product="Probable transposase for insertion sequence element IS1533"  
/protein\_id="NP\_217459.1"  
/db\_xref="GI:15610080 GeneID:887834"  
/translation="MLTVEDWAEIRRLHRAEGLPIKMIARVLGISKNTVKSALSNQPKYERAPQGSIVDAVEPRIRELLQAYP  
TMPATVIAERIGWERSIRVLSARVAELRPVYLPPDPASRTTYVAGEIAQCDFWFPIELPVGFGQTRTAKQLPVLTMVCAYSRWL  
LAMLPLSRCAEDLFAGWWRLIEALGAVPRVLVWDGEGAIGRWGRGSRSELTTECQAFRGTAAKVLICRPADPEAKGLIERAHDYL  
ERSFLPGRVVFASPADFNAQLGAWLALVNTRRRALGCAPTDRIGADRAAMLSLPPVAPATGWCTSLRSLPRDHYVRCDSNDYSVHP  
GVIGHRVLVRADLERVHVFCGDELVADHERIWAHVHQTVSDPAHVEAAKVLRRRHFSAAASPVEPQVQVRSLSLDYDDALGVDIDGG  
VA"

CDS 3097320..3097850  
/locus\_tag="Rv2943A"  
/note="Rv2943A, len: 176 aa. Possible transposase, similar to many e.g. AJ238712|MBO238712\_2 putative transposase (IS21-1) from *Mycobacterium bovis* BCG (266 aa), FASTA scores: opt: 762, E(): 0, (100.0% identity in 118 aa overlap). Possible frameshift after codon 118 i.e. near position 3290056, to fuse with Rv2944."  
/codon\_start=1  
/transl\_table=11  
/product="Possible transposase"  
/protein\_id="YP\_177680.1"  
/db\_xref="GI:57117039 GeneID:3205061"  
/translation="MPTTKATQRRDVSTEIAYLTRALKAPTLRESVSRLADRARAENWSHEEYLAACLQREVSARESHGGEGRIR  
AARFPARKSLEEFDFEHARGLKRDTIAHLGTLDFITARDNVVFLGPAWHREDSSCGRPGDTRVSGRSSGAVRHRRRMGSTARRGS  
PRRAHLRRTHPALPLSAPGG"

CDS 3097405..3098121  
/locus\_tag="Rv2944"  
/inference="protein motif:PROSITE:PS00017"  
/note="Rv2944, (MTCY24G1.05c), len: 238 aa. Possible transposase for IS1533, similar to is-element proteins e.g. P15026|ISTB\_ECOLI istb protein from *Escherichia coli* (265 aa), FASTA scores: opt: 475, E(): 1.6e-21, (48.0% identity in 148 aa overlap); Z95436|MTY15C10\_14 from *Mycobacterium tuberculosis* (248 aa), FASTA scores: opt: 784, E(): 0, (87.4% identity in 135 aa overlap). Contains PS00017 ATP/GTP-binding site motif A (P-loop)."  
/codon\_start=1  
/transl\_table=11  
/product="Possible transposase for insertion sequence element IS1533"  
/protein\_id="NP\_217460.1"  
/db\_xref="GI:15610081 GeneID:887636"  
/translation="MSQCPGWPIAPAPRTGATKNTWPPACSGKCGPSPMVVRAASAPPASRLGSRWKSSTLSMLVASNATPSHI  
WAPWISSPPAITSCFWAPPGTGKTHLAVGLAIRACQAGHRVLFATAAEWVARLAEAHAGRIYAELTRLCRYPLLVVDEVGYIPF  
EPEAANLFFQLVSSRYERASLIVTSNKAFGRWGEVFGDDVVAAMIDRLVHHAEVVALKGDYSYRLKDRDLGRVPPAGTTEE"

CDS 3120898..3121287  
/locus\_tag="Rv2961"  
/experiment="EXISTENCE: identified in proteomics study"  
/note="Rv2961, (MTCY349.26c), len: 129 aa. Probable transposase, highly similar to C-terminus of O50414|Rv3387|MTV004.45 putative transposase from *Mycobacterium tuberculosis* (225 aa), FASTA scores: opt: 605, E(): 7.2e-34, (66.65% identity in 129 aa overlap); and similar to others e.g. CAC47401 putative partial transposase for ISRM17 protein from *Rhizobium meliloti* (*Sinorhizobium meliloti*) (174 aa), FASTA scores: opt: 183, E(): 2.6e-05, (30.25% identity in 129 aa overlap); etc. This region is a possible MT-complex-specific genomic island (See Becq et al., 2007)."  
/codon\_start=1  
/transl\_table=11  
/product="Probable transposase"  
/protein\_id="NP\_217477.1"  
/db\_xref="GI:15610098 GeneID:887316"  
/translation="MEHGNPHDAPQLAPAVERTTRAGRPPGTVTADRGGYGEKRVEDDLHDLGVRTVAIPRKGRRPSQARRAEEQR  
PSFRRTLVKWRGTGSEGRISTLKRNYGWNRSICIDGTEGTRIWTRHGILTHNLIKISSLAA"

CDS complement(3141400..3142779)  
/locus\_tag="Rv2978c"  
/experiment="EXISTENCE: identified in proteomics study"  
/note="Rv2978c, (MTCY349.09), len: 459 aa. Probable transposase for IS1538, very similar to several other putative transposases from *Mycobacterium tuberculosis* e.g. YX16\_MYCTU|Q10809 (460 aa), FASTA scores: opt: 2613, E(): 0, (83.0% identity in 458 aa overlap); etc. Low level matches to other transposases."

```

/codon_start=1
/transl_table=11
/product="Probable transposase"
/protein_id="NP_217494.1"
/db_xref="GI:15610115 GeneID:887390"
/translation="MPKFEVDPDGTWVQAFRFTLDPTEDQAKALARHFGARRKAYNWTVATLKADIQAWHASGTVTAKPSLRVLRK
RWNTVKDDVCVNTETGVAVWPECSKEAYADGIAGAVEAYWNWQTSRAGKRAGKRVGFPRFKRKRGRDQDRVSFTTGAMRVEPDRRH
LTLPLVIGTVRTHENTRRIERLIKAGRARVLAISVRRNGTRLDASVRVLVQRPQQPKVVHPGSRVGVVGVRRRLATVATADGTAIE
QVENPRPLGAALRELHVCRARSRCTKGSRRYRERTTQISRLHRRVNDVTRTHHLHLVLTTRLAQTHGRIVVEGLDATEMLRQKGLP
GARARRRGLSDAALGTPRRHLSYKTVWYGSALVADRWFPSKKTCHACRHHVQDIGWDEQWQCDRCSVHVQRDDCAAINLARYEET
SSIVGPGVAAVKRGADRKTGPRPAGGCEARKGSSPKAAEQPRDGVQVA"
CDS complement(3187283..3188530)
/locus_tag="Rv3023c"
/inference="protein motif:PROSITE:PS01007"
/note="Rv3023c, (MTV012.38c), len: 415 aa. Probable IS1081 transposase. Contains
PS01007 Transposases, Mutator family,signature. Similar to
P35882|TRA1_MYCTU|Rv1199c|MTCI364.11c and Rv2512c|MTCY07A7.18c transposases for
insertion sequence element IS1081 (415 aa), FASTA scores: opt: 2675, E(): 1.8e-162,
(100.0% identity in 415 aa overlap). Belongs to the mutator family of transposase."
/codon_start=1
/transl_table=11
/product="Probable transposase"
/protein_id="NP_217539.1"
/db_xref="GI:15610160 GeneID:888525"
/translation="MTSSHLIDAEQLLADQLAQASPDLLRGLLSTFIAALMGAEADALCGAGYRERSDERSNQNRNGYRHRDFDTR
AATIDVAIPKLRQGSYFPDWLLQRRKRAERALT SVVATCYLLGVSTRRMERLVETLGVTKLSKSQVSIMAKELDEAVEAFRTRPL
DAGPYTFLAADALVVKVREAGR VVGVTHTLIATGVNAEGYREILGIQVTS AEDGAGWLAFFRDLVARGLSGVALVTS DAHAGLVAA
IGATLPAAAWQRCRTHYAANLMAATPKPSWPVVRTLLHSIYDQPD AESVVAQYDRVLDALTDKLPVAEHLDTARTDLLAFTAFP
KQIWRQIWSNNPQERLNREVRRRTDVGIFPDRASIIIRLVGAVLAEQHDWEIEGRRYLGLEVLTRARAALTSTEEPAKQQTNTPT
ALTT"
CDS 3287359..3288606
/locus_tag="Rv3115"
/inference="protein motif:PROSITE:PS01007"
/note="Rv3115, (MTCY164.25), len: 415 aa. Probable IS1081 transposase, similar to
others. Has transposases, mutator family, signature (PS01007). Other copies are
MTCY10G2.02c,MTCY441.35, MTCY77.03c. This region is a possible MT-complex-specific
genomic island (See Becq et al.,2007)."
/codon_start=1
/transl_table=11
/product="Probable transposase"
/protein_id="NP_217631.1"
/db_xref="GI:15610252 GeneID:888790"
/translation="MTSSHLIDAEQLLADQLAQASPDLLRGLLSTFIAALMGAEADALCGAGYRERSDERSNQNRNGYRHRDFDTR
AATIDVAIPKLRQGSYFPDWLLQRRKRAERALT SVVATCYLLGVSTRRMERLVETLGVTKLSKSQVSIMAKELDEAVEAFRTRPL
DAGPYTFLAADALVVKVREAGR VVGVTHTLIATGVNAEGYREILGIQVTS AEDGAGWLAFFRDLVARGLSGVALVTS DAHAGLVAA
IGATLPAAAWQRCRTHYAANLMAATPKPSWPVVRTLLHSIYDQPD AESVVAQYDRVLDALTDKLPVAEHLDTARTDLLAFTAFP
KQIWRQIWSNNPQERLNREVRRRTDVGIFPDRASIIIRLVGAVLAEQHDWEIEGRRYLGLEVLTRARAALTSTEEPAKQQTNTPT
ALTT"
CDS 3351468..3351794
/locus_tag="Rv3184"
/note="Rv3184, (MTV014.28), len: 108 aa. Putative Transposase for IS6110 (fragment).
Identical to many other M. tuberculosis IS6110 transposase subunits. The transposase
described here may be made by a frame shifting mechanism during translation that
fuses Rv3184 and Rv3185,the sequence UUUUAAAG (directly upstream of Rv3185) maybe
responsible for such a frameshifting event (see McAdam et al., 1990). This region is
a possible MT-complex-specific genomic island (See Becq et al., 2007)."
/codon_start=1
/transl_table=11
/product="Probable transposase for insertion sequence element IS6110 (fragment)"
/protein_id="NP_217700.1"
/db_xref="GI:15610320 GeneID:888796"
/translation="MSGGSSRRYPPELRERAVRMVAEIRGQHDSEWAAISEVARLLGVGCAETVRKWVRQAQVDAGARPGTTTEE
SAELKRLRRDNAELRRANAILKTASAFFAAELDRPAR"
CDS 3351743..3352729
/locus_tag="Rv3185"
/note="Rv3185, (MTV014.29), len: 328 aa. Probable IS6110 transposase. Identical to
many other M. tuberculosis IS6110 transposase subunits. The transposase described
here may be made by a frame shifting mechanism during translation that fuses Rv3184
and Rv3185, the sequence UUUUAAAG (directly upstream of Rv3185) maybe responsible for

```

such a frameshifting event (see McAdam et al., 1990). Start changed since first submission (+ 16 aa). This region is a possible MT-complex-specific genomic island (See Becq et al., 2007)."

/codon\_start=1  
/transl\_table=11  
/product="Probable transposase"  
/protein\_id="NP\_217701.2"  
/db\_xref="GI:448824801 GeneID:887441"  
/translation="KDRVGFLLRGRARPASTLITRFIADHQGHREGPDGLRWGVESICTQLTELGVPIAPSTYYDHINREPSRREL  
RDGELKEHISRVAANYGVYGARKVWLTNLNREGIEVARCTVERLMTKLGSLGTTTRGKARRTTIADPATARPADLVQRRFGPPAPN  
RLWVADLTYVSTWAGFAYVAFVTDAYARRILGWRVASTMATSMVLDAIEQAIWTRQQEGVLDLKDVIHHTDRGSQYTSIRFSERL  
AEAGIQPSVAVGSSYDNALAEATINGLYKTELIKPGKPWRSIEDVELATARWVDWVFNHRRRLYQYCGDVPVPELEAAYYAQRQRPA  
AG"

CDS

3352951..3353277  
/locus\_tag="Rv3186"  
/note="Rv3186, (MTV014.30), len: 108 aa. Putative Transposase for IS6110 (fragment). Identical to many other M. tuberculosis IS6110 transposase subunits. The transposase described here may be made by a frame shifting mechanism during translation that fuses Rv3186 and Rv3187, the sequence UUUUAAAG (directly upstream of Rv3187) maybe responsible for such a frameshifting event (see McAdam et al., 1990). This region is a possible MT-complex-specific genomic island (See Becq et al., 2007)."

/codon\_start=1  
/transl\_table=11  
/product="Probable transposase for insertion sequence element IS6110 (fragment)"  
/protein\_id="NP\_217702.1"  
/db\_xref="GI:15610322 GeneID:888024"  
/translation="MSGGSSRRYPPELRERAVRMVAEIRGQHDSEWAAISEVARLLGVGCAETVRKWRQAQVDAGARPGTTTEE  
SAELKRLRRDNAELRRANAILKTASAFFAAELDRPAR"

CDS

3353226..3354212  
/locus\_tag="Rv3187"  
/note="Rv3187, (MTV014.31), len: 328 aa. Probable IS6110 transposase. Identical to many other M. tuberculosis IS6110 transposase subunits. The transposase described here may be made by a frame shifting mechanism during translation that fuses Rv3186 and Rv3187, the sequence UUUUAAAG (directly upstream of Rv3187) maybe responsible for such a frameshifting event (see McAdam et al., 1990). Start changed since first submission (+ 16 aa). This region is a possible MT-complex-specific genomic island (See Becq et al., 2007)."

/codon\_start=1  
/transl\_table=11  
/product="Probable transposase"  
/protein\_id="NP\_217703.2"  
/db\_xref="GI:448824802 GeneID:887604"  
/translation="KDRVGFLLRGRARPASTLITRFIADHQGHREGPDGLRWGVESICTQLTELGVPIAPSTYYDHINREPSRREL  
RDGELKEHISRVAANYGVYGARKVWLTNLNREGIEVARCTVERLMTKLGSLGTTTRGKARRTTIADPATARPADLVQRRFGPPAPN  
RLWVADLTYVSTWAGFAYVAFVTDAYARRILGWRVASTMATSMVLDAIEQAIWTRQQEGVLDLKDVIHHTDRGSQYTSIRFSERL  
AEAGIQPSVAVGSSYDNALAEATINGLYKTELIKPGKPWRSIEDVELATARWVDWVFNHRRRLYQYCGDVPVPELEAAYYAQRQRPA  
AG"

CDS

complement(3357498..3358532)  
/locus\_tag="Rv3191c"  
/experiment="EXISTENCE: identified in proteomics study"  
/note="Rv3191c, (MTV014.35c), len: 344 aa. Probable transposase, similar to many especially Q9K2N8 putative transposase from Pseudomonas aeruginosa (338 aa), FASTA scores: opt: 837, E(): 1.3e-43, (42.55% identity in 336 aa overlap); Q9RBF4 insertion sequence IS1088 from Alcaligenes eutrophus (Ralstonia eutropha) (342 aa), FASTA scores: opt: 823, E(): 9.2e-43, (43.05% identity in 337 aa overlap); and Q51379 putative transposase from Pseudomonas alcaligenes (338 aa), FASTA scores: opt: 818, E(): 1.8e-42, (42.35% identity in 333 aa overlap). Contains probable helix-turn-helix motif from aa 25 to 46 (Score 1968, +5.89 SD). This region is a possible MT-complex-specific genomic island (See Becq et al., 2007)."

/codon\_start=1  
/transl\_table=11  
/product="Probable transposase"  
/protein\_id="NP\_217707.1"  
/db\_xref="GI:15610327 GeneID:887628"  
/translation="MRQISSRYLSEERINIADLRRSGLSIRKIADQLGRAPSTVSRELRRNSRRDGQYRPFEAHRWAVQRRVRR  
HRRRIDKNPDLCELIAELLAQRWSPQQIARHLRRKYPDDRSMWLCHESIYQAVYQPQSRLIRPPQVKSPhRGPLRTGRTHRAHL  
RPGRRRPRFAQPMLSIHQRPFDPADRSEPGHWEGDLIVGKNQGSIAIGTLVERQTRLIRLLHLPHTHDAYCLRIAITETMSDLPVTL  
VRSITWDQGIEMARHIDITADLGAPVYFCDSPWQASRNENSNGLLRQYFPKGTSLSTYTPDHLRAVEYEINNRPQVLGHRSP  
AELFTALLTSPDHQLLRR"



CDS 3510620..3510946  
 /locus\_tag="Rv3325"  
 /note="Rv3325, (MTV016.25), len: 108 aa. Putative Transposase for IS6110 (fragment). Identical to many other M. tuberculosis IS6110 transposase subunits. The transposase described here may be made by a frame shifting mechanism during translation that fuses Rv3325 and Rv3326, the sequence UUUUAAAG (directly upstream of Rv3326) maybe responsible for such a frameshifting event (see McAdam et al., 1990). Belongs to the transposase family 8."  
 /codon\_start=1  
 /transl\_table=11  
 /product="Probable transposase for insertion sequence element IS6110 (fragment)"  
 /protein\_id="NP\_217842.1"  
 /db\_xref="GI:15610461 GeneID:887314"  
 /translation="MSGGSSRRYPPELRERAVRMVAEIRGQHDSEWAAISEVARLLGVCAGCAETVRKQVDAQVDAGARPGTTTEE  
 SAELKRLRRDNAELRRANAILKTASAFFAAELDRPAR"

CDS 3510895..3511881  
 /locus\_tag="Rv3326"  
 /note="Rv3326, (MTV016.26), len: 328 aa. Probable transposase for insertion element IS6110. Identical to many other M. tuberculosis IS6110 transposase subunits. The transposase described here may be made by a frame shifting mechanism during translation that fuses Rv3325 and Rv3326, the sequence UUUUAAAG (directly upstream of Rv3326) maybe responsible for such a frameshifting event (see McAdam et al., 1990). Start changed since first submission (+ 16 aa)."  
 /codon\_start=1  
 /transl\_table=11  
 /product="Probable transposase"  
 /protein\_id="NP\_217843.2"  
 /db\_xref="GI:448824808 GeneID:887563"  
 /translation="KDRVGFRLGRARPASTLITRFIADHQHREGPDGLRWGVESICTQLTELGVPIAPSTYYDHINREPSRREL  
 RDGELKEHISRVAANYGVYGARKVWLTNLNREGIEVARCTVERLMTKLGLSGTTRGKARRTTIADPATARPADLVQRRFGPPAPN  
 RLWVADLTYVSTWAGFAYVAFVTDAYARRILGWRVASTMATSMVLDAIEQAIWTRQQEGVLDLKDVIHHTDRGSQYTSIRFSERL  
 AEAGIQPSVAVGSSYDNALAEATINGLYKTELIKPGKPWRSIEDVELATARWVDWVFNHRRLYQYCGDVPVVELEAAYYAQRQRP  
 AG"

CDS 3531115..3531606  
 /locus\_tag="Rv3348"  
 /note="Rv3348, (MTV004.04), len: 163 aa. Probable transposase, partially similar to several insertion elements e.g. P19834|YI11\_STRCL insertion element IS116 hypothetical 44.8 KDA protein (similar to IS900 of Mycobacterium paratuberculosis) from Streptomyces clavuligerus (399 aa), FASTA scores: opt: 146, E(): 0.016, (29.1% identity in 158 aa overlap)."  
 /codon\_start=1  
 /transl\_table=11  
 /product="Probable transposase"  
 /protein\_id="NP\_217865.1"  
 /db\_xref="GI:15610484 GeneID:888110"  
 /translation="MTAENPGRSRRTLVGIDAAITACHHIAIRDDVGARSIRFSVEPTLAGLRTLTDKLSGYDDIDATVEPTSMT  
 WLPLTIAVENAGDTMHMAGARHCARLRGAIIVGKSKSDVIDAEVLTRASEVFDLTPLTPTPAQLALRRSVIRRAGAVIDANRSWR  
 RLMSLAR"

CDS complement(3531643..3532383)  
 /locus\_tag="Rv3349c"  
 /experiment="EXISTENCE: identified in proteomics study"  
 /note="Rv3349c, (MTV004.05c), len: 246 aa. Probable transposase pseudogene fragment, similar to part of Q50911|U10634 IS204 putative transposase from nocardia asteroides (377 aa), FASTA scores: opt: 288, E(): 8.3e-11, (48.5% identity in 97 aa overlap); and others."  
 /codon\_start=1  
 /transl\_table=11  
 /product="Probable transposase"  
 /protein\_id="NP\_217866.1"  
 /db\_xref="GI:15610485 GeneID:888126"  
 /translation="MAIDPAAAYASAIIRTPGLLPNAKLVDHVFHVTTLANDALTAVRRRVTVAFHDDRGRKIDPQWANRRRLLTA  
 RERLSDKSFAMRNRIAVDPRAQILSAWIAKEELRTLSTVVRTGGDPLARHHLHRFLPGASTRRSPNCSPWPPPLTSHPRSTP  
 SWSASPTRASVVGVEVAEMLGDIDGQCQVQVEVPVPERGPAGCGGLDGLGRAGVSATPRVCAAMTAVNVVAGRCAGQQADVGPTPQH  
 RCRGR"

CDS complement(3559532..3560518)  
 /locus\_tag="Rv3380c"  
 /note="Rv3380c, (MTV004.38c), len: 328 aa. Probable transposase subunit for IS6110. Identical to many other M. tuberculosis IS6110 transposase subunits. The transposase described here may be made by a frame shifting mechanism during translation that

fuses Rv3380c and Rv3381c, the sequence UUUUAAAG (directly upstream of Rv3380c) maybe responsible for such a frameshifting event (see McAdam et al., 1990). Start changed since first submission (+ 34 aa)."

/codon\_start=1  
/transl\_table=11  
/product="Probable transposase"  
/protein\_id="NP\_217897.2"  
/db\_xref="GI:448824811 GeneID:887411"  
/translation="KDRVGFLLRGRARPASTLITRFIADHQGHREGPDGLRWGVESICTQLTELGVPIAPSTYYDHINREPSRREL  
RDGELKEHISRVAANYGVYGARKVWLTNLNREGIEVARCTVERLMTKLGSLGTTTRGKARRTTIADPATARPADLVQRRFGPPAPN  
RLWVADLTYVSTWAGFAYVAFVTDAYARRILGWRVASTMATSMVLDAIEQAIWTRQQEGVLDLKDVIHHTDRGSQYTSIRFSERL  
AEAGIQPSVAVGSSYDNALAEATINGLYKTELIKPGKPWRSIEDVELATARWVDWVFNHRRRLYQYCGDVPVPELEAAYYAQRQRPA  
AG"

CDS complement(3560467..3560793)  
/locus\_tag="Rv3381c"  
/note="Rv3381c, (MTV004.39c), len: 108 aa. Putative Transposase for IS6110 (fragment). Identical to many other M. tuberculosis IS6110 transposase subunits. The transposase described here may be made by a frame shifting mechanism during translation that fuses Rv3380c and Rv3381c, the sequence UUUUAAAG (directly upstream of Rv3380c) maybe responsible for such a frameshifting event (see McAdam et al., 1990)."

/codon\_start=1  
/transl\_table=11  
/product="Probable transposase for insertion sequence element IS6110 (fragment)"  
/protein\_id="NP\_217898.1"  
/db\_xref="GI:15610517 GeneID:887646"  
/translation="MSGGSSRRYPPELRERAVRMVAEIRGQHDSEWAAISEVARLLGVGCAETVRKWRQAQVDAGARPGTTTEE  
SAELKRLRRDNAELRRANAILKTASAFFAAELDRPAR"

CDS 3564524..3565228  
/locus\_tag="Rv3386"  
/experiment="EXISTENCE: identified in proteomics study"  
/note="Rv3386, (MTV004.44), len: 234 aa. Possible transposase, showing very weak similarity to several is element transposases. Highly similar (but shorter) to P963659|MTCY10G2\_13|Rv1036c from Mycobacterium tuberculosis (112 aa), FASTA scores: opt: 507, E(): 8.3e-25, (83.9% identity in 87 aa overlap)."

/codon\_start=1  
/transl\_table=11  
/product="Possible transposase"  
/protein\_id="NP\_217903.1"  
/db\_xref="GI:15610522 GeneID:888044"  
/translation="MFRTVGDQASLWESVLPPELRRRLPEELARVDALLDDSAFFCFVFPFFDPRMGRPSIPMETYLRLMFLKFRY  
RLGYESLCREVTDSTWRRFCRIPLEGSVPHPTTLMLKLTTRCGEDAVAGLNEALLAKAASEKLLRTNKVRADTTVVEGDVGYPTD  
TGLLAKAVGSMARTVARIKAADAGSAPLGGSSGPRDRLQAAVTRRAATRSGAGLRAPDHRGASRRDRAGADRRCRGGT"

CDS 3565218..3565895  
/locus\_tag="Rv3387"  
/note="Rv3387, (MTV004.45), len: 225 aa. Possible transposase, showing very weak similarity to other is element proteins, and similar to various hypothetical proteins."

/codon\_start=1  
/transl\_table=11  
/product="Possible transposase"  
/protein\_id="NP\_217904.1"  
/db\_xref="GI:15610523 GeneID:887820"  
/translation="MVRNAQRAVRRASGRKAWLRQAINHLEKLIGRTERVVDQARSRLAGVMPDSSSRLVSLHDADARPIRKGR  
LGKPVFEFGYKAQVVDNADGVILDHSVELGNPADAPQLAPAIERISRRTGRPPRAVTDARGCGDASVEDDLHLQLGVRNVAIPRKS  
PSATRRAFEHRRFRDKIKWRTGSEGRINHLKRSYGNRTELGTGARTWCGHGVFAHNLVKISTLAA"

CDS complement(3604891..3605646)  
/locus\_tag="Rv3427c"  
/experiment="EXISTENCE: identified in proteomics study"  
/inference="protein motif:PROSITE:PS00017"  
/note="Rv3427c, (MTCY78.02), len: 251 aa. Possible transposase, similar to other e.g. Q9APG8|ORF2 putative transposase subunit 2 from Pseudomonas putida (251 aa),FASTA scores: opt: 479, E(): 1.8e-21, (34.85% identity in 238 aa overlap). Contains PS00017 ATP/GTP-binding site motif A."

/codon\_start=1  
/transl\_table=11  
/product="Possible transposase"  
/protein\_id="NP\_217944.1"  
/db\_xref="GI:15610563 GeneID:887631"

```

/translation="MSICDPALRNALRTLKLSGMLDITLDARLAQTRNGDLGHLEFLQALREDEIARRESAALTRRLRRAKFEAQA
TFEDFDFTANPKLPGAMLRDLAALRWLDAGESVILHGPVGVGKTHVAQALVHAVARRGGDVRFAKTSRMLSDLAGGHADRSWGQR
IREYTKPLVILDDFAMREHTAMHADDLYELISDRAITGKPLILTSNRAPNNWYGLFPNPNVVAESLLDRLINTSHQILMDGPSYR
PRKRPRGRTTS"
CDS complement(3605744..3606976)
/locus_tag="Rv3428c"
/experiment="EXISTENCE: identified in proteomics study"
/note="Rv3428c, (MTCY78.01, len: 410 aa. Possible transposase insertion sequence,
similar to others e.g. Q9APG9|ORF1 from Pseudomonas putida (509 aa), FASTA scores:
opt: 578, E(): 1.1e-29, (32.45% identity in 376 aa overlap); P55379|Y4BL_RHISN from
Rhizobium sp. strain NGR234 (516 aa), FASTA scores: opt: 665, E(): 2.7e-35,(35.3%
identity in 391 aa overlap); etc."
/codon_start=1
/transl_table=11
/product="Possible transposase"
/protein_id="NP_217945.1"
/db_xref="GI:15610564 GeneID:887621"
/translation="MATIAQRLRDDHGVAASESSVRRWIATHFAEEVARERVTVPVPRGPDVAGSEAQIDYGRIGMWFDPATARRVA
VWAFVMVLAFSRHLFVRPVIKMDQTAWCACHVAAEFFDGVPARLVCDNLRGTGVDKPDLYDPQINRSYAEELASHYATLVDPARAR
KPKDKPRVERPMTYVRDSFWKGRFDSLQMQAAVTFWSTEVAGLRYLRALEGAQPLRMFEAVEQQALIALPPRAFELTSWSIGT
VGVDTHLKVGGKALYSVPWRLLIGQRLHARTAGDVVQIFAGNDVVATHVRRPSGRSTDFSHYPPEKIAFHMRTPTWCRHTAELVGPA
SQQVIAEFMRDNAIHHLRSQAQVGLGRDKHGCDRLEAACARAIEVGDPSYRTIKGILVAGTEHAANEPTTSSPASTAGVPARP"
CDS complement(3608171..3609274)
/locus_tag="Rv3430c"
/experiment="EXISTENCE: identified in proteomics study"
/note="Rv3430c, (MTCY77.02c), len: 387 aa. Possible IS1540 transposase, similar to
several e.g. Q49592 transposase from Mycobacterium intracellulare (340 aa), FASTA
scores: opt: 1377, E(): 1.6e-81, (64.2% identity in 338 aa overlap); similarity is
lost at C-terminus due to possible frameshift after aa 297."
/codon_start=1
/transl_table=11
/product="Possible transposase"
/protein_id="NP_217947.1"
/db_xref="GI:15610566 GeneID:887615"
/translation="MIDTAIEEMIPLIGVRAACAATGRAPASYRAHRSKRLSAQSDTFTSTAVTDPSPRESAQPRALSAAREH
VLAVLNSQRFADMAPAVVYATLLDEGIYLCSESTMYRLLRERQGTGDRRRQATHPAAVKPELVAHQPNSVWSWDITKLRGPAKWS
YYLYLVILDIFSRYVVGWVMVASRESKVLAEERLIAQTLAAQHISADQLTLHADRGSSMSKPVALLLADLGVTKSHSRPHTSNDNP
LSEAQFKTLKYRPFDPKRFESIEAARVHCDRFFGWYNHEHKHSGIGLHTPADVHYGRADQIRRHRATVLDTAYRDHLERIRSQTT
RATRATGLQRDQPTTEGGPADSINPRKSLRNVDVFRPGLLD"
CDS complement(3609763..3610608)
/locus_tag="Rv3431c"
/note="Rv3431c, (MTCY77.03c), len: 281 aa. Possible truncated transposase for IS1552,
similar to, but shorter than other transposases e.g. P72303 from Rhodococcus opacus
(418 aa), FASTA scores: opt: 1509, E(): 1.2e-91, (80.95% identity in 278 aa overlap);
Q9AKV5 from Mycobacterium paratuberculosis (395 aa), FASTA scores: opt: 1115, E():
7.8e-66, (63.45% identity in 268 aa overlap); etc."
/codon_start=1
/transl_table=11
/product="Possible transposase (fragment)"
/protein_id="NP_217948.1"
/db_xref="GI:15610567 GeneID:887608"
/translation="MFAELIRAGLQALIEAEATEAIGAGRYERSDGRIVHRNGHRPKTVSTTAGDIEVQIPKLRAGSFFPSSLER
RRRIDKALHAVIMEAYVHGVSTRSVDDLVAAMGVQAGVSKSEVSRI CAGLDTEIEAFRTRSLTHTTEFPYVFCDATFCCKVRVGAHV
VSQALVVATGVSIDGTREVLGTAVGDSESYEFWREFLASLKGRLTGVLHVISDAHAGLKAAVAQQFSGASWQRCRVHFMRNLYT
AVAAKHAPAVTVAVKTI FAHTDPEEVGAQWDRVADPLCQP"
CDS 3651299..3651625
/locus_tag="Rv3474"
/note="Rv3474, (MTCY13E12.27), len: 108 aa. Probable transposase subunit for IS6110.
Identical to many other M. tuberculosis IS6110 transposase subunits. The transposase
described here may be made by a frame shifting mechanism during translation that
fuses Rv3474 and Rv3475, the sequence UUUUAAAG (directly upstream of Rv3475) maybe
responsible for such a frameshifting event (see McAdam et al., 1990). Belongs to the
transposase family 8."
/codon_start=1
/transl_table=11
/product="Possible transposase for insertion element IS6110 (fragment)"
/protein_id="NP_217991.1"
/db_xref="GI:15610610 GeneID:888097"
/translation="MSGSSRRYPPELRERAVRMVAEIRGQHDSEWAAISEVARLLGVGCAETVRKWRQAQVDAGARPGTTTEE

```

CDS

SAELKRLRRDNAELRRANAILKTASAFFAAELDRPAR"  
3651574..3652560  
/locus\_tag="Rv3475"  
/note="Rv3475, (MTCY13E12.28), len: 328 aa. Probable transposase subunit for IS6110. Identical to many other M. tuberculosis IS6110 transposase subunits. The transposase described here may be made by a frame shifting mechanism during translation that fuses Rv3474 and Rv3475, the sequence UUUUAAAG (directly upstream of Rv3475) maybe responsible for such a frameshifting event (see McAdam et al., 1990). Start changed since first submission (- 18 aa)."  
/codon\_start=1  
/transl\_table=11  
/product="Possible transposase for insertion element IS6110 [second part]"  
/protein\_id="NP\_217992.2"  
/db\_xref="GI:448824814 GeneID:888055"  
/translation="KDRVGFLLRGRARPASTLITRFIADHQGHREGPDGLRWGVESICTQLTELGVPIAPSTYYDHINREPSRREL  
RDGELKEHISRVAANYGVYGARKVWLTNLNREGIEVARCTVERLMTKLGSLGTRGKARRTTIADPATARPADLVQRRFGPPAPN  
RLWVADLTYVSTWAGFAYVAFVTDAYARRILGWRVASTMATSMVLDAIEQAIWTRQQEGVLDLKDVIHHTDRGSQYTSIRFSERL  
AEGIQPSVGAVGSSYDNLAAETINGLYKTELIKPGKPWRSIEDVELATARWVDWVFNHRRRLYQYCGDVPVVELEAAYYAQRQPA  
AG"

CDS

3804387..3804734  
/locus\_tag="Rv3636"  
/note="Rv3636, (MTCY15C10.16c), len: 115 aa. Possible transposase, weakly similar to others e.g. O69924|SC3C8.12 putative transposase from Streptomyces coelicolor (487 aa) FASTA scores: opt: 132, E(): 0.12, (33.05% identity in 112 aa overlap); O96916 TC1-like transposase from Anopheles gambiae (African malaria mosquito) (332 aa), FASTA scores: opt: 117, E(): 0.84, (30.75% identity in 91 aa overlap); Q9R2U5|IS466A|IS466A-ORF|TNPA|IS469|SCP1.276 transposase (insertion element IS466S transposase) from Streptomyces coelicolor (513 aa), FASTA scores: opt: 114, E(): 2, (30.5% identity in 82 aa overlap); etc. Similar in part to P96288|Rv2943|MTCY24G1.06c hypothetical 45.8 KDA protein from Mycobacterium tuberculosis (413 aa), FASTA scores: opt: 533, E(): 1.4e-28, (74.55% identity in 110 aa overlap). Contains possible helix-turn-helix motif from aa 19-40 (+4.98 SD)."  
/codon\_start=1  
/transl\_table=11  
/product="Possible transposase"  
/protein\_id="NP\_218153.1"  
/db\_xref="GI:15610772 GeneID:885274"  
/translation="MLSVEDWAEIRRLRRSERLPISSEIARVLKISRNTVKSALASDGPVKYQRAAKGSVADEAEPRIRELLAAYP  
RMPATVIAERIGWYISIRTLSGRVRELRLPLYLPPDPASRDICGR"

CDS

3805119..3805619  
/locus\_tag="Rv3637"  
/note="Rv3637, (MTCY15C10.15c), len: 166 aa. Possible transposase. C-terminal end highly similar to Q9RLQ9|ISTA putative transposase a (fragment) from Mycobacterium bovis (102 aa), FASTA scores: opt: 397, E(): 1.4e-19, (58.8% identity in 102 aa overlap). Weakly similar to others e.g. Q9KJ02 putative transposase (fragment) from Polyanium cellulose (329 aa), FASTA scores: opt: 191, E(): 1.6e-05, (32.1% identity in 134 aa overlap); Q9LCU2|ISTA cointegrase from Pseudomonas aeruginosa (382 aa) FASTA scores: opt: 144, E(): 0.024, (26.8% identity in 123 aa overlap); P15025|ISTA\_PSEAE transposase for insertion sequence element IS21 from Pseudomonas aeruginosa (390 aa), FASTA scores: opt: 144, E(): 0.025, (26.85% identity in 123 aa overlap); etc. Also highly similar to C-terminal end of P96288|Rv2943|MTCY24G1.06c hypothetical 45.8 KDA protein from Mycobacterium tuberculosis (413 aa) FASTA scores: opt: 722, E(): 1.5e-40, (63.7% identity in 168 aa overlap)."  
/codon\_start=1  
/transl\_table=11  
/product="Possible transposase"  
/protein\_id="NP\_218154.1"  
/db\_xref="GI:15610773 GeneID:885496"  
/translation="MPGRVFASPADFNTQLQAWLVRANHRQHRVLGCRPADRIEADTAAMLTLPPVGPSIGWRTSTRLPRDHYVR  
LDGNDYSVHPVAIGRRIEITADLSRVRVWCGGTLVADHRIWAKHQITISDPEHVVAAKLLRRKRFDIVGPPHHVEVEQRLLTYYD  
TVLGLDGPVA"

CDS

3805619..3806365  
/locus\_tag="Rv3638"  
/note="Rv3638, (MTCY15C10.14c), len: 248 aa. Possible transposase, highly similar to Q9RLQ8|ISTB ISTB protein from Mycobacterium bovis (266 aa), FASTA scores: opt: 784, E(): 4e-46, (78.0% identity in 259 aa overlap); and similar to others e.g. P15026|ISTB\_PSEAE insertion sequence IS21 putative ATP-binding protein from Pseudomonas aeruginosa (265 aa), FASTA scores: opt: 420, E(): 2.2e-21, (38.8% identity in 255 aa overlap); Q45619|ISTB\_BACST insertion sequence IS5376 putative

ATP-binding protein from *Bacillus stearothermophilus* (251 aa), FASTA scores: opt: 402, E(): 3.6e-20, (34.5% identity in 232 aa overlap); P15026|ISTB\_ECOLI ISTB protein from *Escherichia coli* (265 aa), FASTA scores: opt: 419, E(): 8e-23, (38.8% identity in 255 aa overlap); etc. C-terminus highly similar to C-terminus of P96287|Rv2944|MTCY24G1.05 hypothetical 25.5 KDA protein from *Mycobacterium tuberculosis* strain H37Rv (alias AAK47343|MT3016 IS1533, ORFB from *Mycobacterium tuberculosis* strain CDC1551) (238 aa), FASTA scores: opt: 784, E(): 3.6e-46, (87.4% identity in 135 aa overlap)."

/codon\_start=1  
/transl\_table=11  
/product="Possible transposase"  
/protein\_id="NP\_218155.1"  
/db\_xref="GI:15610774 GeneID:885803"  
/translation="MAAKTATNSRDVAAELAYLTRALKAPTLRGAIEQLADRARTKTWSYEEFLAACLQREVSARESHGGEGRIR AARFPSRKSLEEFDFDHARGLKRDTIAHLGTLDFVTLAIGIAIRACQAGHRVLFATASQWVDRLAAAHSGTLQSELIRLARYPL LVVDEVGYIPFEPEANLFFQLVSSRYERASLIVTSNPKFGRWGEVFGDDVVAAMIDRLVHHAEVIALKGDYSRIKDRDLGRVP TVTADDQ"

CDS

complement(3807155..3808384)  
/locus\_tag="Rv3640c"  
/experiment="EXISTENCE: identified in proteomics study"  
/note="Rv3640c, (MTCY15C10.12), len: 409 aa. Probable transposase, highly similar to others e.g. Q48882 transposase from *Mycobacterium avium* (411 aa) FASTA scores: opt: 1574, E(): 6.2e-93, (59.75% identity in 400 aa overlap); Q9AKV5 putative transposase (fragment) from *Mycobacterium paratuberculosis* (395 aa), FASTA scores: opt: 1566, E(): 1.9e-92, (60.0% identity in 395 aa overlap); Q48368 transposase from *Mycobacterium avium* (410 aa), FASTA scores: opt: 1561, E(): 4.1e-92, (59.4% identity in 404 aa overlap); etc."

/codon\_start=1  
/transl\_table=11  
/product="Probable transposase"  
/protein\_id="NP\_218157.1"  
/db\_xref="GI:15610776 GeneID:885324"  
/translation="MALPQSALSELLDAFRTGDGVDLIRDAVRLVQLELSELEATERIGAARYERSDTRVTDNRGARSRLVSTQA GDVELRIPKLRKGSFFPAILEPRRRIDQALYAVVMEAYVHGISTRVDDLVLEAMGVETGISKSEVSRICAGLDEIVGAFRTTLG HIEFPYVYLDATYLNVRNGTGQVVSMAVIVASGIAADGSRILGLDVGDSSEDTFWRGFLTSLKGRGLGGVRLVIVSDQHAGLVKA LKRCFQAGHQRCRVHFARNLLAHVPKDKADMVASMFRMIF SAPDAEAVHATWEGVRDRLAASF PKIGPLMDDARA EVLAFTAFP KAHWQKIWSTNPLERINKEIKRRSRVVGIFPNPAAVIRLVGAVLADMHDEWQASERRYLSEASMLLYPDSNNAVVA AISGGQ"

CDS

complement(3941817..3941999)  
/locus\_tag="Rv3770A"  
/note="Rv3770A, len: 60 aa. Probable remnant of a transposase, similar to many e.g. Rv2812|MTCY16B7.31c|Z81331\_17 IS1604 putative transposase from *Mycobacterium tuberculosis* (469 aa), FASTA scores: opt: 204, E(): 1e-07, (80.5% identity in 41 aa overlap). Continuation of Rv3770B."

/codon\_start=1  
/transl\_table=11  
/product="Probable remnant of a transposase"  
/protein\_id="YP\_178012.1"  
/db\_xref="GI:57117153 GeneID:3205079"  
/translation="MGSTPWCNPQCQTLRTPVEVLELAVALRPENPDRTAGAIQRILRAQLAGDRIALRGRGS"

CDS

complement(3942014..3942205)  
/locus\_tag="Rv3770B"  
/note="Rv3770B, len: 63 aa. Probable remnant of a transposase, similar to many e.g. Rv2812|MTCY16B7.31c|Z81331\_17 IS1604 putative transposase from *Mycobacterium tuberculosis* (469 aa), FASTA scores: opt: 379, E(): 1.6e-21, (93.55% identity in 62 aa overlap). Continues as Rv3770A."

/codon\_start=1  
/transl\_table=11  
/product="Probable remnant of a transposase"  
/protein\_id="YP\_178013.1"  
/db\_xref="GI:57117154 GeneID:3205080"  
/translation="MRAERARAIGLFRYQLIREAADAHAHSTKERGKMOVRELASREHTDPFGRKVRISRHTIDRWIRN"

CDS

3978929..3980263  
/locus\_tag="Rv3798"  
/note="Rv3798, (MTV026.03), len: 444 aa. Probable transposase for insertion sequence element IS1557, highly similar to Q60255 similar to transposase of ISAE1 from *alcaligenes eutrophus* H1-4 (fragment) from dibenzofuran-degrading bacterium DPO360 (163 aa) FASTA scores: opt: 767, E(): 3.2e-42, (67.25% identity in 168 aa overlap); and similar to P74920 transposase from *Thiobacillus ferrooxidans* (404 aa), FASTA scores: opt: 375, E(): 1.1e-16, (27.55% identity in 439 aa overlap); Q48349

transposase from *Alcaligenes eutrophus* (*Ralstonia eutropha*) (408 aa), FASTA scores: opt: 324, E(): 2e-13, (3.9% identity in 369 aa overlap); Q9FDC1|TNP transposase from *Burkholderia mallei* (*Pseudomonas mallei*) (386 aa) FASTA scores: opt: 282, E(): 9.8e-11, (25.85% identity in 391 aa overlap); etc. C-terminal end identical to O53804|Rv0741|MTV041.15 transposase from *Mycobacterium tuberculosis* (104 aa), FASTA scores: opt: 582, E(): 1.8e-30, (85.6% identity in 104 aa overlap). Belongs to the transposase family 12."

/codon\_start=1  
/transl\_table=11  
/product="Probable transposase"  
/protein\_id="NP\_218315.1"  
/db\_xref="GI:15610934 GeneID:886268"  
/translation="MRNVRLFRALLGVDKRTVIEDIEFEEDDAGD GARVIARVPRSAVLRRCGRKASWYDRGAGLRQWRSL  
DWGTVEVFLEAEAPRVNCPHTGPTVVAVPWARHHAGHTYAFDDTVAWLAVACSKTAVCELMRIAWRTVGAIVARVWADTEKRIDR  
FANLRRIGIDEISYKRHHRYLTVVVDHDSGRLVWAAPGHDKATLGLFFDALGAERAAQITHVSADAADWIADVVTERTCPDAIQCA  
DPFHVVAWATEALDVERRRRAWNDARAIARTEPKWGRGRPGKNAAPRPGRERARRLKGARYALWKNPEDLTERQSAKLAWIAKTDP  
RLYRAYLLKESLRHVFSVKGEEGKQALDRWISWAQR CRIPVFVELAARIKRHRVAIDAALDHGLSQGLIESTNTKIRLLTRIAFG  
FRSPQALIALAMLTLAGHRPTLPGRHNHPQISQ"

CDS

complement(4025984..4027210)  
/locus\_tag="Rv3827c"  
/experiment="EXISTENCE: identified in proteomics study"  
/note="Rv3827c, (MTCY409.03), len: 408 aa. Possible transposase within IS1537 element, similar to several transposases e.g. O83029|TNPC|DR2324|DR0666|DR0978|DR1381|D R1651|DR1933 transposase from *Deinococcus radiodurans*(408 aa) FASTA scores: opt: 302, E(): 3.9e-12, (30.75% identity in 358 aa overlap); Q9RXX7|DR0178 putative transposase from *Deinococcus radiodurans* (409 aa), FASTA scores: opt: 297, E(): 8.2e-12, (31.1% identity in 360 aa overlap); P73816|SLR2062 transposase from *Synechocystis* sp. strain PCC 6803 (400 aa), FASTA scores: opt: 296, E(): 9.3e-12, (30.05% identity in 353 aa overlap); etc. Highly similar to proteins from *Mycobacterium tuberculosis* e.g. O33333|Rv2791c|MTV002.56c transposase (459 aa) FASTA scores: opt: 2211, E(): 9.4e-136, (87.75% identity in 367 aa overlap); P95117|Rv2978c|MTCY349.09 hypothetical 51.4 KDA protein (459 aa), FASTA scores: opt: 2165, E(): 9e-133, (85.85% identity in 367 aa overlap); Q10809|YS85\_MYCTU|Rv2885c|MT2953|MTCY274.16c hypothetical 51.3 KDA protein (460 aa), FASTA scores: opt: 2127, E(): 2.6e-130, (83.95% identity in 368 aa overlap); O0777|Rv0606|MTCY19H5.16c probable transposase (fragment) (247 aa), FASTA scores: opt: 1405, E(): 9.3e-84, (85.3% identity in 238 aa overlap); etc."

/codon\_start=1  
/transl\_table=11  
/product="Possible transposase"  
/protein\_id="NP\_218344.1"  
/db\_xref="GI:15610963 GeneID:886151"  
/translation="MMARFEVPEGWCVQAFRFTLDPTEDQARALARHF GARRKAYN WAVATL KADIEAWRV TGIGTVKPSLRVLR  
KRWNTVKDEV CVNAETGAVWWPECSKEAYADGIGGAVDAYWNWQNSRSRGKREGKTMGFPRFKKKGRDQDRVFTTTGAMRVEPDRR  
HLTLPVVGTVRTHENTRRIERLIATGRARVLAISVRNRGTRLDASVRVLVQRPQQPNVAQPGSRVGV DVGVRRLATVANEAGAVL  
EEVNPNRPLDTALKELRYASRARSRCTKGSRRYRERTEISRLHRRVNDVTRTHHLHVLTTRLAQTHGHI VVEGLDAAGMLRQKGL  
PGARARRRGLSDSALGTPRRHLSYKGTGWYGSALV VADRWFPSLSVEPTVRPGLARLVAVKRGREAAAWLPNNPETGCKSRDH"

CDS

complement(4027207..4027818)  
/locus\_tag="Rv3828c"  
/inference="protein motif:PROSITE:PS00397"  
/note="Rv3828c, (MTCY409.02), len: 203 aa. Possible resolvase within IS1537 element, similar to others e.g. Q97X40|SSO1915 first ORF in transposon ISC1913 from *Sulfolobus solfataricus* (213 aa), FASTA scores: opt: 275, E(): 1.6e-11, (30.6% identity in 196 aa overlap); Q9V1M0|PAB2076 resolvase related protein from *Pyrococcus abyssi* (212 aa), FASTA scores: opt: 254, E(): 4.2e-10, (29.95% identity in 197 aa overlap); Q9RMU7|ORFA putative transposase (belongs to the MerR family of transcriptional regulators) from *Helicobacter pylori* (*Campylobacter pylori*) (217 aa), FASTA scores: opt: 243, E(): 2.3e-09, (31.8% identity in 154 aa overlap); etc. Also highly similar to proteins from *Mycobacterium tuberculosis* e.g. O33334|Rv2792c|MTV002.57c resolvase (193 aa), FASTA scores: opt: 970, E(): 1.5e-58, (79.25% identity in 193 aa overlap); O07773|Rv0605|MTCY19H5.17c putative resolvase (202 aa), FASTA scores: opt: 964, E(): 4e-58, (76.25% identity in 202 aa overlap); P95116|Rv2979c|MTCY349.08 hypothetical 21.4 KDA protein (194 aa), FASTA scores: opt: 895, E(): 1.8e-53, (74.75% identity in 194 aa overlap); Q10831|YS86\_MYCTU|Rv2886c|MT2954|MTCY274.17c hypothetical 31.9 KDA protein (295 aa), FASTA scores: opt: 826, E(): 1.1e-48, (66.2% identity in 204 aa overlap) (similarity only at C-terminus); etc. Contains PS00397 Site-specific recombinases active site. Possible helix-turn-helix motif from aa 11-32, Score 1305 (+3.63 SD)."  
/codon\_start=1

/transl\_table=11  
 /product="Possible resolvase"  
 /protein\_id="NP\_218345.1"  
 /db\_xref="GI:15610964 GeneID:886160"  
 /translation="MSVVCCRNRWMLAVWAERNGVAWVIAYRWFRAGLLPVPAQRVGRLLILVNDPAVEESGRGRTLVIYARVSSA  
 DQRSDLDLRRVARVTAWATSQHLSVDKVVVAEGGWALNGHRRKFFALLGDPVVTRIVVEHRDRFCWFGSEYVEAALVAQGRELVVVD  
 LAEVDDDLVLGDMTEILTSMCARLYGERAAQNGAKRALAAAVGDAAEA"  
 CDS 4043196..4043687  
 /locus\_tag="Rv3844"  
 /note="Rv3844, (MTCY01A6.25), len: 163 aa. Possible transposase, identical to  
 P96234|Rv3348|MTV004.04 putative transposase from Mycobacterium tuberculosis. Also  
 some similarity with others e.g. N-terminal part of P19834|YI11\_STRCL insertion  
 element IS116 hypothetical 44.8 KDA protein from Streptomyces clavuligerus (399 aa)  
 FASTA scores: opt: 146, E(): 0.017, (29.1% identity in 158 aa overlap)."  
 /codon\_start=1  
 /transl\_table=11  
 /product="Possible transposase"  
 /protein\_id="NP\_218361.1"  
 /db\_xref="GI:15610980 GeneID:886180"  
 /translation="MTAENPGRSRRTLVGIDAAITACHHIAIRDVVGARSIRFSVEPTLAGLRTLTDKLSGYDDIDATVEPTSMT  
 WLPLTIAVENAGDTMHMAGARHCARLRGAIVGKSKSDVIDAEVLTRASEVFDLTLPLTPAQLALRRSVIRRAGAVIDANRSWR  
 RLMSLAR"  
 misc\_feature 1187573..1188124  
 /locus\_tag="Rv1150"  
 /note="Rv1150, (MTCI65.17), len: 183 aa. Possible fragment of transposase  
 (pseudogene). Identical to C-terminal part of S21394 transposase of putative  
 Mycobacterium tuberculosis is element (308 aa), FASTA scores: opt: 959,E(): 0, (99.3%  
 identity in 145 aa overlap). The transposase described here may be made by a -1 frame  
 shifting mechanism during translation that fuses Rv1149|MTCI65.16 and  
 Rv1150|MTCI65.17. No evidence found to account for discrepancy with previously  
 published sequence. Second copy is Rv1041c|MTCY10G2.08."  
 /pseudogene="unknown"  
 mobile\_element 648644..649283  
 /note="IS1536, len: 1384 nt. Partial copy of insertion sequence IS\_1536. This region  
 is a possible MT-complex-specific genomic island (See Becq et al.,2007).  
 /mobile\_element\_type="insertion sequence:IS1536"  
 mobile\_element 778868..779069  
 /note="IS1557'-1, len: 517 nt. Region similar to Insertion sequence IS1557 on  
 MTCY373- (IS1557- 1st copy). This region is a possible MT-complex-specific genomic  
 island (See Becq et al., 2007). /mobile\_element\_type="insertion sequence:IS1557'-1"  
 mobile\_element 826243..827597  
 /note="IS6110-1, len: 1355 nt. Insertion sequence IS6110.  
 /mobile\_element\_type="insertion sequence:IS6110-1"  
 mobile\_element 827610..828701  
 /note="IS1547-1, len: 1092 nt. Insertion sequence IS1547.  
 /mobile\_element\_type="insertion sequence:IS1547-1"  
 mobile\_element 858797..859084  
 /note="IS1605', len: 288 nt. Insertion sequence IS1605'.  
 /mobile\_element\_type="insertion sequence:IS1605'"  
 mobile\_element 879224..879554  
 /note="IS1606', len: 331 nt. Insertion sequence IS1606'  
 /mobile\_element\_type="insertion sequence:IS1606'"  
 mobile\_element complement(952646..954081)  
 /note="IS1554, len: 1436 nt. Putative Insertion sequence element bounded by 15 bp  
 inverted repeats. /mobile\_element\_type="insertion sequence:IS1554"  
 mobile\_element 954249..956548  
 /note="IS1535, len: 2300 nt. Putative Insertion sequence element bounded by 16 bp  
 inverted repeats. /mobile\_element\_type="insertion sequence:IS1535"  
 mobile\_element complement(1080967..1082479)  
 /note="IS1560-1, len: 1513 nt. Insertion sequence IS1560.  
 /mobile\_element\_type="insertion sequence:IS1560-1"  
 mobile\_element complement(1084614..1085591)  
 /note="IS-LIKE-1, len: 978 nt. Insertion sequence, ISLIKE,region identical to cosmid  
 y348, blast score= 4902 (+1) 9377 10354 EM\_NEW:MTAD20 Ad000020 Mycobacterium  
 tuberculosis sequence from clone y348. This region is a possible MT-complex-specific  
 genomic island (See Becq et al., 2007). /mobile\_element\_type="insertion  
 sequence:IS-LIKE-1"  
 mobile\_element 1089340..1090774  
 /note="IS1081-1, len: 1435 nt. Insertion sequence IS1081,almost identical to

Mycobacterium bovis IS1081 (7157(-1) 60 14 94 EM\_BA:MBBIS1081 X84741 Mycobacterium bovis BCG IS1081 DNA. 4/96. This region is a possible MT-complex-specific genomic island (See Becq et al.,2007). /mobile\_element\_type="insertion sequence:IS1081-1"

mobile\_element 1187147..1188130  
/note="IS-LIKE-2, len: 984 nt. Insertion sequence element IS-LIKE.  
/mobile\_element\_type="insertion sequence:IS-LIKE-2"

mobile\_element complement(1247221..1248649)  
/note="IS1081-2, len: 1429 nt. Insertion sequence IS1081.  
/mobile\_element\_type="insertion sequence:IS1081-2"

mobile\_element complement(1371981..1373489)  
/note="IS1557-2, len: 1509 nt. Insertion sequence IS1557.  
/mobile\_element\_type="insertion sequence:IS1557-2"

mobile\_element complement(1442787..1444141)  
/note="IS6110-2, len: 1355 nt. Almost identical to Insertion sequence IS986 element.  
/mobile\_element\_type="insertion sequence:IS6110-2"

mobile\_element complement(1862979..1864333)  
/note="IS6110-3, len: 1355 nt. Insertion sequence IS6110.  
/mobile\_element\_type="insertion sequence:IS6110-3"

mobile\_element 1871377..1872731  
/note="IS6110-4, len: 1355 nt. Insertion sequence IS6110.  
/mobile\_element\_type="insertion sequence:IS6110-4"

mobile\_element complement(1873860..1875089)  
/note="ISB9', len: 1230 nt. Insertion sequence ISB9, nearly identical to EM\_BA:MTU78639. Note that this sequence shows several differences to EM\_BA: MTU78639, and the transposase ORFs are extensively frameshifted. Our sequence has been checked and is thought to be correct; the sequence in EM\_BA:MTU78639 is from a different isolate of Mycobacterium tuberculosis. /mobile\_element\_type="insertion sequence:ISB9'"

mobile\_element 2107174..2108401  
/note="IS1607, len: 1228 nt. Vestigial Insertion sequence element, IS1607.  
/mobile\_element\_type="insertion sequence:IS1607"

mobile\_element 2189673..2191141  
/note="IS1556, len: 1469 nt. Possible Insertion sequence-like region. This region is a possible MT-complex-specific genomic island (See Becq et al.,2007).  
/mobile\_element\_type="insertion sequence:IS1556"

mobile\_element 2210667..2212021  
/note="IS6110-5, len: 1355 nt. Insertion sequence IS6110.  
/mobile\_element\_type="insertion sequence:IS6110-5"

mobile\_element complement(2270549..2271903)  
/note="IS6110-6, len: 1355 nt. Insertion sequence IS6110.  
/mobile\_element\_type="insertion sequence:IS6110-6"

mobile\_element complement(2279577..2280380)  
/note="IS1558-1, len: 804 nt. Insertion sequence IS1558,nearly identical to complement of region 24105 24908 in EM\_BA:MTCY428 Z81451 Mycobacterium tuberculosis cosmid Y428. /mobile\_element\_type="insertion sequence:IS1558-1"

mobile\_element 2390446..2391800  
/note="IS6110-7, len: 1355 nt. Insertion sequence IS6110.  
/mobile\_element\_type="insertion sequence:IS6110-7"

mobile\_element 2471393..2472731  
/note="IS6110-8, len: 1355 nt. Insertion sequence IS6110 element that appears to have inserted in 5'-end of MTCY98.031c but is not flanked by expected 3 bp direct repeats of target sequence. /mobile\_element\_type="insertion sequence:IS6110-8"

mobile\_element complement(2552739..2553737)  
/note="IS1558-2, len: 999 nt. Insertion sequence IS1558.  
/mobile\_element\_type="insertion sequence:IS1558-2"

mobile\_element complement(2615689..2617045)  
/note="IS6110-9, len: 1357 nt. Insertion sequence IS6110.  
/mobile\_element\_type="insertion sequence:IS6110-9"

mobile\_element complement(2652496..2653945)  
/note="IS1081-3, len: 1450 nt. Insertion sequence IS1081.  
/mobile\_element\_type="insertion sequence:IS1081-3"

mobile\_element 2787539..2788893  
/note="IS6110-10, len: 1355 nt. Insertion sequence IS6110.  
/mobile\_element\_type="insertion sequence:IS6110-10"

mobile\_element 2798376..2799284  
/note="IS1081'-4, len: 909 nt. Defective Insertion sequence IS1081 element; truncated at 3'-end. /mobile\_element\_type="insertion sequence:IS1081'-4"

mobile\_element 2910865..2912896  
/note="IS1602, len: 2032 nt. Insertion sequence IS1602.  
/mobile\_element\_type="insertion sequence:IS1602"



mobile\_element complement(2926434..2926832)  
/note="IS1555', len: 399 nt. Probable defective Insertion sequence element, IS1555. This region is a possible MT-complex-specific genomic island (See Becq et al., 2007). /mobile\_element\_type="insertion sequence:IS1555'"

mobile\_element 2927507..2928915  
/note="IS1604, len: 1409 nt. Insertion sequence IS1604. This region is a possible MT-complex-specific genomic island (See Becq et al., 2007). /mobile\_element\_type="insertion sequence:IS1604"

mobile\_element complement(2931213..2932587)  
/note="IS6110-11, len: 1375 nt. Insertion sequence IS6110. This region is a possible MT-complex-specific genomic island (See Becq et al., 2007). /mobile\_element\_type="insertion sequence:IS6110-11"

mobile\_element complement(3003008..3005274)  
/note="IS1539, len: 2267 nt. Insertion sequence IS1539. /mobile\_element\_type="insertion sequence:IS1539"

mobile\_element 3096078..3098119  
/note="IS1533, len: 2042 nt. Minimum region corresponding to Insertion sequence IS1533. /mobile\_element\_type="insertion sequence:IS1533"

mobile\_element complement(3141383..3143407)  
/note="IS1538, len: 2025 nt. Similar to other Insertion sequence elements in M. tuberculosis e.g. IS1535, IS1536, IS1537, & IS1539 (EM\_NEW:MTCY274 Z74024 Mycobacterium tuberculosis cosmid Y274) /mobile\_element\_type="insertion sequence:IS1538"

mobile\_element 3187259..3188582  
/note="IS1081-5, len: 1324 nt. Insertion sequence IS1081. /mobile\_element\_type="insertion sequence:IS1081-5"

mobile\_element 3287307..3288630  
/note="IS1081-6, len: 1324 nt. Insertion sequence IS1081. This region is a possible MT-complex-specific genomic island (See Becq et al., 2007). /mobile\_element\_type="insertion sequence:IS1081-6"

mobile\_element 3351417..3352771  
/note="IS6110-12, len: 1355 nt. Insertion sequence IS6110. This region is a possible MT-complex-specific genomic island (See Becq et al., 2007). /mobile\_element\_type="insertion sequence:IS6110-12"

mobile\_element 3352900..3354254  
/note="IS6110-13, len: 1355 nt. Insertion sequence IS6110. This region is a possible MT-complex-specific genomic island (See Becq et al., 2007). /mobile\_element\_type="insertion sequence:IS6110-13"

mobile\_element complement(3357501..3358532)  
/note="IS1603, len: 1032 nt. Insertion sequence IS1603. This region is a possible MT-complex-specific genomic island (See Becq et al., 2007). /mobile\_element\_type="insertion sequence:IS1603"

mobile\_element 3510569..3511923  
/note="IS6110-14, len: 1355 nt. Insertion sequence IS6110. /mobile\_element\_type="insertion sequence:IS6110-14"

mobile\_element 3511924..3513009  
/note="IS1547-2, len: 1086 nt. Region corresponding to Insertion sequence IS1547, positions 1982 3067 in EM\_NEW:MTY13470. /mobile\_element\_type="insertion sequence:IS1547-2"

mobile\_element 3531115..3531603  
/note="IS1608', len: 489 nt. Insertion sequence IS1608'. /mobile\_element\_type="insertion sequence:IS1608'"

mobile\_element complement(3531646..3532383)  
/note="IS1561', len: 738 nt. Insertion sequence IS1561'. /mobile\_element\_type="insertion sequence:IS1561'"

mobile\_element 3559490..3560844  
/note="IS6110-15, len: 1355 nt. Insertion sequence IS6110. /mobile\_element\_type="insertion sequence:IS6110-15"

mobile\_element 3564419..3565986  
/note="IS1560-2, len: 1568 nt. Possible Insertion sequence element IS\_1560. Second copy in MTCY10G2 from 11273 to 12919. /mobile\_element\_type="insertion sequence:IS1560-2"

mobile\_element complement(3604894..3606976)  
/note="IS1532, len: 2083 nt. Insertion sequence IS1532. /mobile\_element\_type="insertion sequence:IS1532"

mobile\_element complement(3608171..3609275)  
/note="IS1540, len: 1163 nt. Insertion sequence IS1540. /mobile\_element\_type="insertion sequence:IS1540"

mobile\_element complement(3609765..3610609)

mobile\_element /note="IS1552, len: 845 nt. Insertion sequence IS1552."  
/mobile\_element\_type="insertion sequence:IS1552"  
3651248..3652602

mobile\_element /note="IS6110-16, len: 1355 nt. Insertion sequence IS6110."  
/mobile\_element\_type="insertion sequence:IS6110-16"  
3804250..3806385

mobile\_element /note="IS1534, len: 2136 nt. Putative Insertion sequence element, IS1534 (IS15C10.2),  
that resembles IS21; possibly defective. /mobile\_element\_type="insertion  
sequence:IS1534"  
complement(3807141..3808433)

mobile\_element /note="IS1553, len: 1293 nt. Putative Insertion sequence element, IS1553."  
/mobile\_element\_type="insertion sequence:IS1553"  
3978929..3980260

mobile\_element /note="IS1557-3, len: 1332 nt. Insertion sequence IS1557."  
/mobile\_element\_type="insertion sequence:IS1557-3"  
complement(4025964..4027836)

mobile\_element /note="IS1537, len: 1873 nt. Insertion sequence IS1537."  
/mobile\_element\_type="insertion sequence:IS1537"

mobile\_element complement(1073125..1073224)  
/note="IS1560-1, len: 1513 nt. Insertion sequence IS1560."  
/mobile\_element\_type="insertion sequence:IS1560-1"

mobile\_element complement(1234431..1234614)  
/note="IS1081-2, len: 1429 nt. Insertion sequence IS1081."  
/mobile\_element\_type="insertion sequence:IS1081-2"

mobile\_element complement(3544100..3544196)  
/note="IS1532, len: 2083 nt. Insertion sequence IS1532."  
/mobile\_element\_type="insertion sequence:IS1532"

mobile\_element complement(3545391..3545391)  
/note="IS1540, len: 1163 nt. Insertion sequence IS1540."  
/mobile\_element\_type="insertion sequence:IS1540"

mobile\_element complement(3545879..3545879)  
/note="IS1552, len: 845 nt. Insertion sequence IS1552."  
/mobile\_element\_type="insertion sequence:IS1552"

CDS complement(1646761..1646865)  
/locus\_tag="Rv1572c"  
/note="Rv1572c, (MTCY336.31B), len: 34 aa. Partial ORF, part of REP13E12 repeat element; 3' end of Rv1587c (MTCY336.17) after phage-like element (see citation below). Similar to C-terminal ends of other REP13E12 repeat elements e.g. Rv1148, Rv1945, Rv3467, etc. Length extended since first submission (+7 aa). This region is a possible MT-complex-specific genomic island (See Becq et al., 2007)."  
/codon\_start=1  
/transl\_table=11  
/product="hypothetical protein"  
/protein\_id="NP\_216088.2"  
/db\_xref="GI:57116888 GeneID:886333"  
/translation="MECSSAVHGQPRNTTFHHHEKLLRHNDNEDNHDDP"

CDS 1646881..1647291  
/locus\_tag="Rv1573"  
/note="Rv1573, (MTCY336.31c), len: 136 aa. Probable phiRv1 phage protein (see citation below). This region is a possible MT-complex-specific genomic island (See Becq et al., 2007)."  
/codon\_start=1  
/transl\_table=11  
/product="Probable PhiRv1 phage protein"  
/protein\_id="NP\_216089.1"  
/db\_xref="GI:15608711 GeneID:886337"  
/translation="MTTTPARFNHLVTVDLETGDRVCDRQVAETIRAWFPDAPLEVREALVRLQAALNRHEHTGELEAFRLRISVEHADAAGGDECGPAILAGRSQPEQAANRQLGLAGDDEPDGDDTPPWSRMIGLGGGSPAEDER"

CDS 1647497..1647808  
/locus\_tag="Rv1574"  
/note="Rv1574, (MTCY336.30), len: 103 aa. Probable phiRV1 phage related protein (see citation below); some similarity to N-terminus of Rv1575|MTCY441.17 Probable phiRV1 phage protein (166 aa), E(): 1.5e-06; and Rv2647|MTCY336.29c Probable phiRV2 phage protein, E(): 3.5e-05. Helix turn helix motif present at aa 14-35 (+3.61 SD). This region is a possible MT-complex-specific genomic island (See Becq et al., 2007)."  
/codon\_start=1  
/transl\_table=11  
/product="Probable PhiRv1 phage related protein"  
/protein\_id="NP\_216090.1"  
/db\_xref="GI:15608712 GeneID:886331"  
/translation="MGYKPESERHSTKTDTAIGAALGISAGTYRRLKRIDNATHSDDKEIRRFAEQMAPLVAGSPSWNARKPRSANARVVASVHRSPMPALVPWNQSRLSATLTRR"

CDS 1647766..1648266  
/locus\_tag="Rv1575"  
/experiment="EXISTENCE: identified in proteomics study"  
/note="Rv1575, (MTCY336.29c), len: 166 aa. Probable phiRV1 phage protein (see citation below), showing similarity in N-terminal part to Rv1574|MTCY336.30c Probable phiRV1 phage protein (103 aa), FASTA score: opt: 375, E(): 3.8e-16, (60.2% identity in 103 aa overlap); and Rv2647 Probable phiRV2 phage protein. Start changed since first submission (+49 aa). This region is a possible MT-complex-specific genomic island (See Becq et al., 2007)."  
/codon\_start=1  
/transl\_table=11  
/product="Probable PhiRv1 phage protein"  
/protein\_id="NP\_216091.2"  
/db\_xref="GI:57116889 GeneID:886335"  
/translation="MEPKPSQRHTDKEVGAALGISAGTYKRLKRIDNATRSDDEIRLFAEQMAPLAAGSPSWNGRKPSSGNRKAATMAARLDILAWGPWAPSQNRSVVRRKQTLLSAQPSASPPAPTGGSNSTTQPAASWRVGGPAPLSRGRPRLALSYLRLGSLHLQNSKRVAHQHI"

CDS complement(1648210..1649631)  
/locus\_tag="Rv1576c"  
/experiment="EXISTENCE: identified in proteomics study"  
/note="Rv1576c, (MTCY336.28), len: 473 aa. Probable phiRV1 phage protein (capsid subunit) (see citation below). Highly similar to hypothetical Mycobacterium tuberculosis protein Rv2650c|MTCY441.19 phiRV2 phage related protein, FASTA scores: opt: 2782, E(): 0, (89.1% identity in 468 aa overlap). This region is a possible MT-complex-specific genomic island (See Becq et al., 2007)."  
/codon\_start=1  
/transl\_table=11  
/product="Probable PhiRv1 phage protein"  
/protein\_id="NP\_216092.1"  
/db\_xref="GI:15608714 GeneID:886327"

/translation="MTEFDDIKNLSLPETRDAAKQLLDSVAGDLTGEAAQRFQALTRHAEELRAEQRRRGREAEFEALRRYRAGEL  
 RVVPGAPTTGGDDGDAPPNGSLRDTAFRTLDCVDRDGLMSSRAAETAETLCRTGPPQSTSWAQRWLAATGSRDYLGAFTVKRVSNPV  
 AGHTVWTDREAAAWREAAVAEQRAMGLVDTQGGFLI PAALDPAILLSGDGTNP IRQVARVVQTTSEIWRGVTSEGAEARWYS  
 EAQEVSDDSPALAQPAVPNYRGSCWIPFSIELEGDAAAFVGEIGKILADSVEQLQAAAFVNGSGNGEPTGFVSALTGTSDQVVVG  
 AGSEAIVAADVYALQSALPPRFQASAAFAANLSTINTLRFQAETSNGALKFPPSLHDSPPMLAGKSVLEFVSHMDTVDSAVTATNHPL  
 VLGDWKQFLIGDRVGSVMVELVPHLFGPNRRPTGQRGFFAWFRVGSVDLVRNAFRVLKVVETTA"  
 CDS complement(1649639..1650151)  
 /locus\_tag="Rv1577c"  
 /note="Rv1577c, (MTCY336.27), len: 170 aa. Probable phiRv1 phage protein (prohead  
 protease) (see citation below). Highly similar to hypothetical protein  
 Rv2651c|MTCY441.20c phiRV2 prohead protease, FASTA scores: E(): 0, (89.3% identity in  
 169 aa overlap). Some similarity to VP4\_BPHK7|P49860 putative bacteriophage HK97  
 prohead protease (gp4) (225 aa), FASTA results: opt: 176, E(): 1.3e-05, (27.3%  
 identity in 165 aa overlap). This region is a possible MT-complex-specific genomic  
 island (See Becq et al., 2007)."  
 /codon\_start=1  
 /transl\_table=11  
 /product="Probable PhiRv1 phage protein"  
 /protein\_id="NP\_216093.1"  
 /db\_xref="GI:15608715 GeneID:886329"  
 /translation="MAELRSGEGRIVHGTIVPYNEATTVRDFDGEFQEMFAPGAFRRSIAERGHKLLKLLVSHDARTRYPVGRAVE  
 LREEPHGLFGAFEIADTPDGDEALANVKAGVVDVSFVSGFRPIRDRREGDVLVRVEAALLEVSLTGVPAYSGAQIAGVRAESLTVV  
 SRSTAEAWLSLLDW"  
 CDS complement(1650325..1650795)  
 /locus\_tag="Rv1578c"  
 /inference="protein motif:PROSITE:PS00221"  
 /note="Rv1578c, (MTCY336.26), len: 156 aa. Probable phiRv1 phage protein (terminase)  
 (see citation below), highly similar to Rv2652c|MTCY441.21c phiRV2 phage protein from  
 Mycobacterium tuberculosis, FASTA scores: E(): 4.8e-22, (48.1% identity in 156 aa  
 overlap). Also similar to X65555|ARP3COS\_1 hypothetical protein (cos site)  
 -actinophage RP3 (210 aa), FASTA scores: opt: 373, E(): 6.5e-17, (50.0% identity in  
 114 aa overlap). Contains MIP family signature (PS00221). This region is a possible  
 MT-complex-specific genomic island (See Becq et al., 2007)."  
 /codon\_start=1  
 /transl\_table=11  
 /product="Probable PhiRv1 phage protein"  
 /protein\_id="NP\_216094.1"  
 /db\_xref="GI:15608716 GeneID:886322"  
 /translation="MPRPPKPARLKLVEGRSPGRDSSGGRKVPESPKFIRQAPDAPDWLDAEALAEWRRVAPTLERLDLLKPEDRA  
 LLSAYCETWSVYVAAVQVRVRAEGLTITSPKSGVVHRNPAVTVAETARMHLLRLASEFGLTPAAEQRLAVAPGDDGDGLNPFAPDR"  
 CDS complement(1650876..1651190)  
 /locus\_tag="Rv1579c"  
 /note="Rv1579c, (MTCY336.25), len: 104 aa. Probable phiRv1 phage protein (see  
 citation below). This region is a possible MT-complex-specific genomic island (See  
 Becq et al., 2007)."  
 /codon\_start=1  
 /transl\_table=11  
 /product="Probable PhiRv1 phage protein"  
 /protein\_id="NP\_216095.1"  
 /db\_xref="GI:15608717 GeneID:886369"  
 /translation="MTPINRPLTNDERQLMHELAVQVCSQTCSPDAAVEALESFAKDGTLLIRGDTENAYLEAGGNVLVHADR  
 DWLAFHASYPGNPDPLRDARPIEQDDDDQAGAGSPS"  
 CDS complement(1651187..1651459)  
 /locus\_tag="Rv1580c"  
 /note="Rv1580c, (MTCY336.24), len: 90 aa. Probable phiRv1 phage protein (see citation  
 below). This region is a possible MT-complex-specific genomic island (See Becq et  
 al., 2007)."  
 /codon\_start=1  
 /transl\_table=11  
 /product="Probable PhiRv1 phage protein"  
 /protein\_id="NP\_216096.1"  
 /db\_xref="GI:15608718 GeneID:886313"  
 /translation="MAETPDHAELRRRIADMAFNADVGMATCKRCGDAVPYIILPNLQGTGPEVPMGVADNKWKRANCPVDVGKPCP  
 FLIAEGVADSTDDTIEVDQ"  
 CDS complement(1651473..1651868)  
 /locus\_tag="Rv1581c"  
 /note="Rv1581c, (MTCY336.23), len: 131 aa. Probable phiRv1 phage protein (see  
 citation below). This region is a possible MT-complex-specific genomic island (See  
 Becq et al., 2007)."

/codon\_start=1  
 /transl\_table=11  
 /product="Probable PhiRv1 phage protein"  
 /protein\_id="NP\_216097.1"  
 /db\_xref="GI:15608719 GeneID:886318"  
 /translation="MTAVAITPASGGRHSVRFAYDSAIVSLIKSTIPAYARSWSAHTRCWFIDADWTPLLAELRYHGHTVTGPA  
 DPAQQQCTDWAKALFRAVGPQRTPAVYRALSQVLPDAPTGCPILQQQLNAARTALTNPA"  
 complement(1652064..1653479)  
 /locus\_tag="Rv1582c"  
 /experiment="EXISTENCE: identified in proteomics study"  
 /note="Rv1582c, (MTCY336.22), len: 471 aa. Probable phiRv1 phage protein (see  
 citation below). N-terminus is similar to C-terminus of Q38030 ORF9 Bacteriophage  
 phi-C31 (519 aa), FASTA scores: opt: 331, E(): 6.5e-15, (28.5% identity in 235 aa  
 overlap); and C-terminus to whole of Q38031 ORF10 of Bacteriophage phi-C31 (202 aa),  
 FASTA scores: opt: 353, E(): 1e-16, (31.1% identity in 190 aa overlap). Also similar  
 to part of AB016282|AB016282\_42 Bacteriophage phi-105 (806 aa), FASTA scores: opt:  
 790, E(): 0, (32.7% identity in 459 aa overlap). Similarity to other phage proteins  
 described as putative DNA-polymerase or DNA-primase. Also slightly similar to  
 MTCY441.24c, FASTA scores: E(): 0.0055, (36.0% identity in 75 aa overlap). This  
 region is a possible MT-complex-specific genomic island (See Becq et al., 2007)."  
 /codon\_start=1  
 /transl\_table=11  
 /product="Probable PhiRv1 phage protein"  
 /protein\_id="NP\_216098.1"  
 /db\_xref="GI:15608720 GeneID:886311"  
 /translation="MADIPYGTDPADPWIDRDGHVLIDDGGKPTQVHRGQARIAYRLAERYQDKLLHVAGIGWHSWDGRRWAAD  
 DRGEAKRAVLAELRQALSDSLNDKELRADVRKCESASGVAGVLDLAAALVPFAATVADLSDPHLLNVANGTLDLHTLKLPHAP  
 ADRITKICRGAYQSDTESPLWQAFLTRVLPDEGVRGFVQRLAGVGLLGTVREHVLAILIGVGANGKSVFDKAI RYALGDYACTAE  
 PDLFMHRENAHPTGEMDLRGRWVAVSESEKDRRLAESTIKRLTGGDTIRARKMRQDFVEFTPSHTPLLTNHLPRVPGDDTAIW  
 RRIRVVPFEVVI PADEQDRELDARLQLEADSILSWAVAGWSYQIRIGLSQPDVLAATS NYRESDTIKRFIDDECVTSSPVLKA  
 TTTHLFEAWQRWRVQEGVPEISRKAFGQSLDTHGYPVTDKARDGRWRAGIAVRGADDFDD"  
 complement(1653479..1653877)  
 /locus\_tag="Rv1583c"  
 /note="Rv1583c, (MTCY336.21), len: 132 aa. Probable phiRv1 phage protein (see  
 citation below), highly similar to Rv2656c|MTCY441.25c phiRv2 phage protein (130 aa),  
 FASTA score: E(): 1.3e-33, (81.7% identity in 131 aa overlap). This region is a  
 possible MT-complex-specific genomic island (See Becq et al., 2007)."  
 /codon\_start=1  
 /transl\_table=11  
 /product="Probable PhiRv1 phage protein"  
 /protein\_id="NP\_216099.1"  
 /db\_xref="GI:15608721 GeneID:886315"  
 /translation="MTAGAGGSPPTRRCPATEDRAPATVATPSSADPTASRAVSWWSVHEHVAPVLDAAAGSWPMAGTPAWRQLDD  
 ADPRKWAACDAARHWALRVETCQEAMAQASRDVSAADWPFGIAREIVRRRGVYIPRAGVA"  
 complement(1653874..1654095)  
 /locus\_tag="Rv1584c"  
 /note="Rv1584c, (MTCY336.20), len: 73 aa. Possible phiRv1 phage protein (putative  
 excisionase) (see citation below). This region is a possible MT-complex-specific  
 genomic island (See Becq et al., 2007)."  
 /codon\_start=1  
 /transl\_table=11  
 /product="Possible PhiRv1 phage protein"  
 /protein\_id="NP\_216100.1"  
 /db\_xref="GI:15608722 GeneID:886307"  
 /translation="MSTIYHHRGRVAALSRSRASDDPEFIAAKTDLVAANIADYLI RITLAAAPPLTDEQRTRLAELLRPVRRSGG  
 AR"  
 complement(1654151..1654666)  
 /locus\_tag="Rv1585c"  
 /note="Rv1585c, (MTCY336.19), len: 171 aa. Possible phage phiRv1 protein (see Hatfull  
 2000). This region is a possible MT-complex-specific genomic island (See Becq et al.,  
 2007)."  
 /codon\_start=1  
 /transl\_table=11  
 /product="Possible phage PhiRv1 protein"  
 /protein\_id="NP\_216101.1"  
 /db\_xref="GI:15608723 GeneID:886309"  
 /translation="MSRHHNIVIVCDHGRKGDGRIEHERCDLVAPIIWVDETQGWLPQAPAVATLLDDDNQPRAVIGLPPNESRL  
 RPEMRRDGWVRLHWEFACLRVGAAGVRTCEQRPVVRVNGDLQTL CENVPRLLTGLAGNPDYAPGFVAVQSDAVVVAMWLWRTLCS  
 DTPNKLRATPTRGSC"

CDS complement(1654663..1656072)  
/locus\_tag="Rv1586c"  
/note="Rv1586c, (MTCY336.18), len: 469 aa. Probable phiRv1 integrase, possibly member of the serine family of recombinases (see citation below), similar to several bacteriophage integrases e.g. Q37839 ORF469 protein from Bacteriophage R4 (469 aa), FASTA scores: opt: 623, E(): 1.6e-29, (31.1% identity in 482 aa overlap); and Bacteriophage TP901-1. This region is a possible MT-complex-specific genomic island (See Becq et al.,2007)."  
/codon\_start=1  
/transl\_table=11  
/product="Probable PhiRv1 integrase"  
/protein\_id="NP\_216102.1"  
/db\_xref="GI:15608724 GeneID:886305"  
/translation="MRYTTPVRAAVYLRISEDRSGEQLGVARQREDCLKLQGRKWPVEYLDNDVSASTGKRRPAYEQMLADITAGKIAAVVAWDLDRHLHRRPIELEAFMSLADEKRLALATVAGDVLDLATPQGRVLRVLRKGSVAHAHETEKKARQRRARQKAERGHPNWSKAFGYLPGPNGPEPDPRATPLVKQAYADILAGASLGDVCRQWNDAGAFITITGRPWTTTTLSKFLRKPRNAGLRAYKGARYGPDVDRDAIVGKAQWSPLVDEATFWAAQAVLDAPGRAPGRKSVRRHLLTGLAGCGKCGNHLGASRYRTDQGVVYVCKACHGVAIADNI EPILYHIVAERLAMPDAVDLLRREIHDAEAETIRLELETLYGELDRLAVERAEGLLTARQVKISTDIVNAKITKLOARQQDQERLRVFDGIPLGTPQVAGMIAELSPDRFRAVLVDVLAEVVVVQPVGKSGRIFNPERVQVNWNR"

CDS complement(1655729..1656730)  
/locus\_tag="Rv1587c"  
/note="Rv1587c, (MTCY336.17), len: 333 aa. Partial REP13E12 repeat protein (see citation below), nearly identical (but has been interrupted by phiRv1 prophage) to Q50655|MTCY251.13c|Rv0094c hypothetical 34.6 kDa protein from M. tuberculosis (317 aa), FASTA results: opt: 1511,E(): 1.1e-84, (97.75% identity in 224 aa overlap). Codon usage suggests that translation may involve frameshifting of Rv1588c mRNA in poly\_C stretch into reading frame of Rv1587c. 3' end found in Rv1572c. Length extended since first submission (+115 aa). This region is a possible MT-complex-specific genomic island (See Becq et al.,2007)."  
/codon\_start=1  
/transl\_table=11  
/product="Partial REP13E12 repeat protein"  
/protein\_id="NP\_216103.2"  
/db\_xref="GI:57116890 GeneID:886303"  
/translation="MLAKLAAPGATNPDDHTPVIDITTPDAAAIDRDTRSQAQRNHGDLGLAGLRALIASGKLGQHNLGVPVIVVTTTLTDLQTGAGKGFYGGTLLPMADVIRMTSHAHYSPASGRYPQAI FHDHGTPLALYHTKRLASPAQRIMLFANDRGCTKPGCDAPAYHSQAHHVTAWTSTGRDITELTLACGPDNRLAEKGWTHNNTHGHEWLP PPHLDHGQPWTCEIHYTCACCLPPNLRPLRR TARRGPPTRGLPKAVRAAKMGARRVPRQRRQRINRQAPPRLRADVGRHRRRQDRRRGGLGPGPAPSPSHRAGSLHVISRREAAGP GHRRRRR"

CDS complement(2393568..2394023)  
/locus\_tag="Rv2309c"  
/note="Rv2309c, (MTCY3G12.25), len: 151 aa. Possible integrase (fragment), similar to others e.g. Q48908 integrase (fragment) from Mycobacterium paratuberculosis (191 aa), FASTA scores: opt: 279, E(): 3.2e-11, (40.4% identity in 136 aa overlap); etc. Also similar to others from Mycobacterium tuberculosis e.g. Rv1055|MTV017.08 integrase (fragment) (78 aa) (72.85% identity in 70 aa overlap); and Rv1054|MTV017.07 integrase (fragment). Could belong to the 'phage' integrase family. This region is a possible MT-complex-specific genomic island (See Becq et al.,2007)."  
/codon\_start=1  
/transl\_table=11  
/product="Possible integrase (fragment)"  
/protein\_id="NP\_216825.1"  
/db\_xref="GI:15609446 GeneID:885133"  
/translation="MTGAGIVETTTNRVRHVPVPEPVSERLRDELPTPEPNALVFPYSYRGHLP IEEYRRAFDFKCKAVGIADLVP HGLRHHTTASLAI SAGANVKVQVQRL LGHATAAMTLDRHGHLLSDDL AGVAGLLVQA IKSAAASLRYSDPDSVAVENISAAS"

CDS 2752126..2753124  
/locus\_tag="Rv2646"  
/note="Rv2646, (MTCY441.16), len: 332 aa. Probable integrase, similar to others e.g. P06723|VINT\_BP186|int integrase from Bacteriophage 186 (336 aa)s FASTA scores: opt: 198, E(): 6.3e-05, (30.45% identity in 138 aa overlap). Could be belong to the 'phage' integrase family."  
/codon\_start=1  
/transl\_table=11  
/product="Probable integrase"  
/protein\_id="NP\_217162.1"  
/db\_xref="GI:15609783 GeneID:887706"  
/translation="MNTATRVRLARKRADRLNLKLIKNGHHFRLRDADEITLAVGH LGVVEAFLAAAKSQNKPPGPPPSLHAPPS WRRDIDDYLLNLNAAGQRPATIRLRKTVLCAAHGLGRPPADVTAEHLLD WLGKQQLHSPEGRKTYRSTLRGFFVWAYEMDRVRD YVADSLPKVRCPKQPPRPAGDDVWQAALAKADRR IELMIRLAGEAGLRRAEAAQAHTGDLMDGGLLLVHGKGGKRRIVPISDYL A"

ALIRDTPHGYLFPNGTGGHLTAEHVQGLVSRALPGDATMHTLRHRYATRAYRGSNHLRAVQQLLGHASIVTTERYTALCDDEVRA  
AAAAAW"

CDS complement(2754015..2755454)  
/locus\_tag="Rv2650c"  
/experiment="EXISTENCE: identified in proteomics study"  
/note="Rv2650c, (MTCY441.19), len: 479 aa. Possible phiRv2 prophage protein (capsid subunit) (see citation below),highly similar to O06614|Rv1576c|MTCY336.28 probable phiRv1 phage protein from Mycobacterium tuberculosis (473 aa),FASTA scores: opt: 2782, E(): 2.8e-159, (89.1% identity in 468 aa overlap)."  
/codon\_start=1  
/transl\_table=11  
/product="Possible PhiRv2 prophage protein"  
/protein\_id="NP\_217166.1"  
/db\_xref="GI:15609787 GeneID:887478"  
/translation="MTNEQHFADDGDIKQLSLDETRSAAKQLLDSVEGDLTGDAQRFQALTRHAEELRAEQRRRGREAEELRR  
CRAGELRVVPGAPTGGDDGAPPGNLSLRDIAFRTLDCVDRDGLMSSRAEAETLCRTGPPQSTSWAQRWLAATGNRDYLGAFVK  
RVSNPVAGHTTWTDREAAAWREAAVAEAQRAMGLVDTAGGFLIPAALDPAILLSGDGSTNPIRQVARVVQTTSEVWRGVTSEGA  
EAHWYSEAQEVSDSDSPTLAQPAVPSYRGSWCWIPFSLEIEGDAAGFVAEVRVLAADSVLQAAAFVSGSGNGEPTGFVVSALTGTA  
DYTVTGAGTEAVVAADVYALQSALPPRFQSNFAANLSTINVLRQAETANGALKFPSLHASPPMLAGKHIWEVSNMMDTVDAV  
ATNYPLVLGDWKQFIITDRVGSIVLPHVFGGNRRPTGQRGFFCFWFRVGSVDVLVDNAFRVLKVVQTTA"

CDS complement(2755462..2755995)  
/locus\_tag="Rv2651c"  
/note="Rv2651c, (MTCY441.20c), len: 177 aa. Possible protease protein, phiRv2 phage protein (prohead protease) (see citation below), showing some similarity with several proteases e.g. Q9A4P4|CC2786 putative protease from Caulobacter crescentus (138 aa), FASTA scores: opt: 206,E(): 2e-06, (36.35% identity in 132 aa overlap); Q9RNH0 putative prohead protease from Rhodobacter capsulatus (Rhodopseudomonas capsulata) (184 aa), FASTA scores: opt: 196, E(): 1.1e-05, (35.05% identity in 137 aa overlap); BAB35014|ECS1591 putative prohead protease from Escherichia coli strain O157:H7 (185 aa), FASTA scores: opt: 187, E(): 4.1e-05, (32.9% identity in 158 aa overlap); etc. And highly similar to O06613|Rv1577c|MTCY336.27 Probable phiRv1 phage protein from Mycobacterium tuberculosis (170 aa),FASTA scores: opt: 987, E(): 2.3e-56, (89.35% identity in 169 aa overlap)."  
/codon\_start=1  
/transl\_table=11  
/product="Possible PhiRv2 prophage protease"  
/protein\_id="NP\_217167.1"  
/db\_xref="GI:15609788 GeneID:887837"  
/translation="MSSILFRTAELRPGEGRTVYGVIVPYGEVTTVRDLGDFREMFAPGAFRRSIAERGHKVKLLVSHDARTRY  
PVGRAVELREEPHGLFGAFELANTPDGDEALANVKAGVVDADFVSVGFPRIPDRREGDVIIVRVEAALLEVSLTGVPAYLGAQIAGVR  
AESLAVVSRSLAEARLALMDW"

CDS complement(2756148..2756774)  
/locus\_tag="Rv2652c"  
/note="Rv2652c, (MTCY441.21c), len: 208 aa. Probable phiRv2 phage protein (terminase) (see citation below), showing some similarity with AAK79859|Q97HW1|CAC1896 phage terminase-like protein (small subunit) from Clostridium acetobutylicum (151 aa), FASTA scores: opt: 155, E(): 0.012, (24.7% identity in 158 aa overlap); and Q9B019 hypothetical 17.8 kDa protein from Bacteriophage GMSE-1 (159 aa), FASTA scores: opt: 141, E(): 0.087, (27.65% identity in 159 aa overlap). Also highly similar to O06612|Rv1578c|MTCY336.26 Probable phiRv1 phage protein from Mycobacterium tuberculosis (156 aa), FASTA scores: opt: 448, E(): 1.2e-20, (48.1% identity in 156 aa overlap). Equivalent to AAK47043 from Mycobacterium tuberculosis strain CDC1551 but longer 45 aa."  
/codon\_start=1  
/transl\_table=11  
/product="Probable PhiRv2 prophage protein"  
/protein\_id="NP\_217168.1"  
/db\_xref="GI:15609789 GeneID:888577"  
/translation="MPSPATARPDTATVGERVRAQVLWGVFVHHGIRDPKPGKRRVVLKMGRRGPAPAPAQLKLLGGRSPGRDSDG  
GRRVTPPAAFERVAPECPDWLPPGAKDMWGRVPELALNLLKESDLGVLTSFCVAWDQLMQAVTAYREQGFIATNARSRRVTVH  
PAVAARAATRDLVVLARELGCTPSAEANLAAVLAAGDPDDDEFNPFAPDR"

CDS complement(2756806..2757129)  
/locus\_tag="Rv2653c"  
/note="Rv2653c, (MTCY441.22c), len: 107 aa. Hypothetical unknown protein, possibly phiRv2 phage protein (see citation below)."  
/codon\_start=1  
/transl\_table=11  
/product="Possible PhiRv2 prophage protein"  
/protein\_id="NP\_217169.1"



/db\_xref="GI:15609790 GeneID:887367"  
 /translation="MTHKRTRKQPPIAAGLNAPRRNRVGRQHGWPADVPSAEQRRARQRDLEAIRRAYAEMVATSHEIDDDTAE  
 LALLSMHLDDDEQRRLLEAGMKLWHPYHFPDEPDSKQ"  
 CDS complement(2757451..2758878)  
 /locus\_tag="Rv2655c"  
 /experiment="EXISTENCE: identified in proteomics study"  
 /note="Rv2655c, (MTCY441.24c), len: 475 aa. Hypothetical protein, possibly phiRv2  
 phage protein (putative primase-like protein) (see citation below). C-terminus  
 similar to P22875|YXIS\_SACER hypothetical 28.9 KDA protein (probably does not play a  
 direct role in plasmid integration or excision) from Saccharopolyspora erythraea  
 (Streptomyces erythraeus) plasmid pSE211 (263 aa), FASTA scores: opt: 389, E():  
 2.7e-15, (33.45% identity in 269 aa overlap). Weak similarity in N-terminus to  
 O06608|MTCY336.22|Rv1582c Probable phiRV1 phage protein from Mycobacterium  
 tuberculosis (471 aa), FASTA scores: opt: 133, E(): 2.5, (36.0% identity in 75 aa  
 overlap)."  
 /codon\_start=1  
 /transl\_table=11  
 /product="Possible PhiRv2 prophage protein"  
 /protein\_id="NP\_217171.1"  
 /db\_xref="GI:15609792 GeneID:887388"  
 /translation="MADIPYGRDYPDPIWCEDEGQPMPPVGAELLDDIRAFLLRRFVVYPSDHELIAHTLWIAHCWFMEAWDSTPR  
 IAFLSPPEPGSGKSRALVTEPLVPRPVHAINCTPAYLFRRVADPVGRRPTVLYDECDTLFGPKAKEHEEIRGVINAGHRKGA  
 VAGRCVIRGKIVETEELPAYCAVALAGLDDLPDTIMSRISIVVRMRRAPTEPVEPWRPRVNGPEAEKLDRLANWAAA  
 INPLESGWPAMPDGVTDRRADVWESLVAVADTAGGHWPKTARATAETDATANRGA KPSIGVLLLRDIRRVFSDRDRMRTSD  
 ILTGLNRMEEGPWGSIIRRGDPLDARGLATRLGRYGIGPKFQHSNGEPPYKGYSRTOFEDAWSRYLSADDETP  
 EERDLSVSAVSAVSPVGPDPGATGATD ATDLPEAGDLPYEPAPNGHPNGDAPLCSGPGCPNKLSTEAKAAGKCRPCR  
 GRAAASARDGAR"  
 CDS complement(2758880..2759272)  
 /locus\_tag="Rv2656c"  
 /note="Rv2656c, (MTCY441.25c), len: 130 aa. Probable phiRv2 phage protein (see  
 Hatfull 2000), highly similar to O06607|YF83\_MYCTU|Rv1583c|MT3573.2|MTCY336.21  
 Probable phiRV1 phage protein from Mycobacterium tuberculosis (132 aa), FASTA scores:  
 opt: 734, E(): 2.5e-39, (81.5% identity in 131 aa overlap); and some similarity with  
 Q982T4|MLL8506 hypothetical protein from Rhizobium loti (Mesorhizobium loti) (204  
 aa), FASTA scores: opt: 104, E(): 9.7, (31.85% identity in 113 aa overlap)."  
 /codon\_start=1  
 /transl\_table=11  
 /product="Possible PhiRv2 prophage protein"  
 /protein\_id="NP\_217172.1"  
 /db\_xref="GI:15609793 GeneID:888179"  
 /translation="MTAVGGSPPTRRCPATEDRAPATVATPSSTDPASRAVSWSVHEVYVAPTLAAAVEWPMAGTPAWCDLDDT  
 DPVKWAAICDAARHWALRVETCQAASAEASRDVSAADWPAVSREIQRRRDAYIRRVVV"  
 CDS complement(2759269..2759529)  
 /locus\_tag="Rv2657c"  
 /note="Rv2657c, (MTCY441.26c), len: 86 aa. Probable phiRv2 phage protein  
 (excisionase) (see citation below), similar to O22001|VG36\_BPMD2|36|G2 gene 36  
 protein (GP36) from Mycobacteriophage D29 (56 aa), FASTA scores: opt: 171, E():  
 9.6e-06, (48.0% identity in 50 aa overlap); and Q05246|VG36\_BPML5|36 gene 36 protein  
 (GP36) from Mycobacteriophage L5 (56 aa), FASTA scores: opt: 169, E(): 1.3e-05, (50%  
 identity in 50 aa overlap). Similarity suggests alternative start at 21737. Contains  
 possible helix-turn-helix motif from aa 33 to 54 (Score 1655, +4.82 SD)."  
 /codon\_start=1  
 /transl\_table=11  
 /product="Probable PhiRv2 prophage protein"  
 /protein\_id="NP\_217173.1"  
 /db\_xref="GI:15609794 GeneID:887399"  
 /translation="MCAFPSPSLGWTVSHETERPGMADAPPLSRRYITISEAAEYLAVTDRTVQRMIADGRLRGYRSGTRLVRLR  
 RDEVDGAMHPFGGAA"  
 CDS complement(2759911..2761038)  
 /locus\_tag="Rv2659c"  
 /note="Rv2659c, (MTCY441.28c), len: 375 aa. Probable integrase, phiRv2 phage protein:  
 putative member of the phage integrase family of tyrosine recombinases (see Hatfull  
 2000), highly similar to others e.g. P22884|VINT\_BPML5|33|int from Mycobacteriophage  
 L5 (371 aa), FASTA scores: opt: 836, E(): 1.2e-44, (39.0% identity in 372 aa  
 overlap); Q38361|VINT\_BPMD2|33|int from Mycobacteriophage D29 (333 aa), FASTA scores:  
 opt: 786, E(): 1.4e-41, (40.55% identity in 338 aa overlap); etc. Seems belongs to the  
 'phage' integrase family."  
 /codon\_start=1  
 /transl\_table=11  
 /product="Probable PhiRv2 prophage integrase"

CDS

```
/protein_id="NP_217175.1"  
/db_xref="GI:15609796 GeneID:885098"  
/translation="MTQTGKRQRRKFGRIRQFNSGRWQASYTGPDGRVYIAPKTFNAKIDAEAWLTDRRREIDRQLWSPASGQED  
RPGAPFGEYAEGWLKQRGIKDRTRAHYRKLKLDNHILATFADTDLRDITPAAVRRWYATTAVGTPTMRAHSYLLRAIMQTALADD  
LIDSNPCRISGASTARRVHKIRPATLDELETITKAMPDPYQAFVLMAAWLAAMRYGELTELRRKDIDLHGEVARVRRRAVVRVGE  
KVTTPKSDAGVRDISIPPHLIPAIEDHLHKHVNPGRESLLFSPVNDPNRHLAPSALYRMFYKARKAAGRDLRVHDLRHSGAVLA  
ASTGATLAELMQRLGHSTAGAALRYQHAACKGRDREIAALLSKLAENQEM"  
3854913..3855128  
/locus_tag="Rv3751"  
/note="Rv3751, (MTV025.099), len: 71 aa. Probable integrase (fragment), similar to  
part of many e.g. Q48908 integrase (fragment) from Mycobacterium paratuberculosis  
(191 aa),FASTA scores: opt: 206, E(): 5.5e-08, (57.65% identity in 59 aa overlap);  
Q9ZWW7|int integrase from Corynephage 304L (395 aa), FASTA scores: opt: 156, E():  
0.00036, (45.75% identity in 59 aa overlap); Q9K722|BH3551 integrase (phage-related  
protein) from Bacillus halodurans (378 aa),FASTA scores: opt: 151, E(): 0.00079,  
(46.15% identity in 52 aa overlap); etc. Also similarity with various conjugative  
transposons. Also similar to Mycobacterium tuberculosis hypothetical proteins e.g.  
P71903|Rv2309c|MTCY3G12.25 (151 aa), FASTA scores: opt: 193, E(): 3.8e-07, (50.85%  
identity in 59 aa overlap); O53403|Rv1055|MTV017.08 (78 aa), FASTA scores: opt:  
171,E(): 7.8e-06, (54.15% identity in 48 aa overlap); etc. This region is a possible  
MT-complex-specific genomic island (See Becq et al., 2007)."  
/codon_start=1  
/transl_table=11  
/product="Probable integrase (fragment)"  
/protein_id="NP_218268.1"  
/db_xref="GI:15610887 GeneID:885857"  
/translation="MKRAKVQQITPHDLRHTAASLAVSAGVNVLLALQRILGHKSAKVTLDTYADLFDADLDAVAVTLGKDADQQT"
```
